# Supplementary material for: Bioinformatic Analysis of Epigenetic and MicroRNA Mediated Regulation of Drought Responsive Genes in Rice
Source: PLoS One. 2012 Nov 8;7(11):e49331. doi: 10.1371/journal.pone.0049331 (PMC3493535; doi:10.1371/journal.pone.0049331)
Supplement: Table S2 — A: List of DRGs targeted by 1 or more miRNAs in PMRD. B: List of miRNAs targeting 1 or more DRGs. (XLSX) [file pone.0049331.s004.xlsx]

## Sheet: Table-S2
Table S2A. List of DRGs targeted by 1 or more miRNAs in PMRD						Table S2B. List of miRNAs targeting 1 or more DRGs
MSU ID	Count	miRNA IDs				miRNA ID	Count	MSU IDs
LOC_Os08g13430	339	osa-miRf10003-akr osa-miRf10004-akr osa-miRf10006-akr osa-miRf10014-akr osa-miRf10030-akr osa-miRf10034-akr osa-miRf10038-akr osa-miRf10047-akr osa-miRf10048-akr osa-miRf10059-akr osa-miRf10064-akr osa-miRf10066-akr osa-miRf10080-akr osa-miRf10090-akr osa-miRf10091-akr osa-miRf10110-akr osa-miRf10112-akr osa-miRf10114-akr osa-miRf10117-akr osa-miRf10125-akr osa-miRf10129-akr osa-miRf10131-akr osa…				osa-miRf10273-akr	103	LOC_Os01g07530;LOC_Os01g08440;LOC_Os01g12690;LOC_Os01g34790;LOC_Os01g39860;LOC_Os01g43650;LOC_Os01g47690;LOC_Os01g50100;LOC_Os01g58130;LOC_Os01g59100;LOC_Os01g72250;LOC_Os01g73590;LOC_Os01g74410;LOC_Os02g05470;LOC_Os02g09490;LOC_Os02g09850;LOC_Os02g15540;LOC_Os02g20560;LOC_Os02g39140;LOC_Os02g46970;LOC_Os02g47310;LOC_Os02g47950;LOC_Os02g57620;LOC_Os03g03450;LOC_Os03g03820;LOC_Os03g07570;LOC_Os03g…
LOC_Os05g18294	265	osa-miRf10004-akr osa-miRf10023-akr osa-miRf10030-akr osa-miRf10039-akr osa-miRf10059-akr osa-miRf10077-akr osa-miRf10090-akr osa-miRf10112-akr osa-miRf10117-akr osa-miRf10125-akr osa-miRf10133-akr osa-miRf10160-akr osa-miRf10191-akr osa-miRf10198-akr osa-miRf10217-akr osa-miRf10252-akr osa-miRf10265-akr osa-miRf10279-akr osa-miRf10285-akr osa-miRf10287-akr osa-miRf10291-akr osa-miRf10294-akr osa…				osa-miR414	75	LOC_Os01g01350;LOC_Os01g01510;LOC_Os01g01960;LOC_Os01g16670;LOC_Os01g21144;LOC_Os01g22990;LOC_Os01g25920;LOC_Os01g40610;LOC_Os01g46470;LOC_Os01g63980;LOC_Os01g71230;LOC_Os02g03750;LOC_Os02g09150;LOC_Os02g33780;LOC_Os02g36710;LOC_Os02g40040;LOC_Os02g47130;LOC_Os03g04920;LOC_Os03g21530;LOC_Os03g40110;LOC_Os03g49520;LOC_Os03g59340;LOC_Os03g62620;LOC_Os04g35760;LOC_Os04g36000;LOC_Os04g38620;LOC_Os04g…
LOC_Os11g25780	167	osa-miRf10003-akr osa-miRf10005-akr osa-miRf10039-akr osa-miRf10048-akr osa-miRf10050-akr osa-miRf10054-akr osa-miRf10057-akr osa-miRf10064-akr osa-miRf10080-akr osa-miRf10113-akr osa-miRf10114-akr osa-miRf10133-akr osa-miRf10156-akr osa-miRf10183-akr osa-miRf10234-akr osa-miRf10263-akr osa-miRf10269-akr osa-miRf10273-akr osa-miRf10279-akr osa-miRf10294-akr osa-miRf10299-akr osa-miRf10303-akr osa…				osa-miRf12029-akr	43	LOC_Os01g09790;LOC_Os01g15800;LOC_Os01g22990;LOC_Os01g65210;LOC_Os01g67480;LOC_Os01g68370;LOC_Os01g69070;LOC_Os02g04520;LOC_Os02g14900;LOC_Os02g19650;LOC_Os02g35180;LOC_Os02g36880;LOC_Os02g47950;LOC_Os03g03550;LOC_Os03g08170;LOC_Os03g49940;LOC_Os03g61720;LOC_Os04g32540;LOC_Os04g44780;LOC_Os04g47040;LOC_Os05g01940;LOC_Os05g13580;LOC_Os05g34830;LOC_Os05g41190;LOC_Os05g48900;LOC_Os06g11860;LOC_Os06g…
LOC_Os03g22050	57	osa-miR812a osa-miR812b osa-miR812c osa-miR812d osa-miR812e osa-miRf10099-akr osa-miRf10155-akr osa-miRf10179-akr osa-miRf10180-akr osa-miRf10218-akr osa-miRf10229-akr osa-miRf10302-akr osa-miRf10321-akr osa-miRf10334-akr osa-miRf10381-akr osa-miRf10401-akr osa-miRf10406-akr osa-miRf10514-akr osa-miRf10572-akr osa-miRf10603-akr osa-miRf10697-akr osa-miRf10710-akr osa-miRf10735-akr osa-miRf10808-a…				osa-miR1858a	37	LOC_Os01g08660;LOC_Os01g10580;LOC_Os01g43040;LOC_Os01g43870;LOC_Os01g47490;LOC_Os01g53800;LOC_Os02g03040;LOC_Os02g08540;LOC_Os02g53530;LOC_Os02g57140;LOC_Os03g08390;LOC_Os03g22780;LOC_Os03g29930;LOC_Os03g56060;LOC_Os04g34230;LOC_Os04g41900;LOC_Os04g42670;LOC_Os04g58280;LOC_Os05g47640;LOC_Os06g06780;LOC_Os06g29430;LOC_Os06g30130;LOC_Os06g45090;LOC_Os06g49890;LOC_Os06g51220;LOC_Os07g04840;LOC_Os07g…
LOC_Os06g12790	44	osa-miRf10099-akr osa-miRf10151-akr osa-miRf10155-akr osa-miRf10179-akr osa-miRf10180-akr osa-miRf10302-akr osa-miRf10401-akr osa-miRf10416-akr osa-miRf10572-akr osa-miRf10603-akr osa-miRf10710-akr osa-miRf10735-akr osa-miRf10808-akr osa-miRf10809-akr osa-miRf10810-akr osa-miRf10814-akr osa-miRf11002-akr osa-miRf11019-akr osa-miRf11044-akr osa-miRf11090-akr osa-miRf11202-akr osa-miRf11212-akr osa…				osa-miR1858b	37	LOC_Os01g08660;LOC_Os01g10580;LOC_Os01g43040;LOC_Os01g43870;LOC_Os01g47490;LOC_Os01g53800;LOC_Os02g03040;LOC_Os02g08540;LOC_Os02g53530;LOC_Os02g57140;LOC_Os03g08390;LOC_Os03g22780;LOC_Os03g29930;LOC_Os03g56060;LOC_Os04g34230;LOC_Os04g41900;LOC_Os04g42670;LOC_Os04g58280;LOC_Os05g47640;LOC_Os06g06780;LOC_Os06g29430;LOC_Os06g30130;LOC_Os06g45090;LOC_Os06g49890;LOC_Os06g51220;LOC_Os07g04840;LOC_Os07g…
LOC_Os06g23274	42	osa-miR1436 osa-miR441a osa-miR441b osa-miR441c osa-miR446 osa-miR808 osa-miR809a osa-miR809b osa-miR809c osa-miR809d osa-miR809e osa-miR809f osa-miR809g osa-miR809h osa-miRf10103-akr osa-miRf10146-akr osa-miRf10154-akr osa-miRf10173-akr osa-miRf10201-akr osa-miRf10218-akr osa-miRf10330-akr osa-miRf10406-akr osa-miRf10422-akr osa-miRf10429-akr osa-miRf10450-akr osa-miRf10805-akr osa-miRf10833-akr…				osa-miRf12002-akr	37	LOC_Os01g08460;LOC_Os01g11570;LOC_Os01g13460;LOC_Os01g43580;LOC_Os01g56080;LOC_Os01g56550;LOC_Os01g68650;LOC_Os01g69030;LOC_Os02g01270;LOC_Os02g05480;LOC_Os02g05670;LOC_Os02g15810;LOC_Os02g34860;LOC_Os03g01180;LOC_Os03g02050;LOC_Os03g08250;LOC_Os03g20870;LOC_Os03g27990;LOC_Os03g40830;LOC_Os03g60120;LOC_Os03g64150;LOC_Os04g56050;LOC_Os04g57150;LOC_Os05g07060;LOC_Os05g41070;LOC_Os05g46760;LOC_Os06g…
LOC_Os09g13440	39	osa-miRf10099-akr osa-miRf10155-akr osa-miRf10218-akr osa-miRf10302-akr osa-miRf10321-akr osa-miRf10401-akr osa-miRf10416-akr osa-miRf10421-akr osa-miRf10443-akr osa-miRf10572-akr osa-miRf10603-akr osa-miRf10710-akr osa-miRf10743-akr osa-miRf10808-akr osa-miRf10814-akr osa-miRf11002-akr osa-miRf11019-akr osa-miRf11202-akr osa-miRf11212-akr osa-miRf11213-akr osa-miRf11215-akr osa-miRf11216-akr osa…				osa-miRf10855-akr	35	LOC_Os01g12820;LOC_Os01g48850;LOC_Os01g66960;LOC_Os02g03750;LOC_Os02g44990;LOC_Os02g55480;LOC_Os03g05200;LOC_Os03g09880;LOC_Os03g14050;LOC_Os03g39610;LOC_Os03g44200;LOC_Os03g50070;LOC_Os03g52010;LOC_Os03g56830;LOC_Os04g02620;LOC_Os04g02640;LOC_Os04g58070;LOC_Os05g14900;LOC_Os05g33110;LOC_Os05g41190;LOC_Os05g49300;LOC_Os05g50570;LOC_Os06g06560;LOC_Os06g07914;LOC_Os06g17390;LOC_Os06g23274;LOC_Os07g…
LOC_Os03g15033	37	osa-miR808 osa-miR809a osa-miR809b osa-miR809c osa-miR809d osa-miR809e osa-miR809f osa-miR809g osa-miR809h osa-miR819a osa-miR819b osa-miR819c osa-miR819d osa-miR819e osa-miR819f osa-miR819g osa-miR819h osa-miR819i osa-miR819j osa-miR819k osa-miRf10146-akr osa-miRf10201-akr osa-miRf10246-akr osa-miRf10336-akr osa-miRf10429-akr osa-miRf10692-akr osa-miRf10761-akr osa-miRf10762-akr osa-miRf10787-ak…				osa-miRf10223-akr	33	LOC_Os01g41600;LOC_Os01g43040;LOC_Os01g62800;LOC_Os01g71680;LOC_Os01g74410;LOC_Os02g05670;LOC_Os02g28340;LOC_Os02g32080;LOC_Os02g41580;LOC_Os02g57720;LOC_Os03g01530;LOC_Os03g16010;LOC_Os03g21030;LOC_Os03g58790;LOC_Os05g33630;LOC_Os05g35440;LOC_Os05g51180;LOC_Os06g38970;LOC_Os06g43044;LOC_Os06g43430;LOC_Os06g46310;LOC_Os06g46910;LOC_Os06g49640;LOC_Os08g10080;LOC_Os08g33150;LOC_Os10g02500;LOC_Os10g…
LOC_Os01g12820	34	osa-miR1436 osa-miR445a osa-miR445b osa-miR445c osa-miR445d osa-miR445e osa-miR445f osa-miR445g osa-miR445h osa-miR445i osa-miR818a osa-miR818b osa-miR818c osa-miR818d osa-miR818e osa-miRf10173-akr osa-miRf10212-akr osa-miRf10406-akr osa-miRf10571-akr osa-miRf10572-akr osa-miRf10710-akr osa-miRf10855-akr osa-miRf11059-akr osa-miRf11060-akr osa-miRf11202-akr osa-miRf11518-akr osa-miRf11603-akr osa…				osa-miR1848	32	LOC_Os01g18370;LOC_Os01g47760;LOC_Os01g51320;LOC_Os01g60670;LOC_Os02g06410;LOC_Os02g07930;LOC_Os02g26720;LOC_Os02g32469;LOC_Os02g36110;LOC_Os02g39510;LOC_Os02g39930;LOC_Os02g53200;LOC_Os04g44410;LOC_Os04g51410;LOC_Os04g55240;LOC_Os05g05920;LOC_Os05g19030;LOC_Os05g19630;LOC_Os05g23610;LOC_Os05g45020;LOC_Os05g48930;LOC_Os05g49420;LOC_Os06g04070;LOC_Os06g37560;LOC_Os07g42420;LOC_Os07g43570;LOC_Os08g…
LOC_Os06g21890	33	osa-miRf10082-akr osa-miRf10116-akr osa-miRf10219-akr osa-miRf10238-akr osa-miRf10239-akr osa-miRf10283-akr osa-miRf10284-akr osa-miRf10330-akr osa-miRf10573-akr osa-miRf10574-akr osa-miRf10575-akr osa-miRf10602-akr osa-miRf10688-akr osa-miRf10698-akr osa-miRf10737-akr osa-miRf10738-akr osa-miRf10782-akr osa-miRf10899-akr osa-miRf10900-akr osa-miRf11171-akr osa-miRf11172-akr osa-miRf11177-akr osa…				osa-miRf10173-akr	32	LOC_Os01g12820;LOC_Os01g48850;LOC_Os01g66960;LOC_Os02g03750;LOC_Os02g44990;LOC_Os02g55480;LOC_Os03g05200;LOC_Os03g09880;LOC_Os03g14050;LOC_Os03g39610;LOC_Os03g44200;LOC_Os03g50070;LOC_Os03g52010;LOC_Os04g02620;LOC_Os04g02640;LOC_Os04g58070;LOC_Os05g14900;LOC_Os05g41190;LOC_Os05g49300;LOC_Os05g50570;LOC_Os06g06560;LOC_Os06g07914;LOC_Os06g17390;LOC_Os06g23274;LOC_Os07g41060;LOC_Os08g23870;LOC_Os09g…
LOC_Os07g49480	32	osa-miR1439 osa-miRf10155-akr osa-miRf10218-akr osa-miRf10401-akr osa-miRf10406-akr osa-miRf10568-akr osa-miRf10572-akr osa-miRf10603-akr osa-miRf10660-akr osa-miRf10710-akr osa-miRf10815-akr osa-miRf10830-akr osa-miRf11019-akr osa-miRf11090-akr osa-miRf11182-akr osa-miRf11202-akr osa-miRf11212-akr osa-miRf11213-akr osa-miRf11215-akr osa-miRf11218-akr osa-miRf11219-akr osa-miRf11270-akr osa-miRf1…				osa-miRf11133-akr	32	LOC_Os01g66960;LOC_Os02g03750;LOC_Os02g44990;LOC_Os02g55480;LOC_Os03g05200;LOC_Os03g09880;LOC_Os03g14050;LOC_Os03g39610;LOC_Os03g44200;LOC_Os03g50070;LOC_Os03g52010;LOC_Os03g56830;LOC_Os04g02620;LOC_Os04g02640;LOC_Os04g58070;LOC_Os05g14900;LOC_Os05g41190;LOC_Os05g49300;LOC_Os05g50570;LOC_Os06g06560;LOC_Os06g07914;LOC_Os06g17390;LOC_Os06g23274;LOC_Os07g41060;LOC_Os08g23870;LOC_Os09g12230;LOC_Os09g…
LOC_Os09g12230	31	osa-miR1436 osa-miR441a osa-miR441b osa-miR441c osa-miR446 osa-miR808 osa-miR809a osa-miR809b osa-miR809c osa-miR809d osa-miR809e osa-miR809f osa-miR809g osa-miR809h osa-miRf10146-akr osa-miRf10154-akr osa-miRf10173-akr osa-miRf10201-akr osa-miRf10336-akr osa-miRf10406-akr osa-miRf10429-akr osa-miRf10805-akr osa-miRf10855-akr osa-miRf11050-akr osa-miRf11132-akr osa-miRf11133-akr osa-miRf11457-akr…				osa-miRf10406-akr	30	LOC_Os01g07950;LOC_Os01g12820;LOC_Os01g13390;LOC_Os01g61610;LOC_Os02g30800;LOC_Os02g48770;LOC_Os03g22050;LOC_Os03g24870;LOC_Os03g44200;LOC_Os04g02640;LOC_Os04g32540;LOC_Os04g43290;LOC_Os05g43570;LOC_Os05g45820;LOC_Os06g08080;LOC_Os06g23274;LOC_Os06g39330;LOC_Os06g48060;LOC_Os07g48370;LOC_Os07g49480;LOC_Os08g36910;LOC_Os08g37444;LOC_Os09g12230;LOC_Os09g20000;LOC_Os09g29210;LOC_Os09g30140;LOC_Os09g…
LOC_Os05g25430	30	osa-miRf10179-akr osa-miRf10180-akr osa-miRf10302-akr osa-miRf10401-akr osa-miRf10429-akr osa-miRf10572-akr osa-miRf10710-akr osa-miRf10742-akr osa-miRf10808-akr osa-miRf10809-akr osa-miRf10810-akr osa-miRf10814-akr osa-miRf11059-akr osa-miRf11090-akr osa-miRf11212-akr osa-miRf11213-akr osa-miRf11215-akr osa-miRf11218-akr osa-miRf11219-akr osa-miRf11603-akr osa-miRf11604-akr osa-miRf11605-akr osa…				osa-miRf11050-akr	30	LOC_Os01g66960;LOC_Os02g03750;LOC_Os02g44990;LOC_Os02g55480;LOC_Os03g05200;LOC_Os03g09880;LOC_Os03g14050;LOC_Os03g39610;LOC_Os03g44200;LOC_Os03g50070;LOC_Os03g52010;LOC_Os04g02620;LOC_Os04g02640;LOC_Os04g58070;LOC_Os05g14900;LOC_Os05g33110;LOC_Os05g41190;LOC_Os05g49300;LOC_Os05g50570;LOC_Os06g06560;LOC_Os06g07914;LOC_Os06g23274;LOC_Os07g41060;LOC_Os08g23870;LOC_Os09g12230;LOC_Os09g34250;LOC_Os09g…
LOC_Os03g39610	29	osa-miR1436 osa-miR808 osa-miR809a osa-miR809b osa-miR809c osa-miR809d osa-miR809e osa-miR809f osa-miR809g osa-miR809h osa-miRf10154-akr osa-miRf10173-akr osa-miRf10201-akr osa-miRf10336-akr osa-miRf10429-akr osa-miRf10572-akr osa-miRf10805-akr osa-miRf10829-akr osa-miRf10830-akr osa-miRf10855-akr osa-miRf11050-akr osa-miRf11132-akr osa-miRf11133-akr osa-miRf11219-akr osa-miRf11457-akr osa-miRf11…				osa-miRf10947-akr	29	LOC_Os01g02150;LOC_Os01g08710;LOC_Os01g22660;LOC_Os01g47690;LOC_Os01g61080;LOC_Os01g62760;LOC_Os02g57720;LOC_Os03g07300;LOC_Os03g16010;LOC_Os03g43720;LOC_Os03g52070;LOC_Os04g41020;LOC_Os05g04680;LOC_Os05g06890;LOC_Os05g25920;LOC_Os05g38290;LOC_Os05g39720;LOC_Os06g48200;LOC_Os06g48680;LOC_Os07g07540;LOC_Os07g07900;LOC_Os07g17970;LOC_Os08g01950;LOC_Os08g29160;LOC_Os09g26460;LOC_Os09g31300;LOC_Os10g…
LOC_Os04g02640	29	osa-miR446 osa-miR808 osa-miR809a osa-miR809b osa-miR809c osa-miR809d osa-miR809e osa-miR809f osa-miR809g osa-miR809h osa-miRf10146-akr osa-miRf10154-akr osa-miRf10173-akr osa-miRf10201-akr osa-miRf10336-akr osa-miRf10406-akr osa-miRf10429-akr osa-miRf10762-akr osa-miRf10805-akr osa-miRf10855-akr osa-miRf11050-akr osa-miRf11132-akr osa-miRf11133-akr osa-miRf11457-akr osa-miRf11714-akr osa-miRf119…				osa-miRf11132-akr	29	LOC_Os01g66960;LOC_Os02g03750;LOC_Os02g44990;LOC_Os02g55480;LOC_Os03g05200;LOC_Os03g09880;LOC_Os03g14050;LOC_Os03g39610;LOC_Os03g44200;LOC_Os03g50070;LOC_Os03g52010;LOC_Os04g02620;LOC_Os04g02640;LOC_Os04g58070;LOC_Os05g41190;LOC_Os05g50570;LOC_Os06g06560;LOC_Os06g07914;LOC_Os06g17390;LOC_Os06g23274;LOC_Os07g41060;LOC_Os08g23870;LOC_Os09g12230;LOC_Os09g34250;LOC_Os09g39960;LOC_Os11g48070;LOC_Os12g…
LOC_Os02g44990	28	osa-miR1436 osa-miR441a osa-miR441b osa-miR441c osa-miR446 osa-miR808 osa-miR809a osa-miR809b osa-miR809c osa-miR809d osa-miR809e osa-miR809f osa-miR809g osa-miR809h osa-miRf10146-akr osa-miRf10154-akr osa-miRf10173-akr osa-miRf10201-akr osa-miRf10336-akr osa-miRf10429-akr osa-miRf10805-akr osa-miRf10855-akr osa-miRf11050-akr osa-miRf11132-akr osa-miRf11133-akr osa-miRf11457-akr osa-miRf12014-akr…				osa-miRf11457-akr	29	LOC_Os01g66960;LOC_Os02g03750;LOC_Os02g44990;LOC_Os02g55480;LOC_Os03g05200;LOC_Os03g09880;LOC_Os03g14050;LOC_Os03g39610;LOC_Os03g44200;LOC_Os03g50070;LOC_Os03g52010;LOC_Os04g02620;LOC_Os04g02640;LOC_Os04g58070;LOC_Os05g38150;LOC_Os05g41190;LOC_Os05g50570;LOC_Os06g06560;LOC_Os06g07914;LOC_Os06g17390;LOC_Os06g23274;LOC_Os06g46670;LOC_Os07g41060;LOC_Os08g23870;LOC_Os09g12230;LOC_Os09g34250;LOC_Os09g…
LOC_Os03g50070	28	osa-miR441a osa-miR441b osa-miR441c osa-miR446 osa-miR808 osa-miR809a osa-miR809b osa-miR809c osa-miR809d osa-miR809e osa-miR809f osa-miR809g osa-miR809h osa-miRf10146-akr osa-miRf10154-akr osa-miRf10173-akr osa-miRf10201-akr osa-miRf10319-akr osa-miRf10336-akr osa-miRf10805-akr osa-miRf10855-akr osa-miRf11050-akr osa-miRf11132-akr osa-miRf11133-akr osa-miRf11457-akr osa-miRf11821-akr osa-miRf120…				osa-miRf10063-akr	28	LOC_Os01g64750;LOC_Os01g65520;LOC_Os01g65790;LOC_Os01g70010;LOC_Os01g72570;LOC_Os02g06520;LOC_Os02g08150;LOC_Os02g48150;LOC_Os02g53200;LOC_Os02g54130;LOC_Os03g08170;LOC_Os03g15780;LOC_Os03g27830;LOC_Os03g58650;LOC_Os04g47040;LOC_Os05g07940;LOC_Os05g29710;LOC_Os05g35140;LOC_Os05g46040;LOC_Os05g47830;LOC_Os06g22390;LOC_Os06g41910;LOC_Os07g04110;LOC_Os07g07990;LOC_Os07g48830;LOC_Os07g49070;LOC_Os08g…
LOC_Os05g41190	28	osa-miR441a osa-miR441b osa-miR441c osa-miR446 osa-miR808 osa-miR809a osa-miR809b osa-miR809c osa-miR809d osa-miR809e osa-miR809f osa-miR809g osa-miR809h osa-miRf10146-akr osa-miRf10154-akr osa-miRf10173-akr osa-miRf10201-akr osa-miRf10336-akr osa-miRf10762-akr osa-miRf10805-akr osa-miRf10855-akr osa-miRf11050-akr osa-miRf11090-akr osa-miRf11132-akr osa-miRf11133-akr osa-miRf11457-akr osa-miRf120…				osa-miRf10272-akr	28	LOC_Os01g43650;LOC_Os01g50100;LOC_Os01g58130;LOC_Os01g59100;LOC_Os02g46970;LOC_Os03g09860;LOC_Os03g16920;LOC_Os03g21000;LOC_Os03g53750;LOC_Os04g36670;LOC_Os04g54210;LOC_Os05g31910;LOC_Os05g35060;LOC_Os05g36010;LOC_Os05g36160;LOC_Os05g43310;LOC_Os05g51070;LOC_Os06g34390;LOC_Os06g40818;LOC_Os06g43044;LOC_Os06g43090;LOC_Os07g34640;LOC_Os08g10080;LOC_Os08g35620;LOC_Os09g28210;LOC_Os11g41600;LOC_Os12g…
LOC_Os06g13190	28	osa-miRf10202-akr osa-miRf10203-akr osa-miRf10273-akr osa-miRf10684-akr osa-miRf10820-akr osa-miRf10871-akr osa-miRf10872-akr osa-miRf10873-akr osa-miRf10874-akr osa-miRf11009-akr osa-miRf11035-akr osa-miRf11082-akr osa-miRf11128-akr osa-miRf11129-akr osa-miRf11207-akr osa-miRf11315-akr osa-miRf11359-akr osa-miRf11360-akr osa-miRf11688-akr osa-miRf11701-akr osa-miRf11702-akr osa-miRf11791-akr osa…				osa-miRf11025-akr	27	LOC_Os01g42840;LOC_Os01g65670;LOC_Os01g70440;LOC_Os03g42520;LOC_Os03g57450;LOC_Os03g61270;LOC_Os04g34080;LOC_Os04g36670;LOC_Os04g37700;LOC_Os04g38810;LOC_Os05g35140;LOC_Os05g37250;LOC_Os05g46460;LOC_Os06g12810;LOC_Os06g17390;LOC_Os06g17460;LOC_Os06g40818;LOC_Os07g11360;LOC_Os07g13030;LOC_Os07g29240;LOC_Os08g32920;LOC_Os08g44270;LOC_Os09g17152;LOC_Os10g31820;LOC_Os10g35950;LOC_Os11g37900;LOC_Os11g…
LOC_Os09g30140	28	osa-miR819a osa-miR819b osa-miR819c osa-miR819d osa-miR819e osa-miR819f osa-miR819g osa-miR819h osa-miR819i osa-miR819j osa-miR819k osa-miRf10146-akr osa-miRf10246-akr osa-miRf10336-akr osa-miRf10406-akr osa-miRf10429-akr osa-miRf10692-akr osa-miRf10761-akr osa-miRf10762-akr osa-miRf10787-akr osa-miRf10985-akr osa-miRf11042-akr osa-miRf11043-akr osa-miRf11308-akr osa-miRf11491-akr osa-miRf11714-a…				osa-miRf11073-akr	26	LOC_Os01g04350;LOC_Os01g39040;LOC_Os01g51320;LOC_Os01g53920;LOC_Os01g59020;LOC_Os02g09940;LOC_Os02g22160;LOC_Os02g45760;LOC_Os03g43650;LOC_Os03g57149;LOC_Os04g38220;LOC_Os04g42580;LOC_Os04g55240;LOC_Os05g03070;LOC_Os05g48390;LOC_Os05g49010;LOC_Os06g24070;LOC_Os06g37080;LOC_Os07g07410;LOC_Os07g09710;LOC_Os07g34370;LOC_Os07g44190;LOC_Os09g26144;LOC_Os09g36930;LOC_Os11g25780;LOC_Os12g04360
LOC_Os11g06570	28	osa-miRf10012-akr osa-miRf10016-akr osa-miRf10081-akr osa-miRf10192-akr osa-miRf10233-akr osa-miRf10355-akr osa-miRf10529-akr osa-miRf10530-akr osa-miRf10531-akr osa-miRf10582-akr osa-miRf10631-akr osa-miRf10732-akr osa-miRf10905-akr osa-miRf10922-akr osa-miRf10923-akr osa-miRf11125-akr osa-miRf11255-akr osa-miRf11311-akr osa-miRf11430-akr osa-miRf11527-akr osa-miRf11552-akr osa-miRf11574-akr osa…				osa-miRf11090-akr	26	LOC_Os01g13390;LOC_Os01g13560;LOC_Os01g68580;LOC_Os02g16709;LOC_Os03g48380;LOC_Os04g45970;LOC_Os05g03610;LOC_Os05g12400;LOC_Os05g25430;LOC_Os05g41190;LOC_Os05g43570;LOC_Os06g12790;LOC_Os06g14050;LOC_Os06g48060;LOC_Os07g22930;LOC_Os07g49480;LOC_Os08g28710;LOC_Os09g20000;LOC_Os09g33690;LOC_Os10g05069;LOC_Os11g14570;LOC_Os12g06200;LOC_Os12g06490;LOC_Os12g12470;LOC_Os12g38051;LOC_Os12g43550
LOC_Os01g33800	27	osa-miR2093-3p osa-miRf10121-akr osa-miRf10216-akr osa-miRf10306-akr osa-miRf10309-akr osa-miRf10358-akr osa-miRf10359-akr osa-miRf10472-akr osa-miRf10594-akr osa-miRf10635-akr osa-miRf10816-akr osa-miRf10836-akr osa-miRf10837-akr osa-miRf10838-akr osa-miRf11027-akr osa-miRf11063-akr osa-miRf11157-akr osa-miRf11164-akr osa-miRf11262-akr osa-miRf11365-akr osa-miRf11417-akr osa-miRf11558-akr osa-mi…				osa-miRf10154-akr	24	LOC_Os02g03750;LOC_Os02g44990;LOC_Os02g55480;LOC_Os03g09880;LOC_Os03g14050;LOC_Os03g39610;LOC_Os03g44200;LOC_Os03g50070;LOC_Os03g52010;LOC_Os04g02620;LOC_Os04g02640;LOC_Os04g58070;LOC_Os05g41190;LOC_Os06g06560;LOC_Os06g07914;LOC_Os06g17390;LOC_Os06g23274;LOC_Os07g41060;LOC_Os09g12230;LOC_Os09g34250;LOC_Os09g39960;LOC_Os12g31860;LOC_Os12g32610;LOC_Os12g37510
LOC_Os03g16470	26	osa-miRf10099-akr osa-miRf10155-akr osa-miRf10179-akr osa-miRf10180-akr osa-miRf10401-akr osa-miRf10572-akr osa-miRf10710-akr osa-miRf10808-akr osa-miRf10809-akr osa-miRf10810-akr osa-miRf10814-akr osa-miRf11212-akr osa-miRf11213-akr osa-miRf11218-akr osa-miRf11219-akr osa-miRf11270-akr osa-miRf11603-akr osa-miRf11604-akr osa-miRf11605-akr osa-miRf11612-akr osa-miRf11618-akr osa-miRf11624-akr osa…				osa-miRf10805-akr	24	LOC_Os02g03750;LOC_Os02g44990;LOC_Os02g55480;LOC_Os03g09880;LOC_Os03g14050;LOC_Os03g39610;LOC_Os03g44200;LOC_Os03g50070;LOC_Os03g52010;LOC_Os03g54130;LOC_Os04g02620;LOC_Os04g02640;LOC_Os04g58070;LOC_Os05g41190;LOC_Os06g06560;LOC_Os06g07914;LOC_Os06g17390;LOC_Os06g23274;LOC_Os09g12230;LOC_Os09g34250;LOC_Os09g39960;LOC_Os12g31860;LOC_Os12g32610;LOC_Os12g37510
LOC_Os04g58070	26	osa-miR1436 osa-miR446 osa-miR808 osa-miR809a osa-miR809b osa-miR809c osa-miR809d osa-miR809e osa-miR809f osa-miR809g osa-miR809h osa-miRf10146-akr osa-miRf10154-akr osa-miRf10173-akr osa-miRf10201-akr osa-miRf10336-akr osa-miRf10429-akr osa-miRf10762-akr osa-miRf10805-akr osa-miRf10844-akr osa-miRf10855-akr osa-miRf11050-akr osa-miRf11132-akr osa-miRf11133-akr osa-miRf11457-akr osa-miRf12014-akr				osa-miRf10863-akr	24	LOC_Os01g41870;LOC_Os01g71170;LOC_Os02g31080;LOC_Os02g51860;LOC_Os02g54600;LOC_Os03g10750;LOC_Os03g16080;LOC_Os04g01780;LOC_Os04g41340;LOC_Os04g44780;LOC_Os04g59120;LOC_Os05g48690;LOC_Os06g05650;LOC_Os06g49890;LOC_Os07g40040;LOC_Os07g44020;LOC_Os07g49070;LOC_Os08g37350;LOC_Os09g31300;LOC_Os10g39920;LOC_Os11g03390;LOC_Os11g08100;LOC_Os11g34450;LOC_Os12g05210
LOC_Os06g07914	26	osa-miR1436 osa-miR446 osa-miR808 osa-miR809a osa-miR809b osa-miR809c osa-miR809d osa-miR809e osa-miR809f osa-miR809g osa-miR809h osa-miRf10154-akr osa-miRf10173-akr osa-miRf10201-akr osa-miRf10336-akr osa-miRf10620-akr osa-miRf10805-akr osa-miRf10855-akr osa-miRf11050-akr osa-miRf11132-akr osa-miRf11133-akr osa-miRf11457-akr osa-miRf11656-akr osa-miRf12014-akr osa-miRf12015-akr osa-miRf12016-akr				osa-miRf10429-akr	23	LOC_Os01g72370;LOC_Os02g44990;LOC_Os03g15033;LOC_Os03g29540;LOC_Os03g39610;LOC_Os03g44200;LOC_Os03g54130;LOC_Os04g02640;LOC_Os04g27190;LOC_Os04g58070;LOC_Os05g25430;LOC_Os06g06560;LOC_Os06g17390;LOC_Os06g23274;LOC_Os08g34050;LOC_Os09g12230;LOC_Os09g30140;LOC_Os09g39910;LOC_Os10g40740;LOC_Os11g42970;LOC_Os12g31860;LOC_Os12g32610;LOC_Os12g37510
LOC_Os12g40920	26	osa-miR808 osa-miR809a osa-miR809b osa-miR809c osa-miR809d osa-miR809e osa-miR809f osa-miR809g osa-miR809h osa-miRf10146-akr osa-miRf10201-akr osa-miRf10336-akr osa-miRf10692-akr osa-miRf10761-akr osa-miRf10762-akr osa-miRf10985-akr osa-miRf11042-akr osa-miRf11043-akr osa-miRf11308-akr osa-miRf11491-akr osa-miRf11714-akr osa-miRf11955-akr osa-miRf11996-akr osa-miRf12014-akr osa-miRf12015-akr osa-…				osa-miRf10201-akr	22	LOC_Os02g44990;LOC_Os03g09880;LOC_Os03g15033;LOC_Os03g39610;LOC_Os03g44200;LOC_Os03g50070;LOC_Os03g54130;LOC_Os04g02620;LOC_Os04g02640;LOC_Os04g58070;LOC_Os05g41190;LOC_Os05g49300;LOC_Os06g07914;LOC_Os06g08080;LOC_Os06g17390;LOC_Os06g23274;LOC_Os07g41060;LOC_Os09g12230;LOC_Os09g34250;LOC_Os09g39910;LOC_Os12g32610;LOC_Os12g40920
LOC_Os02g08410	25	osa-miRf10032-akr osa-miRf10168-akr osa-miRf10211-akr osa-miRf10329-akr osa-miRf10441-akr osa-miRf10490-akr osa-miRf10495-akr osa-miRf10496-akr osa-miRf10759-akr osa-miRf10876-akr osa-miRf11003-akr osa-miRf11268-akr osa-miRf11319-akr osa-miRf11356-akr osa-miRf11357-akr osa-miRf11434-akr osa-miRf11503-akr osa-miRf11504-akr osa-miRf11508-akr osa-miRf11509-akr osa-miRf11510-akr osa-miRf11514-akr osa…				osa-miRf11738-akr	21	LOC_Os01g12820;LOC_Os02g50372;LOC_Os03g16470;LOC_Os03g22050;LOC_Os03g29540;LOC_Os04g45970;LOC_Os05g25430;LOC_Os06g06080;LOC_Os06g06490;LOC_Os06g12790;LOC_Os06g23274;LOC_Os07g41060;LOC_Os07g49480;LOC_Os08g28710;LOC_Os08g38480;LOC_Os09g07154;LOC_Os09g13440;LOC_Os10g05069;LOC_Os10g40740;LOC_Os12g12470;LOC_Os12g35340
LOC_Os07g32170	25	osa-miR156a osa-miR156b osa-miR156c osa-miR156d osa-miR156e osa-miR156f osa-miR156g osa-miR156h osa-miR156i osa-miR156j osa-miR156k osa-miR156l osa-miR156m osa-miR156n osa-miR156o osa-miR156p osa-miR156q osa-miR156r osa-miRf10044-akr osa-miRf10088-akr osa-miRf10111-akr osa-miRf10895-akr osa-miRf11286-akr osa-miRf11334-akr osa-miRf11566-akr				osa-miRf12014-akr	21	LOC_Os02g44990;LOC_Os03g39610;LOC_Os03g44200;LOC_Os03g50070;LOC_Os03g52010;LOC_Os03g52340;LOC_Os03g54130;LOC_Os04g02620;LOC_Os04g02640;LOC_Os04g40740;LOC_Os04g58070;LOC_Os05g13940;LOC_Os05g41190;LOC_Os06g06560;LOC_Os06g07914;LOC_Os06g23274;LOC_Os07g41060;LOC_Os09g12230;LOC_Os12g31860;LOC_Os12g32610;LOC_Os12g40920
LOC_Os07g41060	25	osa-miR446 osa-miR808 osa-miR809a osa-miR809b osa-miR809c osa-miR809d osa-miR809e osa-miR809f osa-miR809g osa-miR809h osa-miRf10146-akr osa-miRf10154-akr osa-miRf10173-akr osa-miRf10201-akr osa-miRf10421-akr osa-miRf10422-akr osa-miRf10710-akr osa-miRf10855-akr osa-miRf11050-akr osa-miRf11132-akr osa-miRf11133-akr osa-miRf11213-akr osa-miRf11457-akr osa-miRf11738-akr osa-miRf12014-akr				osa-miRf11219-akr	20	LOC_Os02g49870;LOC_Os03g16470;LOC_Os03g22050;LOC_Os03g39610;LOC_Os04g09900;LOC_Os04g45970;LOC_Os05g25430;LOC_Os05g43910;LOC_Os06g06080;LOC_Os06g06490;LOC_Os06g12790;LOC_Os06g35700;LOC_Os07g49480;LOC_Os08g28710;LOC_Os08g38480;LOC_Os09g13440;LOC_Os10g05069;LOC_Os10g40740;LOC_Os10g42100;LOC_Os11g14570
LOC_Os09g39910	24	osa-miR819a osa-miR819b osa-miR819c osa-miR819d osa-miR819e osa-miR819f osa-miR819g osa-miR819h osa-miR819i osa-miR819j osa-miR819k osa-miRf10146-akr osa-miRf10201-akr osa-miRf10246-akr osa-miRf10290-akr osa-miRf10336-akr osa-miRf10406-akr osa-miRf10429-akr osa-miRf10692-akr osa-miRf10787-akr osa-miRf11491-akr osa-miRf11714-akr osa-miRf11955-akr osa-miRf12040-akr				osa-miRf11518-akr	20	LOC_Os01g12820;LOC_Os01g46760;LOC_Os01g66110;LOC_Os01g67510;LOC_Os02g07930;LOC_Os02g48470;LOC_Os03g02190;LOC_Os03g17140;LOC_Os03g61120;LOC_Os03g63550;LOC_Os06g04490;LOC_Os06g48680;LOC_Os06g51450;LOC_Os08g31850;LOC_Os08g32370;LOC_Os09g30160;LOC_Os09g31370;LOC_Os10g17260;LOC_Os12g01449;LOC_Os12g07720
LOC_Os11g41034	24	osa-miR1867 osa-miRf10007-akr osa-miRf10042-akr osa-miRf10052-akr osa-miRf10078-akr osa-miRf10102-akr osa-miRf10109-akr osa-miRf10196-akr osa-miRf10375-akr osa-miRf10376-akr osa-miRf10417-akr osa-miRf10444-akr osa-miRf10912-akr osa-miRf10936-akr osa-miRf11103-akr osa-miRf11298-akr osa-miRf11383-akr osa-miRf11421-akr osa-miRf11485-akr osa-miRf11761-akr osa-miRf11787-akr osa-miRf11963-akr osa-miRf1…				osa-miR809a	19	LOC_Os02g44990;LOC_Os02g55480;LOC_Os03g09880;LOC_Os03g15033;LOC_Os03g39610;LOC_Os03g50070;LOC_Os03g54130;LOC_Os04g02640;LOC_Os04g58070;LOC_Os05g41190;LOC_Os06g07914;LOC_Os06g17390;LOC_Os06g23274;LOC_Os06g33210;LOC_Os07g41060;LOC_Os09g12230;LOC_Os09g34250;LOC_Os12g32610;LOC_Os12g40920
LOC_Os02g55480	22	osa-miR809a osa-miR809b osa-miR809c osa-miR809d osa-miR809e osa-miR809f osa-miR809g osa-miR809h osa-miRf10154-akr osa-miRf10162-akr osa-miRf10173-akr osa-miRf10805-akr osa-miRf10855-akr osa-miRf11045-akr osa-miRf11050-akr osa-miRf11132-akr osa-miRf11133-akr osa-miRf11183-akr osa-miRf11457-akr osa-miRf11506-akr osa-miRf11507-akr osa-miRf11814-akr				osa-miR809b	19	LOC_Os02g44990;LOC_Os02g55480;LOC_Os03g09880;LOC_Os03g15033;LOC_Os03g39610;LOC_Os03g50070;LOC_Os03g54130;LOC_Os04g02640;LOC_Os04g58070;LOC_Os05g41190;LOC_Os06g07914;LOC_Os06g17390;LOC_Os06g23274;LOC_Os06g33210;LOC_Os07g41060;LOC_Os09g12230;LOC_Os09g34250;LOC_Os12g32610;LOC_Os12g40920
LOC_Os06g06080	22	osa-miRf10155-akr osa-miRf10171-akr osa-miRf10175-akr osa-miRf10218-akr osa-miRf10401-akr osa-miRf10456-akr osa-miRf10569-akr osa-miRf10572-akr osa-miRf10603-akr osa-miRf10743-akr osa-miRf11019-akr osa-miRf11182-akr osa-miRf11212-akr osa-miRf11213-akr osa-miRf11219-akr osa-miRf11270-akr osa-miRf11605-akr osa-miRf11618-akr osa-miRf11619-akr osa-miRf11738-akr osa-miRf12023-akr osa-miRf12036-akr				osa-miR809c	19	LOC_Os02g44990;LOC_Os02g55480;LOC_Os03g09880;LOC_Os03g15033;LOC_Os03g39610;LOC_Os03g50070;LOC_Os03g54130;LOC_Os04g02640;LOC_Os04g58070;LOC_Os05g41190;LOC_Os06g07914;LOC_Os06g17390;LOC_Os06g23274;LOC_Os06g33210;LOC_Os07g41060;LOC_Os09g12230;LOC_Os09g34250;LOC_Os12g32610;LOC_Os12g40920
LOC_Os12g32610	22	osa-miR808 osa-miR809a osa-miR809b osa-miR809c osa-miR809d osa-miR809e osa-miR809f osa-miR809g osa-miR809h osa-miRf10154-akr osa-miRf10173-akr osa-miRf10201-akr osa-miRf10429-akr osa-miRf10805-akr osa-miRf10855-akr osa-miRf11050-akr osa-miRf11059-akr osa-miRf11132-akr osa-miRf11133-akr osa-miRf11457-akr osa-miRf12014-akr osa-miRf12029-akr				osa-miR809d	19	LOC_Os02g44990;LOC_Os02g55480;LOC_Os03g09880;LOC_Os03g15033;LOC_Os03g39610;LOC_Os03g50070;LOC_Os03g54130;LOC_Os04g02640;LOC_Os04g58070;LOC_Os05g41190;LOC_Os06g07914;LOC_Os06g17390;LOC_Os06g23274;LOC_Os06g33210;LOC_Os07g41060;LOC_Os09g12230;LOC_Os09g34250;LOC_Os12g32610;LOC_Os12g40920
LOC_Os01g69830	21	osa-miR156a osa-miR156b osa-miR156c osa-miR156d osa-miR156e osa-miR156f osa-miR156g osa-miR156h osa-miR156i osa-miR156j osa-miR156k osa-miR156l osa-miR156m osa-miR156n osa-miR156o osa-miR156p osa-miR156q osa-miR156r osa-miR529b osa-miRf10783-akr osa-miRf12092-akr				osa-miR809e	19	LOC_Os02g44990;LOC_Os02g55480;LOC_Os03g09880;LOC_Os03g15033;LOC_Os03g39610;LOC_Os03g50070;LOC_Os03g54130;LOC_Os04g02640;LOC_Os04g58070;LOC_Os05g41190;LOC_Os06g07914;LOC_Os06g17390;LOC_Os06g23274;LOC_Os06g33210;LOC_Os07g41060;LOC_Os09g12230;LOC_Os09g34250;LOC_Os12g32610;LOC_Os12g40920
LOC_Os03g44200	21	osa-miR1436 osa-miR441a osa-miR441b osa-miR441c osa-miR446 osa-miRf10154-akr osa-miRf10173-akr osa-miRf10201-akr osa-miRf10336-akr osa-miRf10406-akr osa-miRf10429-akr osa-miRf10805-akr osa-miRf10855-akr osa-miRf11050-akr osa-miRf11132-akr osa-miRf11133-akr osa-miRf11457-akr osa-miRf11714-akr osa-miRf12014-akr osa-miRf12015-akr osa-miRf12016-akr				osa-miR809f	19	LOC_Os02g44990;LOC_Os02g55480;LOC_Os03g09880;LOC_Os03g15033;LOC_Os03g39610;LOC_Os03g50070;LOC_Os03g54130;LOC_Os04g02640;LOC_Os04g58070;LOC_Os05g41190;LOC_Os06g07914;LOC_Os06g17390;LOC_Os06g23274;LOC_Os06g33210;LOC_Os07g41060;LOC_Os09g12230;LOC_Os09g34250;LOC_Os12g32610;LOC_Os12g40920
LOC_Os06g17390	21	osa-miR446 osa-miR808 osa-miR809a osa-miR809b osa-miR809c osa-miR809d osa-miR809e osa-miR809f osa-miR809g osa-miR809h osa-miRf10146-akr osa-miRf10154-akr osa-miRf10173-akr osa-miRf10201-akr osa-miRf10429-akr osa-miRf10805-akr osa-miRf10855-akr osa-miRf11025-akr osa-miRf11132-akr osa-miRf11133-akr osa-miRf11457-akr				osa-miR809g	19	LOC_Os02g44990;LOC_Os02g55480;LOC_Os03g09880;LOC_Os03g15033;LOC_Os03g39610;LOC_Os03g50070;LOC_Os03g54130;LOC_Os04g02640;LOC_Os04g58070;LOC_Os05g41190;LOC_Os06g07914;LOC_Os06g17390;LOC_Os06g23274;LOC_Os06g33210;LOC_Os07g41060;LOC_Os09g12230;LOC_Os09g34250;LOC_Os12g32610;LOC_Os12g40920
LOC_Os07g06980	21	osa-miRf10215-akr osa-miRf10216-akr osa-miRf10309-akr osa-miRf10313-akr osa-miRf10358-akr osa-miRf10359-akr osa-miRf10472-akr osa-miRf10594-akr osa-miRf10635-akr osa-miRf10816-akr osa-miRf11027-akr osa-miRf11032-akr osa-miRf11157-akr osa-miRf11164-akr osa-miRf11262-akr osa-miRf11365-akr osa-miRf11558-akr osa-miRf11573-akr osa-miRf11586-akr osa-miRf11699-akr osa-miRf11712-akr				osa-miR809h	19	LOC_Os02g44990;LOC_Os02g55480;LOC_Os03g09880;LOC_Os03g15033;LOC_Os03g39610;LOC_Os03g50070;LOC_Os03g54130;LOC_Os04g02640;LOC_Os04g58070;LOC_Os05g41190;LOC_Os06g07914;LOC_Os06g17390;LOC_Os06g23274;LOC_Os06g33210;LOC_Os07g41060;LOC_Os09g12230;LOC_Os09g34250;LOC_Os12g32610;LOC_Os12g40920
LOC_Os03g09880	20	osa-miR808 osa-miR809a osa-miR809b osa-miR809c osa-miR809d osa-miR809e osa-miR809f osa-miR809g osa-miR809h osa-miRf10065-akr osa-miRf10146-akr osa-miRf10154-akr osa-miRf10173-akr osa-miRf10201-akr osa-miRf10805-akr osa-miRf10855-akr osa-miRf11050-akr osa-miRf11132-akr osa-miRf11133-akr osa-miRf11457-akr				osa-miR1436	19	LOC_Os01g12820;LOC_Os01g63060;LOC_Os02g44990;LOC_Os03g05200;LOC_Os03g39610;LOC_Os03g44200;LOC_Os04g58070;LOC_Os05g43570;LOC_Os05g50570;LOC_Os06g07914;LOC_Os06g23274;LOC_Os06g39330;LOC_Os08g28710;LOC_Os09g12230;LOC_Os09g34250;LOC_Os09g39960;LOC_Os10g01080;LOC_Os11g14390;LOC_Os12g31860
LOC_Os03g52010	20	osa-miR441a osa-miR441b osa-miR441c osa-miR446 osa-miRf10154-akr osa-miRf10173-akr osa-miRf10336-akr osa-miRf10805-akr osa-miRf10855-akr osa-miRf11050-akr osa-miRf11098-akr osa-miRf11102-akr osa-miRf11106-akr osa-miRf11132-akr osa-miRf11133-akr osa-miRf11457-akr osa-miRf11714-akr osa-miRf12014-akr osa-miRf12015-akr osa-miRf12016-akr				osa-miRf10819-akr	19	LOC_Os01g44120;LOC_Os01g72790;LOC_Os02g07060;LOC_Os02g32540;LOC_Os02g45600;LOC_Os02g50730;LOC_Os03g19452;LOC_Os04g34230;LOC_Os04g35240;LOC_Os04g56790;LOC_Os05g04500;LOC_Os05g06890;LOC_Os06g21480;LOC_Os07g41160;LOC_Os08g06380;LOC_Os09g09930;LOC_Os10g35630;LOC_Os10g37480;LOC_Os11g34450
LOC_Os10g40740	20	osa-miRf10151-akr osa-miRf10394-akr osa-miRf10401-akr osa-miRf10429-akr osa-miRf10443-akr osa-miRf10569-akr osa-miRf10572-akr osa-miRf10710-akr osa-miRf11044-akr osa-miRf11212-akr osa-miRf11213-akr osa-miRf11219-akr osa-miRf11603-akr osa-miRf11605-akr osa-miRf11612-akr osa-miRf11618-akr osa-miRf11738-akr osa-miRf11808-akr osa-miRf11952-akr osa-miRf12040-akr				osa-miRf11341-akr	19	LOC_Os01g08780;LOC_Os01g15039;LOC_Os01g18744;LOC_Os02g10120;LOC_Os02g44040;LOC_Os02g49870;LOC_Os03g18370;LOC_Os05g31140;LOC_Os05g35060;LOC_Os06g14810;LOC_Os06g15400;LOC_Os07g33620;LOC_Os07g45080;LOC_Os08g06630;LOC_Os08g31090;LOC_Os09g11480;LOC_Os09g20480;LOC_Os10g41310;LOC_Os12g39310
LOC_Os11g13750	20	osa-miRf10215-akr osa-miRf10216-akr osa-miRf10309-akr osa-miRf10357-akr osa-miRf10358-akr osa-miRf10359-akr osa-miRf10472-akr osa-miRf10594-akr osa-miRf10635-akr osa-miRf10816-akr osa-miRf11027-akr osa-miRf11032-akr osa-miRf11157-akr osa-miRf11262-akr osa-miRf11365-akr osa-miRf11435-akr osa-miRf11558-akr osa-miRf11573-akr osa-miRf11586-akr osa-miRf11750-akr				osa-miR808	18	LOC_Os01g16330;LOC_Os02g44990;LOC_Os03g09880;LOC_Os03g15033;LOC_Os03g39610;LOC_Os03g50070;LOC_Os03g54130;LOC_Os04g02640;LOC_Os04g58070;LOC_Os05g41190;LOC_Os06g07914;LOC_Os06g17390;LOC_Os06g23274;LOC_Os07g41060;LOC_Os09g12230;LOC_Os09g34250;LOC_Os12g32610;LOC_Os12g40920
LOC_Os05g19630	19	osa-miR1848 osa-miRf10522-akr osa-miRf10534-akr osa-miRf10627-akr osa-miRf10633-akr osa-miRf10717-akr osa-miRf10927-akr osa-miRf10964-akr osa-miRf10983-akr osa-miRf11071-akr osa-miRf11101-akr osa-miRf11124-akr osa-miRf11175-akr osa-miRf11226-akr osa-miRf11403-akr osa-miRf11411-akr osa-miRf11594-akr osa-miRf11866-akr osa-miRf12066-akr				osa-miRf10146-akr	18	LOC_Os01g66960;LOC_Os02g44990;LOC_Os03g09880;LOC_Os03g14050;LOC_Os03g15033;LOC_Os03g50070;LOC_Os04g02640;LOC_Os04g58070;LOC_Os05g41190;LOC_Os05g50570;LOC_Os06g08080;LOC_Os06g17390;LOC_Os06g23274;LOC_Os07g41060;LOC_Os09g12230;LOC_Os09g30140;LOC_Os09g39910;LOC_Os12g40920
LOC_Os06g35160	19	osa-miRf10120-akr osa-miRf10215-akr osa-miRf10216-akr osa-miRf10260-akr osa-miRf10309-akr osa-miRf10359-akr osa-miRf10472-akr osa-miRf10594-akr osa-miRf10635-akr osa-miRf10747-akr osa-miRf10816-akr osa-miRf11027-akr osa-miRf11157-akr osa-miRf11262-akr osa-miRf11365-akr osa-miRf11558-akr osa-miRf11699-akr osa-miRf11712-akr osa-miRf11813-akr				osa-miRf10185-akr	18	LOC_Os01g62870;LOC_Os02g02560;LOC_Os02g33500;LOC_Os02g57210;LOC_Os03g11370;LOC_Os05g31620;LOC_Os06g19400;LOC_Os07g07990;LOC_Os08g02700;LOC_Os08g06380;LOC_Os08g34170;LOC_Os08g41440;LOC_Os09g26960;LOC_Os09g31502;LOC_Os09g35030;LOC_Os11g28104;LOC_Os11g37900;LOC_Os12g04360
LOC_Os09g34250	19	osa-miR1436 osa-miR808 osa-miR809a osa-miR809b osa-miR809c osa-miR809d osa-miR809e osa-miR809f osa-miR809g osa-miR809h osa-miRf10154-akr osa-miRf10173-akr osa-miRf10201-akr osa-miRf10805-akr osa-miRf10855-akr osa-miRf11050-akr osa-miRf11132-akr osa-miRf11133-akr osa-miRf11457-akr				osa-miRf10336-akr	18	LOC_Os01g66960;LOC_Os02g44990;LOC_Os03g15033;LOC_Os03g31180;LOC_Os03g39610;LOC_Os03g44200;LOC_Os03g50070;LOC_Os03g52010;LOC_Os04g02640;LOC_Os04g58070;LOC_Os05g13940;LOC_Os05g41190;LOC_Os06g07914;LOC_Os09g12230;LOC_Os09g30140;LOC_Os09g39910;LOC_Os12g31860;LOC_Os12g40920
LOC_Os01g66960	18	osa-miRf10146-akr osa-miRf10173-akr osa-miRf10246-akr osa-miRf10336-akr osa-miRf10692-akr osa-miRf10762-akr osa-miRf10787-akr osa-miRf10855-akr osa-miRf10985-akr osa-miRf11042-akr osa-miRf11043-akr osa-miRf11050-akr osa-miRf11132-akr osa-miRf11133-akr osa-miRf11308-akr osa-miRf11457-akr osa-miRf11714-akr osa-miRf11955-akr				osa-miRf10572-akr	18	LOC_Os01g12820;LOC_Os03g16470;LOC_Os03g22050;LOC_Os03g29970;LOC_Os03g39610;LOC_Os04g45970;LOC_Os05g25430;LOC_Os05g39310;LOC_Os06g06080;LOC_Os06g06490;LOC_Os06g12790;LOC_Os06g35700;LOC_Os07g49480;LOC_Os08g28710;LOC_Os09g13440;LOC_Os10g05069;LOC_Os10g40740;LOC_Os10g42100
LOC_Os03g31180	18	osa-miR819a osa-miR819b osa-miR819c osa-miR819d osa-miR819e osa-miR819f osa-miR819g osa-miR819h osa-miR819i osa-miR819j osa-miR819k osa-miRf10246-akr osa-miRf10336-akr osa-miRf10692-akr osa-miRf10787-akr osa-miRf11714-akr osa-miRf11955-akr osa-miRf11996-akr				osa-miRf11605-akr	18	LOC_Os01g12820;LOC_Os03g16470;LOC_Os03g22050;LOC_Os03g29970;LOC_Os04g32540;LOC_Os05g25430;LOC_Os05g43910;LOC_Os06g06080;LOC_Os06g06490;LOC_Os06g12790;LOC_Os06g35700;LOC_Os06g48030;LOC_Os07g49480;LOC_Os08g38480;LOC_Os09g13440;LOC_Os10g05069;LOC_Os10g40740;LOC_Os12g12470
LOC_Os06g06490	18	osa-miRf10155-akr osa-miRf10218-akr osa-miRf10401-akr osa-miRf10443-akr osa-miRf10572-akr osa-miRf10830-akr osa-miRf11212-akr osa-miRf11213-akr osa-miRf11218-akr osa-miRf11219-akr osa-miRf11270-akr osa-miRf11603-akr osa-miRf11604-akr osa-miRf11605-akr osa-miRf11618-akr osa-miRf11619-akr osa-miRf11624-akr osa-miRf11738-akr				osa-miRf12040-akr	18	LOC_Os01g12820;LOC_Os03g16470;LOC_Os03g22050;LOC_Os03g29970;LOC_Os04g45970;LOC_Os05g25430;LOC_Os05g39310;LOC_Os06g12790;LOC_Os06g48030;LOC_Os07g49480;LOC_Os08g28710;LOC_Os09g13440;LOC_Os09g30140;LOC_Os09g39910;LOC_Os10g05069;LOC_Os10g40740;LOC_Os11g42970;LOC_Os12g12470
LOC_Os08g38480	18	osa-miRf10099-akr osa-miRf10155-akr osa-miRf10603-akr osa-miRf10735-akr osa-miRf11019-akr osa-miRf11212-akr osa-miRf11213-akr osa-miRf11216-akr osa-miRf11219-akr osa-miRf11270-akr osa-miRf11316-akr osa-miRf11603-akr osa-miRf11604-akr osa-miRf11605-akr osa-miRf11612-akr osa-miRf11618-akr osa-miRf11738-akr osa-miRf11808-akr				osa-miRf10319-akr	17	LOC_Os01g45274;LOC_Os01g71624;LOC_Os02g45054;LOC_Os02g47810;LOC_Os03g01700;LOC_Os03g10620;LOC_Os03g12530;LOC_Os03g50070;LOC_Os04g57200;LOC_Os05g28520;LOC_Os05g29790;LOC_Os05g46350;LOC_Os06g11290;LOC_Os07g01820;LOC_Os08g29170;LOC_Os09g39070;LOC_Os10g33540
LOC_Os12g12470	18	osa-miRf10089-akr osa-miRf10394-akr osa-miRf10416-akr osa-miRf10603-akr osa-miRf10743-akr osa-miRf11002-akr osa-miRf11090-akr osa-miRf11213-akr osa-miRf11603-akr osa-miRf11605-akr osa-miRf11612-akr osa-miRf11618-akr osa-miRf11619-akr osa-miRf11737-akr osa-miRf11738-akr osa-miRf11780-akr osa-miRf11808-akr osa-miRf12040-akr				osa-miRf10710-akr	17	LOC_Os01g12820;LOC_Os03g02460;LOC_Os03g16470;LOC_Os03g22050;LOC_Os04g09900;LOC_Os04g45970;LOC_Os05g25430;LOC_Os05g39310;LOC_Os05g43910;LOC_Os06g12790;LOC_Os07g41060;LOC_Os07g49480;LOC_Os08g28710;LOC_Os09g10340;LOC_Os09g13440;LOC_Os10g05069;LOC_Os10g40740
LOC_Os01g65130	17	osa-miRf10089-akr osa-miRf10172-akr osa-miRf10282-akr osa-miRf10416-akr osa-miRf10518-akr osa-miRf10699-akr osa-miRf10806-akr osa-miRf11000-akr osa-miRf11002-akr osa-miRf11346-akr osa-miRf11680-akr osa-miRf11681-akr osa-miRf11737-akr osa-miRf11780-akr osa-miRf11785-akr osa-miRf11894-akr osa-miRf11984-akr				osa-miRf11213-akr	17	LOC_Os01g09710;LOC_Os01g13690;LOC_Os02g50372;LOC_Os03g16470;LOC_Os03g22050;LOC_Os04g45970;LOC_Os05g25430;LOC_Os06g06080;LOC_Os06g06490;LOC_Os06g12790;LOC_Os07g41060;LOC_Os07g49480;LOC_Os08g38480;LOC_Os09g13440;LOC_Os10g40740;LOC_Os10g40824;LOC_Os12g12470
LOC_Os03g29540	17	osa-miR1884a osa-miR1884b osa-miR806a osa-miR806b osa-miR806c osa-miR806d osa-miR806e osa-miR806f osa-miR806g osa-miR806h osa-miRf10401-akr osa-miRf10429-akr osa-miRf11212-akr osa-miRf11316-akr osa-miRf11738-akr osa-miRf11952-akr osa-miRf11967-akr				osa-miRf10458-akr	16	LOC_Os02g10020;LOC_Os02g13140;LOC_Os03g05980;LOC_Os03g20870;LOC_Os03g21000;LOC_Os03g52320;LOC_Os06g06290;LOC_Os07g04110;LOC_Os07g06060;LOC_Os08g35710;LOC_Os08g41880;LOC_Os09g04160;LOC_Os09g31370;LOC_Os09g34000;LOC_Os10g33370;LOC_Os12g02250
LOC_Os03g29970	17	osa-miRf10032-akr osa-miRf10168-akr osa-miRf10490-akr osa-miRf10572-akr osa-miRf10759-akr osa-miRf10876-akr osa-miRf11003-akr osa-miRf11319-akr osa-miRf11372-akr osa-miRf11434-akr osa-miRf11503-akr osa-miRf11504-akr osa-miRf11509-akr osa-miRf11603-akr osa-miRf11605-akr osa-miRf11664-akr osa-miRf12040-akr				osa-miRf11603-akr	16	LOC_Os01g12820;LOC_Os03g02460;LOC_Os03g16470;LOC_Os03g22050;LOC_Os03g29970;LOC_Os04g45970;LOC_Os05g25430;LOC_Os05g43910;LOC_Os06g06490;LOC_Os06g12790;LOC_Os07g49480;LOC_Os08g38480;LOC_Os09g13440;LOC_Os10g05069;LOC_Os10g40740;LOC_Os12g12470
LOC_Os10g38540	17	osa-miRf10203-akr osa-miRf10684-akr osa-miRf10872-akr osa-miRf10873-akr osa-miRf10874-akr osa-miRf11009-akr osa-miRf11082-akr osa-miRf11129-akr osa-miRf11315-akr osa-miRf11360-akr osa-miRf11689-akr osa-miRf11701-akr osa-miRf11702-akr osa-miRf11805-akr osa-miRf11972-akr osa-miRf11991-akr osa-miRf11992-akr				osa-miRf10153-akr	15	LOC_Os01g12840;LOC_Os01g43080;LOC_Os01g43950;LOC_Os01g49830;LOC_Os01g54930;LOC_Os04g06910;LOC_Os04g49570;LOC_Os04g51450;LOC_Os05g04610;LOC_Os05g07940;LOC_Os05g49040;LOC_Os06g47650;LOC_Os10g32740;LOC_Os10g37340;LOC_Os11g41600
LOC_Os12g31860	17	osa-miR1436 osa-miRf10154-akr osa-miRf10173-akr osa-miRf10336-akr osa-miRf10406-akr osa-miRf10429-akr osa-miRf10805-akr osa-miRf10855-akr osa-miRf11050-akr osa-miRf11132-akr osa-miRf11133-akr osa-miRf11240-akr osa-miRf11457-akr osa-miRf11714-akr osa-miRf12014-akr osa-miRf12015-akr osa-miRf12016-akr				osa-miRf11098-akr	15	LOC_Os01g08150;LOC_Os01g11460;LOC_Os01g68560;LOC_Os02g18550;LOC_Os02g58230;LOC_Os03g52010;LOC_Os03g56070;LOC_Os03g56250;LOC_Os03g58790;LOC_Os04g58570;LOC_Os05g35266;LOC_Os07g40800;LOC_Os08g40790;LOC_Os08g41880;LOC_Os12g03070
LOC_Os02g53620	15	osa-miR169a osa-miR169b osa-miR169c osa-miR169d osa-miR169e osa-miR169f osa-miR169g osa-miR169h osa-miR169i osa-miR169j osa-miR169k osa-miR169l osa-miR169m osa-miR169n osa-miR169o				osa-miRf11102-akr	15	LOC_Os01g08150;LOC_Os01g11460;LOC_Os01g68560;LOC_Os02g18550;LOC_Os02g58230;LOC_Os03g52010;LOC_Os03g56070;LOC_Os03g56250;LOC_Os03g58790;LOC_Os04g58570;LOC_Os05g35266;LOC_Os07g40800;LOC_Os08g40790;LOC_Os08g41880;LOC_Os12g03070
LOC_Os06g48030	15	osa-miR814a osa-miR814b osa-miR814c osa-miRf10026-akr osa-miRf10089-akr osa-miRf10172-akr osa-miRf10431-akr osa-miRf10603-akr osa-miRf11147-akr osa-miRf11215-akr osa-miRf11605-akr osa-miRf11623-akr osa-miRf11737-akr osa-miRf12039-akr osa-miRf12040-akr				osa-miRf11106-akr	15	LOC_Os01g08150;LOC_Os01g11460;LOC_Os01g68560;LOC_Os02g18550;LOC_Os02g58230;LOC_Os03g52010;LOC_Os03g56070;LOC_Os03g56250;LOC_Os03g58790;LOC_Os04g58570;LOC_Os05g35266;LOC_Os07g40800;LOC_Os08g40790;LOC_Os08g41880;LOC_Os12g03070
LOC_Os08g28710	15	osa-miR1436 osa-miR1884a osa-miRf10155-akr osa-miRf10172-akr osa-miRf10218-akr osa-miRf10421-akr osa-miRf10572-akr osa-miRf10710-akr osa-miRf10735-akr osa-miRf10830-akr osa-miRf11090-akr osa-miRf11182-akr osa-miRf11219-akr osa-miRf11738-akr osa-miRf12040-akr				osa-miRf11390-akr	15	LOC_Os01g01340;LOC_Os01g40094;LOC_Os01g43040;LOC_Os02g01210;LOC_Os03g07480;LOC_Os03g40830;LOC_Os04g35060;LOC_Os04g37490;LOC_Os05g02750;LOC_Os08g42440;LOC_Os10g30150;LOC_Os11g09020;LOC_Os12g15470;LOC_Os12g22120;LOC_Os12g37840
LOC_Os10g05069	15	osa-miR1439 osa-miRf10099-akr osa-miRf10273-akr osa-miRf10401-akr osa-miRf10572-akr osa-miRf10710-akr osa-miRf11090-akr osa-miRf11219-akr osa-miRf11372-akr osa-miRf11603-akr osa-miRf11605-akr osa-miRf11612-akr osa-miRf11738-akr osa-miRf11952-akr osa-miRf12040-akr				osa-miRf11612-akr	15	LOC_Os01g10580;LOC_Os01g12820;LOC_Os03g16470;LOC_Os03g22050;LOC_Os04g09900;LOC_Os04g45970;LOC_Os05g25430;LOC_Os06g12790;LOC_Os07g49480;LOC_Os08g02230;LOC_Os08g38480;LOC_Os09g13440;LOC_Os10g05069;LOC_Os10g40740;LOC_Os12g12470
LOC_Os04g32540	14	osa-miR816 osa-miRf10026-akr osa-miRf10400-akr osa-miRf10406-akr osa-miRf10421-akr osa-miRf10463-akr osa-miRf10473-akr osa-miRf10743-akr osa-miRf10748-akr osa-miRf11119-akr osa-miRf11605-akr osa-miRf11623-akr osa-miRf11949-akr osa-miRf12029-akr				osa-miR446	14	LOC_Os01g13150;LOC_Os02g44990;LOC_Os03g44200;LOC_Os03g50070;LOC_Os03g52010;LOC_Os04g02640;LOC_Os04g58070;LOC_Os05g41190;LOC_Os06g07914;LOC_Os06g17390;LOC_Os06g23274;LOC_Os07g41060;LOC_Os08g23870;LOC_Os09g12230
LOC_Os05g48390	14	osa-miR399a osa-miR399b osa-miR399c osa-miR399d osa-miR399e osa-miR399f osa-miR399g osa-miR399h osa-miR399i osa-miR399j osa-miR399k osa-miRf10158-akr osa-miRf10978-akr osa-miRf11073-akr				osa-miRf10462-akr	14	LOC_Os01g53920;LOC_Os01g59020;LOC_Os02g52700;LOC_Os02g52710;LOC_Os03g38390;LOC_Os04g23760;LOC_Os06g24070;LOC_Os06g46500;LOC_Os07g07410;LOC_Os07g33620;LOC_Os07g44190;LOC_Os08g36860;LOC_Os09g39940;LOC_Os11g38030
LOC_Os06g08080	14	osa-miRf10146-akr osa-miRf10201-akr osa-miRf10406-akr osa-miRf10761-akr osa-miRf10762-akr osa-miRf10985-akr osa-miRf11042-akr osa-miRf11043-akr osa-miRf11245-akr osa-miRf11249-akr osa-miRf11308-akr osa-miRf11491-akr osa-miRf11816-akr osa-miRf11847-akr				osa-miRf11212-akr	14	LOC_Os03g16470;LOC_Os03g22050;LOC_Os03g29540;LOC_Os03g52280;LOC_Os04g09900;LOC_Os05g25430;LOC_Os06g06080;LOC_Os06g06490;LOC_Os06g12790;LOC_Os07g49480;LOC_Os08g02230;LOC_Os08g38480;LOC_Os09g13440;LOC_Os10g40740
LOC_Os03g07880	13	osa-miR169a osa-miR169b osa-miR169c osa-miR169d osa-miR169e osa-miR169f osa-miR169g osa-miR169h osa-miR169i osa-miR169j osa-miR169k osa-miR169l osa-miR169m				osa-miRf11613-akr	14	LOC_Os01g22990;LOC_Os01g40150;LOC_Os02g53810;LOC_Os02g57210;LOC_Os02g57720;LOC_Os03g21720;LOC_Os04g35490;LOC_Os04g54800;LOC_Os05g43040;LOC_Os06g40640;LOC_Os07g34640;LOC_Os09g15680;LOC_Os09g27750;LOC_Os10g37760
LOC_Os03g29760	13	osa-miR169a osa-miR169b osa-miR169c osa-miR169d osa-miR169e osa-miR169f osa-miR169g osa-miR169h osa-miR169i osa-miR169j osa-miR169k osa-miR169l osa-miR169m				osa-miRf11714-akr	14	LOC_Os01g66960;LOC_Os03g15033;LOC_Os03g31180;LOC_Os03g39610;LOC_Os03g44200;LOC_Os03g52010;LOC_Os04g02640;LOC_Os05g13940;LOC_Os06g24704;LOC_Os09g12230;LOC_Os09g30140;LOC_Os09g39910;LOC_Os12g31860;LOC_Os12g40920
LOC_Os03g54130	13	osa-miR808 osa-miR809a osa-miR809b osa-miR809c osa-miR809d osa-miR809e osa-miR809f osa-miR809g osa-miR809h osa-miRf10201-akr osa-miRf10429-akr osa-miRf10805-akr osa-miRf12014-akr				osa-miRf12016-akr	14	LOC_Os02g44990;LOC_Os03g39610;LOC_Os03g44200;LOC_Os03g50070;LOC_Os03g52010;LOC_Os04g02620;LOC_Os04g02640;LOC_Os05g13940;LOC_Os06g06560;LOC_Os06g07914;LOC_Os06g23274;LOC_Os09g12230;LOC_Os12g31860;LOC_Os12g40920
LOC_Os04g02620	13	osa-miRf10154-akr osa-miRf10173-akr osa-miRf10201-akr osa-miRf10805-akr osa-miRf10855-akr osa-miRf11050-akr osa-miRf11132-akr osa-miRf11133-akr osa-miRf11457-akr osa-miRf11647-akr osa-miRf12014-akr osa-miRf12015-akr osa-miRf12016-akr				osa-miRf11618-akr	13	LOC_Os01g12820;LOC_Os02g50372;LOC_Os03g16470;LOC_Os03g22050;LOC_Os05g25430;LOC_Os06g06080;LOC_Os06g06490;LOC_Os06g12790;LOC_Os07g49480;LOC_Os08g38480;LOC_Os09g13440;LOC_Os10g40740;LOC_Os12g12470
LOC_Os04g45970	13	osa-miRf10155-akr osa-miRf10401-akr osa-miRf10572-akr osa-miRf10710-akr osa-miRf11090-akr osa-miRf11213-akr osa-miRf11219-akr osa-miRf11372-akr osa-miRf11603-akr osa-miRf11612-akr osa-miRf11738-akr osa-miRf11952-akr osa-miRf12040-akr				osa-miR1439	12	LOC_Os01g13560;LOC_Os01g48850;LOC_Os02g03750;LOC_Os02g05670;LOC_Os02g22100;LOC_Os07g42626;LOC_Os07g49480;LOC_Os08g36910;LOC_Os10g05069;LOC_Os11g14390;LOC_Os12g06200;LOC_Os12g38051
LOC_Os08g33479	13	osa-miR1861a osa-miR444a.1 osa-miR444a.2 osa-miR444b.2 osa-miR444c.2 osa-miR444d.1 osa-miR444d.2 osa-miR444e osa-miR444f osa-miRf10518-akr osa-miRf10806-akr osa-miRf11785-akr osa-miRf11990-akr				osa-miRf10401-akr	12	LOC_Os03g16470;LOC_Os03g22050;LOC_Os03g29540;LOC_Os04g45970;LOC_Os05g25430;LOC_Os06g06080;LOC_Os06g06490;LOC_Os06g12790;LOC_Os07g49480;LOC_Os09g13440;LOC_Os10g05069;LOC_Os10g40740
LOC_Os09g38090	13	osa-miR439a osa-miR439b osa-miR439c osa-miR439d osa-miR439e osa-miR439f osa-miR439g osa-miR439h osa-miR439i osa-miR439j osa-miRf11053-akr osa-miRf11086-akr osa-miRf11242-akr				osa-miR441a	11	LOC_Os02g44990;LOC_Os02g48620;LOC_Os03g44200;LOC_Os03g50070;LOC_Os03g52010;LOC_Os04g52500;LOC_Os05g41190;LOC_Os05g42350;LOC_Os06g23274;LOC_Os09g12230;LOC_Os12g37510
LOC_Os02g44360	12	osa-miR170a osa-miR170b osa-miR171a osa-miR171b osa-miR171c osa-miR171d osa-miR171e osa-miR171f osa-miR171i osa-miR171m osa-miR171n osa-miRf10461-akr				osa-miR441b	11	LOC_Os02g44990;LOC_Os02g48620;LOC_Os03g44200;LOC_Os03g50070;LOC_Os03g52010;LOC_Os04g52500;LOC_Os05g41190;LOC_Os05g42350;LOC_Os06g23274;LOC_Os09g12230;LOC_Os12g37510
LOC_Os02g44370	12	osa-miR170a osa-miR170b osa-miR171a osa-miR171b osa-miR171c osa-miR171d osa-miR171e osa-miR171f osa-miR171i osa-miR171m osa-miR171n osa-miRf10461-akr				osa-miR441c	11	LOC_Os02g44990;LOC_Os02g48620;LOC_Os03g44200;LOC_Os03g50070;LOC_Os03g52010;LOC_Os04g52500;LOC_Os05g41190;LOC_Os05g42350;LOC_Os06g23274;LOC_Os09g12230;LOC_Os12g37510
LOC_Os07g43020	12	osa-miRf10162-akr osa-miRf10723-akr osa-miRf10724-akr osa-miRf11051-akr osa-miRf11144-akr osa-miRf11243-akr osa-miRf11303-akr osa-miRf11506-akr osa-miRf11507-akr osa-miRf11675-akr osa-miRf11814-akr osa-miRf12056-akr				osa-miRf10446-akr	11	LOC_Os01g04080;LOC_Os01g18080;LOC_Os01g24050;LOC_Os02g30910;LOC_Os02g49440;LOC_Os02g55130;LOC_Os03g02020;LOC_Os03g06350;LOC_Os05g03130;LOC_Os06g41060;LOC_Os12g17490
LOC_Os09g33820	12	osa-miR156a osa-miR156b osa-miR156c osa-miR156d osa-miR156e osa-miR156f osa-miR156g osa-miR156h osa-miR156i osa-miR156j osa-miR156m osa-miR156n				osa-miRf10603-akr	11	LOC_Os01g31870;LOC_Os03g22050;LOC_Os06g06080;LOC_Os06g12790;LOC_Os06g48030;LOC_Os07g49480;LOC_Os08g38480;LOC_Os09g13440;LOC_Os10g02480;LOC_Os10g24370;LOC_Os12g12470
LOC_Os02g03750	11	osa-miR1439 osa-miR414 osa-miRf10154-akr osa-miRf10173-akr osa-miRf10604-akr osa-miRf10805-akr osa-miRf10855-akr osa-miRf11050-akr osa-miRf11132-akr osa-miRf11133-akr osa-miRf11457-akr				osa-miRf11026-akr	11	LOC_Os01g08760;LOC_Os01g50310;LOC_Os01g67890;LOC_Os03g26210;LOC_Os03g53540;LOC_Os03g54050;LOC_Os06g47860;LOC_Os07g07900;LOC_Os07g40940;LOC_Os10g35870;LOC_Os12g26030
LOC_Os02g49840	11	osa-miR444a.1 osa-miR444a.2 osa-miR444b.1 osa-miR444b.2 osa-miR444c.1 osa-miR444c.2 osa-miR444d.1 osa-miR444d.2 osa-miR444d.3 osa-miR444e osa-miR444f				osa-miRf12015-akr	11	LOC_Os03g39610;LOC_Os03g44200;LOC_Os03g52010;LOC_Os04g02620;LOC_Os04g02640;LOC_Os05g13940;LOC_Os06g07914;LOC_Os06g23274;LOC_Os09g12230;LOC_Os12g31860;LOC_Os12g40920
LOC_Os03g48970	11	osa-miR169d osa-miR169f osa-miR169g osa-miR169h osa-miR169i osa-miR169j osa-miR169k osa-miR169l osa-miR169m osa-miR169n osa-miR169o				osa-miR2102-5p	10	LOC_Os02g52670;LOC_Os05g03520;LOC_Os05g51650;LOC_Os07g37850;LOC_Os08g03990;LOC_Os08g34330;LOC_Os08g40180;LOC_Os09g38340;LOC_Os11g40600;LOC_Os12g06850
LOC_Os05g50570	11	osa-miR1436 osa-miRf10146-akr osa-miRf10173-akr osa-miRf10855-akr osa-miRf10985-akr osa-miRf11050-akr osa-miRf11132-akr osa-miRf11133-akr osa-miRf11308-akr osa-miRf11457-akr osa-miRf11491-akr				osa-miRf10060-akr	10	LOC_Os01g65790;LOC_Os01g70770;LOC_Os03g60260;LOC_Os05g39350;LOC_Os06g04150;LOC_Os08g20570;LOC_Os09g26144;LOC_Os11g18044;LOC_Os11g32650;LOC_Os12g03370
LOC_Os06g06560	11	osa-miRf10154-akr osa-miRf10173-akr osa-miRf10429-akr osa-miRf10805-akr osa-miRf10855-akr osa-miRf11050-akr osa-miRf11132-akr osa-miRf11133-akr osa-miRf11457-akr osa-miRf12014-akr osa-miRf12016-akr				osa-miRf10155-akr	10	LOC_Os03g16470;LOC_Os03g22050;LOC_Os04g45970;LOC_Os06g06080;LOC_Os06g06490;LOC_Os06g12790;LOC_Os07g49480;LOC_Os08g28710;LOC_Os08g38480;LOC_Os09g13440
LOC_Os06g39330	11	osa-miR1436 osa-miR818a osa-miR818b osa-miR818c osa-miR818d osa-miR818e osa-miRf10207-akr osa-miRf10212-akr osa-miRf10406-akr osa-miRf11059-akr osa-miRf11060-akr				osa-miRf10632-akr	10	LOC_Os01g17160;LOC_Os02g56250;LOC_Os04g55920;LOC_Os05g35400;LOC_Os09g28580;LOC_Os09g31300;LOC_Os10g35870;LOC_Os12g38250;LOC_Os12g40900;LOC_Os12g43660
LOC_Os07g25700	11	osa-miRf10194-akr osa-miRf10240-akr osa-miRf10437-akr osa-miRf10518-akr osa-miRf10806-akr osa-miRf10940-akr osa-miRf11680-akr osa-miRf11785-akr osa-miRf11990-akr osa-miRf12034-akr osa-miRf12089-akr				osa-miRf11495-akr	10	LOC_Os01g31610;LOC_Os01g69970;LOC_Os02g37700;LOC_Os05g11990;LOC_Os06g50300;LOC_Os07g09420;LOC_Os09g25090;LOC_Os09g32964;LOC_Os09g36200;LOC_Os12g19381
LOC_Os08g09250	11	osa-miR1861a osa-miR1861c osa-miRf10129-akr osa-miRf10538-akr osa-miRf10608-akr osa-miRf10647-akr osa-miRf10920-akr osa-miRf11272-akr osa-miRf11625-akr osa-miRf11801-akr osa-miRf11966-akr				osa-miRf11952-akr	10	LOC_Os03g16470;LOC_Os03g22050;LOC_Os03g29540;LOC_Os04g45970;LOC_Os05g25430;LOC_Os06g12790;LOC_Os07g49480;LOC_Os09g13440;LOC_Os10g05069;LOC_Os10g40740
LOC_Os01g43480	10	osa-miRf10202-akr osa-miRf10820-akr osa-miRf10874-akr osa-miRf11009-akr osa-miRf11688-akr osa-miRf11791-akr osa-miRf11972-akr osa-miRf11991-akr osa-miRf11992-akr osa-miRf11993-akr				osa-miRf12007-akr	10	LOC_Os01g50700;LOC_Os01g69070;LOC_Os02g21750;LOC_Os03g12690;LOC_Os05g25540;LOC_Os06g06780;LOC_Os06g44200;LOC_Os10g20470;LOC_Os10g33170;LOC_Os12g32920
LOC_Os03g14050	10	osa-miRf10146-akr osa-miRf10154-akr osa-miRf10173-akr osa-miRf10805-akr osa-miRf10855-akr osa-miRf11050-akr osa-miRf11132-akr osa-miRf11133-akr osa-miRf11457-akr osa-miRf11491-akr				osa-miR529b	9	LOC_Os01g65780;LOC_Os01g69830;LOC_Os02g35910;LOC_Os02g53200;LOC_Os04g28420;LOC_Os04g51830;LOC_Os05g07090;LOC_Os09g25900;LOC_Os12g08760
LOC_Os04g33860	10	osa-miR399a osa-miR399b osa-miR399c osa-miR399d osa-miR399e osa-miR399f osa-miR399g osa-miR399h osa-miR399j osa-miRf10978-akr				osa-miR818a	9	LOC_Os01g12820;LOC_Os01g51890;LOC_Os01g72370;LOC_Os05g03610;LOC_Os05g43570;LOC_Os06g39330;LOC_Os06g48060;LOC_Os07g48370;LOC_Os10g42100
LOC_Os05g15330	10	osa-miRf11223-akr osa-miRf11282-akr osa-miRf11444-akr osa-miRf11694-akr osa-miRf11695-akr osa-miRf11901-akr osa-miRf11930-akr osa-miRf11999-akr osa-miRf12050-akr osa-miRf12079-akr				osa-miR818b	9	LOC_Os01g12820;LOC_Os01g51890;LOC_Os01g72370;LOC_Os05g03610;LOC_Os05g43570;LOC_Os06g39330;LOC_Os06g48060;LOC_Os07g48370;LOC_Os10g42100
LOC_Os05g43570	10	osa-miR1436 osa-miR818a osa-miR818b osa-miR818c osa-miR818d osa-miR818e osa-miRf10406-akr osa-miRf11059-akr osa-miRf11060-akr osa-miRf11090-akr				osa-miR818c	9	LOC_Os01g12820;LOC_Os01g51890;LOC_Os01g72370;LOC_Os05g03610;LOC_Os05g43570;LOC_Os06g39330;LOC_Os06g48060;LOC_Os07g48370;LOC_Os10g42100
LOC_Os08g07840	10	osa-miRf10114-akr osa-miRf10263-akr osa-miRf10498-akr osa-miRf11225-akr osa-miRf11307-akr osa-miRf11490-akr osa-miRf11525-akr osa-miRf11635-akr osa-miRf11679-akr osa-miRf12060-akr				osa-miR818d	9	LOC_Os01g12820;LOC_Os01g51890;LOC_Os01g72370;LOC_Os05g03610;LOC_Os05g43570;LOC_Os06g39330;LOC_Os06g48060;LOC_Os07g48370;LOC_Os10g42100
LOC_Os09g38330	10	osa-miR170a osa-miR170b osa-miR171b osa-miR171c osa-miR171d osa-miR171e osa-miR171f osa-miR171m osa-miR171n osa-miR399h				osa-miR818e	9	LOC_Os01g12820;LOC_Os01g51890;LOC_Os01g72370;LOC_Os05g03610;LOC_Os05g43570;LOC_Os06g39330;LOC_Os06g48060;LOC_Os07g48370;LOC_Os10g42100
LOC_Os10g35470	10	osa-miRf10007-akr osa-miRf10042-akr osa-miRf10052-akr osa-miRf10078-akr osa-miRf10102-akr osa-miRf10196-akr osa-miRf10375-akr osa-miRf10444-akr osa-miRf11485-akr osa-miRf11787-akr				osa-miRf10172-akr	9	LOC_Os01g08460;LOC_Os01g59100;LOC_Os01g65130;LOC_Os05g03610;LOC_Os05g07940;LOC_Os06g48030;LOC_Os07g42730;LOC_Os08g28710;LOC_Os11g02400
LOC_Os10g38040	10	osa-miR1440 osa-miRf10179-akr osa-miRf10640-akr osa-miRf10642-akr osa-miRf10653-akr osa-miRf10655-akr osa-miRf10711-akr osa-miRf11628-akr osa-miRf11730-akr osa-miRf11731-akr				osa-miRf10261-akr	9	LOC_Os01g69030;LOC_Os02g03040;LOC_Os04g11040;LOC_Os04g43290;LOC_Os05g05600;LOC_Os06g45940;LOC_Os06g48180;LOC_Os10g25030;LOC_Os10g31680
LOC_Os12g37510	10	osa-miR441a osa-miR441b osa-miR441c osa-miRf10154-akr osa-miRf10429-akr osa-miRf10805-akr osa-miRf10855-akr osa-miRf11050-akr osa-miRf11132-akr osa-miRf11133-akr				osa-miRf10496-akr	9	LOC_Os01g70490;LOC_Os02g08410;LOC_Os03g53860;LOC_Os04g49757;LOC_Os05g11610;LOC_Os08g16050;LOC_Os08g34700;LOC_Os09g25760;LOC_Os11g05760
LOC_Os03g58790	9	osa-miR444a.2 osa-miR444d.2 osa-miR444e osa-miRf10223-akr osa-miRf10273-akr osa-miRf11098-akr osa-miRf11102-akr osa-miRf11106-akr osa-miRf11354-akr				osa-miRf10806-akr	9	LOC_Os01g37630;LOC_Os01g65130;LOC_Os01g70770;LOC_Os06g05420;LOC_Os07g08810;LOC_Os07g25700;LOC_Os08g33479;LOC_Os10g14920;LOC_Os10g35370
LOC_Os05g03610	9	osa-miR818a osa-miR818b osa-miR818c osa-miR818d osa-miR818e osa-miRf10151-akr osa-miRf10172-akr osa-miRf11044-akr osa-miRf11090-akr				osa-miRf11051-akr	9	LOC_Os01g14100;LOC_Os02g13800;LOC_Os04g35380;LOC_Os04g45750;LOC_Os06g23274;LOC_Os07g43020;LOC_Os08g33710;LOC_Os11g32260;LOC_Os12g39320
LOC_Os05g43910	9	osa-miRf10179-akr osa-miRf10710-akr osa-miRf10809-akr osa-miRf11218-akr osa-miRf11219-akr osa-miRf11603-akr osa-miRf11604-akr osa-miRf11605-akr osa-miRf12053-akr				osa-miRf11059-akr	9	LOC_Os01g12820;LOC_Os01g51890;LOC_Os05g25430;LOC_Os05g43570;LOC_Os06g39330;LOC_Os07g43390;LOC_Os09g29210;LOC_Os10g42100;LOC_Os12g32610
LOC_Os06g33210	9	osa-miR809a osa-miR809b osa-miR809c osa-miR809d osa-miR809e osa-miR809f osa-miR809g osa-miR809h osa-miRf10273-akr				osa-miRf11095-akr	9	LOC_Os01g47560;LOC_Os01g71330;LOC_Os02g15860;LOC_Os03g39020;LOC_Os04g57760;LOC_Os05g05830;LOC_Os05g35440;LOC_Os07g48550;LOC_Os09g28510
LOC_Os06g36560	9	osa-miRf10219-akr osa-miRf10575-akr osa-miRf10737-akr osa-miRf10899-akr osa-miRf10900-akr osa-miRf11171-akr osa-miRf11179-akr osa-miRf11777-akr osa-miRf11778-akr				osa-miRf11270-akr	9	LOC_Os01g09710;LOC_Os03g16470;LOC_Os03g22050;LOC_Os06g06080;LOC_Os06g06490;LOC_Os06g12790;LOC_Os07g49480;LOC_Os08g38480;LOC_Os10g40824
LOC_Os07g09580	9	osa-miR1882a osa-miR1882b osa-miR1882c osa-miR1882d osa-miR1882e osa-miR1882f osa-miR1882g osa-miR1882h osa-miR414				osa-miRf11513-akr	9	LOC_Os01g67300;LOC_Os01g68730;LOC_Os02g56600;LOC_Os03g07200;LOC_Os03g11660;LOC_Os04g09390;LOC_Os07g10410;LOC_Os07g49230;LOC_Os09g02729
LOC_Os07g39310	9	osa-miR166a osa-miR166b osa-miR166c osa-miR166d osa-miR166f osa-miR166m osa-miR166n osa-miRf10256-akr osa-miRf11831-akr				osa-miRf11604-akr	9	LOC_Os03g16470;LOC_Os03g22050;LOC_Os05g25430;LOC_Os05g43910;LOC_Os06g06490;LOC_Os06g12790;LOC_Os07g49480;LOC_Os08g38480;LOC_Os09g13440
LOC_Os08g10080	9	osa-miR164a osa-miR164b osa-miR164c osa-miR164d osa-miR164e osa-miR164f osa-miRf10223-akr osa-miRf10272-akr osa-miRf10273-akr				osa-miRf11773-akr	9	LOC_Os02g33890;LOC_Os03g23980;LOC_Os03g52840;LOC_Os03g62610;LOC_Os04g54810;LOC_Os05g07820;LOC_Os05g37060;LOC_Os06g01360;LOC_Os09g04160
LOC_Os09g39960	9	osa-miR1436 osa-miRf10154-akr osa-miRf10173-akr osa-miRf10805-akr osa-miRf10855-akr osa-miRf11050-akr osa-miRf11132-akr osa-miRf11133-akr osa-miRf11457-akr				osa-miRf11774-akr	9	LOC_Os01g50930;LOC_Os01g59870;LOC_Os02g33890;LOC_Os02g43280;LOC_Os02g54240;LOC_Os05g07820;LOC_Os06g01360;LOC_Os06g02000;LOC_Os10g10870
LOC_Os10g42100	9	osa-miR818a osa-miR818b osa-miR818c osa-miR818d osa-miR818e osa-miRf10572-akr osa-miRf11059-akr osa-miRf11219-akr osa-miRf12029-akr				osa-miRf11996-akr	9	LOC_Os01g48850;LOC_Os02g51070;LOC_Os03g01570;LOC_Os03g15033;LOC_Os03g27830;LOC_Os03g31180;LOC_Os07g41070;LOC_Os09g13440;LOC_Os12g40920
LOC_Os01g48850	8	osa-miR1439 osa-miR159a osa-miR159b osa-miR159f osa-miR159m osa-miRf10173-akr osa-miRf10855-akr osa-miRf11996-akr				osa-miR531b	8	LOC_Os02g45520;LOC_Os03g56869;LOC_Os03g58010;LOC_Os04g21340;LOC_Os04g55240;LOC_Os05g49940;LOC_Os06g40880;LOC_Os08g02700
LOC_Os01g53920	8	osa-miRf10025-akr osa-miRf10400-akr osa-miRf10462-akr osa-miRf10473-akr osa-miRf10794-akr osa-miRf10835-akr osa-miRf11073-akr osa-miRf11424-akr				osa-miR815a	8	LOC_Os01g42380;LOC_Os03g06760;LOC_Os03g07920;LOC_Os05g40910;LOC_Os06g04070;LOC_Os06g43210;LOC_Os08g36320;LOC_Os12g42070
LOC_Os01g72370	8	osa-miR437 osa-miR818a osa-miR818b osa-miR818c osa-miR818d osa-miR818e osa-miRf10212-akr osa-miRf10429-akr				osa-miR815b	8	LOC_Os01g42380;LOC_Os03g06760;LOC_Os03g07920;LOC_Os05g40910;LOC_Os06g04070;LOC_Os06g43210;LOC_Os08g36320;LOC_Os12g42070
LOC_Os05g43880	8	osa-miRf10795-akr osa-miRf11081-akr osa-miRf11391-akr osa-miRf11561-akr osa-miRf11678-akr osa-miRf12046-akr osa-miRf12051-akr osa-miRf12052-akr				osa-miR815c	8	LOC_Os01g42380;LOC_Os03g06760;LOC_Os03g07920;LOC_Os05g40910;LOC_Os06g04070;LOC_Os06g43210;LOC_Os08g36320;LOC_Os12g42070
LOC_Os06g35700	8	osa-miRf10572-akr osa-miRf10810-akr osa-miRf10830-akr osa-miRf11182-akr osa-miRf11218-akr osa-miRf11219-akr osa-miRf11605-akr osa-miRf12035-akr				osa-miRf10144-akr	8	LOC_Os01g05610;LOC_Os01g05900;LOC_Os01g05950;LOC_Os01g05990;LOC_Os05g12474;LOC_Os05g50600;LOC_Os08g38300;LOC_Os11g25160
LOC_Os06g48060	8	osa-miR818a osa-miR818b osa-miR818c osa-miR818d osa-miR818e osa-miRf10406-akr osa-miRf10842-akr osa-miRf11090-akr				osa-miRf10179-akr	8	LOC_Os03g02460;LOC_Os03g16470;LOC_Os03g22050;LOC_Os05g25430;LOC_Os05g40200;LOC_Os05g43910;LOC_Os06g12790;LOC_Os10g38040
LOC_Os01g01340	7	osa-miRf10214-akr osa-miRf10256-akr osa-miRf10292-akr osa-miRf10777-akr osa-miRf11390-akr osa-miRf11838-akr osa-miRf11895-akr				osa-miRf10218-akr	8	LOC_Os03g22050;LOC_Os06g06080;LOC_Os06g06490;LOC_Os06g23274;LOC_Os07g49480;LOC_Os08g28710;LOC_Os09g07154;LOC_Os09g13440
LOC_Os01g14100	7	osa-miRf10162-akr osa-miRf11041-akr osa-miRf11051-akr osa-miRf11682-akr osa-miRf11693-akr osa-miRf11781-akr osa-miRf12024-akr				osa-miRf10481-akr	8	LOC_Os01g10870;LOC_Os03g45340;LOC_Os05g50550;LOC_Os06g15330;LOC_Os06g40170;LOC_Os06g40180;LOC_Os07g43670;LOC_Os08g19210
LOC_Os01g51890	7	osa-miR818a osa-miR818b osa-miR818c osa-miR818d osa-miR818e osa-miRf10212-akr osa-miRf11059-akr				osa-miRf10519-akr	8	LOC_Os01g43910;LOC_Os02g51350;LOC_Os03g08390;LOC_Os04g32790;LOC_Os06g06320;LOC_Os06g19690;LOC_Os08g12780;LOC_Os11g07580
LOC_Os01g68320	7	osa-miRf10642-akr osa-miRf10818-akr osa-miRf10833-akr osa-miRf10944-akr osa-miRf10945-akr osa-miRf10946-akr osa-miRf11303-akr				osa-miRf10604-akr	8	LOC_Os01g57940;LOC_Os02g03750;LOC_Os02g48470;LOC_Os02g56250;LOC_Os03g11734;LOC_Os03g57900;LOC_Os07g08710;LOC_Os12g08760
LOC_Os02g36880	7	osa-miR164a osa-miR164b osa-miR164c osa-miR164d osa-miR164e osa-miR164f osa-miRf12029-akr				osa-miRf10620-akr	8	LOC_Os03g24590;LOC_Os04g05050;LOC_Os04g42310;LOC_Os06g07914;LOC_Os06g08014;LOC_Os06g16410;LOC_Os07g40290;LOC_Os08g13570
LOC_Os03g05200	7	osa-miR1436 osa-miRf10173-akr osa-miRf10855-akr osa-miRf11050-akr osa-miRf11132-akr osa-miRf11133-akr osa-miRf11457-akr				osa-miRf10692-akr	8	LOC_Os01g42510;LOC_Os01g66960;LOC_Os03g15033;LOC_Os03g31180;LOC_Os03g38050;LOC_Os09g30140;LOC_Os09g39910;LOC_Os12g40920
LOC_Os03g48380	7	osa-miR812a osa-miR812b osa-miR812c osa-miR812d osa-miR812e osa-miRf10842-akr osa-miRf11090-akr				osa-miRf10762-akr	8	LOC_Os01g66960;LOC_Os03g15033;LOC_Os04g02640;LOC_Os04g58070;LOC_Os05g41190;LOC_Os06g08080;LOC_Os09g30140;LOC_Os12g40920
LOC_Os03g50470	7	osa-miRf10273-akr osa-miRf10570-akr osa-miRf11581-akr osa-miRf11841-akr osa-miRf11936-akr osa-miRf11937-akr osa-miRf12100-akr				osa-miRf10781-akr	8	LOC_Os01g60910;LOC_Os02g34600;LOC_Os03g41460;LOC_Os04g35240;LOC_Os04g40940;LOC_Os06g40370;LOC_Os07g48100;LOC_Os12g34320
LOC_Os04g09900	7	osa-miR1884a osa-miR1884b osa-miRf10710-akr osa-miRf10830-akr osa-miRf11212-akr osa-miRf11219-akr osa-miRf11612-akr				osa-miRf11218-akr	8	LOC_Os03g16470;LOC_Os03g22050;LOC_Os05g25430;LOC_Os05g43910;LOC_Os06g06490;LOC_Os06g12790;LOC_Os06g35700;LOC_Os07g49480
LOC_Os05g07940	7	osa-miRf10025-akr osa-miRf10063-akr osa-miRf10153-akr osa-miRf10172-akr osa-miRf10400-akr osa-miRf10586-akr osa-miRf11737-akr				osa-miRf11624-akr	8	LOC_Os01g12820;LOC_Os03g16470;LOC_Os03g22050;LOC_Os05g25430;LOC_Os06g06490;LOC_Os06g12790;LOC_Os07g49480;LOC_Os09g13440
LOC_Os06g43210	7	osa-miR815a osa-miR815b osa-miR815c osa-miRf10431-akr osa-miRf11147-akr osa-miRf11660-akr osa-miRf11879-akr				osa-miRf11808-akr	8	LOC_Os03g16470;LOC_Os03g22050;LOC_Os05g25430;LOC_Os06g12790;LOC_Os08g38480;LOC_Os09g13440;LOC_Os10g40740;LOC_Os12g12470
LOC_Os06g46270	7	osa-miR164a osa-miR164b osa-miR164c osa-miR164d osa-miR164e osa-miR164f osa-miRf12029-akr				osa-miR164a	7	LOC_Os02g36880;LOC_Os04g41540;LOC_Os06g46270;LOC_Os08g10080;LOC_Os09g37700;LOC_Os11g44940;LOC_Os12g05260
LOC_Os08g23870	7	osa-miR446 osa-miRf10173-akr osa-miRf10855-akr osa-miRf11050-akr osa-miRf11132-akr osa-miRf11133-akr osa-miRf11457-akr				osa-miR164b	7	LOC_Os02g36880;LOC_Os04g41540;LOC_Os06g46270;LOC_Os08g10080;LOC_Os09g37700;LOC_Os11g44940;LOC_Os12g05260
LOC_Os11g46860	7	osa-miRf10039-akr osa-miRf10294-akr osa-miRf10599-akr osa-miRf10670-akr osa-miRf11224-akr osa-miRf11431-akr osa-miRf12059-akr				osa-miR164f	7	LOC_Os02g36880;LOC_Os04g41540;LOC_Os06g46270;LOC_Os08g10080;LOC_Os09g37700;LOC_Os11g44940;LOC_Os12g05260
LOC_Os12g13640	7	osa-miRf10032-akr osa-miRf10168-akr osa-miRf10759-akr osa-miRf10876-akr osa-miRf11003-akr osa-miRf11357-akr osa-miRf11434-akr				osa-miRf10049-akr	7	LOC_Os01g03490;LOC_Os01g09620;LOC_Os01g37590;LOC_Os02g46740;LOC_Os04g55620;LOC_Os07g32570;LOC_Os08g32120
LOC_Os01g24050	6	osa-miRf10441-akr osa-miRf10446-akr osa-miRf10876-akr osa-miRf11003-akr osa-miRf11217-akr osa-miRf11509-akr				osa-miRf10051-akr	7	LOC_Os01g03490;LOC_Os01g09620;LOC_Os01g37590;LOC_Os02g46740;LOC_Os04g55620;LOC_Os07g32570;LOC_Os08g32120
LOC_Os02g17500	6	osa-miR163m osa-miR444a.1 osa-miR444b.1 osa-miR444c.1 osa-miR444d.1 osa-miRf11579-akr				osa-miRf10079-akr	7	LOC_Os02g53200;LOC_Os06g40170;LOC_Os06g40180;LOC_Os06g42000;LOC_Os07g49210;LOC_Os08g06040;LOC_Os09g24690
LOC_Os02g57100	6	osa-miRf10364-akr osa-miRf10567-akr osa-miRf10786-akr osa-miRf11476-akr osa-miRf11779-akr osa-miRf12086-akr				osa-miRf10099-akr	7	LOC_Os03g16470;LOC_Os03g22050;LOC_Os06g12790;LOC_Os08g38480;LOC_Os09g13440;LOC_Os10g05069;LOC_Os10g40824
LOC_Os03g15780	6	osa-miRf10063-akr osa-miRf10161-akr osa-miRf10763-akr osa-miRf10867-akr osa-miRf11197-akr osa-miRf11414-akr				osa-miRf10290-akr	7	LOC_Os02g02540;LOC_Os02g08540;LOC_Os03g29614;LOC_Os05g41620;LOC_Os07g44330;LOC_Os09g39910;LOC_Os12g01560
LOC_Os03g20420	6	osa-miRf10617-akr osa-miRf10618-akr osa-miRf10803-akr osa-miRf10804-akr osa-miRf11203-akr osa-miRf12053-akr				osa-miRf10329-akr	7	LOC_Os02g08410;LOC_Os02g46720;LOC_Os03g02860;LOC_Os06g03690;LOC_Os08g23410;LOC_Os10g31680;LOC_Os12g39620
LOC_Os04g52606	6	osa-miRf10739-akr osa-miRf11243-akr osa-miRf11506-akr osa-miRf11507-akr osa-miRf11781-akr osa-miRf11835-akr				osa-miRf10518-akr	7	LOC_Os01g37630;LOC_Os01g65130;LOC_Os01g70770;LOC_Os02g57410;LOC_Os07g08810;LOC_Os07g25700;LOC_Os08g33479
LOC_Os05g40910	6	osa-miR815a osa-miR815b osa-miR815c osa-miRf10570-akr osa-miRf11936-akr osa-miRf11937-akr				osa-miRf10642-akr	7	LOC_Os01g49820;LOC_Os01g53040;LOC_Os01g68320;LOC_Os04g45750;LOC_Os04g48760;LOC_Os10g38040;LOC_Os12g06464
LOC_Os06g02560	6	osa-miR396a osa-miR396b osa-miR396c osa-miR396d osa-miR396e osa-miR396f				osa-miRf10812-akr	7	LOC_Os02g02040;LOC_Os03g20120;LOC_Os03g57960;LOC_Os04g38570;LOC_Os06g08310;LOC_Os06g40640;LOC_Os07g44410
LOC_Os06g08720	6	osa-miR414 osa-miRf10248-akr osa-miRf10266-akr osa-miRf10408-akr osa-miRf10999-akr osa-miRf11671-akr				osa-miRf10830-akr	7	LOC_Os03g03200;LOC_Os03g39610;LOC_Os04g09900;LOC_Os06g06490;LOC_Os06g35700;LOC_Os07g49480;LOC_Os08g28710
LOC_Os06g14324	6	osa-miRf10152-akr osa-miRf10320-akr osa-miRf11223-akr osa-miRf11695-akr osa-miRf11930-akr osa-miRf12079-akr				osa-miRf11045-akr	7	LOC_Os01g56780;LOC_Os02g53810;LOC_Os02g55480;LOC_Os02g57250;LOC_Os03g19452;LOC_Os10g02480;LOC_Os11g22350
LOC_Os07g42730	6	osa-miRf10172-akr osa-miRf10568-akr osa-miRf10778-akr osa-miRf10829-akr osa-miRf11469-akr osa-miRf11619-akr				osa-miRf11047-akr	7	LOC_Os02g06360;LOC_Os02g48620;LOC_Os08g29669;LOC_Os09g26880;LOC_Os09g36350;LOC_Os10g39030;LOC_Os10g39920
LOC_Os07g48370	6	osa-miR818a osa-miR818b osa-miR818c osa-miR818d osa-miR818e osa-miRf10406-akr				osa-miRf11221-akr	7	LOC_Os02g27060;LOC_Os02g53140;LOC_Os03g10360;LOC_Os04g39440;LOC_Os05g44030;LOC_Os07g10410;LOC_Os12g39830
LOC_Os09g37540	6	osa-miR812a osa-miR812b osa-miR812c osa-miR812d osa-miR812e osa-miRf10229-akr				osa-miRf11240-akr	7	LOC_Os02g14090;LOC_Os05g28520;LOC_Os06g07600;LOC_Os06g45940;LOC_Os08g43120;LOC_Os09g26144;LOC_Os12g31860
LOC_Os09g37700	6	osa-miR164a osa-miR164b osa-miR164c osa-miR164d osa-miR164e osa-miR164f				osa-miRf11316-akr	7	LOC_Os01g64520;LOC_Os02g50372;LOC_Os03g22050;LOC_Os03g29540;LOC_Os06g12790;LOC_Os08g38480;LOC_Os09g13440
LOC_Os10g14920	6	osa-miRf10193-akr osa-miRf10194-akr osa-miRf10195-akr osa-miRf10259-akr osa-miRf10373-akr osa-miRf10806-akr				osa-miRf11372-akr	7	LOC_Os03g22050;LOC_Os03g29970;LOC_Os04g45970;LOC_Os05g39310;LOC_Os06g12790;LOC_Os07g49480;LOC_Os10g05069
LOC_Os12g03720	6	osa-miRf10215-akr osa-miRf10472-akr osa-miRf10594-akr osa-miRf11033-akr osa-miRf11157-akr osa-miRf11365-akr				osa-miRf11491-akr	7	LOC_Os03g14050;LOC_Os03g15033;LOC_Os05g50570;LOC_Os06g08080;LOC_Os09g30140;LOC_Os09g39910;LOC_Os12g40920
LOC_Os01g15039	5	osa-miRf10994-akr osa-miRf11341-akr osa-miRf11682-akr osa-miRf11693-akr osa-miRf12024-akr				osa-miRf11526-akr	7	LOC_Os02g02040;LOC_Os03g20120;LOC_Os03g57960;LOC_Os04g38570;LOC_Os06g08310;LOC_Os06g40640;LOC_Os07g44410
LOC_Os01g70770	5	osa-miRf10060-akr osa-miRf10518-akr osa-miRf10806-akr osa-miRf11680-akr osa-miRf11785-akr				osa-miRf11619-akr	7	LOC_Os01g12820;LOC_Os05g25430;LOC_Os06g06080;LOC_Os06g06490;LOC_Os07g42730;LOC_Os12g03899;LOC_Os12g12470
LOC_Os02g48470	5	osa-miR1861e osa-miR1861k osa-miR1861m osa-miRf10604-akr osa-miRf11518-akr				osa-miRf11656-akr	7	LOC_Os03g51610;LOC_Os05g35400;LOC_Os05g41220;LOC_Os06g07914;LOC_Os06g08014;LOC_Os06g38510;LOC_Os08g44340
LOC_Os02g50372	5	osa-miRf11213-akr osa-miRf11242-akr osa-miRf11316-akr osa-miRf11618-akr osa-miRf11738-akr				osa-miRf11785-akr	7	LOC_Os01g37630;LOC_Os01g65130;LOC_Os01g70770;LOC_Os02g57410;LOC_Os07g08810;LOC_Os07g25700;LOC_Os08g33479
LOC_Os03g02160	5	osa-miRf10069-akr osa-miRf10951-akr osa-miRf11072-akr osa-miRf11852-akr osa-miRf11977-akr				osa-miRf11829-akr	7	LOC_Os01g09100;LOC_Os03g05740;LOC_Os03g13840;LOC_Os03g17230;LOC_Os03g37120;LOC_Os05g38040;LOC_Os09g23550
LOC_Os03g02460	5	osa-miRf10179-akr osa-miRf10180-akr osa-miRf10710-akr osa-miRf11603-akr osa-miRf11780-akr				osa-miRf11955-akr	7	LOC_Os01g66960;LOC_Os03g15033;LOC_Os03g31180;LOC_Os04g02640;LOC_Os09g30140;LOC_Os09g39910;LOC_Os12g40920
LOC_Os03g07200	5	osa-miR395a osa-miR395c osa-miR395o osa-miR395t osa-miRf11513-akr				osa-miRf12044-akr	7	LOC_Os04g40940;LOC_Os04g41250;LOC_Os05g04360;LOC_Os05g35470;LOC_Os06g20370;LOC_Os11g32890;LOC_Os12g08760
LOC_Os03g12010	5	osa-miRf10570-akr osa-miRf11203-akr osa-miRf11841-akr osa-miRf11936-akr osa-miRf11937-akr				osa-miRf12061-akr	7	LOC_Os01g09100;LOC_Os03g05740;LOC_Os03g13840;LOC_Os03g17230;LOC_Os03g37120;LOC_Os05g38040;LOC_Os09g23550
LOC_Os03g16010	5	osa-miRf10223-akr osa-miRf10273-akr osa-miRf10558-akr osa-miRf10860-akr osa-miRf10947-akr				osa-miR164d	6	LOC_Os02g36880;LOC_Os06g46270;LOC_Os08g10080;LOC_Os09g37700;LOC_Os11g44940;LOC_Os12g05260
LOC_Os03g22790	5	osa-miRf10275-akr osa-miRf10276-akr osa-miRf10733-akr osa-miRf11602-akr osa-miRf11685-akr				osa-miR408	6	LOC_Os01g53880;LOC_Os02g05670;LOC_Os06g11490;LOC_Os07g27790;LOC_Os08g37670;LOC_Os10g41040
LOC_Os04g24294	5	osa-miRf10786-akr osa-miRf11248-akr osa-miRf11476-akr osa-miRf11779-akr osa-miRf12086-akr				osa-miR415	6	LOC_Os02g26810;LOC_Os02g56540;LOC_Os04g38630;LOC_Os06g02000;LOC_Os07g12810;LOC_Os12g42280
LOC_Os04g45750	5	osa-miRf10186-akr osa-miRf10642-akr osa-miRf10994-akr osa-miRf11051-akr osa-miRf11303-akr				osa-miR444a.1	6	LOC_Os02g17500;LOC_Os02g49840;LOC_Os03g56280;LOC_Os03g62780;LOC_Os08g33479;LOC_Os10g05750
LOC_Os04g55240	5	osa-miR1848 osa-miR531 osa-miR531b osa-miRf10273-akr osa-miRf11073-akr				osa-miR444d.1	6	LOC_Os02g17500;LOC_Os02g49840;LOC_Os03g56280;LOC_Os03g62780;LOC_Os08g33479;LOC_Os10g05750
LOC_Os05g13940	5	osa-miRf10336-akr osa-miRf11714-akr osa-miRf12014-akr osa-miRf12015-akr osa-miRf12016-akr				osa-miR1884a	6	LOC_Os01g64520;LOC_Os02g49870;LOC_Os03g29540;LOC_Os04g09900;LOC_Os08g28710;LOC_Os11g37950
LOC_Os05g49300	5	osa-miRf10173-akr osa-miRf10201-akr osa-miRf10855-akr osa-miRf11050-akr osa-miRf11133-akr				osa-miRf10180-akr	6	LOC_Os03g02460;LOC_Os03g16470;LOC_Os03g22050;LOC_Os05g25430;LOC_Os05g40200;LOC_Os06g12790
LOC_Os06g40220	5	osa-miRf10474-akr osa-miRf11556-akr osa-miRf11584-akr osa-miRf11696-akr osa-miRf11697-akr				osa-miRf10226-akr	6	LOC_Os01g03144;LOC_Os03g10750;LOC_Os05g19030;LOC_Os06g44200;LOC_Os06g45990;LOC_Os09g37650
LOC_Os07g08810	5	osa-miRf10518-akr osa-miRf10806-akr osa-miRf11680-akr osa-miRf11785-akr osa-miRf11990-akr				osa-miRf10246-akr	6	LOC_Os01g66960;LOC_Os03g15033;LOC_Os03g31180;LOC_Os09g26730;LOC_Os09g30140;LOC_Os09g39910
LOC_Os07g09680	5	osa-miRf10168-akr osa-miRf10759-akr osa-miRf11003-akr osa-miRf11434-akr osa-miRf11509-akr				osa-miRf10447-akr	6	LOC_Os03g56940;LOC_Os03g64070;LOC_Os03g64170;LOC_Os05g03750;LOC_Os06g41060;LOC_Os12g10540
LOC_Os07g42714	5	osa-miRf10044-akr osa-miRf10088-akr osa-miRf11286-akr osa-miRf11334-akr osa-miRf11566-akr				osa-miRf10450-akr	6	LOC_Os01g60600;LOC_Os03g19250;LOC_Os03g58010;LOC_Os04g43440;LOC_Os05g51190;LOC_Os06g23274
LOC_Os07g48550	5	osa-miR1846a-5p osa-miR1846b-5p osa-miR1846c-5p osa-miR420 osa-miRf11095-akr				osa-miRf10477-akr	6	LOC_Os01g02870;LOC_Os01g40250;LOC_Os01g55240;LOC_Os02g07240;LOC_Os02g42590;LOC_Os04g38810
LOC_Os08g03290	5	osa-miRf10254-akr osa-miRf11100-akr osa-miRf11486-akr osa-miRf11845-akr osa-miRf12008-akr				osa-miRf10508-akr	6	LOC_Os01g59100;LOC_Os03g55350;LOC_Os05g13620;LOC_Os05g48340;LOC_Os08g29170;LOC_Os11g13560
LOC_Os08g04460	5	osa-miR168b osa-miRf10096-akr osa-miRf10607-akr osa-miRf10624-akr osa-miRf11713-akr				osa-miRf10578-akr	6	LOC_Os02g18550;LOC_Os02g27480;LOC_Os02g30610;LOC_Os02g35770;LOC_Os04g27950;LOC_Os12g40180
LOC_Os08g41880	5	osa-miR2096-3p osa-miRf10458-akr osa-miRf11098-akr osa-miRf11102-akr osa-miRf11106-akr				osa-miRf10773-akr	6	LOC_Os01g69960;LOC_Os03g25940;LOC_Os04g49460;LOC_Os05g31620;LOC_Os06g05830;LOC_Os11g39640
LOC_Os09g19790	5	osa-miRf10342-akr osa-miRf11272-akr osa-miRf11600-akr osa-miRf11625-akr osa-miRf11966-akr				osa-miRf10808-akr	6	LOC_Os03g16470;LOC_Os03g22050;LOC_Os05g25430;LOC_Os06g12790;LOC_Os07g36570;LOC_Os09g13440
LOC_Os10g25230	5	osa-miR812a osa-miR812b osa-miR812c osa-miR812d osa-miR812e				osa-miRf10809-akr	6	LOC_Os03g16470;LOC_Os03g22050;LOC_Os05g25430;LOC_Os05g43910;LOC_Os06g12790;LOC_Os07g36570
LOC_Os11g42970	5	osa-miR443 osa-miRf10429-akr osa-miRf10947-akr osa-miRf11025-akr osa-miRf12040-akr				osa-miRf10814-akr	6	LOC_Os01g09710;LOC_Os03g16470;LOC_Os03g22050;LOC_Os05g25430;LOC_Os06g12790;LOC_Os09g13440
LOC_Os11g44940	5	osa-miR164a osa-miR164b osa-miR164c osa-miR164d osa-miR164f				osa-miRf10985-akr	6	LOC_Os01g66960;LOC_Os03g15033;LOC_Os05g50570;LOC_Os06g08080;LOC_Os09g30140;LOC_Os12g40920
LOC_Os12g42190	5	osa-miR159c osa-miR159d osa-miR159e osa-miR319a osa-miR319b				osa-miRf11019-akr	6	LOC_Os03g22050;LOC_Os06g06080;LOC_Os06g12790;LOC_Os07g49480;LOC_Os08g38480;LOC_Os09g13440
LOC_Os01g10580	4	osa-miR1858a osa-miR1858b osa-miRf10497-akr osa-miRf11612-akr				osa-miRf11042-akr	6	LOC_Os01g66960;LOC_Os03g15033;LOC_Os05g44070;LOC_Os06g08080;LOC_Os09g30140;LOC_Os12g40920
LOC_Os01g43040	4	osa-miR1858a osa-miR1858b osa-miRf10223-akr osa-miRf11390-akr				osa-miRf11043-akr	6	LOC_Os01g66960;LOC_Os03g15033;LOC_Os05g44070;LOC_Os06g08080;LOC_Os09g30140;LOC_Os12g40920
LOC_Os01g49820	4	osa-miRf10642-akr osa-miRf11731-akr osa-miRf12087-akr osa-miRf12088-akr				osa-miRf11202-akr	6	LOC_Os01g12820;LOC_Os03g22050;LOC_Os06g12790;LOC_Os07g49480;LOC_Os09g13440;LOC_Os10g40824
LOC_Os01g50310	4	osa-miR1846a-3p osa-miR1846b-3p osa-miRf11026-akr osa-miRf11579-akr				osa-miRf11209-akr	6	LOC_Os01g55240;LOC_Os03g28270;LOC_Os03g49260;LOC_Os04g57590;LOC_Os05g37450;LOC_Os06g04610
LOC_Os01g59100	4	osa-miRf10172-akr osa-miRf10272-akr osa-miRf10273-akr osa-miRf10508-akr				osa-miRf11242-akr	6	LOC_Os01g36600;LOC_Os01g59500;LOC_Os02g50372;LOC_Os05g35400;LOC_Os09g32680;LOC_Os09g38090
LOC_Os01g65780	4	osa-miR529b osa-miRf10353-akr osa-miRf10411-akr osa-miRf11236-akr				osa-miRf11267-akr	6	LOC_Os01g61720;LOC_Os03g22210;LOC_Os08g17390;LOC_Os08g37350;LOC_Os09g38320;LOC_Os12g08260
LOC_Os02g03040	4	osa-miR1858a osa-miR1858b osa-miRf10261-akr osa-miRf11500-akr				osa-miRf11308-akr	6	LOC_Os01g66960;LOC_Os03g15033;LOC_Os05g50570;LOC_Os06g08080;LOC_Os09g30140;LOC_Os12g40920
LOC_Os02g05670	4	osa-miR1439 osa-miR408 osa-miRf10223-akr osa-miRf12002-akr				osa-miRf11780-akr	6	LOC_Os01g65130;LOC_Os03g02460;LOC_Os06g12790;LOC_Os09g13440;LOC_Os11g14570;LOC_Os12g12470
LOC_Os02g18550	4	osa-miRf10578-akr osa-miRf11098-akr osa-miRf11102-akr osa-miRf11106-akr				osa-miR164c	5	LOC_Os02g36880;LOC_Os06g46270;LOC_Os08g10080;LOC_Os09g37700;LOC_Os11g44940
LOC_Os02g39570	4	osa-miR1879 osa-miRf11321-akr osa-miRf11609-akr osa-miRf11652-akr				osa-miR444b.1	5	LOC_Os02g17500;LOC_Os02g26470;LOC_Os02g49840;LOC_Os05g12770;LOC_Os10g33840
LOC_Os02g48620	4	osa-miR441a osa-miR441b osa-miR441c osa-miRf11047-akr				osa-miR444c.1	5	LOC_Os02g17500;LOC_Os02g26470;LOC_Os02g49840;LOC_Os05g12770;LOC_Os10g33840
LOC_Os02g49870	4	osa-miR1884a osa-miR1884b osa-miRf11219-akr osa-miRf11341-akr				osa-miR816	5	LOC_Os03g63074;LOC_Os04g32540;LOC_Os04g43290;LOC_Os05g45820;LOC_Os11g02400
LOC_Os02g53200	4	osa-miR1848 osa-miR529b osa-miRf10063-akr osa-miRf10079-akr				osa-miR1320	5	LOC_Os01g73670;LOC_Os06g43800;LOC_Os10g41330;LOC_Os12g13940;LOC_Os12g42220
LOC_Os02g58790	4	osa-miRf10617-akr osa-miRf10618-akr osa-miRf10803-akr osa-miRf10804-akr				osa-miR1846a-3p	5	LOC_Os01g17160;LOC_Os01g50310;LOC_Os04g36800;LOC_Os05g15520;LOC_Os08g42020
LOC_Os03g06760	4	osa-miR815a osa-miR815b osa-miR815c osa-miRf10713-akr				osa-miR1846b-3p	5	LOC_Os01g17160;LOC_Os01g50310;LOC_Os04g36800;LOC_Os05g15520;LOC_Os08g42020
LOC_Os03g07570	4	osa-miRf10273-akr osa-miRf10756-akr osa-miRf10934-akr osa-miRf11750-akr				osa-miR1884b	5	LOC_Os01g64520;LOC_Os02g49870;LOC_Os03g29540;LOC_Os04g09900;LOC_Os11g37950
LOC_Os03g07920	4	osa-miR815a osa-miR815b osa-miR815c osa-miRf11936-akr				osa-miR2102-3p	5	LOC_Os01g71690;LOC_Os02g56600;LOC_Os03g26870;LOC_Os08g25700;LOC_Os09g25150
LOC_Os03g09860	4	osa-miRf10272-akr osa-miRf10273-akr osa-miRf10726-akr osa-miRf11927-akr				osa-miRf10132-akr	5	LOC_Os01g05610;LOC_Os01g05900;LOC_Os01g05950;LOC_Os01g05990;LOC_Os08g38300
LOC_Os03g17230	4	osa-miRf10271-akr osa-miRf10273-akr osa-miRf11829-akr osa-miRf12061-akr				osa-miRf10151-akr	5	LOC_Os04g55230;LOC_Os05g03610;LOC_Os05g15510;LOC_Os06g12790;LOC_Os10g40740
LOC_Os03g27080	4	osa-miRf10522-akr osa-miRf10633-akr osa-miRf11101-akr osa-miRf11411-akr				osa-miRf10361-akr	5	LOC_Os01g10320;LOC_Os01g25920;LOC_Os01g27720;LOC_Os01g27990;LOC_Os07g29320
LOC_Os03g43590	4	osa-miRf10874-akr osa-miRf11009-akr osa-miRf11082-akr osa-miRf11972-akr				osa-miRf10421-akr	5	LOC_Os04g32540;LOC_Os07g41060;LOC_Os08g28710;LOC_Os09g07154;LOC_Os09g13440
LOC_Os03g48320	4	osa-miR1435 osa-miRf11076-akr osa-miRf11323-akr osa-miRf11641-akr				osa-miRf10472-akr	5	LOC_Os01g33800;LOC_Os06g35160;LOC_Os07g06980;LOC_Os11g13750;LOC_Os12g03720
LOC_Os03g58010	4	osa-miR531b osa-miRf10210-akr osa-miRf10450-akr osa-miRf10778-akr				osa-miRf10495-akr	5	LOC_Os02g08410;LOC_Os02g55870;LOC_Os04g39430;LOC_Os06g03690;LOC_Os09g33490
LOC_Os04g38570	4	osa-miRf10812-akr osa-miRf10995-akr osa-miRf11526-akr osa-miRf11543-akr				osa-miRf10594-akr	5	LOC_Os01g33800;LOC_Os06g35160;LOC_Os07g06980;LOC_Os11g13750;LOC_Os12g03720
LOC_Os04g42090	4	osa-miR166i osa-miR166j osa-miR2101-5p osa-miRf10562-akr				osa-miRf10605-akr	5	LOC_Os01g73020;LOC_Os02g54890;LOC_Os04g12960;LOC_Os06g15330;LOC_Os11g10750
LOC_Os04g42670	4	osa-miR1858a osa-miR1858b osa-miRf10441-akr osa-miRf11217-akr				osa-miRf10633-akr	5	LOC_Os03g27080;LOC_Os05g18294;LOC_Os05g19630;LOC_Os08g13430;LOC_Os11g25780
LOC_Os04g42784	4	osa-miRf10786-akr osa-miRf11248-akr osa-miRf11476-akr osa-miRf12086-akr				osa-miRf10778-akr	5	LOC_Os02g23823;LOC_Os03g51690;LOC_Os03g58010;LOC_Os05g51190;LOC_Os07g42730
LOC_Os04g43290	4	osa-miR816 osa-miRf10261-akr osa-miRf10406-akr osa-miRf11060-akr				osa-miRf10787-akr	5	LOC_Os01g66960;LOC_Os03g15033;LOC_Os03g31180;LOC_Os09g30140;LOC_Os09g39910
LOC_Os04g53560	4	osa-miRf10894-akr osa-miRf10896-akr osa-miRf11080-akr osa-miRf11149-akr				osa-miRf10791-akr	5	LOC_Os05g05600;LOC_Os05g18294;LOC_Os08g13430;LOC_Os11g04104;LOC_Os12g03899
LOC_Os04g58570	4	osa-miR529a osa-miRf11098-akr osa-miRf11102-akr osa-miRf11106-akr				osa-miRf10807-akr	5	LOC_Os01g68580;LOC_Os05g29760;LOC_Os06g14050;LOC_Os08g36910;LOC_Os12g38051
LOC_Os05g07820	4	osa-miRf10065-akr osa-miRf10760-akr osa-miRf11773-akr osa-miRf11774-akr				osa-miRf10810-akr	5	LOC_Os03g16470;LOC_Os03g22050;LOC_Os05g25430;LOC_Os06g12790;LOC_Os06g35700
LOC_Os05g14900	4	osa-miRf10173-akr osa-miRf10855-akr osa-miRf11050-akr osa-miRf11133-akr				osa-miRf10876-akr	5	LOC_Os01g24050;LOC_Os01g47820;LOC_Os02g08410;LOC_Os03g29970;LOC_Os12g13640
LOC_Os05g35060	4	osa-miRf10222-akr osa-miRf10272-akr osa-miRf10273-akr osa-miRf11341-akr				osa-miRf10899-akr	5	LOC_Os01g11700;LOC_Os02g08530;LOC_Os04g49757;LOC_Os06g21890;LOC_Os06g36560
LOC_Os05g37160	4	osa-miRf10108-akr osa-miRf10987-akr osa-miRf11233-akr osa-miRf11643-akr				osa-miRf10964-akr	5	LOC_Os01g39060;LOC_Os03g58040;LOC_Os05g18294;LOC_Os05g19630;LOC_Os08g13430
LOC_Os05g38040	4	osa-miRf11829-akr osa-miRf11893-akr osa-miRf11983-akr osa-miRf12061-akr				osa-miRf10984-akr	5	LOC_Os01g42850;LOC_Os02g51700;LOC_Os04g38230;LOC_Os06g09679;LOC_Os07g38930
LOC_Os05g39310	4	osa-miRf10572-akr osa-miRf10710-akr osa-miRf11372-akr osa-miRf12040-akr				osa-miRf11003-akr	5	LOC_Os01g24050;LOC_Os02g08410;LOC_Os03g29970;LOC_Os07g09680;LOC_Os12g13640
LOC_Os05g44030	4	osa-miRf10092-akr osa-miRf10305-akr osa-miRf11203-akr osa-miRf11221-akr				osa-miRf11009-akr	5	LOC_Os01g43480;LOC_Os03g21850;LOC_Os03g43590;LOC_Os06g13190;LOC_Os10g38540
LOC_Os05g51190	4	osa-miRf10210-akr osa-miRf10450-akr osa-miRf10498-akr osa-miRf10778-akr				osa-miRf11013-akr	5	LOC_Os01g66030;LOC_Os03g16670;LOC_Os03g55320;LOC_Os05g46480;LOC_Os07g48160
LOC_Os06g04070	4	osa-miR1848 osa-miR815a osa-miR815b osa-miR815c				osa-miRf11101-akr	5	LOC_Os03g27080;LOC_Os05g18294;LOC_Os05g19630;LOC_Os08g13430;LOC_Os11g25780
LOC_Os06g40170	4	osa-miRf10079-akr osa-miRf10481-akr osa-miRf10736-akr osa-miRf12010-akr				osa-miRf11157-akr	5	LOC_Os01g33800;LOC_Os06g35160;LOC_Os07g06980;LOC_Os11g13750;LOC_Os12g03720
LOC_Os06g40818	4	osa-miRf10272-akr osa-miRf10273-akr osa-miRf11025-akr osa-miRf11519-akr				osa-miRf11158-akr	5	LOC_Os01g37690;LOC_Os06g46670;LOC_Os08g15444;LOC_Os11g47760;LOC_Os12g21734
LOC_Os06g43044	4	osa-miR1427 osa-miRf10223-akr osa-miRf10272-akr osa-miRf10273-akr				osa-miRf11182-akr	5	LOC_Os03g22050;LOC_Os06g06080;LOC_Os06g35700;LOC_Os07g49480;LOC_Os08g28710
LOC_Os06g45940	4	osa-miRf10261-akr osa-miRf10930-akr osa-miRf11240-akr osa-miRf11906-akr				osa-miRf11215-akr	5	LOC_Os03g22050;LOC_Os05g25430;LOC_Os06g48030;LOC_Os07g49480;LOC_Os09g13440
LOC_Os06g46670	4	osa-miR437 osa-miRf10797-akr osa-miRf11158-akr osa-miRf11457-akr				osa-miRf11347-akr	5	LOC_Os01g68370;LOC_Os02g50340;LOC_Os04g32980;LOC_Os06g03220;LOC_Os08g04130
LOC_Os07g43390	4	osa-miRf10005-akr osa-miRf10057-akr osa-miRf10861-akr osa-miRf11059-akr				osa-miRf11355-akr	5	LOC_Os01g25720;LOC_Os03g60260;LOC_Os05g40200;LOC_Os09g39760;LOC_Os12g04290
LOC_Os08g31850	4	osa-miR1848 osa-miRf10128-akr osa-miRf11518-akr osa-miRf11786-akr				osa-miRf11365-akr	5	LOC_Os01g33800;LOC_Os06g35160;LOC_Os07g06980;LOC_Os11g13750;LOC_Os12g03720
LOC_Os08g36910	4	osa-miR1432 osa-miR1439 osa-miRf10406-akr osa-miRf10807-akr				osa-miRf11411-akr	5	LOC_Os03g27080;LOC_Os05g18294;LOC_Os05g19630;LOC_Os08g13430;LOC_Os11g25780
LOC_Os08g43120	4	osa-miRf10123-akr osa-miRf10775-akr osa-miRf11160-akr osa-miRf11240-akr				osa-miRf11506-akr	5	LOC_Os02g55480;LOC_Os03g62170;LOC_Os04g52606;LOC_Os06g23274;LOC_Os07g43020
LOC_Os09g04440	4	osa-miRf10525-akr osa-miRf10712-akr osa-miRf11134-akr osa-miRf11161-akr				osa-miRf11507-akr	5	LOC_Os02g55480;LOC_Os03g62170;LOC_Os04g52606;LOC_Os06g23274;LOC_Os07g43020
LOC_Os09g09500	4	osa-miR1861d osa-miR1861h osa-miR1861j osa-miRf10471-akr				osa-miRf11530-akr	5	LOC_Os02g52560;LOC_Os07g30670;LOC_Os09g27590;LOC_Os11g47760;LOC_Os12g44230
LOC_Os09g31300	4	osa-miRf10273-akr osa-miRf10632-akr osa-miRf10863-akr osa-miRf10947-akr				osa-miRf11538-akr	5	LOC_Os01g10320;LOC_Os03g53910;LOC_Os09g15680;LOC_Os09g30210;LOC_Os10g41310
LOC_Os09g33690	4	osa-miRf10842-akr osa-miRf11090-akr osa-miRf11147-akr osa-miRf12023-akr				osa-miRf11622-akr	5	LOC_Os02g15550;LOC_Os02g32980;LOC_Os04g51610;LOC_Os08g36760;LOC_Os09g21110
LOC_Os10g01080	4	osa-miR1436 osa-miRf10173-akr osa-miRf10855-akr osa-miRf11133-akr				osa-miRf11623-akr	5	LOC_Os04g32540;LOC_Os05g45820;LOC_Os06g48030;LOC_Os07g49460;LOC_Os08g12410
LOC_Os10g40260	4	osa-miRf10708-akr osa-miRf10774-akr osa-miRf10957-akr osa-miRf11856-akr				osa-miRf11647-akr	5	LOC_Os01g46970;LOC_Os01g65790;LOC_Os02g20540;LOC_Os04g02620;LOC_Os10g28230
LOC_Os10g40824	4	osa-miRf10099-akr osa-miRf11202-akr osa-miRf11213-akr osa-miRf11270-akr				osa-miRf11680-akr	5	LOC_Os01g65130;LOC_Os01g70770;LOC_Os06g13040;LOC_Os07g08810;LOC_Os07g25700
LOC_Os11g02400	4	osa-miR816 osa-miRf10172-akr osa-miRf10406-akr osa-miRf12002-akr				osa-miRf11856-akr	5	LOC_Os01g03730;LOC_Os02g38290;LOC_Os07g43322;LOC_Os08g39550;LOC_Os10g40260
LOC_Os11g14570	4	osa-miR169a osa-miRf11090-akr osa-miRf11219-akr osa-miRf11780-akr				osa-miRf11972-akr	5	LOC_Os01g43480;LOC_Os03g21850;LOC_Os03g43590;LOC_Os06g13190;LOC_Os10g38540
LOC_Os11g41600	4	osa-miRf10153-akr osa-miRf10223-akr osa-miRf10272-akr osa-miRf10273-akr				osa-miR156p	4	LOC_Os01g69830;LOC_Os05g48800;LOC_Os07g27320;LOC_Os07g32170
LOC_Os12g05260	4	osa-miR164a osa-miR164b osa-miR164d osa-miR164f				osa-miR159a	4	LOC_Os01g11430;LOC_Os01g48850;LOC_Os03g21380;LOC_Os05g42240
LOC_Os12g07030	4	osa-miR1866-5p osa-miRf10272-akr osa-miRf10273-akr osa-miRf10752-akr				osa-miR159b	4	LOC_Os01g11430;LOC_Os01g48850;LOC_Os03g21380;LOC_Os05g42240
LOC_Os12g17550	4	osa-miR1854-5p osa-miR1860-3p osa-miR1879 osa-miRf10224-akr				osa-miR159m	4	LOC_Os01g11430;LOC_Os01g48850;LOC_Os03g21380;LOC_Os05g42240
LOC_Os12g25180	4	osa-miRf11064-akr osa-miRf11129-akr osa-miRf11366-akr osa-miRf11805-akr				osa-miR164e	4	LOC_Os02g36880;LOC_Os06g46270;LOC_Os08g10080;LOC_Os09g37700
LOC_Os12g40900	4	osa-miR1424 osa-miRf10632-akr osa-miRf11732-akr osa-miRf11938-akr				osa-miR169a	4	LOC_Os02g53620;LOC_Os03g07880;LOC_Os03g29760;LOC_Os11g14570
LOC_Os12g42070	4	osa-miR815a osa-miR815b osa-miR815c osa-miRf11638-akr				osa-miR169d	4	LOC_Os02g53620;LOC_Os03g07880;LOC_Os03g29760;LOC_Os03g48970
LOC_Os01g03490	3	osa-miRf10049-akr osa-miRf10051-akr osa-miRf11814-akr				osa-miR169f	4	LOC_Os02g53620;LOC_Os03g07880;LOC_Os03g29760;LOC_Os03g48970
LOC_Os01g04720	3	osa-miR1428b osa-miR1428c osa-miR1428d				osa-miR169g	4	LOC_Os02g53620;LOC_Os03g07880;LOC_Os03g29760;LOC_Os03g48970
LOC_Os01g08150	3	osa-miRf11098-akr osa-miRf11102-akr osa-miRf11106-akr				osa-miR169h	4	LOC_Os02g53620;LOC_Os03g07880;LOC_Os03g29760;LOC_Os03g48970
LOC_Os01g08460	3	osa-miRf10172-akr osa-miRf11415-akr osa-miRf12002-akr				osa-miR169i	4	LOC_Os02g53620;LOC_Os03g07880;LOC_Os03g29760;LOC_Os03g48970
LOC_Os01g09710	3	osa-miRf10814-akr osa-miRf11213-akr osa-miRf11270-akr				osa-miR169j	4	LOC_Os02g53620;LOC_Os03g07880;LOC_Os03g29760;LOC_Os03g48970
LOC_Os01g10320	3	osa-miRf10361-akr osa-miRf11353-akr osa-miRf11538-akr				osa-miR169k	4	LOC_Os02g53620;LOC_Os03g07880;LOC_Os03g29760;LOC_Os03g48970
LOC_Os01g11430	3	osa-miR159a osa-miR159b osa-miR159m				osa-miR169l	4	LOC_Os02g53620;LOC_Os03g07880;LOC_Os03g29760;LOC_Os03g48970
LOC_Os01g11460	3	osa-miRf11098-akr osa-miRf11102-akr osa-miRf11106-akr				osa-miR169m	4	LOC_Os02g53620;LOC_Os03g07880;LOC_Os03g29760;LOC_Os03g48970
LOC_Os01g11700	3	osa-miRf10304-akr osa-miRf10899-akr osa-miRf11179-akr				osa-miR397a	4	LOC_Os01g62480;LOC_Os03g16610;LOC_Os05g38420;LOC_Os11g48060
LOC_Os01g17160	3	osa-miR1846a-3p osa-miR1846b-3p osa-miRf10632-akr				osa-miR397b	4	LOC_Os03g16610;LOC_Os05g38420;LOC_Os09g27950;LOC_Os11g48060
LOC_Os01g22990	3	osa-miR414 osa-miRf11613-akr osa-miRf12029-akr				osa-miR399h	4	LOC_Os03g13800;LOC_Os04g33860;LOC_Os05g48390;LOC_Os09g38330
LOC_Os01g37630	3	osa-miRf10518-akr osa-miRf10806-akr osa-miRf11785-akr				osa-miR399i	4	LOC_Os01g54480;LOC_Os02g13960;LOC_Os04g55230;LOC_Os05g48390
LOC_Os01g42380	3	osa-miR815a osa-miR815b osa-miR815c				osa-miR437	4	LOC_Os01g72370;LOC_Os06g46670;LOC_Os07g35290;LOC_Os11g42220
LOC_Os01g51870	3	osa-miRf10823-akr osa-miRf10866-akr osa-miRf11893-akr				osa-miR444a.2	4	LOC_Os02g49840;LOC_Os03g58790;LOC_Os07g25810;LOC_Os08g33479
LOC_Os01g56780	3	osa-miR1861c osa-miR530-5p osa-miRf11045-akr				osa-miR444d.2	4	LOC_Os02g49840;LOC_Os03g58790;LOC_Os07g25810;LOC_Os08g33479
LOC_Os01g59930	3	osa-miRf10000-akr osa-miRf10001-akr osa-miRf10589-akr				osa-miR444e	4	LOC_Os02g49840;LOC_Os03g58790;LOC_Os07g25810;LOC_Os08g33479
LOC_Os01g62900	3	osa-miRf10756-akr osa-miRf11481-akr osa-miRf11724-akr				osa-miR529a	4	LOC_Os03g11890;LOC_Os04g58570;LOC_Os10g39090;LOC_Os10g41560
LOC_Os01g63290	3	osa-miR167a osa-miR167b osa-miR167c				osa-miR530-5p	4	LOC_Os01g43380;LOC_Os01g56780;LOC_Os03g52840;LOC_Os11g04520
LOC_Os01g64520	3	osa-miR1884a osa-miR1884b osa-miRf11316-akr				osa-miR812a	4	LOC_Os03g22050;LOC_Os03g48380;LOC_Os09g37540;LOC_Os10g25230
LOC_Os01g65790	3	osa-miRf10060-akr osa-miRf10063-akr osa-miRf11647-akr				osa-miR812b	4	LOC_Os03g22050;LOC_Os03g48380;LOC_Os09g37540;LOC_Os10g25230
LOC_Os01g67890	3	osa-miRf11026-akr osa-miRf11089-akr osa-miRf11817-akr				osa-miR812c	4	LOC_Os03g22050;LOC_Os03g48380;LOC_Os09g37540;LOC_Os10g25230
LOC_Os01g68560	3	osa-miRf11098-akr osa-miRf11102-akr osa-miRf11106-akr				osa-miR812d	4	LOC_Os03g22050;LOC_Os03g48380;LOC_Os09g37540;LOC_Os10g25230
LOC_Os02g08540	3	osa-miR1858a osa-miR1858b osa-miRf10290-akr				osa-miR812e	4	LOC_Os03g22050;LOC_Os03g48380;LOC_Os09g37540;LOC_Os10g25230
LOC_Os02g14900	3	osa-miRf10164-akr osa-miRf10268-akr osa-miRf12029-akr				osa-miR819a	4	LOC_Os03g15033;LOC_Os03g31180;LOC_Os09g30140;LOC_Os09g39910
LOC_Os02g22130	3	osa-miRf11793-akr osa-miRf12047-akr osa-miRf12048-akr				osa-miR819b	4	LOC_Os03g15033;LOC_Os03g31180;LOC_Os09g30140;LOC_Os09g39910
LOC_Os02g45520	3	osa-miR531b osa-miR827a osa-miR827b				osa-miR819c	4	LOC_Os03g15033;LOC_Os03g31180;LOC_Os09g30140;LOC_Os09g39910
LOC_Os02g46720	3	osa-miRf10329-akr osa-miRf10765-akr osa-miRf12030-akr				osa-miR819d	4	LOC_Os03g15033;LOC_Os03g31180;LOC_Os09g30140;LOC_Os09g39910
LOC_Os02g49690	3	osa-miRf10325-akr osa-miRf10326-akr osa-miRf10327-akr				osa-miR819e	4	LOC_Os03g15033;LOC_Os03g31180;LOC_Os09g30140;LOC_Os09g39910
LOC_Os02g53810	3	osa-miR1860-3p osa-miRf11045-akr osa-miRf11613-akr				osa-miR819f	4	LOC_Os03g15033;LOC_Os03g31180;LOC_Os09g30140;LOC_Os09g39910
LOC_Os02g57410	3	osa-miRf10518-akr osa-miRf10672-akr osa-miRf11785-akr				osa-miR819g	4	LOC_Os03g15033;LOC_Os03g31180;LOC_Os09g30140;LOC_Os09g39910
LOC_Os02g57720	3	osa-miRf10223-akr osa-miRf10947-akr osa-miRf11613-akr				osa-miR819h	4	LOC_Os03g15033;LOC_Os03g31180;LOC_Os09g30140;LOC_Os09g39910
LOC_Os02g58230	3	osa-miRf11098-akr osa-miRf11102-akr osa-miRf11106-akr				osa-miR819i	4	LOC_Os03g15033;LOC_Os03g31180;LOC_Os09g30140;LOC_Os09g39910
LOC_Os03g08170	3	osa-miRf10063-akr osa-miRf11665-akr osa-miRf12029-akr				osa-miR819j	4	LOC_Os03g15033;LOC_Os03g31180;LOC_Os09g30140;LOC_Os09g39910
LOC_Os03g08390	3	osa-miR1858a osa-miR1858b osa-miRf10519-akr				osa-miR819k	4	LOC_Os03g15033;LOC_Os03g31180;LOC_Os09g30140;LOC_Os09g39910
LOC_Os03g10750	3	osa-miRf10226-akr osa-miRf10863-akr osa-miRf11123-akr				osa-miR1427	4	LOC_Os01g04280;LOC_Os03g04660;LOC_Os06g14810;LOC_Os06g43044
LOC_Os03g21000	3	osa-miRf10272-akr osa-miRf10273-akr osa-miRf10458-akr				osa-miR1861d	4	LOC_Os02g16830;LOC_Os05g12400;LOC_Os05g12640;LOC_Os09g09500
LOC_Os03g21380	3	osa-miR159a osa-miR159b osa-miR159m				osa-miR1866-5p	4	LOC_Os03g25490;LOC_Os04g33310;LOC_Os12g07030;LOC_Os12g13940
LOC_Os03g21530	3	osa-miR414 osa-miRf10699-akr osa-miRf11681-akr				osa-miR2104	4	LOC_Os02g48380;LOC_Os03g03450;LOC_Os05g08450;LOC_Os11g37510
LOC_Os03g21850	3	osa-miRf10478-akr osa-miRf11009-akr osa-miRf11972-akr				osa-miRf10070-akr	4	LOC_Os01g14950;LOC_Os03g11110;LOC_Os04g40700;LOC_Os06g03690
LOC_Os03g22610	3	osa-miRf11052-akr osa-miRf11144-akr osa-miRf11505-akr				osa-miRf10105-akr	4	LOC_Os01g15580;LOC_Os01g38980;LOC_Os06g08310;LOC_Os08g01830
LOC_Os03g27830	3	osa-miRf10063-akr osa-miRf11772-akr osa-miRf11996-akr				osa-miRf10168-akr	4	LOC_Os02g08410;LOC_Os03g29970;LOC_Os07g09680;LOC_Os12g13640
LOC_Os03g27990	3	osa-miRf11260-akr osa-miRf11931-akr osa-miRf12002-akr				osa-miRf10202-akr	4	LOC_Os01g43480;LOC_Os06g13190;LOC_Os10g37500;LOC_Os11g04030
LOC_Os03g40830	3	osa-miRf10491-akr osa-miRf11390-akr osa-miRf12002-akr				osa-miRf10212-akr	4	LOC_Os01g12820;LOC_Os01g51890;LOC_Os01g72370;LOC_Os06g39330
LOC_Os03g45990	3	osa-miR807a osa-miR807b osa-miR807c				osa-miRf10215-akr	4	LOC_Os06g35160;LOC_Os07g06980;LOC_Os11g13750;LOC_Os12g03720
LOC_Os03g52280	3	osa-miR1862d osa-miR1862e osa-miRf11212-akr				osa-miRf10216-akr	4	LOC_Os01g33800;LOC_Os06g35160;LOC_Os07g06980;LOC_Os11g13750
LOC_Os03g52320	3	osa-miR393 osa-miR393b osa-miRf10458-akr				osa-miRf10277-akr	4	LOC_Os01g11340;LOC_Os03g60260;LOC_Os10g39140;LOC_Os12g12880
LOC_Os03g56070	3	osa-miRf11098-akr osa-miRf11102-akr osa-miRf11106-akr				osa-miRf10302-akr	4	LOC_Os03g22050;LOC_Os05g25430;LOC_Os06g12790;LOC_Os09g13440
LOC_Os03g56250	3	osa-miRf11098-akr osa-miRf11102-akr osa-miRf11106-akr				osa-miRf10309-akr	4	LOC_Os01g33800;LOC_Os06g35160;LOC_Os07g06980;LOC_Os11g13750
LOC_Os03g57450	3	osa-miRf11014-akr osa-miRf11015-akr osa-miRf11025-akr				osa-miRf10330-akr	4	LOC_Os03g24844;LOC_Os05g39970;LOC_Os06g21890;LOC_Os06g23274
LOC_Os03g58040	3	osa-miRf10184-akr osa-miRf10927-akr osa-miRf10964-akr				osa-miRf10359-akr	4	LOC_Os01g33800;LOC_Os06g35160;LOC_Os07g06980;LOC_Os11g13750
LOC_Os03g58580	3	osa-miR813 osa-miRf11658-akr osa-miRf11893-akr				osa-miRf10376-akr	4	LOC_Os05g18294;LOC_Os08g13430;LOC_Os11g25780;LOC_Os11g41034
LOC_Os03g60260	3	osa-miRf10060-akr osa-miRf10277-akr osa-miRf11355-akr				osa-miRf10416-akr	4	LOC_Os01g65130;LOC_Os06g12790;LOC_Os09g13440;LOC_Os12g12470
LOC_Os03g61430	3	osa-miRf10418-akr osa-miRf10926-akr osa-miRf11405-akr				osa-miRf10417-akr	4	LOC_Os05g18294;LOC_Os08g13430;LOC_Os11g25780;LOC_Os11g41034
LOC_Os04g05010	3	osa-miRf11168-akr osa-miRf11171-akr osa-miRf11179-akr				osa-miRf10443-akr	4	LOC_Os02g03670;LOC_Os06g06490;LOC_Os09g13440;LOC_Os10g40740
LOC_Os04g08270	3	osa-miRf10641-akr osa-miRf11303-akr osa-miRf12056-akr				osa-miRf10461-akr	4	LOC_Os02g44360;LOC_Os02g44370;LOC_Os04g42000;LOC_Os10g21360
LOC_Os04g33490	3	osa-miRf10566-akr osa-miRf10637-akr osa-miRf11667-akr				osa-miRf10498-akr	4	LOC_Os05g51190;LOC_Os06g02800;LOC_Os08g07840;LOC_Os08g38810
LOC_Os04g34230	3	osa-miR1858a osa-miR1858b osa-miRf10819-akr				osa-miRf10522-akr	4	LOC_Os03g27080;LOC_Os05g18294;LOC_Os05g19630;LOC_Os08g13430
LOC_Os04g35240	3	osa-miRf10236-akr osa-miRf10781-akr osa-miRf10819-akr				osa-miRf10534-akr	4	LOC_Os05g18294;LOC_Os05g19630;LOC_Os08g13430;LOC_Os11g25780
LOC_Os04g35380	3	osa-miRf10186-akr osa-miRf11051-akr osa-miRf11781-akr				osa-miRf10570-akr	4	LOC_Os03g12010;LOC_Os03g50470;LOC_Os05g18294;LOC_Os05g40910
LOC_Os04g36670	3	osa-miRf10272-akr osa-miRf10273-akr osa-miRf11025-akr				osa-miRf10576-akr	4	LOC_Os02g36974;LOC_Os02g48830;LOC_Os10g08319;LOC_Os11g29870
LOC_Os04g38810	3	osa-miRf10477-akr osa-miRf11025-akr osa-miRf11074-akr				osa-miRf10615-akr	4	LOC_Os02g04670;LOC_Os03g20949;LOC_Os06g48620;LOC_Os07g28820
LOC_Os04g40740	3	osa-miR414 osa-miRf11608-akr osa-miRf12014-akr				osa-miRf10627-akr	4	LOC_Os01g39060;LOC_Os05g18294;LOC_Os05g19630;LOC_Os08g13430
LOC_Os04g41540	3	osa-miR164a osa-miR164b osa-miR164f				osa-miRf10635-akr	4	LOC_Os01g33800;LOC_Os06g35160;LOC_Os07g06980;LOC_Os11g13750
LOC_Os04g43660	3	osa-miRf10516-akr osa-miRf10849-akr osa-miRf11024-akr				osa-miRf10734-akr	4	LOC_Os01g10930;LOC_Os06g24730;LOC_Os07g04220;LOC_Os12g03370
LOC_Os04g47040	3	osa-miRf10063-akr osa-miRf10680-akr osa-miRf12029-akr				osa-miRf10735-akr	4	LOC_Os03g22050;LOC_Os06g12790;LOC_Os08g28710;LOC_Os08g38480
LOC_Os04g48760	3	osa-miRf10642-akr osa-miRf10844-akr osa-miRf12058-akr				osa-miRf10743-akr	4	LOC_Os04g32540;LOC_Os06g06080;LOC_Os09g13440;LOC_Os12g12470
LOC_Os04g49060	3	osa-miRf10794-akr osa-miRf10835-akr osa-miRf11424-akr				osa-miRf10759-akr	4	LOC_Os02g08410;LOC_Os03g29970;LOC_Os07g09680;LOC_Os12g13640
LOC_Os04g51610	3	osa-miR1318 osa-miR1432 osa-miRf11622-akr				osa-miRf10761-akr	4	LOC_Os03g15033;LOC_Os06g08080;LOC_Os09g30140;LOC_Os12g40920
LOC_Os04g52500	3	osa-miR441a osa-miR441b osa-miR441c				osa-miRf10804-akr	4	LOC_Os02g58790;LOC_Os03g11910;LOC_Os03g20420;LOC_Os03g61710
LOC_Os04g55230	3	osa-miR399i osa-miRf10151-akr osa-miRf10158-akr				osa-miRf10816-akr	4	LOC_Os01g33800;LOC_Os06g35160;LOC_Os07g06980;LOC_Os11g13750
LOC_Os04g56060	3	osa-miRf10119-akr osa-miRf10475-akr osa-miRf11750-akr				osa-miRf10844-akr	4	LOC_Os01g70560;LOC_Os02g12690;LOC_Os04g48760;LOC_Os04g58070
LOC_Os05g15520	3	osa-miR1846a-3p osa-miR1846b-3p osa-miR1846c-3p				osa-miRf10874-akr	4	LOC_Os01g43480;LOC_Os03g43590;LOC_Os06g13190;LOC_Os10g38540
LOC_Os05g28170	3	osa-miR1871 osa-miRf10027-akr osa-miRf10028-akr				osa-miRf10894-akr	4	LOC_Os04g53560;LOC_Os05g18294;LOC_Os08g13430;LOC_Os11g25780
LOC_Os05g34700	3	osa-miRf10251-akr osa-miRf10865-akr osa-miRf11154-akr				osa-miRf10896-akr	4	LOC_Os04g53560;LOC_Os05g18294;LOC_Os08g13430;LOC_Os11g25780
LOC_Os05g35266	3	osa-miRf11098-akr osa-miRf11102-akr osa-miRf11106-akr				osa-miRf10916-akr	4	LOC_Os03g16670;LOC_Os03g49440;LOC_Os03g62040;LOC_Os11g30810
LOC_Os05g35400	3	osa-miRf10632-akr osa-miRf11242-akr osa-miRf11656-akr				osa-miRf10926-akr	4	LOC_Os03g61430;LOC_Os05g18294;LOC_Os08g13430;LOC_Os11g25780
LOC_Os05g36160	3	osa-miR1317 osa-miRf10272-akr osa-miRf10273-akr				osa-miRf10927-akr	4	LOC_Os03g58040;LOC_Os05g18294;LOC_Os05g19630;LOC_Os08g13430
LOC_Os05g40200	3	osa-miRf10179-akr osa-miRf10180-akr osa-miRf11355-akr				osa-miRf10936-akr	4	LOC_Os05g18294;LOC_Os08g13430;LOC_Os11g25780;LOC_Os11g41034
LOC_Os05g42240	3	osa-miR159a osa-miR159b osa-miR159m				osa-miRf11002-akr	4	LOC_Os01g65130;LOC_Os06g12790;LOC_Os09g13440;LOC_Os12g12470
LOC_Os05g42350	3	osa-miR441a osa-miR441b osa-miR441c				osa-miRf11014-akr	4	LOC_Os03g57450;LOC_Os04g49510;LOC_Os07g46280;LOC_Os08g34240
LOC_Os05g43860	3	osa-miRf10045-akr osa-miRf10075-akr osa-miRf10087-akr				osa-miRf11015-akr	4	LOC_Os03g31690;LOC_Os03g57450;LOC_Os05g25640;LOC_Os11g37700
LOC_Os05g45820	3	osa-miR816 osa-miRf10406-akr osa-miRf11623-akr				osa-miRf11027-akr	4	LOC_Os01g33800;LOC_Os06g35160;LOC_Os07g06980;LOC_Os11g13750
LOC_Os05g49420	3	osa-miR1848 osa-miRf10941-akr osa-miRf10942-akr				osa-miRf11040-akr	4	LOC_Os07g01820;LOC_Os07g34340;LOC_Os09g32948;LOC_Os10g28600
LOC_Os05g49890	3	osa-miR395c osa-miR395o osa-miR395t				osa-miRf11044-akr	4	LOC_Os05g03610;LOC_Os06g12790;LOC_Os07g22930;LOC_Os10g40740
LOC_Os05g50380	3	osa-miR162b osa-miR162m osa-miRf11377-akr				osa-miRf11060-akr	4	LOC_Os01g12820;LOC_Os04g43290;LOC_Os05g43570;LOC_Os06g39330
LOC_Os06g03690	3	osa-miRf10070-akr osa-miRf10329-akr osa-miRf10495-akr				osa-miRf11080-akr	4	LOC_Os04g53560;LOC_Os05g18294;LOC_Os08g13430;LOC_Os11g25780
LOC_Os06g06780	3	osa-miR1858a osa-miR1858b osa-miRf12007-akr				osa-miRf11149-akr	4	LOC_Os04g53560;LOC_Os05g18294;LOC_Os08g13430;LOC_Os11g25780
LOC_Os06g08310	3	osa-miRf10105-akr osa-miRf10812-akr osa-miRf11526-akr				osa-miRf11160-akr	4	LOC_Os02g16909;LOC_Os04g57560;LOC_Os08g01420;LOC_Os08g43120
LOC_Os06g19400	3	osa-miRf10185-akr osa-miRf10428-akr osa-miRf11837-akr				osa-miRf11164-akr	4	LOC_Os01g33800;LOC_Os07g06980;LOC_Os07g42070;LOC_Os11g20384
LOC_Os06g23870	3	osa-miRf11067-akr osa-miRf11627-akr osa-miRf11998-akr				osa-miRf11168-akr	4	LOC_Os03g16020;LOC_Os04g05010;LOC_Os05g50610;LOC_Os12g23180
LOC_Os06g29430	3	osa-miR1858a osa-miR1858b osa-miRf10832-akr				osa-miRf11169-akr	4	LOC_Os05g18294;LOC_Os08g13430;LOC_Os11g03650;LOC_Os11g25780
LOC_Os06g40640	3	osa-miRf10812-akr osa-miRf11526-akr osa-miRf11613-akr				osa-miRf11175-akr	4	LOC_Os05g18294;LOC_Os05g19630;LOC_Os08g13430;LOC_Os11g25780
LOC_Os06g49890	3	osa-miR1858a osa-miR1858b osa-miRf10863-akr				osa-miRf11179-akr	4	LOC_Os01g11700;LOC_Os04g05010;LOC_Os06g21890;LOC_Os06g36560
LOC_Os07g25810	3	osa-miR444a.2 osa-miR444d.2 osa-miR444e				osa-miRf11181-akr	4	LOC_Os05g01310;LOC_Os05g25640;LOC_Os06g01630;LOC_Os08g35740
LOC_Os07g34640	3	osa-miRf10272-akr osa-miRf10273-akr osa-miRf11613-akr				osa-miRf11203-akr	4	LOC_Os03g12010;LOC_Os03g20420;LOC_Os05g44030;LOC_Os10g21360
LOC_Os07g37560	3	osa-miR1862a osa-miR1862b osa-miR1862c				osa-miRf11210-akr	4	LOC_Os03g45720;LOC_Os03g62790;LOC_Os03g63300;LOC_Os11g33000
LOC_Os07g40800	3	osa-miRf11098-akr osa-miRf11102-akr osa-miRf11106-akr				osa-miRf11216-akr	4	LOC_Os02g03670;LOC_Os06g12790;LOC_Os08g38480;LOC_Os09g13440
LOC_Os07g40940	3	osa-miRf10500-akr osa-miRf10501-akr osa-miRf11026-akr				osa-miRf11226-akr	4	LOC_Os05g18294;LOC_Os05g19630;LOC_Os08g13430;LOC_Os11g25780
LOC_Os07g49210	3	osa-miRf10079-akr osa-miRf10323-akr osa-miRf11862-akr				osa-miRf11262-akr	4	LOC_Os01g33800;LOC_Os06g35160;LOC_Os07g06980;LOC_Os11g13750
LOC_Os08g06380	3	osa-miRf10185-akr osa-miRf10819-akr osa-miRf12029-akr				osa-miRf11303-akr	4	LOC_Os01g68320;LOC_Os04g08270;LOC_Os04g45750;LOC_Os07g43020
LOC_Os08g31510	3	osa-miR1858a osa-miR1858b osa-miR414				osa-miRf11383-akr	4	LOC_Os05g18294;LOC_Os08g13430;LOC_Os11g25780;LOC_Os11g41034
LOC_Os08g33150	3	osa-miRf10223-akr osa-miRf10273-akr osa-miRf10297-akr				osa-miRf11414-akr	4	LOC_Os03g15780;LOC_Os03g50960;LOC_Os07g49300;LOC_Os08g30770
LOC_Os08g36320	3	osa-miR815a osa-miR815b osa-miR815c				osa-miRf11434-akr	4	LOC_Os02g08410;LOC_Os03g29970;LOC_Os07g09680;LOC_Os12g13640
LOC_Os08g40790	3	osa-miRf11098-akr osa-miRf11102-akr osa-miRf11106-akr				osa-miRf11509-akr	4	LOC_Os01g24050;LOC_Os02g08410;LOC_Os03g29970;LOC_Os07g09680
LOC_Os08g41440	3	osa-miR1858a osa-miR1858b osa-miRf10185-akr				osa-miRf11558-akr	4	LOC_Os01g33800;LOC_Os06g35160;LOC_Os07g06980;LOC_Os11g13750
LOC_Os09g07154	3	osa-miRf10218-akr osa-miRf10421-akr osa-miRf11738-akr				osa-miRf11571-akr	4	LOC_Os03g22810;LOC_Os03g25960;LOC_Os03g51900;LOC_Os03g61890
LOC_Os09g23550	3	osa-miRf11829-akr osa-miRf12029-akr osa-miRf12061-akr				osa-miRf11579-akr	4	LOC_Os01g50310;LOC_Os02g17500;LOC_Os06g45140;LOC_Os09g17620
LOC_Os09g26144	3	osa-miRf10060-akr osa-miRf11073-akr osa-miRf11240-akr				osa-miRf11632-akr	4	LOC_Os02g43194;LOC_Os03g59740;LOC_Os08g44340;LOC_Os11g05990
LOC_Os09g31370	3	osa-miRf10458-akr osa-miRf11518-akr osa-miRf12029-akr				osa-miRf11737-akr	4	LOC_Os01g65130;LOC_Os05g07940;LOC_Os06g48030;LOC_Os12g12470
LOC_Os09g32010	3	osa-miRf11083-akr osa-miRf11795-akr osa-miRf12047-akr				osa-miRf11750-akr	4	LOC_Os01g02000;LOC_Os03g07570;LOC_Os04g56060;LOC_Os11g13750
LOC_Os09g32948	3	osa-miRf11040-akr osa-miRf11641-akr osa-miRf12022-akr				osa-miRf11761-akr	4	LOC_Os05g18294;LOC_Os08g13430;LOC_Os11g25780;LOC_Os11g41034
LOC_Os09g35630	3	osa-miRf11572-akr osa-miRf11796-akr osa-miRf12074-akr				osa-miRf11772-akr	4	LOC_Os02g30910;LOC_Os03g27830;LOC_Os05g05280;LOC_Os10g22300
LOC_Os09g38960	3	osa-miRf10000-akr osa-miRf10001-akr osa-miRf10589-akr				osa-miRf11781-akr	4	LOC_Os01g14100;LOC_Os04g35380;LOC_Os04g52606;LOC_Os08g33710
LOC_Os10g21910	3	osa-miRf10646-akr osa-miRf11396-akr osa-miRf11818-akr				osa-miRf11838-akr	4	LOC_Os01g01340;LOC_Os02g01150;LOC_Os02g13300;LOC_Os05g49770
LOC_Os10g32680	3	osa-miR396a osa-miR396b osa-miR396c				osa-miRf11878-akr	4	LOC_Os02g58160;LOC_Os06g21380;LOC_Os11g06720;LOC_Os12g43580
LOC_Os10g33840	3	osa-miR1438 osa-miR444b.1 osa-miR444c.1				osa-miRf11880-akr	4	LOC_Os01g15320;LOC_Os01g66350;LOC_Os04g56210;LOC_Os10g05790
LOC_Os10g35370	3	osa-miRf10806-akr osa-miRf10940-akr osa-miRf11167-akr				osa-miRf11893-akr	4	LOC_Os01g51870;LOC_Os02g17320;LOC_Os03g58580;LOC_Os05g38040
LOC_Os10g35870	3	osa-miR395a osa-miRf10632-akr osa-miRf11026-akr				osa-miRf11936-akr	4	LOC_Os03g07920;LOC_Os03g12010;LOC_Os03g50470;LOC_Os05g40910
LOC_Os10g41310	3	osa-miRf10273-akr osa-miRf11341-akr osa-miRf11538-akr				osa-miRf11974-akr	4	LOC_Os05g18294;LOC_Os08g13430;LOC_Os11g25780;LOC_Os11g41034
LOC_Os11g06720	3	osa-miRf10752-akr osa-miRf11877-akr osa-miRf11878-akr				osa-miRf11990-akr	4	LOC_Os07g08810;LOC_Os07g25700;LOC_Os08g33479;LOC_Os12g06240
LOC_Os11g18044	3	osa-miR1858a osa-miR1858b osa-miRf10060-akr				osa-miRf11992-akr	4	LOC_Os01g43480;LOC_Os06g13190;LOC_Os06g49780;LOC_Os10g38540
LOC_Os11g25160	3	osa-miRf10061-akr osa-miRf10144-akr osa-miRf11295-akr				osa-miRf12022-akr	4	LOC_Os03g20949;LOC_Os05g09050;LOC_Os08g09240;LOC_Os09g32948
LOC_Os11g37900	3	osa-miR414 osa-miRf10185-akr osa-miRf11025-akr				osa-miRf12024-akr	4	LOC_Os01g14100;LOC_Os01g15039;LOC_Os07g09870;LOC_Os12g04650
LOC_Os11g37920	3	osa-miR1438 osa-miRf10593-akr osa-miRf11083-akr				osa-miRf12039-akr	4	LOC_Os03g22050;LOC_Os06g12790;LOC_Os06g48030;LOC_Os09g13440
LOC_Os12g03070	3	osa-miRf11098-akr osa-miRf11102-akr osa-miRf11106-akr				osa-miRf12053-akr	4	LOC_Os01g24470;LOC_Os03g20420;LOC_Os04g01280;LOC_Os05g43910
LOC_Os12g08760	3	osa-miR529b osa-miRf10604-akr osa-miRf12044-akr				osa-miRf12082-akr	4	LOC_Os05g18294;LOC_Os08g13430;LOC_Os11g03650;LOC_Os11g25780
LOC_Os12g29550	3	osa-miR807a osa-miR807b osa-miR807c				osa-miR156a	3	LOC_Os01g69830;LOC_Os07g32170;LOC_Os09g33820
LOC_Os12g38051	3	osa-miR1439 osa-miRf10807-akr osa-miRf11090-akr				osa-miR156b	3	LOC_Os01g69830;LOC_Os07g32170;LOC_Os09g33820
LOC_Os12g39120	3	osa-miR156k osa-miR156r osa-miRf11239-akr				osa-miR156c	3	LOC_Os01g69830;LOC_Os07g32170;LOC_Os09g33820
LOC_Os01g01510	2	osa-miR414 osa-miR426				osa-miR156d	3	LOC_Os01g69830;LOC_Os07g32170;LOC_Os09g33820
LOC_Os01g02000	2	osa-miRf10475-akr osa-miRf11750-akr				osa-miR156e	3	LOC_Os01g69830;LOC_Os07g32170;LOC_Os09g33820
LOC_Os01g05020	2	osa-miRf11440-akr osa-miRf11969-akr				osa-miR156f	3	LOC_Os01g69830;LOC_Os07g32170;LOC_Os09g33820
LOC_Os01g05610	2	osa-miRf10132-akr osa-miRf10144-akr				osa-miR156g	3	LOC_Os01g69830;LOC_Os07g32170;LOC_Os09g33820
LOC_Os01g05900	2	osa-miRf10132-akr osa-miRf10144-akr				osa-miR156h	3	LOC_Os01g69830;LOC_Os07g32170;LOC_Os09g33820
LOC_Os01g05950	2	osa-miRf10132-akr osa-miRf10144-akr				osa-miR156i	3	LOC_Os01g69830;LOC_Os07g32170;LOC_Os09g33820
LOC_Os01g05990	2	osa-miRf10132-akr osa-miRf10144-akr				osa-miR156j	3	LOC_Os01g69830;LOC_Os07g32170;LOC_Os09g33820
LOC_Os01g08660	2	osa-miR1858a osa-miR1858b				osa-miR156k	3	LOC_Os01g69830;LOC_Os07g32170;LOC_Os12g39120
LOC_Os01g09100	2	osa-miRf11829-akr osa-miRf12061-akr				osa-miR156m	3	LOC_Os01g69830;LOC_Os07g32170;LOC_Os09g33820
LOC_Os01g09620	2	osa-miRf10049-akr osa-miRf10051-akr				osa-miR156n	3	LOC_Os01g69830;LOC_Os07g32170;LOC_Os09g33820
LOC_Os01g12690	2	osa-miRf10273-akr osa-miRf11855-akr				osa-miR156o	3	LOC_Os01g69830;LOC_Os03g16690;LOC_Os07g32170
LOC_Os01g13390	2	osa-miRf10406-akr osa-miRf11090-akr				osa-miR156q	3	LOC_Os01g69830;LOC_Os02g26810;LOC_Os07g32170
LOC_Os01g13560	2	osa-miR1439 osa-miRf11090-akr				osa-miR156r	3	LOC_Os01g69830;LOC_Os07g32170;LOC_Os12g39120
LOC_Os01g13690	2	osa-miRf10644-akr osa-miRf11213-akr				osa-miR169b	3	LOC_Os02g53620;LOC_Os03g07880;LOC_Os03g29760
LOC_Os01g15448	2	osa-miRf10885-akr osa-miRf11539-akr				osa-miR169c	3	LOC_Os02g53620;LOC_Os03g07880;LOC_Os03g29760
LOC_Os01g15580	2	osa-miRf10105-akr osa-miRf11765-akr				osa-miR169e	3	LOC_Os02g53620;LOC_Os03g07880;LOC_Os03g29760
LOC_Os01g18050	2	osa-miRf10641-akr osa-miRf11729-akr				osa-miR170a	3	LOC_Os02g44360;LOC_Os02g44370;LOC_Os09g38330
LOC_Os01g21144	2	osa-miR414 osa-miRf11691-akr				osa-miR170b	3	LOC_Os02g44360;LOC_Os02g44370;LOC_Os09g38330
LOC_Os01g25920	2	osa-miR414 osa-miRf10361-akr				osa-miR171b	3	LOC_Os02g44360;LOC_Os02g44370;LOC_Os09g38330
LOC_Os01g31870	2	osa-miRf10603-akr osa-miRf11276-akr				osa-miR171c	3	LOC_Os02g44360;LOC_Os02g44370;LOC_Os09g38330
LOC_Os01g32364	2	osa-miRf10649-akr osa-miRf11159-akr				osa-miR171d	3	LOC_Os02g44360;LOC_Os02g44370;LOC_Os09g38330
LOC_Os01g37590	2	osa-miRf10049-akr osa-miRf10051-akr				osa-miR171e	3	LOC_Os02g44360;LOC_Os02g44370;LOC_Os09g38330
LOC_Os01g39060	2	osa-miRf10627-akr osa-miRf10964-akr				osa-miR171f	3	LOC_Os02g44360;LOC_Os02g44370;LOC_Os09g38330
LOC_Os01g40150	2	osa-miR528 osa-miRf11613-akr				osa-miR171i	3	LOC_Os01g60000;LOC_Os02g44360;LOC_Os02g44370
LOC_Os01g40250	2	osa-miRf10477-akr osa-miRf10662-akr				osa-miR171m	3	LOC_Os02g44360;LOC_Os02g44370;LOC_Os09g38330
LOC_Os01g43580	2	osa-miR2105 osa-miRf12002-akr				osa-miR171n	3	LOC_Os02g44360;LOC_Os02g44370;LOC_Os09g38330
LOC_Os01g43650	2	osa-miRf10272-akr osa-miRf10273-akr				osa-miR395a	3	LOC_Os03g07200;LOC_Os09g31430;LOC_Os10g35870
LOC_Os01g43870	2	osa-miR1858a osa-miR1858b				osa-miR395t	3	LOC_Os03g07200;LOC_Os05g49890;LOC_Os09g31430
LOC_Os01g47490	2	osa-miR1858a osa-miR1858b				osa-miR396f	3	LOC_Os05g44570;LOC_Os06g02560;LOC_Os11g04390
LOC_Os01g47690	2	osa-miRf10273-akr osa-miRf10947-akr				osa-miR399j	3	LOC_Os01g54480;LOC_Os04g33860;LOC_Os05g48390
LOC_Os01g50100	2	osa-miRf10272-akr osa-miRf10273-akr				osa-miR413	3	LOC_Os06g14412;LOC_Os08g13570;LOC_Os08g17400
LOC_Os01g51320	2	osa-miR1848 osa-miRf11073-akr				osa-miR444b.2	3	LOC_Os02g49840;LOC_Os08g33479;LOC_Os10g02920
LOC_Os01g53800	2	osa-miR1858a osa-miR1858b				osa-miR444c.2	3	LOC_Os02g49840;LOC_Os08g33479;LOC_Os10g02920
LOC_Os01g54480	2	osa-miR399i osa-miR399j				osa-miR444d.3	3	LOC_Os01g42330;LOC_Os02g49840;LOC_Os07g04690
LOC_Os01g54930	2	osa-miRf10153-akr osa-miRf10654-akr				osa-miR531	3	LOC_Os03g56869;LOC_Os04g21340;LOC_Os04g55240
LOC_Os01g55240	2	osa-miRf10477-akr osa-miRf11209-akr				osa-miR1424	3	LOC_Os02g04780;LOC_Os04g52940;LOC_Os12g40900
LOC_Os01g58130	2	osa-miRf10272-akr osa-miRf10273-akr				osa-miR1438	3	LOC_Os10g33840;LOC_Os11g04030;LOC_Os11g37920
LOC_Os01g59020	2	osa-miRf10462-akr osa-miRf11073-akr				osa-miR1847.1	3	LOC_Os01g63190;LOC_Os03g01180;LOC_Os03g12450
LOC_Os01g61720	2	osa-miRf11180-akr osa-miRf11267-akr				osa-miR1861a	3	LOC_Os08g09250;LOC_Os08g33479;LOC_Os11g08950
LOC_Os01g62800	2	osa-miRf10223-akr osa-miRf11597-akr				osa-miR1861c	3	LOC_Os01g56780;LOC_Os08g09250;LOC_Os08g32060
LOC_Os01g65080	2	osa-miR2055 osa-miRf12056-akr				osa-miR1861n	3	LOC_Os02g52560;LOC_Os03g03710;LOC_Os05g32680
LOC_Os01g66110	2	osa-miRf10957-akr osa-miRf11518-akr				osa-miR2093-5p	3	LOC_Os02g45054;LOC_Os03g19650;LOC_Os04g53740
LOC_Os01g68370	2	osa-miRf11347-akr osa-miRf12029-akr				osa-miR2098-5p	3	LOC_Os07g39880;LOC_Os08g37940;LOC_Os12g23760
LOC_Os01g68580	2	osa-miRf10807-akr osa-miRf11090-akr				osa-miR2103	3	LOC_Os01g44980;LOC_Os03g12350;LOC_Os06g38594
LOC_Os01g69030	2	osa-miRf10261-akr osa-miRf12002-akr				osa-miRf10032-akr	3	LOC_Os02g08410;LOC_Os03g29970;LOC_Os12g13640
LOC_Os01g69070	2	osa-miRf12007-akr osa-miRf12029-akr				osa-miRf10033-akr	3	LOC_Os01g53000;LOC_Os02g05620;LOC_Os04g52164
LOC_Os01g69904	2	osa-miRf10651-akr osa-miRf11978-akr				osa-miRf10039-akr	3	LOC_Os05g18294;LOC_Os11g25780;LOC_Os11g46860
LOC_Os01g70790	2	osa-miRf10491-akr osa-miRf12017-akr				osa-miRf10065-akr	3	LOC_Os03g09880;LOC_Os05g07820;LOC_Os10g38450
LOC_Os01g71330	2	osa-miRf11095-akr osa-miRf11238-akr				osa-miRf10069-akr	3	LOC_Os03g02160;LOC_Os09g19229;LOC_Os09g27030
LOC_Os01g72250	2	osa-miRf10040-akr osa-miRf10273-akr				osa-miRf10089-akr	3	LOC_Os01g65130;LOC_Os06g48030;LOC_Os12g12470
LOC_Os01g74410	2	osa-miRf10223-akr osa-miRf10273-akr				osa-miRf10114-akr	3	LOC_Os08g07840;LOC_Os08g13430;LOC_Os11g25780
LOC_Os02g01270	2	osa-miR1867 osa-miRf12002-akr				osa-miRf10140-akr	3	LOC_Os01g54080;LOC_Os09g27950;LOC_Os12g12880
LOC_Os02g02040	2	osa-miRf10812-akr osa-miRf11526-akr				osa-miRf10162-akr	3	LOC_Os01g14100;LOC_Os02g55480;LOC_Os07g43020
LOC_Os02g03670	2	osa-miRf10443-akr osa-miRf11216-akr				osa-miRf10164-akr	3	LOC_Os02g14900;LOC_Os04g28420;LOC_Os10g38580
LOC_Os02g04670	2	osa-miRf10615-akr osa-miRf11079-akr				osa-miRf10194-akr	3	LOC_Os04g22360;LOC_Os07g25700;LOC_Os10g14920
LOC_Os02g05890	2	osa-miR1876 osa-miRf11195-akr				osa-miRf10210-akr	3	LOC_Os03g51690;LOC_Os03g58010;LOC_Os05g51190
LOC_Os02g07930	2	osa-miR1848 osa-miRf11518-akr				osa-miRf10222-akr	3	LOC_Os02g39850;LOC_Os03g17590;LOC_Os05g35060
LOC_Os02g15550	2	osa-miRf10553-akr osa-miRf11622-akr				osa-miRf10238-akr	3	LOC_Os04g52940;LOC_Os06g21890;LOC_Os06g35660
LOC_Os02g15860	2	osa-miRf11095-akr osa-miRf11238-akr				osa-miRf10248-akr	3	LOC_Os04g28620;LOC_Os06g08720;LOC_Os08g13430
LOC_Os02g26470	2	osa-miR444b.1 osa-miR444c.1				osa-miRf10263-akr	3	LOC_Os08g07840;LOC_Os08g13430;LOC_Os11g25780
LOC_Os02g26810	2	osa-miR156q osa-miR415				osa-miRf10264-akr	3	LOC_Os04g35100;LOC_Os04g46910;LOC_Os10g21860
LOC_Os02g30900	2	osa-miR1857-5p osa-miRf11806-akr				osa-miRf10279-akr	3	LOC_Os05g18294;LOC_Os08g13430;LOC_Os11g25780
LOC_Os02g30910	2	osa-miRf10446-akr osa-miRf11772-akr				osa-miRf10294-akr	3	LOC_Os05g18294;LOC_Os11g25780;LOC_Os11g46860
LOC_Os02g33890	2	osa-miRf11773-akr osa-miRf11774-akr				osa-miRf10304-akr	3	LOC_Os01g11700;LOC_Os02g09220;LOC_Os02g09240
LOC_Os02g38290	2	osa-miRf11188-akr osa-miRf11856-akr				osa-miRf10323-akr	3	LOC_Os03g50560;LOC_Os06g34700;LOC_Os07g49210
LOC_Os02g39140	2	osa-miRf10273-akr osa-miRf11848-akr				osa-miRf10354-akr	3	LOC_Os05g18294;LOC_Os08g13430;LOC_Os11g25780
LOC_Os02g43780	2	osa-miR1859 osa-miRf10574-akr				osa-miRf10358-akr	3	LOC_Os01g33800;LOC_Os07g06980;LOC_Os11g13750
LOC_Os02g45054	2	osa-miR2093-5p osa-miRf10319-akr				osa-miRf10400-akr	3	LOC_Os01g53920;LOC_Os04g32540;LOC_Os05g07940
LOC_Os02g45250	2	osa-miRf10120-akr osa-miRf11554-akr				osa-miRf10418-akr	3	LOC_Os03g61430;LOC_Os08g13430;LOC_Os11g25780
LOC_Os02g46740	2	osa-miRf10049-akr osa-miRf10051-akr				osa-miRf10441-akr	3	LOC_Os01g24050;LOC_Os02g08410;LOC_Os04g42670
LOC_Os02g46970	2	osa-miRf10272-akr osa-miRf10273-akr				osa-miRf10449-akr	3	LOC_Os01g47070;LOC_Os05g44340;LOC_Os08g30800
LOC_Os02g47950	2	osa-miRf10273-akr osa-miRf12029-akr				osa-miRf10491-akr	3	LOC_Os01g70790;LOC_Os03g40830;LOC_Os09g13680
LOC_Os02g52560	2	osa-miR1861n osa-miRf11530-akr				osa-miRf10553-akr	3	LOC_Os02g15550;LOC_Os05g18294;LOC_Os11g25780
LOC_Os02g52840	2	osa-miRf10423-akr osa-miRf10505-akr				osa-miRf10574-akr	3	LOC_Os02g43780;LOC_Os05g01250;LOC_Os06g21890
LOC_Os02g53530	2	osa-miR1858a osa-miR1858b				osa-miRf10585-akr	3	LOC_Os02g47600;LOC_Os05g18294;LOC_Os08g13430
LOC_Os02g56250	2	osa-miRf10604-akr osa-miRf10632-akr				osa-miRf10589-akr	3	LOC_Os01g59930;LOC_Os03g64140;LOC_Os09g38960
LOC_Os02g56600	2	osa-miR2102-3p osa-miRf11513-akr				osa-miRf10599-akr	3	LOC_Os05g18294;LOC_Os11g25780;LOC_Os11g46860
LOC_Os02g57140	2	osa-miR1858a osa-miR1858b				osa-miRf10608-akr	3	LOC_Os08g09250;LOC_Os08g13430;LOC_Os11g25780
LOC_Os02g57210	2	osa-miRf10185-akr osa-miRf11613-akr				osa-miRf10617-akr	3	LOC_Os02g58790;LOC_Os03g20420;LOC_Os10g41410
LOC_Os03g01180	2	osa-miR1847.1 osa-miRf12002-akr				osa-miRf10618-akr	3	LOC_Os02g58790;LOC_Os03g11910;LOC_Os03g20420
LOC_Os03g03450	2	osa-miR2104 osa-miRf10273-akr				osa-miRf10670-akr	3	LOC_Os05g18294;LOC_Os11g25780;LOC_Os11g46860
LOC_Os03g04660	2	osa-miR1427 osa-miRf10386-akr				osa-miRf10717-akr	3	LOC_Os05g18294;LOC_Os05g19630;LOC_Os08g13430
LOC_Os03g04920	2	osa-miR2095-3p osa-miR414				osa-miRf10752-akr	3	LOC_Os11g06720;LOC_Os12g06850;LOC_Os12g07030
LOC_Os03g05740	2	osa-miRf11829-akr osa-miRf12061-akr				osa-miRf10756-akr	3	LOC_Os01g62900;LOC_Os01g65660;LOC_Os03g07570
LOC_Os03g10620	2	osa-miRf10319-akr osa-miRf11114-akr				osa-miRf10760-akr	3	LOC_Os04g11970;LOC_Os05g07820;LOC_Os05g33960
LOC_Os03g11660	2	osa-miRf10245-akr osa-miRf11513-akr				osa-miRf10786-akr	3	LOC_Os02g57100;LOC_Os04g24294;LOC_Os04g42784
LOC_Os03g11910	2	osa-miRf10618-akr osa-miRf10804-akr				osa-miRf10803-akr	3	LOC_Os02g58790;LOC_Os03g20420;LOC_Os07g32420
LOC_Os03g12690	2	osa-miRf10273-akr osa-miRf12007-akr				osa-miRf10820-akr	3	LOC_Os01g11710;LOC_Os01g43480;LOC_Os06g13190
LOC_Os03g12900	2	osa-miRf11310-akr osa-miRf11320-akr				osa-miRf10822-akr	3	LOC_Os01g65860;LOC_Os02g38386;LOC_Os08g30770
LOC_Os03g13840	2	osa-miRf11829-akr osa-miRf12061-akr				osa-miRf10829-akr	3	LOC_Os03g39610;LOC_Os07g42730;LOC_Os10g31830
LOC_Os03g16610	2	osa-miR397a osa-miR397b				osa-miRf10842-akr	3	LOC_Os03g48380;LOC_Os06g48060;LOC_Os09g33690
LOC_Os03g16670	2	osa-miRf10916-akr osa-miRf11013-akr				osa-miRf10935-akr	3	LOC_Os07g07974;LOC_Os08g13430;LOC_Os11g25780
LOC_Os03g16920	2	osa-miRf10272-akr osa-miRf10273-akr				osa-miRf10957-akr	3	LOC_Os01g13280;LOC_Os01g66110;LOC_Os10g40260
LOC_Os03g19250	2	osa-miRf10450-akr osa-miRf11349-akr				osa-miRf10970-akr	3	LOC_Os01g54520;LOC_Os05g47960;LOC_Os09g26780
LOC_Os03g19452	2	osa-miRf10819-akr osa-miRf11045-akr				osa-miRf10983-akr	3	LOC_Os05g18294;LOC_Os05g19630;LOC_Os08g13430
LOC_Os03g20120	2	osa-miRf10812-akr osa-miRf11526-akr				osa-miRf11024-akr	3	LOC_Os01g15000;LOC_Os01g51920;LOC_Os04g43660
LOC_Os03g20870	2	osa-miRf10458-akr osa-miRf12002-akr				osa-miRf11053-akr	3	LOC_Os04g48310;LOC_Os07g10840;LOC_Os09g38090
LOC_Os03g20949	2	osa-miRf10615-akr osa-miRf12022-akr				osa-miRf11071-akr	3	LOC_Os05g18294;LOC_Os05g19630;LOC_Os08g13430
LOC_Os03g22120	2	osa-miRf10009-akr osa-miRf10385-akr				osa-miRf11079-akr	3	LOC_Os02g04670;LOC_Os03g03990;LOC_Os03g13820
LOC_Os03g22634	2	osa-miRf11793-akr osa-miRf12048-akr				osa-miRf11082-akr	3	LOC_Os03g43590;LOC_Os06g13190;LOC_Os10g38540
LOC_Os03g22780	2	osa-miR1858a osa-miR1858b				osa-miRf11124-akr	3	LOC_Os05g18294;LOC_Os05g19630;LOC_Os08g13430
LOC_Os03g29930	2	osa-miR1858a osa-miR1858b				osa-miRf11129-akr	3	LOC_Os06g13190;LOC_Os10g38540;LOC_Os12g25180
LOC_Os03g31690	2	osa-miRf10793-akr osa-miRf11015-akr				osa-miRf11143-akr	3	LOC_Os01g63230;LOC_Os07g38930;LOC_Os08g39694
LOC_Os03g37120	2	osa-miRf11829-akr osa-miRf12061-akr				osa-miRf11147-akr	3	LOC_Os06g43210;LOC_Os06g48030;LOC_Os09g33690
LOC_Os03g39020	2	osa-miRf11095-akr osa-miRf11950-akr				osa-miRf11159-akr	3	LOC_Os01g32364;LOC_Os06g09679;LOC_Os08g41390
LOC_Os03g41460	2	osa-miRf10781-akr osa-miRf11299-akr				osa-miRf11167-akr	3	LOC_Os06g47580;LOC_Os10g31040;LOC_Os10g35370
LOC_Os03g45340	2	osa-miRf10255-akr osa-miRf10481-akr				osa-miRf11170-akr	3	LOC_Os03g08840;LOC_Os04g46910;LOC_Os08g01170
LOC_Os03g48180	2	osa-miR168a osa-miR168m				osa-miRf11171-akr	3	LOC_Os04g05010;LOC_Os06g21890;LOC_Os06g36560
LOC_Os03g49940	2	osa-miRf10765-akr osa-miRf12029-akr				osa-miRf11224-akr	3	LOC_Os05g18294;LOC_Os11g25780;LOC_Os11g46860
LOC_Os03g51690	2	osa-miRf10210-akr osa-miRf10778-akr				osa-miRf11225-akr	3	LOC_Os08g07840;LOC_Os08g13430;LOC_Os11g25780
LOC_Os03g52070	2	osa-miRf10273-akr osa-miRf10947-akr				osa-miRf11272-akr	3	LOC_Os08g09250;LOC_Os09g19790;LOC_Os11g25780
LOC_Os03g52840	2	osa-miR530-5p osa-miRf11773-akr				osa-miRf11285-akr	3	LOC_Os02g11740;LOC_Os03g37490;LOC_Os06g12310
LOC_Os03g53750	2	osa-miRf10272-akr osa-miRf10273-akr				osa-miRf11298-akr	3	LOC_Os08g13430;LOC_Os11g25780;LOC_Os11g41034
LOC_Os03g53910	2	osa-miRf11538-akr osa-miRf11570-akr				osa-miRf11307-akr	3	LOC_Os08g07840;LOC_Os08g13430;LOC_Os11g25780
LOC_Os03g54050	2	osa-miRf10322-akr osa-miRf11026-akr				osa-miRf11403-akr	3	LOC_Os05g19630;LOC_Os08g13430;LOC_Os11g25780
LOC_Os03g56060	2	osa-miR1858a osa-miR1858b				osa-miRf11407-akr	3	LOC_Os01g53910;LOC_Os07g36544;LOC_Os07g36800
LOC_Os03g56280	2	osa-miR444a.1 osa-miR444d.1				osa-miRf11408-akr	3	LOC_Os03g54084;LOC_Os09g04050;LOC_Os09g25150
LOC_Os03g56370	2	osa-miR162b osa-miR162m				osa-miRf11431-akr	3	LOC_Os05g18294;LOC_Os11g25780;LOC_Os11g46860
LOC_Os03g56830	2	osa-miRf10855-akr osa-miRf11133-akr				osa-miRf11440-akr	3	LOC_Os01g05020;LOC_Os03g03034;LOC_Os03g46120
LOC_Os03g56869	2	osa-miR531 osa-miR531b				osa-miRf11476-akr	3	LOC_Os02g57100;LOC_Os04g24294;LOC_Os04g42784
LOC_Os03g57960	2	osa-miRf10812-akr osa-miRf11526-akr				osa-miRf11490-akr	3	LOC_Os08g07840;LOC_Os08g13430;LOC_Os11g25780
LOC_Os03g62170	2	osa-miRf11506-akr osa-miRf11507-akr				osa-miRf11502-akr	3	LOC_Os03g30250;LOC_Os09g19970;LOC_Os12g18150
LOC_Os03g62780	2	osa-miR444a.1 osa-miR444d.1				osa-miRf11504-akr	3	LOC_Os02g08410;LOC_Os03g22050;LOC_Os03g29970
LOC_Os04g11400	2	osa-miRf11064-akr osa-miRf11366-akr				osa-miRf11514-akr	3	LOC_Os02g08410;LOC_Os05g51670;LOC_Os09g37180
LOC_Os04g21340	2	osa-miR531 osa-miR531b				osa-miRf11573-akr	3	LOC_Os01g33800;LOC_Os07g06980;LOC_Os11g13750
LOC_Os04g27950	2	osa-miRf10577-akr osa-miRf10578-akr				osa-miRf11586-akr	3	LOC_Os02g58000;LOC_Os07g06980;LOC_Os11g13750
LOC_Os04g28420	2	osa-miR529b osa-miRf10164-akr				osa-miRf11594-akr	3	LOC_Os05g18294;LOC_Os05g19630;LOC_Os08g13430
LOC_Os04g32790	2	osa-miRf10273-akr osa-miRf10519-akr				osa-miRf11625-akr	3	LOC_Os08g09250;LOC_Os09g19790;LOC_Os11g25780
LOC_Os04g32980	2	osa-miRf11347-akr osa-miRf11629-akr				osa-miRf11635-akr	3	LOC_Os08g07840;LOC_Os08g13430;LOC_Os11g25780
LOC_Os04g36050	2	osa-miRf11192-akr osa-miRf12038-akr				osa-miRf11679-akr	3	LOC_Os08g07840;LOC_Os08g13430;LOC_Os11g25780
LOC_Os04g36800	2	osa-miR1846a-3p osa-miR1846b-3p				osa-miRf11693-akr	3	LOC_Os01g14100;LOC_Os01g15039;LOC_Os04g54080
LOC_Os04g37700	2	osa-miRf10273-akr osa-miRf11025-akr				osa-miRf11701-akr	3	LOC_Os05g03174;LOC_Os06g13190;LOC_Os10g38540
LOC_Os04g38220	2	osa-miRf11073-akr osa-miRf11381-akr				osa-miRf11742-akr	3	LOC_Os01g52660;LOC_Os06g50080;LOC_Os09g26960
LOC_Os04g40940	2	osa-miRf10781-akr osa-miRf12044-akr				osa-miRf11746-akr	3	LOC_Os05g18294;LOC_Os06g10580;LOC_Os11g25780
LOC_Os04g41900	2	osa-miR1858a osa-miR1858b				osa-miRf11778-akr	3	LOC_Os06g21890;LOC_Os06g36560;LOC_Os09g23530
LOC_Os04g42310	2	osa-miRf10031-akr osa-miRf10620-akr				osa-miRf11791-akr	3	LOC_Os01g43480;LOC_Os06g13190;LOC_Os08g24390
LOC_Os04g44780	2	osa-miRf10863-akr osa-miRf12029-akr				osa-miRf11805-akr	3	LOC_Os06g13190;LOC_Os10g38540;LOC_Os12g25180
LOC_Os04g46910	2	osa-miRf10264-akr osa-miRf11170-akr				osa-miRf11814-akr	3	LOC_Os01g03490;LOC_Os02g55480;LOC_Os07g43020
LOC_Os04g48390	2	osa-miR827a osa-miR827b				osa-miRf11866-akr	3	LOC_Os05g18294;LOC_Os05g19630;LOC_Os08g13430
LOC_Os04g49510	2	osa-miRf10452-akr osa-miRf11014-akr				osa-miRf11872-akr	3	LOC_Os04g56240;LOC_Os04g56680;LOC_Os10g10180
LOC_Os04g49757	2	osa-miRf10496-akr osa-miRf10899-akr				osa-miRf11914-akr	3	LOC_Os05g18294;LOC_Os08g13430;LOC_Os11g25780
LOC_Os04g52940	2	osa-miR1424 osa-miRf10238-akr				osa-miRf11937-akr	3	LOC_Os03g12010;LOC_Os03g50470;LOC_Os05g40910
LOC_Os04g53740	2	osa-miR2093-5p osa-miRf10834-akr				osa-miRf11938-akr	3	LOC_Os02g15750;LOC_Os02g45930;LOC_Os12g40900
LOC_Os04g54210	2	osa-miRf10272-akr osa-miRf10273-akr				osa-miRf11963-akr	3	LOC_Os05g18294;LOC_Os11g25780;LOC_Os11g41034
LOC_Os04g55620	2	osa-miRf10049-akr osa-miRf10051-akr				osa-miRf11966-akr	3	LOC_Os08g09250;LOC_Os09g19790;LOC_Os11g25780
LOC_Os04g55970	2	osa-miRf11853-akr osa-miRf11854-akr				osa-miRf11969-akr	3	LOC_Os01g05020;LOC_Os07g36390;LOC_Os08g31950
LOC_Os04g56240	2	osa-miRf10273-akr osa-miRf11872-akr				osa-miRf11991-akr	3	LOC_Os01g43480;LOC_Os06g13190;LOC_Os10g38540
LOC_Os04g56790	2	osa-miRf10819-akr osa-miRf11345-akr				osa-miRf12001-akr	3	LOC_Os02g08410;LOC_Os02g41954;LOC_Os09g37180
LOC_Os04g58280	2	osa-miR1858a osa-miR1858b				osa-miRf12023-akr	3	LOC_Os06g06080;LOC_Os09g33690;LOC_Os12g43110
LOC_Os04g58734	2	osa-miR393 osa-miR393b				osa-miRf12056-akr	3	LOC_Os01g65080;LOC_Os04g08270;LOC_Os07g43020
LOC_Os04g59540	2	osa-miR166i osa-miR166j				osa-miRf12059-akr	3	LOC_Os05g18294;LOC_Os11g25780;LOC_Os11g46860
LOC_Os05g02250	2	osa-miR2100-5p osa-miRf10476-akr				osa-miRf12060-akr	3	LOC_Os08g07840;LOC_Os08g13430;LOC_Os11g25780
LOC_Os05g04680	2	osa-miRf10273-akr osa-miRf10947-akr				osa-miRf12064-akr	3	LOC_Os05g18294;LOC_Os08g13430;LOC_Os11g25780
LOC_Os05g05600	2	osa-miRf10261-akr osa-miRf10791-akr				osa-miRf12066-akr	3	LOC_Os05g18294;LOC_Os05g19630;LOC_Os08g13430
LOC_Os05g06890	2	osa-miRf10819-akr osa-miRf10947-akr				osa-miRf12086-akr	3	LOC_Os02g57100;LOC_Os04g24294;LOC_Os04g42784
LOC_Os05g08450	2	osa-miR2104 osa-miRf10839-akr				osa-miR156l	2	LOC_Os01g69830;LOC_Os07g32170
LOC_Os05g12400	2	osa-miR1861d osa-miRf11090-akr				osa-miR162b	2	LOC_Os03g56370;LOC_Os05g50380
LOC_Os05g12770	2	osa-miR444b.1 osa-miR444c.1				osa-miR162m	2	LOC_Os03g56370;LOC_Os05g50380
LOC_Os05g19030	2	osa-miR1848 osa-miRf10226-akr				osa-miR166i	2	LOC_Os04g42090;LOC_Os04g59540
LOC_Os05g23610	2	osa-miR1848 osa-miR414				osa-miR166j	2	LOC_Os04g42090;LOC_Os04g59540
LOC_Os05g25640	2	osa-miRf11015-akr osa-miRf11181-akr				osa-miR169n	2	LOC_Os02g53620;LOC_Os03g48970
LOC_Os05g28520	2	osa-miRf10319-akr osa-miRf11240-akr				osa-miR169o	2	LOC_Os02g53620;LOC_Os03g48970
LOC_Os05g29710	2	osa-miRf10063-akr osa-miRf10273-akr				osa-miR171a	2	LOC_Os02g44360;LOC_Os02g44370
LOC_Os05g29760	2	osa-miRf10807-akr osa-miRf10811-akr				osa-miR393	2	LOC_Os03g52320;LOC_Os04g58734
LOC_Os05g31620	2	osa-miRf10185-akr osa-miRf10773-akr				osa-miR393b	2	LOC_Os03g52320;LOC_Os04g58734
LOC_Os05g31910	2	osa-miRf10272-akr osa-miRf10273-akr				osa-miR395c	2	LOC_Os03g07200;LOC_Os05g49890
LOC_Os05g33110	2	osa-miRf10855-akr osa-miRf11050-akr				osa-miR395o	2	LOC_Os03g07200;LOC_Os05g49890
LOC_Os05g35140	2	osa-miRf10063-akr osa-miRf11025-akr				osa-miR396a	2	LOC_Os06g02560;LOC_Os10g32680
LOC_Os05g35440	2	osa-miRf10223-akr osa-miRf11095-akr				osa-miR396b	2	LOC_Os06g02560;LOC_Os10g32680
LOC_Os05g36010	2	osa-miRf10272-akr osa-miRf10273-akr				osa-miR396c	2	LOC_Os06g02560;LOC_Os10g32680
LOC_Os05g37450	2	osa-miRf11209-akr osa-miRf11815-akr				osa-miR396d	2	LOC_Os06g02560;LOC_Os06g03980
LOC_Os05g38420	2	osa-miR397a osa-miR397b				osa-miR396e	2	LOC_Os06g02560;LOC_Os06g03980
LOC_Os05g41070	2	osa-miRf11114-akr osa-miRf12002-akr				osa-miR398a	2	LOC_Os01g68770;LOC_Os07g46990
LOC_Os05g41200	2	osa-miRf10520-akr osa-miRf12049-akr				osa-miR399a	2	LOC_Os04g33860;LOC_Os05g48390
LOC_Os05g43310	2	osa-miRf10272-akr osa-miRf10273-akr				osa-miR399b	2	LOC_Os04g33860;LOC_Os05g48390
LOC_Os05g44070	2	osa-miRf11042-akr osa-miRf11043-akr				osa-miR399c	2	LOC_Os04g33860;LOC_Os05g48390
LOC_Os05g47640	2	osa-miR1858a osa-miR1858b				osa-miR399d	2	LOC_Os04g33860;LOC_Os05g48390
LOC_Os05g48800	2	osa-miR156p osa-miRf10111-akr				osa-miR399e	2	LOC_Os04g33860;LOC_Os05g48390
LOC_Os05g49010	2	osa-miRf10273-akr osa-miRf11073-akr				osa-miR399f	2	LOC_Os04g33860;LOC_Os05g48390
LOC_Os05g51070	2	osa-miRf10272-akr osa-miRf10273-akr				osa-miR399g	2	LOC_Os04g33860;LOC_Os05g48390
LOC_Os05g51150	2	osa-miR394 osa-miRf10344-akr				osa-miR443	2	LOC_Os10g40710;LOC_Os11g42970
LOC_Os06g01360	2	osa-miRf11773-akr osa-miRf11774-akr				osa-miR444f	2	LOC_Os02g49840;LOC_Os08g33479
LOC_Os06g02000	2	osa-miR415 osa-miRf11774-akr				osa-miR528	2	LOC_Os01g40150;LOC_Os06g06050
LOC_Os06g03980	2	osa-miR396d osa-miR396e				osa-miR807a	2	LOC_Os03g45990;LOC_Os12g29550
LOC_Os06g05320	2	osa-miRf10715-akr osa-miRf11861-akr				osa-miR807b	2	LOC_Os03g45990;LOC_Os12g29550
LOC_Os06g06290	2	osa-miRf10273-akr osa-miRf10458-akr				osa-miR807c	2	LOC_Os03g45990;LOC_Os12g29550
LOC_Os06g07600	2	osa-miRf11240-akr osa-miRf11985-akr				osa-miR827a	2	LOC_Os02g45520;LOC_Os04g48390
LOC_Os06g08014	2	osa-miRf10620-akr osa-miRf11656-akr				osa-miR827b	2	LOC_Os02g45520;LOC_Os04g48390
LOC_Os06g09679	2	osa-miRf10984-akr osa-miRf11159-akr				osa-miR1432	2	LOC_Os04g51610;LOC_Os08g36910
LOC_Os06g14050	2	osa-miRf10807-akr osa-miRf11090-akr				osa-miR1435	2	LOC_Os03g48320;LOC_Os04g42444
LOC_Os06g14810	2	osa-miR1427 osa-miRf11341-akr				osa-miR1846c-3p	2	LOC_Os05g15520;LOC_Os07g04220
LOC_Os06g15330	2	osa-miRf10481-akr osa-miRf10605-akr				osa-miR1854-5p	2	LOC_Os08g30020;LOC_Os12g17550
LOC_Os06g20200	2	osa-miRf11597-akr osa-miRf11911-akr				osa-miR1860-3p	2	LOC_Os02g53810;LOC_Os12g17550
LOC_Os06g21480	2	osa-miRf10819-akr osa-miRf11741-akr				osa-miR1861h	2	LOC_Os09g09500;LOC_Os12g01030
LOC_Os06g24070	2	osa-miRf10462-akr osa-miRf11073-akr				osa-miR1861j	2	LOC_Os09g09500;LOC_Os12g01030
LOC_Os06g30130	2	osa-miR1858a osa-miR1858b				osa-miR1862e	2	LOC_Os03g52280;LOC_Os08g31030
LOC_Os06g34390	2	osa-miRf10272-akr osa-miRf10273-akr				osa-miR1866-3p	2	LOC_Os09g21110;LOC_Os12g42220
LOC_Os06g40180	2	osa-miRf10079-akr osa-miRf10481-akr				osa-miR1867	2	LOC_Os02g01270;LOC_Os11g41034
LOC_Os06g41060	2	osa-miRf10446-akr osa-miRf10447-akr				osa-miR1879	2	LOC_Os02g39570;LOC_Os12g17550
LOC_Os06g43090	2	osa-miRf10272-akr osa-miRf10273-akr				osa-miR2091-5p	2	LOC_Os05g24150;LOC_Os06g48300
LOC_Os06g44200	2	osa-miRf10226-akr osa-miRf12007-akr				osa-miR2100-5p	2	LOC_Os03g31320;LOC_Os05g02250
LOC_Os06g45090	2	osa-miR1858a osa-miR1858b				osa-miR2105	2	LOC_Os01g43580;LOC_Os05g14270
LOC_Os06g48200	2	osa-miRf10273-akr osa-miRf10947-akr				osa-miRf10000-akr	2	LOC_Os01g59930;LOC_Os09g38960
LOC_Os06g48680	2	osa-miRf10947-akr osa-miRf11518-akr				osa-miRf10001-akr	2	LOC_Os01g59930;LOC_Os09g38960
LOC_Os06g50080	2	osa-miRf11742-akr osa-miRf12029-akr				osa-miRf10002-akr	2	LOC_Os09g39570;LOC_Os10g42690
LOC_Os06g51220	2	osa-miR1858a osa-miR1858b				osa-miRf10003-akr	2	LOC_Os08g13430;LOC_Os11g25780
LOC_Os07g01820	2	osa-miRf10319-akr osa-miRf11040-akr				osa-miRf10004-akr	2	LOC_Os05g18294;LOC_Os08g13430
LOC_Os07g04110	2	osa-miRf10063-akr osa-miRf10458-akr				osa-miRf10005-akr	2	LOC_Os07g43390;LOC_Os11g25780
LOC_Os07g04220	2	osa-miR1846c-3p osa-miRf10734-akr				osa-miRf10007-akr	2	LOC_Os10g35470;LOC_Os11g41034
LOC_Os07g04840	2	osa-miR1858a osa-miR1858b				osa-miRf10025-akr	2	LOC_Os01g53920;LOC_Os05g07940
LOC_Os07g04990	2	osa-miRf10455-akr osa-miRf11190-akr				osa-miRf10026-akr	2	LOC_Os04g32540;LOC_Os06g48030
LOC_Os07g06060	2	osa-miRf10458-akr osa-miRf12002-akr				osa-miRf10030-akr	2	LOC_Os05g18294;LOC_Os08g13430
LOC_Os07g07410	2	osa-miRf10462-akr osa-miRf11073-akr				osa-miRf10034-akr	2	LOC_Os08g13430;LOC_Os10g34480
LOC_Os07g07540	2	osa-miRf10273-akr osa-miRf10947-akr				osa-miRf10040-akr	2	LOC_Os01g72250;LOC_Os07g03730
LOC_Os07g07900	2	osa-miRf10947-akr osa-miRf11026-akr				osa-miRf10042-akr	2	LOC_Os10g35470;LOC_Os11g41034
LOC_Os07g07990	2	osa-miRf10063-akr osa-miRf10185-akr				osa-miRf10044-akr	2	LOC_Os07g32170;LOC_Os07g42714
LOC_Os07g08710	2	osa-miRf10604-akr osa-miRf11093-akr				osa-miRf10048-akr	2	LOC_Os08g13430;LOC_Os11g25780
LOC_Os07g10410	2	osa-miRf11221-akr osa-miRf11513-akr				osa-miRf10052-akr	2	LOC_Os10g35470;LOC_Os11g41034
LOC_Os07g22930	2	osa-miRf11044-akr osa-miRf11090-akr				osa-miRf10057-akr	2	LOC_Os07g43390;LOC_Os11g25780
LOC_Os07g27320	2	osa-miR156p osa-miRf10413-akr				osa-miRf10059-akr	2	LOC_Os05g18294;LOC_Os08g13430
LOC_Os07g29320	2	osa-miR414 osa-miRf10361-akr				osa-miRf10064-akr	2	LOC_Os08g13430;LOC_Os11g25780
LOC_Os07g32570	2	osa-miRf10049-akr osa-miRf10051-akr				osa-miRf10078-akr	2	LOC_Os10g35470;LOC_Os11g41034
LOC_Os07g33620	2	osa-miRf10462-akr osa-miRf11341-akr				osa-miRf10080-akr	2	LOC_Os08g13430;LOC_Os11g25780
LOC_Os07g36570	2	osa-miRf10808-akr osa-miRf10809-akr				osa-miRf10084-akr	2	LOC_Os03g02210;LOC_Os06g19630
LOC_Os07g37850	2	osa-miR2102-5p osa-miRf11917-akr				osa-miRf10088-akr	2	LOC_Os07g32170;LOC_Os07g42714
LOC_Os07g38930	2	osa-miRf10984-akr osa-miRf11143-akr				osa-miRf10090-akr	2	LOC_Os05g18294;LOC_Os08g13430
LOC_Os07g39880	2	osa-miR2098-5p osa-miRf11983-akr				osa-miRf10097-akr	2	LOC_Os01g39830;LOC_Os02g49600
LOC_Os07g42940	2	osa-miR1858a osa-miR1858b				osa-miRf10102-akr	2	LOC_Os10g35470;LOC_Os11g41034
LOC_Os07g44190	2	osa-miRf10462-akr osa-miRf11073-akr				osa-miRf10108-akr	2	LOC_Os05g28300;LOC_Os05g37160
LOC_Os07g44330	2	osa-miRf10290-akr osa-miRf11017-akr				osa-miRf10111-akr	2	LOC_Os05g48800;LOC_Os07g32170
LOC_Os07g44410	2	osa-miRf10812-akr osa-miRf11526-akr				osa-miRf10112-akr	2	LOC_Os05g18294;LOC_Os08g13430
LOC_Os07g46240	2	osa-miR1858a osa-miR1858b				osa-miRf10117-akr	2	LOC_Os05g18294;LOC_Os08g13430
LOC_Os07g46990	2	osa-miR398a osa-miR398b				osa-miRf10120-akr	2	LOC_Os02g45250;LOC_Os06g35160
LOC_Os07g49070	2	osa-miRf10063-akr osa-miRf10863-akr				osa-miRf10123-akr	2	LOC_Os01g26120;LOC_Os08g43120
LOC_Os07g49460	2	osa-miR414 osa-miRf11623-akr				osa-miRf10125-akr	2	LOC_Os05g18294;LOC_Os08g13430
LOC_Os08g02230	2	osa-miRf11212-akr osa-miRf11612-akr				osa-miRf10129-akr	2	LOC_Os08g09250;LOC_Os08g13430
LOC_Os08g02700	2	osa-miR531b osa-miRf10185-akr				osa-miRf10133-akr	2	LOC_Os05g18294;LOC_Os11g25780
LOC_Os08g12780	2	osa-miRf10519-akr osa-miRf11033-akr				osa-miRf10150-akr	2	LOC_Os06g44060;LOC_Os07g18162
LOC_Os08g13570	2	osa-miR413 osa-miRf10620-akr				osa-miRf10156-akr	2	LOC_Os08g13430;LOC_Os11g25780
LOC_Os08g17400	2	osa-miR413 osa-miRf11615-akr				osa-miRf10158-akr	2	LOC_Os04g55230;LOC_Os05g48390
LOC_Os08g18974	2	osa-miRf11289-akr osa-miRf11521-akr				osa-miRf10160-akr	2	LOC_Os05g18294;LOC_Os08g13430
LOC_Os08g20570	2	osa-miRf10060-akr osa-miRf11145-akr				osa-miRf10171-akr	2	LOC_Os06g06080;LOC_Os11g35400
LOC_Os08g24390	2	osa-miRf11614-akr osa-miRf11791-akr				osa-miRf10184-akr	2	LOC_Os03g58040;LOC_Os09g26170
LOC_Os08g29170	2	osa-miRf10319-akr osa-miRf10508-akr				osa-miRf10186-akr	2	LOC_Os04g35380;LOC_Os04g45750
LOC_Os08g30770	2	osa-miRf10822-akr osa-miRf11414-akr				osa-miRf10191-akr	2	LOC_Os05g18294;LOC_Os08g13430
LOC_Os08g32060	2	osa-miR1861c osa-miR1861g				osa-miRf10196-akr	2	LOC_Os10g35470;LOC_Os11g41034
LOC_Os08g32120	2	osa-miRf10049-akr osa-miRf10051-akr				osa-miRf10198-akr	2	LOC_Os05g18294;LOC_Os08g13430
LOC_Os08g33710	2	osa-miRf11051-akr osa-miRf11781-akr				osa-miRf10203-akr	2	LOC_Os06g13190;LOC_Os10g38540
LOC_Os08g34700	2	osa-miRf10063-akr osa-miRf10496-akr				osa-miRf10213-akr	2	LOC_Os01g07630;LOC_Os08g01840
LOC_Os08g35620	2	osa-miRf10272-akr osa-miRf10273-akr				osa-miRf10217-akr	2	LOC_Os05g18294;LOC_Os08g13430
LOC_Os08g37350	2	osa-miRf10863-akr osa-miRf11267-akr				osa-miRf10219-akr	2	LOC_Os06g21890;LOC_Os06g36560
LOC_Os08g37670	2	osa-miR408 osa-miR414				osa-miRf10224-akr	2	LOC_Os08g07290;LOC_Os12g17550
LOC_Os08g38300	2	osa-miRf10132-akr osa-miRf10144-akr				osa-miRf10228-akr	2	LOC_Os01g48910;LOC_Os04g38680
LOC_Os08g38560	2	osa-miRf10280-akr osa-miRf11621-akr				osa-miRf10229-akr	2	LOC_Os03g22050;LOC_Os09g37540
LOC_Os08g38810	2	osa-miRf10498-akr osa-miRf10915-akr				osa-miRf10234-akr	2	LOC_Os08g13430;LOC_Os11g25780
LOC_Os08g39550	2	osa-miRf11278-akr osa-miRf11856-akr				osa-miRf10251-akr	2	LOC_Os05g34700;LOC_Os07g36170
LOC_Os08g39694	2	osa-miRf10556-akr osa-miRf11143-akr				osa-miRf10255-akr	2	LOC_Os03g06410;LOC_Os03g45340
LOC_Os08g42020	2	osa-miR1846a-3p osa-miR1846b-3p				osa-miRf10256-akr	2	LOC_Os01g01340;LOC_Os07g39310
LOC_Os08g42420	2	osa-miR1858a osa-miR1858b				osa-miRf10266-akr	2	LOC_Os06g08720;LOC_Os08g13430
LOC_Os08g43500	2	osa-miRf10427-akr osa-miRf11039-akr				osa-miRf10267-akr	2	LOC_Os04g49550;LOC_Os10g41040
LOC_Os08g44340	2	osa-miRf11632-akr osa-miRf11656-akr				osa-miRf10269-akr	2	LOC_Os08g13430;LOC_Os11g25780
LOC_Os09g04160	2	osa-miRf10458-akr osa-miRf11773-akr				osa-miRf10285-akr	2	LOC_Os05g18294;LOC_Os08g13430
LOC_Os09g07900	2	osa-miRf10523-akr osa-miRf10545-akr				osa-miRf10287-akr	2	LOC_Os05g18294;LOC_Os08g13430
LOC_Os09g15680	2	osa-miRf11538-akr osa-miRf11613-akr				osa-miRf10291-akr	2	LOC_Os05g18294;LOC_Os08g13430
LOC_Os09g17152	2	osa-miRf11025-akr osa-miRf11843-akr				osa-miRf10293-akr	2	LOC_Os01g66290;LOC_Os04g48950
LOC_Os09g20000	2	osa-miRf10406-akr osa-miRf11090-akr				osa-miRf10295-akr	2	LOC_Os05g18294;LOC_Os08g13430
LOC_Os09g20480	2	osa-miR414 osa-miRf11341-akr				osa-miRf10298-akr	2	LOC_Os01g40980;LOC_Os10g01640
LOC_Os09g21110	2	osa-miR1866-3p osa-miRf11622-akr				osa-miRf10301-akr	2	LOC_Os01g72990;LOC_Os12g37530
LOC_Os09g23530	2	osa-miRf10022-akr osa-miRf11778-akr				osa-miRf10303-akr	2	LOC_Os08g13430;LOC_Os11g25780
LOC_Os09g25150	2	osa-miR2102-3p osa-miRf11408-akr				osa-miRf10314-akr	2	LOC_Os05g18294;LOC_Os11g25780
LOC_Os09g26620	2	osa-miRf10614-akr osa-miRf12029-akr				osa-miRf10321-akr	2	LOC_Os03g22050;LOC_Os09g13440
LOC_Os09g26960	2	osa-miRf10185-akr osa-miRf11742-akr				osa-miRf10342-akr	2	LOC_Os09g19790;LOC_Os11g25780
LOC_Os09g27950	2	osa-miR397b osa-miRf10140-akr				osa-miRf10347-akr	2	LOC_Os05g18294;LOC_Os08g13430
LOC_Os09g28210	2	osa-miRf10272-akr osa-miRf10273-akr				osa-miRf10350-akr	2	LOC_Os01g74370;LOC_Os12g40180
LOC_Os09g29210	2	osa-miRf10406-akr osa-miRf11059-akr				osa-miRf10366-akr	2	LOC_Os05g18294;LOC_Os08g13430
LOC_Os09g31430	2	osa-miR395a osa-miR395t				osa-miRf10371-akr	2	LOC_Os05g18294;LOC_Os08g13430
LOC_Os09g32680	2	osa-miRf11242-akr osa-miRf11468-akr				osa-miRf10375-akr	2	LOC_Os10g35470;LOC_Os11g41034
LOC_Os09g33490	2	osa-miRf10495-akr osa-miRf12029-akr				osa-miRf10381-akr	2	LOC_Os03g15850;LOC_Os03g22050
LOC_Os09g33680	2	osa-miRf10799-akr osa-miRf11294-akr				osa-miRf10386-akr	2	LOC_Os03g04660;LOC_Os12g39830
LOC_Os09g37180	2	osa-miRf11514-akr osa-miRf12001-akr				osa-miRf10390-akr	2	LOC_Os05g18294;LOC_Os08g13430
LOC_Os09g37650	2	osa-miRf10226-akr osa-miRf11299-akr				osa-miRf10394-akr	2	LOC_Os10g40740;LOC_Os12g12470
LOC_Os09g39760	2	osa-miRf11355-akr osa-miRf12099-akr				osa-miRf10397-akr	2	LOC_Os08g13430;LOC_Os11g25780
LOC_Os10g01640	2	osa-miRf10298-akr osa-miRf10454-akr				osa-miRf10398-akr	2	LOC_Os08g13430;LOC_Os11g25780
LOC_Os10g02480	2	osa-miRf10603-akr osa-miRf11045-akr				osa-miRf10405-akr	2	LOC_Os05g18294;LOC_Os11g25780
LOC_Os10g02920	2	osa-miR444b.2 osa-miR444c.2				osa-miRf10408-akr	2	LOC_Os05g18294;LOC_Os06g08720
LOC_Os10g05750	2	osa-miR444a.1 osa-miR444d.1				osa-miRf10411-akr	2	LOC_Os01g65780;LOC_Os08g13430
LOC_Os10g17454	2	osa-miR414 osa-miRf12002-akr				osa-miRf10412-akr	2	LOC_Os06g03860;LOC_Os08g08960
LOC_Os10g21360	2	osa-miRf10461-akr osa-miRf11203-akr				osa-miRf10415-akr	2	LOC_Os05g18294;LOC_Os11g25780
LOC_Os10g28600	2	osa-miRf11040-akr osa-miRf11895-akr				osa-miRf10422-akr	2	LOC_Os06g23274;LOC_Os07g41060
LOC_Os10g30150	2	osa-miRf11390-akr osa-miRf11732-akr				osa-miRf10426-akr	2	LOC_Os08g13430;LOC_Os11g25780
LOC_Os10g31040	2	osa-miRf10947-akr osa-miRf11167-akr				osa-miRf10431-akr	2	LOC_Os06g43210;LOC_Os06g48030
LOC_Os10g31680	2	osa-miRf10261-akr osa-miRf10329-akr				osa-miRf10434-akr	2	LOC_Os05g18294;LOC_Os08g13430
LOC_Os10g33370	2	osa-miRf10453-akr osa-miRf10458-akr				osa-miRf10435-akr	2	LOC_Os05g18294;LOC_Os08g13430
LOC_Os10g33540	2	osa-miRf10273-akr osa-miRf10319-akr				osa-miRf10444-akr	2	LOC_Os10g35470;LOC_Os11g41034
LOC_Os10g38580	2	osa-miR1848 osa-miRf10164-akr				osa-miRf10456-akr	2	LOC_Os01g55040;LOC_Os06g06080
LOC_Os10g38930	2	osa-miR1858a osa-miR1858b				osa-miRf10465-akr	2	LOC_Os01g19240;LOC_Os07g42370
LOC_Os10g39140	2	osa-miRf10223-akr osa-miRf10277-akr				osa-miRf10470-akr	2	LOC_Os05g18294;LOC_Os08g13430
LOC_Os10g39920	2	osa-miRf10863-akr osa-miRf11047-akr				osa-miRf10473-akr	2	LOC_Os01g53920;LOC_Os04g32540
LOC_Os10g40324	2	osa-miRf10220-akr osa-miRf10483-akr				osa-miRf10475-akr	2	LOC_Os01g02000;LOC_Os04g56060
LOC_Os10g41040	2	osa-miR408 osa-miRf10267-akr				osa-miRf10476-akr	2	LOC_Os02g08210;LOC_Os05g02250
LOC_Os10g41250	2	osa-miR1858a osa-miR1858b				osa-miRf10478-akr	2	LOC_Os03g04140;LOC_Os03g21850
LOC_Os10g42410	2	osa-miR1858a osa-miR1858b				osa-miRf10486-akr	2	LOC_Os05g18294;LOC_Os08g13430
LOC_Os11g03650	2	osa-miRf11169-akr osa-miRf12082-akr				osa-miRf10488-akr	2	LOC_Os05g18294;LOC_Os08g13430
LOC_Os11g04030	2	osa-miR1438 osa-miRf10202-akr				osa-miRf10489-akr	2	LOC_Os05g18294;LOC_Os08g13430
LOC_Os11g05290	2	osa-miRf10273-akr osa-miRf10539-akr				osa-miRf10490-akr	2	LOC_Os02g08410;LOC_Os03g29970
LOC_Os11g08090	2	osa-miRf10782-akr osa-miRf10924-akr				osa-miRf10538-akr	2	LOC_Os08g09250;LOC_Os08g13430
LOC_Os11g09020	2	osa-miRf11390-akr osa-miRf12002-akr				osa-miRf10539-akr	2	LOC_Os01g52170;LOC_Os11g05290
LOC_Os11g13880	2	osa-miRf11036-akr osa-miRf11361-akr				osa-miRf10546-akr	2	LOC_Os05g18294;LOC_Os11g25780
LOC_Os11g14390	2	osa-miR1436 osa-miR1439				osa-miRf10552-akr	2	LOC_Os05g18294;LOC_Os08g13430
LOC_Os11g19700	2	osa-miRf11188-akr osa-miRf12038-akr				osa-miRf10560-akr	2	LOC_Os05g18294;LOC_Os08g13430
LOC_Os11g20179	2	osa-miR1858a osa-miR1858b				osa-miRf10561-akr	2	LOC_Os05g18294;LOC_Os08g13430
LOC_Os11g29870	2	osa-miRf10273-akr osa-miRf10576-akr				osa-miRf10568-akr	2	LOC_Os07g42730;LOC_Os07g49480
LOC_Os11g32650	2	osa-miRf10060-akr osa-miRf11855-akr				osa-miRf10569-akr	2	LOC_Os06g06080;LOC_Os10g40740
LOC_Os11g34450	2	osa-miRf10819-akr osa-miRf10863-akr				osa-miRf10575-akr	2	LOC_Os06g21890;LOC_Os06g36560
LOC_Os11g37050	2	osa-miR414 osa-miRf11687-akr				osa-miRf10577-akr	2	LOC_Os03g22690;LOC_Os04g27950
LOC_Os11g37950	2	osa-miR1884a osa-miR1884b				osa-miRf10595-akr	2	LOC_Os04g05580;LOC_Os04g56130
LOC_Os11g39640	2	osa-miRf10773-akr osa-miRf12029-akr				osa-miRf10598-akr	2	LOC_Os05g18294;LOC_Os11g25780
LOC_Os11g47760	2	osa-miRf11158-akr osa-miRf11530-akr				osa-miRf10601-akr	2	LOC_Os05g18294;LOC_Os11g25780
LOC_Os11g48060	2	osa-miR397a osa-miR397b				osa-miRf10606-akr	2	LOC_Os08g13430;LOC_Os11g25780
LOC_Os11g48070	2	osa-miRf10406-akr osa-miRf11132-akr				osa-miRf10610-akr	2	LOC_Os05g18294;LOC_Os08g13430
LOC_Os12g01030	2	osa-miR1861h osa-miR1861j				osa-miRf10612-akr	2	LOC_Os05g18294;LOC_Os08g13430
LOC_Os12g03370	2	osa-miRf10060-akr osa-miRf10734-akr				osa-miRf10613-akr	2	LOC_Os05g18294;LOC_Os08g13430
LOC_Os12g03899	2	osa-miRf10791-akr osa-miRf11619-akr				osa-miRf10614-akr	2	LOC_Os04g53760;LOC_Os09g26620
LOC_Os12g04360	2	osa-miRf10185-akr osa-miRf11073-akr				osa-miRf10619-akr	2	LOC_Os01g32670;LOC_Os05g41900
LOC_Os12g06200	2	osa-miR1439 osa-miRf11090-akr				osa-miRf10637-akr	2	LOC_Os03g48660;LOC_Os04g33490
LOC_Os12g06464	2	osa-miRf10642-akr osa-miRf11877-akr				osa-miRf10641-akr	2	LOC_Os01g18050;LOC_Os04g08270
LOC_Os12g06850	2	osa-miR2102-5p osa-miRf10752-akr				osa-miRf10644-akr	2	LOC_Os01g13690;LOC_Os01g42280
LOC_Os12g06910	2	osa-miRf11812-akr osa-miRf11981-akr				osa-miRf10647-akr	2	LOC_Os08g09250;LOC_Os08g13430
LOC_Os12g07640	2	osa-miR1858a osa-miR1858b				osa-miRf10649-akr	2	LOC_Os01g32364;LOC_Os11g47970
LOC_Os12g12880	2	osa-miRf10140-akr osa-miRf10277-akr				osa-miRf10661-akr	2	LOC_Os05g18294;LOC_Os08g13430
LOC_Os12g13940	2	osa-miR1320 osa-miR1866-5p				osa-miRf10665-akr	2	LOC_Os08g13430;LOC_Os11g25780
LOC_Os12g18150	2	osa-miRf10464-akr osa-miRf11502-akr				osa-miRf10666-akr	2	LOC_Os05g18294;LOC_Os11g25780
LOC_Os12g37780	2	osa-miR172a osa-miR172d				osa-miRf10684-akr	2	LOC_Os06g13190;LOC_Os10g38540
LOC_Os12g38250	2	osa-miRf10273-akr osa-miRf10632-akr				osa-miRf10693-akr	2	LOC_Os05g18294;LOC_Os08g13430
LOC_Os12g39400	2	osa-miRf10223-akr osa-miRf12002-akr				osa-miRf10699-akr	2	LOC_Os01g65130;LOC_Os03g21530
LOC_Os12g39620	2	osa-miRf10329-akr osa-miRf12002-akr				osa-miRf10700-akr	2	LOC_Os05g18294;LOC_Os08g13430
LOC_Os12g39830	2	osa-miRf10386-akr osa-miRf11221-akr				osa-miRf10703-akr	2	LOC_Os05g18294;LOC_Os11g25780
LOC_Os12g40180	2	osa-miRf10350-akr osa-miRf10578-akr				osa-miRf10704-akr	2	LOC_Os08g13430;LOC_Os11g25780
LOC_Os12g41650	2	osa-miRf10272-akr osa-miRf10273-akr				osa-miRf10707-akr	2	LOC_Os08g13430;LOC_Os11g25780
LOC_Os12g42220	2	osa-miR1320 osa-miR1866-3p				osa-miRf10709-akr	2	LOC_Os01g69010;LOC_Os05g43390
LOC_Os12g43580	2	osa-miRf10906-akr osa-miRf11878-akr				osa-miRf10713-akr	2	LOC_Os03g06760;LOC_Os12g04924
LOC_Os01g01030	1	osa-miR1860-5p				osa-miRf10716-akr	2	LOC_Os05g18294;LOC_Os08g13430
LOC_Os01g01350	1	osa-miR414				osa-miRf10730-akr	2	LOC_Os05g18294;LOC_Os08g13430
LOC_Os01g01960	1	osa-miR414				osa-miRf10737-akr	2	LOC_Os06g21890;LOC_Os06g36560
LOC_Os01g02150	1	osa-miRf10947-akr				osa-miRf10738-akr	2	LOC_Os06g21890;LOC_Os07g47590
LOC_Os01g02870	1	osa-miRf10477-akr				osa-miRf10739-akr	2	LOC_Os04g52606;LOC_Os05g05650
LOC_Os01g03060	1	osa-miR419				osa-miRf10740-akr	2	LOC_Os05g18294;LOC_Os08g13430
LOC_Os01g03144	1	osa-miRf10226-akr				osa-miRf10742-akr	2	LOC_Os02g02400;LOC_Os05g25430
LOC_Os01g03730	1	osa-miRf11856-akr				osa-miRf10764-akr	2	LOC_Os05g18294;LOC_Os08g13430
LOC_Os01g04080	1	osa-miRf10446-akr				osa-miRf10765-akr	2	LOC_Os02g46720;LOC_Os03g49940
LOC_Os01g04100	1	osa-miRf11481-akr				osa-miRf10768-akr	2	LOC_Os08g04340;LOC_Os08g33540
LOC_Os01g04280	1	osa-miR1427				osa-miRf10782-akr	2	LOC_Os06g21890;LOC_Os11g08090
LOC_Os01g04350	1	osa-miRf11073-akr				osa-miRf10790-akr	2	LOC_Os08g13430;LOC_Os11g25780
LOC_Os01g07530	1	osa-miRf10273-akr				osa-miRf10794-akr	2	LOC_Os01g53920;LOC_Os04g49060
LOC_Os01g07630	1	osa-miRf10213-akr				osa-miRf10813-akr	2	LOC_Os01g48930;LOC_Os10g39670
LOC_Os01g07950	1	osa-miRf10406-akr				osa-miRf10815-akr	2	LOC_Os05g31160;LOC_Os07g49480
LOC_Os01g07970	1	osa-miRf11595-akr				osa-miRf10828-akr	2	LOC_Os02g37190;LOC_Os10g25060
LOC_Os01g08440	1	osa-miRf10273-akr				osa-miRf10833-akr	2	LOC_Os01g68320;LOC_Os06g23274
LOC_Os01g08710	1	osa-miRf10947-akr				osa-miRf10834-akr	2	LOC_Os04g37990;LOC_Os04g53740
LOC_Os01g08760	1	osa-miRf11026-akr				osa-miRf10835-akr	2	LOC_Os01g53920;LOC_Os04g49060
LOC_Os01g08780	1	osa-miRf11341-akr				osa-miRf10840-akr	2	LOC_Os05g45740;LOC_Os07g10350
LOC_Os01g09790	1	osa-miRf12029-akr				osa-miRf10852-akr	2	LOC_Os05g18294;LOC_Os08g13430
LOC_Os01g10870	1	osa-miRf10481-akr				osa-miRf10857-akr	2	LOC_Os05g18294;LOC_Os11g25780
LOC_Os01g10890	1	osa-miRf10420-akr				osa-miRf10861-akr	2	LOC_Os07g43390;LOC_Os11g25780
LOC_Os01g10930	1	osa-miRf10734-akr				osa-miRf10868-akr	2	LOC_Os08g13430;LOC_Os11g25780
LOC_Os01g11340	1	osa-miRf10277-akr				osa-miRf10869-akr	2	LOC_Os05g18294;LOC_Os08g13430
LOC_Os01g11570	1	osa-miRf12002-akr				osa-miRf10871-akr	2	LOC_Os06g13190;LOC_Os08g21900
LOC_Os01g11710	1	osa-miRf10820-akr				osa-miRf10872-akr	2	LOC_Os06g13190;LOC_Os10g38540
LOC_Os01g12840	1	osa-miRf10153-akr				osa-miRf10873-akr	2	LOC_Os06g13190;LOC_Os10g38540
LOC_Os01g13150	1	osa-miR446				osa-miRf10877-akr	2	LOC_Os05g18294;LOC_Os11g25780
LOC_Os01g13280	1	osa-miRf10957-akr				osa-miRf10900-akr	2	LOC_Os06g21890;LOC_Os06g36560
LOC_Os01g13460	1	osa-miRf12002-akr				osa-miRf10907-akr	2	LOC_Os05g18294;LOC_Os08g13430
LOC_Os01g13610	1	osa-miRf11842-akr				osa-miRf10908-akr	2	LOC_Os05g18294;LOC_Os08g13430
LOC_Os01g14950	1	osa-miRf10070-akr				osa-miRf10913-akr	2	LOC_Os08g13430;LOC_Os11g25780
LOC_Os01g15000	1	osa-miRf11024-akr				osa-miRf10917-akr	2	LOC_Os08g13430;LOC_Os11g25780
LOC_Os01g15270	1	osa-miRf11516-akr				osa-miRf10920-akr	2	LOC_Os08g09250;LOC_Os08g13430
LOC_Os01g15320	1	osa-miRf11880-akr				osa-miRf10928-akr	2	LOC_Os02g41840;LOC_Os08g29150
LOC_Os01g15800	1	osa-miRf12029-akr				osa-miRf10940-akr	2	LOC_Os07g25700;LOC_Os10g35370
LOC_Os01g16330	1	osa-miR808				osa-miRf10948-akr	2	LOC_Os05g18294;LOC_Os08g13430
LOC_Os01g16670	1	osa-miR414				osa-miRf10949-akr	2	LOC_Os05g18294;LOC_Os08g13430
LOC_Os01g17320	1	osa-miRf10557-akr				osa-miRf10950-akr	2	LOC_Os05g18294;LOC_Os08g13430
LOC_Os01g18080	1	osa-miRf10446-akr				osa-miRf10958-akr	2	LOC_Os05g18294;LOC_Os08g13430
LOC_Os01g18370	1	osa-miR1848				osa-miRf10959-akr	2	LOC_Os08g13430;LOC_Os11g25780
LOC_Os01g18744	1	osa-miRf11341-akr				osa-miRf10960-akr	2	LOC_Os08g13430;LOC_Os11g25780
LOC_Os01g19240	1	osa-miRf10465-akr				osa-miRf10962-akr	2	LOC_Os05g18294;LOC_Os11g25780
LOC_Os01g22660	1	osa-miRf10947-akr				osa-miRf10963-akr	2	LOC_Os05g18294;LOC_Os11g25780
LOC_Os01g24470	1	osa-miRf12053-akr				osa-miRf10966-akr	2	LOC_Os05g18294;LOC_Os08g13430
LOC_Os01g25720	1	osa-miRf11355-akr				osa-miRf10976-akr	2	LOC_Os05g18294;LOC_Os08g13430
LOC_Os01g26120	1	osa-miRf10123-akr				osa-miRf10978-akr	2	LOC_Os04g33860;LOC_Os05g48390
LOC_Os01g27720	1	osa-miRf10361-akr				osa-miRf10991-akr	2	LOC_Os01g68790;LOC_Os08g13430
LOC_Os01g27990	1	osa-miRf10361-akr				osa-miRf10994-akr	2	LOC_Os01g15039;LOC_Os04g45750
LOC_Os01g31610	1	osa-miRf11495-akr				osa-miRf10995-akr	2	LOC_Os01g73310;LOC_Os04g38570
LOC_Os01g31760	1	osa-miRf10714-akr				osa-miRf10996-akr	2	LOC_Os05g18294;LOC_Os08g13430
LOC_Os01g32670	1	osa-miRf10619-akr				osa-miRf10998-akr	2	LOC_Os05g18294;LOC_Os08g13430
LOC_Os01g34790	1	osa-miRf10273-akr				osa-miRf11008-akr	2	LOC_Os05g18294;LOC_Os08g13430
LOC_Os01g36600	1	osa-miRf11242-akr				osa-miRf11023-akr	2	LOC_Os08g13430;LOC_Os11g25780
LOC_Os01g36790	1	osa-miR435				osa-miRf11032-akr	2	LOC_Os07g06980;LOC_Os11g13750
LOC_Os01g37690	1	osa-miRf11158-akr				osa-miRf11033-akr	2	LOC_Os08g12780;LOC_Os12g03720
LOC_Os01g38980	1	osa-miRf10105-akr				osa-miRf11034-akr	2	LOC_Os05g18294;LOC_Os11g25780
LOC_Os01g39040	1	osa-miRf11073-akr				osa-miRf11052-akr	2	LOC_Os03g22610;LOC_Os04g57020
LOC_Os01g39830	1	osa-miRf10097-akr				osa-miRf11055-akr	2	LOC_Os05g18294;LOC_Os08g13430
LOC_Os01g39860	1	osa-miRf10273-akr				osa-miRf11056-akr	2	LOC_Os08g13430;LOC_Os11g25780
LOC_Os01g40094	1	osa-miRf11390-akr				osa-miRf11058-akr	2	LOC_Os05g18294;LOC_Os08g13430
LOC_Os01g40610	1	osa-miR414				osa-miRf11064-akr	2	LOC_Os04g11400;LOC_Os12g25180
LOC_Os01g40980	1	osa-miRf10298-akr				osa-miRf11065-akr	2	LOC_Os03g54160;LOC_Os06g04020
LOC_Os01g41600	1	osa-miRf10223-akr				osa-miRf11083-akr	2	LOC_Os09g32010;LOC_Os11g37920
LOC_Os01g41870	1	osa-miRf10863-akr				osa-miRf11088-akr	2	LOC_Os05g18294;LOC_Os08g13430
LOC_Os01g42280	1	osa-miRf10644-akr				osa-miRf11104-akr	2	LOC_Os08g13430;LOC_Os11g25780
LOC_Os01g42330	1	osa-miR444d.3				osa-miRf11113-akr	2	LOC_Os05g18294;LOC_Os11g25780
LOC_Os01g42510	1	osa-miRf10692-akr				osa-miRf11114-akr	2	LOC_Os03g10620;LOC_Os05g41070
LOC_Os01g42840	1	osa-miRf11025-akr				osa-miRf11123-akr	2	LOC_Os02g39970;LOC_Os03g10750
LOC_Os01g42850	1	osa-miRf10984-akr				osa-miRf11127-akr	2	LOC_Os05g18294;LOC_Os08g13430
LOC_Os01g43080	1	osa-miRf10153-akr				osa-miRf11139-akr	2	LOC_Os08g13430;LOC_Os11g25780
LOC_Os01g43380	1	osa-miR530-5p				osa-miRf11144-akr	2	LOC_Os03g22610;LOC_Os07g43020
LOC_Os01g43851	1	osa-miRf10543-akr				osa-miRf11145-akr	2	LOC_Os08g20570;LOC_Os11g08330
LOC_Os01g43910	1	osa-miRf10519-akr				osa-miRf11146-akr	2	LOC_Os05g18294;LOC_Os08g13430
LOC_Os01g43950	1	osa-miRf10153-akr				osa-miRf11165-akr	2	LOC_Os05g18294;LOC_Os08g13430
LOC_Os01g44110	1	osa-miR1849				osa-miRf11166-akr	2	LOC_Os05g18294;LOC_Os08g13430
LOC_Os01g44120	1	osa-miRf10819-akr				osa-miRf11180-akr	2	LOC_Os01g61720;LOC_Os06g21890
LOC_Os01g44980	1	osa-miR2103				osa-miRf11188-akr	2	LOC_Os02g38290;LOC_Os11g19700
LOC_Os01g45274	1	osa-miRf10319-akr				osa-miRf11193-akr	2	LOC_Os05g18294;LOC_Os09g37012
LOC_Os01g46470	1	osa-miR414				osa-miRf11198-akr	2	LOC_Os05g18294;LOC_Os08g13430
LOC_Os01g46760	1	osa-miRf11518-akr				osa-miRf11217-akr	2	LOC_Os01g24050;LOC_Os04g42670
LOC_Os01g46970	1	osa-miRf11647-akr				osa-miRf11220-akr	2	LOC_Os05g18294;LOC_Os08g13430
LOC_Os01g47070	1	osa-miRf10449-akr				osa-miRf11222-akr	2	LOC_Os05g18294;LOC_Os08g13430
LOC_Os01g47560	1	osa-miRf11095-akr				osa-miRf11223-akr	2	LOC_Os05g15330;LOC_Os06g14324
LOC_Os01g47760	1	osa-miR1848				osa-miRf11232-akr	2	LOC_Os08g13430;LOC_Os11g25780
LOC_Os01g47820	1	osa-miRf10876-akr				osa-miRf11235-akr	2	LOC_Os08g13430;LOC_Os11g25780
LOC_Os01g48300	1	osa-miRf11523-akr				osa-miRf11236-akr	2	LOC_Os01g65780;LOC_Os08g13430
LOC_Os01g48910	1	osa-miRf10228-akr				osa-miRf11238-akr	2	LOC_Os01g71330;LOC_Os02g15860
LOC_Os01g48930	1	osa-miRf10813-akr				osa-miRf11243-akr	2	LOC_Os04g52606;LOC_Os07g43020
LOC_Os01g48960	1	osa-miRf11775-akr				osa-miRf11245-akr	2	LOC_Os06g08080;LOC_Os08g13430
LOC_Os01g49830	1	osa-miRf10153-akr				osa-miRf11248-akr	2	LOC_Os04g24294;LOC_Os04g42784
LOC_Os01g50080	1	osa-miRf11859-akr				osa-miRf11249-akr	2	LOC_Os06g08080;LOC_Os08g13430
LOC_Os01g50700	1	osa-miRf12007-akr				osa-miRf11256-akr	2	LOC_Os08g13430;LOC_Os11g25780
LOC_Os01g50930	1	osa-miRf11774-akr				osa-miRf11257-akr	2	LOC_Os08g13430;LOC_Os11g25780
LOC_Os01g51920	1	osa-miRf11024-akr				osa-miRf11259-akr	2	LOC_Os04g58190;LOC_Os09g12750
LOC_Os01g52170	1	osa-miRf10539-akr				osa-miRf11260-akr	2	LOC_Os03g27990;LOC_Os08g35600
LOC_Os01g52660	1	osa-miRf11742-akr				osa-miRf11271-akr	2	LOC_Os05g18294;LOC_Os11g25780
LOC_Os01g53000	1	osa-miRf10033-akr				osa-miRf11279-akr	2	LOC_Os05g18294;LOC_Os08g13430
LOC_Os01g53040	1	osa-miRf10642-akr				osa-miRf11286-akr	2	LOC_Os07g32170;LOC_Os07g42714
LOC_Os01g53880	1	osa-miR408				osa-miRf11294-akr	2	LOC_Os08g13430;LOC_Os09g33680
LOC_Os01g53910	1	osa-miRf11407-akr				osa-miRf11295-akr	2	LOC_Os10g39110;LOC_Os11g25160
LOC_Os01g54080	1	osa-miRf10140-akr				osa-miRf11296-akr	2	LOC_Os05g18294;LOC_Os08g13430
LOC_Os01g54450	1	osa-miRf11662-akr				osa-miRf11299-akr	2	LOC_Os03g41460;LOC_Os09g37650
LOC_Os01g54520	1	osa-miRf10970-akr				osa-miRf11306-akr	2	LOC_Os05g18294;LOC_Os11g25780
LOC_Os01g55040	1	osa-miRf10456-akr				osa-miRf11309-akr	2	LOC_Os08g13430;LOC_Os11g25780
LOC_Os01g56000	1	osa-miRf10387-akr				osa-miRf11310-akr	2	LOC_Os03g12900;LOC_Os09g23350
LOC_Os01g56080	1	osa-miRf12002-akr				osa-miRf11315-akr	2	LOC_Os06g13190;LOC_Os10g38540
LOC_Os01g56550	1	osa-miRf12002-akr				osa-miRf11318-akr	2	LOC_Os05g18294;LOC_Os11g25780
LOC_Os01g57730	1	osa-miRf12017-akr				osa-miRf11319-akr	2	LOC_Os02g08410;LOC_Os03g29970
LOC_Os01g57940	1	osa-miRf10604-akr				osa-miRf11324-akr	2	LOC_Os05g18294;LOC_Os08g13430
LOC_Os01g59500	1	osa-miRf11242-akr				osa-miRf11334-akr	2	LOC_Os07g32170;LOC_Os07g42714
LOC_Os01g59530	1	osa-miRf10652-akr				osa-miRf11340-akr	2	LOC_Os05g18294;LOC_Os08g13430
LOC_Os01g59870	1	osa-miRf11774-akr				osa-miRf11343-akr	2	LOC_Os01g60200;LOC_Os02g44770
LOC_Os01g60000	1	osa-miR171i				osa-miRf11344-akr	2	LOC_Os04g37904;LOC_Os10g21930
LOC_Os01g60200	1	osa-miRf11343-akr				osa-miRf11346-akr	2	LOC_Os01g65130;LOC_Os07g02250
LOC_Os01g60600	1	osa-miRf10450-akr				osa-miRf11349-akr	2	LOC_Os03g19250;LOC_Os11g13890
LOC_Os01g60670	1	osa-miR1848				osa-miRf11350-akr	2	LOC_Os05g18294;LOC_Os08g13430
LOC_Os01g60730	1	osa-miRf11155-akr				osa-miRf11356-akr	2	LOC_Os02g08410;LOC_Os08g13360
LOC_Os01g60910	1	osa-miRf10781-akr				osa-miRf11357-akr	2	LOC_Os02g08410;LOC_Os12g13640
LOC_Os01g61080	1	osa-miRf10947-akr				osa-miRf11360-akr	2	LOC_Os06g13190;LOC_Os10g38540
LOC_Os01g61190	1	osa-miR1425				osa-miRf11366-akr	2	LOC_Os04g11400;LOC_Os12g25180
LOC_Os01g61610	1	osa-miRf10406-akr				osa-miRf11381-akr	2	LOC_Os01g67180;LOC_Os04g38220
LOC_Os01g62070	1	osa-miRf11767-akr				osa-miRf11396-akr	2	LOC_Os05g18294;LOC_Os10g21910
LOC_Os01g62480	1	osa-miR397a				osa-miRf11398-akr	2	LOC_Os05g18294;LOC_Os08g13430
LOC_Os01g62760	1	osa-miRf10947-akr				osa-miRf11404-akr	2	LOC_Os08g13430;LOC_Os11g25780
LOC_Os01g62870	1	osa-miRf10185-akr				osa-miRf11410-akr	2	LOC_Os05g18294;LOC_Os08g13430
LOC_Os01g63060	1	osa-miR1436				osa-miRf11420-akr	2	LOC_Os05g18294;LOC_Os11g25780
LOC_Os01g63190	1	osa-miR1847.1				osa-miRf11422-akr	2	LOC_Os08g13430;LOC_Os11g25780
LOC_Os01g63230	1	osa-miRf11143-akr				osa-miRf11424-akr	2	LOC_Os01g53920;LOC_Os04g49060
LOC_Os01g63690	1	osa-miRf10687-akr				osa-miRf11432-akr	2	LOC_Os08g13430;LOC_Os11g25780
LOC_Os01g63930	1	osa-miRf10205-akr				osa-miRf11433-akr	2	LOC_Os05g18294;LOC_Os11g25780
LOC_Os01g63980	1	osa-miR414				osa-miRf11435-akr	2	LOC_Os08g41400;LOC_Os11g13750
LOC_Os01g64750	1	osa-miRf10063-akr				osa-miRf11444-akr	2	LOC_Os05g15330;LOC_Os06g02600
LOC_Os01g65210	1	osa-miRf12029-akr				osa-miRf11452-akr	2	LOC_Os05g18294;LOC_Os08g13430
LOC_Os01g65520	1	osa-miRf10063-akr				osa-miRf11453-akr	2	LOC_Os05g18294;LOC_Os08g13430
LOC_Os01g65660	1	osa-miRf10756-akr				osa-miRf11458-akr	2	LOC_Os03g18130;LOC_Os09g39310
LOC_Os01g65670	1	osa-miRf11025-akr				osa-miRf11467-akr	2	LOC_Os05g18294;LOC_Os08g13430
LOC_Os01g65860	1	osa-miRf10822-akr				osa-miRf11473-akr	2	LOC_Os09g27210;LOC_Os10g36924
LOC_Os01g66030	1	osa-miRf11013-akr				osa-miRf11474-akr	2	LOC_Os05g18294;LOC_Os08g13430
LOC_Os01g66290	1	osa-miRf10293-akr				osa-miRf11481-akr	2	LOC_Os01g04100;LOC_Os01g62900
LOC_Os01g66350	1	osa-miRf11880-akr				osa-miRf11484-akr	2	LOC_Os05g18294;LOC_Os08g13430
LOC_Os01g67180	1	osa-miRf11381-akr				osa-miRf11485-akr	2	LOC_Os10g35470;LOC_Os11g41034
LOC_Os01g67300	1	osa-miRf11513-akr				osa-miRf11503-akr	2	LOC_Os02g08410;LOC_Os03g29970
LOC_Os01g67360	1	osa-miRf11241-akr				osa-miRf11519-akr	2	LOC_Os06g40818;LOC_Os11g12050
LOC_Os01g67480	1	osa-miRf12029-akr				osa-miRf11521-akr	2	LOC_Os04g40040;LOC_Os08g18974
LOC_Os01g67510	1	osa-miRf11518-akr				osa-miRf11522-akr	2	LOC_Os05g18294;LOC_Os08g13430
LOC_Os01g67950	1	osa-miRf11743-akr				osa-miRf11523-akr	2	LOC_Os01g48300;LOC_Os09g13440
LOC_Os01g68050	1	osa-miRf10792-akr				osa-miRf11524-akr	2	LOC_Os08g13430;LOC_Os11g25780
LOC_Os01g68650	1	osa-miRf12002-akr				osa-miRf11533-akr	2	LOC_Os05g05310;LOC_Os10g39760
LOC_Os01g68700	1	osa-miRf11836-akr				osa-miRf11535-akr	2	LOC_Os05g18294;LOC_Os08g13430
LOC_Os01g68730	1	osa-miRf11513-akr				osa-miRf11536-akr	2	LOC_Os05g18294;LOC_Os08g13430
LOC_Os01g68770	1	osa-miR398a				osa-miRf11541-akr	2	LOC_Os05g18294;LOC_Os08g13430
LOC_Os01g68790	1	osa-miRf10991-akr				osa-miRf11547-akr	2	LOC_Os08g13430;LOC_Os11g25780
LOC_Os01g69010	1	osa-miRf10709-akr				osa-miRf11549-akr	2	LOC_Os05g18294;LOC_Os11g25780
LOC_Os01g69960	1	osa-miRf10773-akr				osa-miRf11553-akr	2	LOC_Os08g07060;LOC_Os12g36110
LOC_Os01g69970	1	osa-miRf11495-akr				osa-miRf11564-akr	2	LOC_Os05g18294;LOC_Os11g25780
LOC_Os01g70010	1	osa-miRf10063-akr				osa-miRf11566-akr	2	LOC_Os07g32170;LOC_Os07g42714
LOC_Os01g70100	1	osa-miR1846e				osa-miRf11567-akr	2	LOC_Os05g18294;LOC_Os11g25780
LOC_Os01g70440	1	osa-miRf11025-akr				osa-miRf11568-akr	2	LOC_Os02g56200;LOC_Os09g13440
LOC_Os01g70490	1	osa-miRf10496-akr				osa-miRf11570-akr	2	LOC_Os03g53910;LOC_Os09g19390
LOC_Os01g70560	1	osa-miRf10844-akr				osa-miRf11576-akr	2	LOC_Os08g13430;LOC_Os11g25780
LOC_Os01g71170	1	osa-miRf10863-akr				osa-miRf11581-akr	2	LOC_Os03g50470;LOC_Os07g06970
LOC_Os01g71230	1	osa-miR414				osa-miRf11589-akr	2	LOC_Os05g18294;LOC_Os08g13430
LOC_Os01g71624	1	osa-miRf10319-akr				osa-miRf11591-akr	2	LOC_Os05g18294;LOC_Os08g13430
LOC_Os01g71680	1	osa-miRf10223-akr				osa-miRf11593-akr	2	LOC_Os05g18294;LOC_Os08g13430
LOC_Os01g71690	1	osa-miR2102-3p				osa-miRf11596-akr	2	LOC_Os08g13430;LOC_Os11g25780
LOC_Os01g72570	1	osa-miRf10063-akr				osa-miRf11597-akr	2	LOC_Os01g62800;LOC_Os06g20200
LOC_Os01g72790	1	osa-miRf10819-akr				osa-miRf11600-akr	2	LOC_Os09g19790;LOC_Os11g25780
LOC_Os01g72990	1	osa-miRf10301-akr				osa-miRf11614-akr	2	LOC_Os03g22050;LOC_Os08g24390
LOC_Os01g73020	1	osa-miRf10605-akr				osa-miRf11615-akr	2	LOC_Os08g17400;LOC_Os09g17600
LOC_Os01g73310	1	osa-miRf10995-akr				osa-miRf11626-akr	2	LOC_Os08g13430;LOC_Os11g25780
LOC_Os01g73590	1	osa-miRf10273-akr				osa-miRf11627-akr	2	LOC_Os06g23870;LOC_Os10g39780
LOC_Os01g73670	1	osa-miR1320				osa-miRf11628-akr	2	LOC_Os07g06890;LOC_Os10g38040
LOC_Os01g74370	1	osa-miRf10350-akr				osa-miRf11630-akr	2	LOC_Os05g18294;LOC_Os08g13430
LOC_Os02g01150	1	osa-miRf11838-akr				osa-miRf11638-akr	2	LOC_Os09g38910;LOC_Os12g42070
LOC_Os02g01210	1	osa-miRf11390-akr				osa-miRf11639-akr	2	LOC_Os02g34690;LOC_Os02g38040
LOC_Os02g02400	1	osa-miRf10742-akr				osa-miRf11640-akr	2	LOC_Os08g13430;LOC_Os11g25780
LOC_Os02g02540	1	osa-miRf10290-akr				osa-miRf11641-akr	2	LOC_Os03g48320;LOC_Os09g32948
LOC_Os02g02560	1	osa-miRf10185-akr				osa-miRf11649-akr	2	LOC_Os06g21890;LOC_Os06g23274
LOC_Os02g04110	1	osa-miRf10425-akr				osa-miRf11654-akr	2	LOC_Os05g18294;LOC_Os08g13430
LOC_Os02g04520	1	osa-miRf12029-akr				osa-miRf11664-akr	2	LOC_Os02g08410;LOC_Os03g29970
LOC_Os02g04780	1	osa-miR1424				osa-miRf11665-akr	2	LOC_Os03g08170;LOC_Os08g06280
LOC_Os02g04840	1	osa-miRf11692-akr				osa-miRf11671-akr	2	LOC_Os05g18294;LOC_Os06g08720
LOC_Os02g05470	1	osa-miRf10273-akr				osa-miRf11678-akr	2	LOC_Os05g39230;LOC_Os05g43880
LOC_Os02g05480	1	osa-miRf12002-akr				osa-miRf11681-akr	2	LOC_Os01g65130;LOC_Os03g21530
LOC_Os02g05620	1	osa-miRf10033-akr				osa-miRf11682-akr	2	LOC_Os01g14100;LOC_Os01g15039
LOC_Os02g06360	1	osa-miRf11047-akr				osa-miRf11688-akr	2	LOC_Os01g43480;LOC_Os06g13190
LOC_Os02g06410	1	osa-miR1848				osa-miRf11695-akr	2	LOC_Os05g15330;LOC_Os06g14324
LOC_Os02g06520	1	osa-miRf10063-akr				osa-miRf11699-akr	2	LOC_Os06g35160;LOC_Os07g06980
LOC_Os02g07060	1	osa-miRf10819-akr				osa-miRf11702-akr	2	LOC_Os06g13190;LOC_Os10g38540
LOC_Os02g07240	1	osa-miRf10477-akr				osa-miRf11708-akr	2	LOC_Os05g18294;LOC_Os11g25780
LOC_Os02g07900	1	osa-miRf11908-akr				osa-miRf11709-akr	2	LOC_Os08g13430;LOC_Os11g25780
LOC_Os02g08150	1	osa-miRf10063-akr				osa-miRf11710-akr	2	LOC_Os08g13430;LOC_Os11g25780
LOC_Os02g08210	1	osa-miRf10476-akr				osa-miRf11712-akr	2	LOC_Os06g35160;LOC_Os07g06980
LOC_Os02g08530	1	osa-miRf10899-akr				osa-miRf11717-akr	2	LOC_Os05g18294;LOC_Os08g13430
LOC_Os02g09150	1	osa-miR414				osa-miRf11720-akr	2	LOC_Os05g18294;LOC_Os08g13430
LOC_Os02g09220	1	osa-miRf10304-akr				osa-miRf11722-akr	2	LOC_Os05g18294;LOC_Os08g13430
LOC_Os02g09240	1	osa-miRf10304-akr				osa-miRf11731-akr	2	LOC_Os01g49820;LOC_Os10g38040
LOC_Os02g09490	1	osa-miRf10273-akr				osa-miRf11732-akr	2	LOC_Os10g30150;LOC_Os12g40900
LOC_Os02g09850	1	osa-miRf10273-akr				osa-miRf11740-akr	2	LOC_Os05g18294;LOC_Os11g25780
LOC_Os02g09940	1	osa-miRf11073-akr				osa-miRf11747-akr	2	LOC_Os05g18294;LOC_Os11g25780
LOC_Os02g10020	1	osa-miRf10458-akr				osa-miRf11751-akr	2	LOC_Os05g18294;LOC_Os08g13430
LOC_Os02g10120	1	osa-miRf11341-akr				osa-miRf11752-akr	2	LOC_Os05g18294;LOC_Os08g13430
LOC_Os02g11740	1	osa-miRf11285-akr				osa-miRf11756-akr	2	LOC_Os05g18294;LOC_Os08g13430
LOC_Os02g12690	1	osa-miRf10844-akr				osa-miRf11760-akr	2	LOC_Os05g18294;LOC_Os08g13430
LOC_Os02g12870	1	osa-miRf10494-akr				osa-miRf11762-akr	2	LOC_Os08g13430;LOC_Os11g25780
LOC_Os02g12939	1	osa-miRf10931-akr				osa-miRf11775-akr	2	LOC_Os01g48960;LOC_Os06g21890
LOC_Os02g13140	1	osa-miRf10458-akr				osa-miRf11777-akr	2	LOC_Os06g21890;LOC_Os06g36560
LOC_Os02g13300	1	osa-miRf11838-akr				osa-miRf11779-akr	2	LOC_Os02g57100;LOC_Os04g24294
LOC_Os02g13800	1	osa-miRf11051-akr				osa-miRf11782-akr	2	LOC_Os08g13430;LOC_Os11g25780
LOC_Os02g13960	1	osa-miR399i				osa-miRf11784-akr	2	LOC_Os05g18294;LOC_Os08g13430
LOC_Os02g14090	1	osa-miRf11240-akr				osa-miRf11787-akr	2	LOC_Os10g35470;LOC_Os11g41034
LOC_Os02g15540	1	osa-miRf10273-akr				osa-miRf11788-akr	2	LOC_Os05g18294;LOC_Os11g25780
LOC_Os02g15750	1	osa-miRf11938-akr				osa-miRf11789-akr	2	LOC_Os05g18294;LOC_Os08g13430
LOC_Os02g15810	1	osa-miRf12002-akr				osa-miRf11793-akr	2	LOC_Os02g22130;LOC_Os03g22634
LOC_Os02g16709	1	osa-miRf11090-akr				osa-miRf11799-akr	2	LOC_Os05g18294;LOC_Os08g13430
LOC_Os02g16830	1	osa-miR1861d				osa-miRf11801-akr	2	LOC_Os08g09250;LOC_Os11g25780
LOC_Os02g16909	1	osa-miRf11160-akr				osa-miRf11806-akr	2	LOC_Os02g30900;LOC_Os10g18400
LOC_Os02g17320	1	osa-miRf11893-akr				osa-miRf11807-akr	2	LOC_Os05g18294;LOC_Os08g13430
LOC_Os02g19650	1	osa-miRf12029-akr				osa-miRf11822-akr	2	LOC_Os08g13430;LOC_Os11g25780
LOC_Os02g20540	1	osa-miRf11647-akr				osa-miRf11823-akr	2	LOC_Os08g13430;LOC_Os11g25780
LOC_Os02g20560	1	osa-miRf10273-akr				osa-miRf11831-akr	2	LOC_Os07g39310;LOC_Os12g12260
LOC_Os02g21750	1	osa-miRf12007-akr				osa-miRf11835-akr	2	LOC_Os04g52606;LOC_Os05g28980
LOC_Os02g22100	1	osa-miR1439				osa-miRf11841-akr	2	LOC_Os03g12010;LOC_Os03g50470
LOC_Os02g22160	1	osa-miRf11073-akr				osa-miRf11842-akr	2	LOC_Os01g13610;LOC_Os10g17650
LOC_Os02g23823	1	osa-miRf10778-akr				osa-miRf11847-akr	2	LOC_Os06g08080;LOC_Os08g13430
LOC_Os02g26650	1	osa-miRf11445-akr				osa-miRf11848-akr	2	LOC_Os02g39140;LOC_Os08g41710
LOC_Os02g26720	1	osa-miR1848				osa-miRf11855-akr	2	LOC_Os01g12690;LOC_Os11g32650
LOC_Os02g27060	1	osa-miRf11221-akr				osa-miRf11860-akr	2	LOC_Os08g13430;LOC_Os11g25780
LOC_Os02g27480	1	osa-miRf10578-akr				osa-miRf11861-akr	2	LOC_Os03g60650;LOC_Os06g05320
LOC_Os02g28340	1	osa-miRf10223-akr				osa-miRf11877-akr	2	LOC_Os11g06720;LOC_Os12g06464
LOC_Os02g28720	1	osa-miR1442				osa-miRf11883-akr	2	LOC_Os05g18294;LOC_Os08g13430
LOC_Os02g30100	1	osa-miRf11283-akr				osa-miRf11895-akr	2	LOC_Os01g01340;LOC_Os10g28600
LOC_Os02g30610	1	osa-miRf10578-akr				osa-miRf11897-akr	2	LOC_Os05g18294;LOC_Os11g25780
LOC_Os02g30800	1	osa-miRf10406-akr				osa-miRf11903-akr	2	LOC_Os08g13430;LOC_Os11g25780
LOC_Os02g31080	1	osa-miRf10863-akr				osa-miRf11915-akr	2	LOC_Os08g13430;LOC_Os11g25780
LOC_Os02g32080	1	osa-miRf10223-akr				osa-miRf11918-akr	2	LOC_Os05g18294;LOC_Os08g13430
LOC_Os02g32469	1	osa-miR1848				osa-miRf11919-akr	2	LOC_Os05g18294;LOC_Os08g13430
LOC_Os02g32540	1	osa-miRf10819-akr				osa-miRf11930-akr	2	LOC_Os05g15330;LOC_Os06g14324
LOC_Os02g32980	1	osa-miRf11622-akr				osa-miRf11943-akr	2	LOC_Os02g36590;LOC_Os06g19390
LOC_Os02g33500	1	osa-miRf10185-akr				osa-miRf11945-akr	2	LOC_Os05g18294;LOC_Os08g13430
LOC_Os02g33780	1	osa-miR414				osa-miRf11948-akr	2	LOC_Os05g18294;LOC_Os08g13430
LOC_Os02g34600	1	osa-miRf10781-akr				osa-miRf11953-akr	2	LOC_Os03g22050;LOC_Os06g12790
LOC_Os02g34690	1	osa-miRf11639-akr				osa-miRf11954-akr	2	LOC_Os03g22050;LOC_Os06g12790
LOC_Os02g34860	1	osa-miRf12002-akr				osa-miRf11967-akr	2	LOC_Os03g29540;LOC_Os05g08420
LOC_Os02g35180	1	osa-miRf12029-akr				osa-miRf11976-akr	2	LOC_Os05g18294;LOC_Os08g13430
LOC_Os02g35770	1	osa-miRf10578-akr				osa-miRf11983-akr	2	LOC_Os05g38040;LOC_Os07g39880
LOC_Os02g35910	1	osa-miR529b				osa-miRf11986-akr	2	LOC_Os05g18294;LOC_Os08g13430
LOC_Os02g36110	1	osa-miR1848				osa-miRf11989-akr	2	LOC_Os05g18294;LOC_Os08g13430
LOC_Os02g36590	1	osa-miRf11943-akr				osa-miRf11993-akr	2	LOC_Os01g43480;LOC_Os06g13190
LOC_Os02g36710	1	osa-miR414				osa-miRf11995-akr	2	LOC_Os03g06330;LOC_Os11g09010
LOC_Os02g36974	1	osa-miRf10576-akr				osa-miRf12004-akr	2	LOC_Os03g21900;LOC_Os05g01240
LOC_Os02g37190	1	osa-miRf10828-akr				osa-miRf12010-akr	2	LOC_Os06g40170;LOC_Os07g46846
LOC_Os02g37700	1	osa-miRf11495-akr				osa-miRf12017-akr	2	LOC_Os01g57730;LOC_Os01g70790
LOC_Os02g38040	1	osa-miRf11639-akr				osa-miRf12018-akr	2	LOC_Os05g18294;LOC_Os08g13430
LOC_Os02g38160	1	osa-miRf10596-akr				osa-miRf12019-akr	2	LOC_Os05g18294;LOC_Os08g13430
LOC_Os02g38386	1	osa-miRf10822-akr				osa-miRf12026-akr	2	LOC_Os05g18294;LOC_Os08g13430
LOC_Os02g39510	1	osa-miR1848				osa-miRf12038-akr	2	LOC_Os04g36050;LOC_Os11g19700
LOC_Os02g39610	1	osa-miRf12021-akr				osa-miRf12047-akr	2	LOC_Os02g22130;LOC_Os09g32010
LOC_Os02g39850	1	osa-miRf10222-akr				osa-miRf12048-akr	2	LOC_Os02g22130;LOC_Os03g22634
LOC_Os02g39930	1	osa-miR1848				osa-miRf12055-akr	2	LOC_Os05g18294;LOC_Os08g13430
LOC_Os02g39970	1	osa-miRf11123-akr				osa-miRf12065-akr	2	LOC_Os08g13430;LOC_Os11g25780
LOC_Os02g40040	1	osa-miR414				osa-miRf12069-akr	2	LOC_Os07g38840;LOC_Os08g13430
LOC_Os02g41580	1	osa-miRf10223-akr				osa-miRf12070-akr	2	LOC_Os05g18294;LOC_Os08g13430
LOC_Os02g41840	1	osa-miRf10928-akr				osa-miRf12077-akr	2	LOC_Os08g13430;LOC_Os11g25780
LOC_Os02g41954	1	osa-miRf12001-akr				osa-miRf12079-akr	2	LOC_Os05g15330;LOC_Os06g14324
LOC_Os02g42590	1	osa-miRf10477-akr				osa-miRf12083-akr	2	LOC_Os05g18294;LOC_Os11g25780
LOC_Os02g43194	1	osa-miRf11632-akr				osa-miRf12085-akr	2	LOC_Os05g18294;LOC_Os08g13430
LOC_Os02g43280	1	osa-miRf11774-akr				osa-miRf12087-akr	2	LOC_Os01g49820;LOC_Os06g23274
LOC_Os02g44040	1	osa-miRf11341-akr				osa-miRf12092-akr	2	LOC_Os01g69830;LOC_Os05g18294
LOC_Os02g44120	1	osa-miRf11199-akr				osa-miRf12094-akr	2	LOC_Os05g18294;LOC_Os08g13430
LOC_Os02g44770	1	osa-miRf11343-akr				osa-miRf12095-akr	2	LOC_Os05g18294;LOC_Os08g13430
LOC_Os02g45170	1	osa-miRf10668-akr				osa-miRf12096-akr	2	LOC_Os05g18294;LOC_Os08g13430
LOC_Os02g45600	1	osa-miRf10819-akr				osa-miRf12099-akr	2	LOC_Os03g50380;LOC_Os09g39760
LOC_Os02g45760	1	osa-miRf11073-akr				osa-miR159c	1	LOC_Os12g42190
LOC_Os02g45930	1	osa-miRf11938-akr				osa-miR159d	1	LOC_Os12g42190
LOC_Os02g47130	1	osa-miR414				osa-miR159e	1	LOC_Os12g42190
LOC_Os02g47310	1	osa-miRf10273-akr				osa-miR159f	1	LOC_Os01g48850
LOC_Os02g47600	1	osa-miRf10585-akr				osa-miR163m	1	LOC_Os02g17500
LOC_Os02g47810	1	osa-miRf10319-akr				osa-miR166a	1	LOC_Os07g39310
LOC_Os02g48150	1	osa-miRf10063-akr				osa-miR166b	1	LOC_Os07g39310
LOC_Os02g48380	1	osa-miR2104				osa-miR166c	1	LOC_Os07g39310
LOC_Os02g48770	1	osa-miRf10406-akr				osa-miR166d	1	LOC_Os07g39310
LOC_Os02g48830	1	osa-miRf10576-akr				osa-miR166f	1	LOC_Os07g39310
LOC_Os02g49440	1	osa-miRf10446-akr				osa-miR166m	1	LOC_Os07g39310
LOC_Os02g49600	1	osa-miRf10097-akr				osa-miR166n	1	LOC_Os07g39310
LOC_Os02g50340	1	osa-miRf11347-akr				osa-miR167a	1	LOC_Os01g63290
LOC_Os02g50350	1	osa-miRf10310-akr				osa-miR167b	1	LOC_Os01g63290
LOC_Os02g50730	1	osa-miRf10819-akr				osa-miR167c	1	LOC_Os01g63290
LOC_Os02g50830	1	osa-miRf11387-akr				osa-miR168a	1	LOC_Os03g48180
LOC_Os02g51070	1	osa-miRf11996-akr				osa-miR168b	1	LOC_Os08g04460
LOC_Os02g51350	1	osa-miRf10519-akr				osa-miR168m	1	LOC_Os03g48180
LOC_Os02g51700	1	osa-miRf10984-akr				osa-miR172a	1	LOC_Os12g37780
LOC_Os02g51860	1	osa-miRf10863-akr				osa-miR172b	1	LOC_Os04g36054
LOC_Os02g52390	1	osa-miR530-3p				osa-miR172d	1	LOC_Os12g37780
LOC_Os02g52670	1	osa-miR2102-5p				osa-miR319a	1	LOC_Os12g42190
LOC_Os02g52700	1	osa-miRf10462-akr				osa-miR319b	1	LOC_Os12g42190
LOC_Os02g52710	1	osa-miRf10462-akr				osa-miR394	1	LOC_Os05g51150
LOC_Os02g53140	1	osa-miRf11221-akr				osa-miR395f	1	LOC_Os12g40480
LOC_Os02g54130	1	osa-miRf10063-akr				osa-miR398b	1	LOC_Os07g46990
LOC_Os02g54240	1	osa-miRf11774-akr				osa-miR399k	1	LOC_Os05g48390
LOC_Os02g54600	1	osa-miRf10863-akr				osa-miR418	1	LOC_Os04g35030
LOC_Os02g54890	1	osa-miRf10605-akr				osa-miR419	1	LOC_Os01g03060
LOC_Os02g55130	1	osa-miRf10446-akr				osa-miR420	1	LOC_Os07g48550
LOC_Os02g55870	1	osa-miRf10495-akr				osa-miR426	1	LOC_Os01g01510
LOC_Os02g56200	1	osa-miRf11568-akr				osa-miR435	1	LOC_Os01g36790
LOC_Os02g56540	1	osa-miR415				osa-miR439a	1	LOC_Os09g38090
LOC_Os02g57250	1	osa-miRf11045-akr				osa-miR439b	1	LOC_Os09g38090
LOC_Os02g57620	1	osa-miRf10273-akr				osa-miR439c	1	LOC_Os09g38090
LOC_Os02g58000	1	osa-miRf11586-akr				osa-miR439d	1	LOC_Os09g38090
LOC_Os02g58160	1	osa-miRf11878-akr				osa-miR439e	1	LOC_Os09g38090
LOC_Os03g01530	1	osa-miRf10223-akr				osa-miR439f	1	LOC_Os09g38090
LOC_Os03g01570	1	osa-miRf11996-akr				osa-miR439g	1	LOC_Os09g38090
LOC_Os03g01700	1	osa-miRf10319-akr				osa-miR439h	1	LOC_Os09g38090
LOC_Os03g01940	1	osa-miRf11912-akr				osa-miR439i	1	LOC_Os09g38090
LOC_Os03g02020	1	osa-miRf10446-akr				osa-miR439j	1	LOC_Os09g38090
LOC_Os03g02050	1	osa-miRf12002-akr				osa-miR445a	1	LOC_Os01g12820
LOC_Os03g02190	1	osa-miRf11518-akr				osa-miR445b	1	LOC_Os01g12820
LOC_Os03g02210	1	osa-miRf10084-akr				osa-miR445c	1	LOC_Os01g12820
LOC_Os03g02860	1	osa-miRf10329-akr				osa-miR445d	1	LOC_Os01g12820
LOC_Os03g03034	1	osa-miRf11440-akr				osa-miR445e	1	LOC_Os01g12820
LOC_Os03g03200	1	osa-miRf10830-akr				osa-miR445f	1	LOC_Os01g12820
LOC_Os03g03550	1	osa-miRf12029-akr				osa-miR445g	1	LOC_Os01g12820
LOC_Os03g03710	1	osa-miR1861n				osa-miR445h	1	LOC_Os01g12820
LOC_Os03g03820	1	osa-miRf10273-akr				osa-miR445i	1	LOC_Os01g12820
LOC_Os03g03990	1	osa-miRf11079-akr				osa-miR530-3p	1	LOC_Os02g52390
LOC_Os03g04140	1	osa-miRf10478-akr				osa-miR806a	1	LOC_Os03g29540
LOC_Os03g05980	1	osa-miRf10458-akr				osa-miR806b	1	LOC_Os03g29540
LOC_Os03g06330	1	osa-miRf11995-akr				osa-miR806c	1	LOC_Os03g29540
LOC_Os03g06350	1	osa-miRf10446-akr				osa-miR806d	1	LOC_Os03g29540
LOC_Os03g06410	1	osa-miRf10255-akr				osa-miR806e	1	LOC_Os03g29540
LOC_Os03g06520	1	osa-miRf10677-akr				osa-miR806f	1	LOC_Os03g29540
LOC_Os03g07300	1	osa-miRf10947-akr				osa-miR806g	1	LOC_Os03g29540
LOC_Os03g07480	1	osa-miRf11390-akr				osa-miR806h	1	LOC_Os03g29540
LOC_Os03g08250	1	osa-miRf12002-akr				osa-miR813	1	LOC_Os03g58580
LOC_Os03g08840	1	osa-miRf11170-akr				osa-miR814a	1	LOC_Os06g48030
LOC_Os03g08860	1	osa-miRf10098-akr				osa-miR814b	1	LOC_Os06g48030
LOC_Os03g10360	1	osa-miRf11221-akr				osa-miR814c	1	LOC_Os06g48030
LOC_Os03g11110	1	osa-miRf10070-akr				osa-miR1317	1	LOC_Os05g36160
LOC_Os03g11370	1	osa-miRf10185-akr				osa-miR1318	1	LOC_Os04g51610
LOC_Os03g11734	1	osa-miRf10604-akr				osa-miR1425	1	LOC_Os01g61190
LOC_Os03g11890	1	osa-miR529a				osa-miR1426	1	LOC_Os05g38710
LOC_Os03g12350	1	osa-miR2103				osa-miR1428b	1	LOC_Os01g04720
LOC_Os03g12450	1	osa-miR1847.1				osa-miR1428c	1	LOC_Os01g04720
LOC_Os03g12530	1	osa-miRf10319-akr				osa-miR1428d	1	LOC_Os01g04720
LOC_Os03g13800	1	osa-miR399h				osa-miR1429-5p	1	LOC_Os06g49430
LOC_Os03g13820	1	osa-miRf11079-akr				osa-miR1433	1	LOC_Os09g15420
LOC_Os03g13870	1	osa-miRf10273-akr				osa-miR1440	1	LOC_Os10g38040
LOC_Os03g15850	1	osa-miRf10381-akr				osa-miR1442	1	LOC_Os02g28720
LOC_Os03g16020	1	osa-miRf11168-akr				osa-miR1846a-5p	1	LOC_Os07g48550
LOC_Os03g16080	1	osa-miRf10863-akr				osa-miR1846b-5p	1	LOC_Os07g48550
LOC_Os03g16170	1	osa-miRf11610-akr				osa-miR1846c-5p	1	LOC_Os07g48550
LOC_Os03g16690	1	osa-miR156o				osa-miR1846e	1	LOC_Os01g70100
LOC_Os03g17140	1	osa-miRf11518-akr				osa-miR1849	1	LOC_Os01g44110
LOC_Os03g17164	1	osa-miRf11939-akr				osa-miR1850.1	1	LOC_Os10g35810
LOC_Os03g17590	1	osa-miRf10222-akr				osa-miR1856	1	LOC_Os09g10274
LOC_Os03g18130	1	osa-miRf11458-akr				osa-miR1857-5p	1	LOC_Os02g30900
LOC_Os03g18370	1	osa-miRf11341-akr				osa-miR1859	1	LOC_Os02g43780
LOC_Os03g19650	1	osa-miR2093-5p				osa-miR1860-5p	1	LOC_Os01g01030
LOC_Os03g21030	1	osa-miRf10223-akr				osa-miR1861e	1	LOC_Os02g48470
LOC_Os03g21720	1	osa-miRf11613-akr				osa-miR1861g	1	LOC_Os08g32060
LOC_Os03g21900	1	osa-miRf12004-akr				osa-miR1861k	1	LOC_Os02g48470
LOC_Os03g22200	1	osa-miRf10831-akr				osa-miR1861m	1	LOC_Os02g48470
LOC_Os03g22210	1	osa-miRf11267-akr				osa-miR1862a	1	LOC_Os07g37560
LOC_Os03g22690	1	osa-miRf10577-akr				osa-miR1862b	1	LOC_Os07g37560
LOC_Os03g22810	1	osa-miRf11571-akr				osa-miR1862c	1	LOC_Os07g37560
LOC_Os03g23980	1	osa-miRf11773-akr				osa-miR1862d	1	LOC_Os03g52280
LOC_Os03g24390	1	osa-miRf11824-akr				osa-miR1868	1	LOC_Os07g46670
LOC_Os03g24590	1	osa-miRf10620-akr				osa-miR1871	1	LOC_Os05g28170
LOC_Os03g24844	1	osa-miRf10330-akr				osa-miR1876	1	LOC_Os02g05890
LOC_Os03g24870	1	osa-miRf10406-akr				osa-miR1880	1	LOC_Os05g34770
LOC_Os03g25490	1	osa-miR1866-5p				osa-miR1882a	1	LOC_Os07g09580
LOC_Os03g25940	1	osa-miRf10773-akr				osa-miR1882b	1	LOC_Os07g09580
LOC_Os03g25960	1	osa-miRf11571-akr				osa-miR1882c	1	LOC_Os07g09580
LOC_Os03g26210	1	osa-miRf11026-akr				osa-miR1882d	1	LOC_Os07g09580
LOC_Os03g26870	1	osa-miR2102-3p				osa-miR1882e	1	LOC_Os07g09580
LOC_Os03g28270	1	osa-miRf11209-akr				osa-miR1882f	1	LOC_Os07g09580
LOC_Os03g29614	1	osa-miRf10290-akr				osa-miR1882g	1	LOC_Os07g09580
LOC_Os03g30250	1	osa-miRf11502-akr				osa-miR1882h	1	LOC_Os07g09580
LOC_Os03g31320	1	osa-miR2100-5p				osa-miR2055	1	LOC_Os01g65080
LOC_Os03g37490	1	osa-miRf11285-akr				osa-miR2093-3p	1	LOC_Os01g33800
LOC_Os03g38050	1	osa-miRf10692-akr				osa-miR2094-5p	1	LOC_Os08g14440
LOC_Os03g38390	1	osa-miRf10462-akr				osa-miR2095-3p	1	LOC_Os03g04920
LOC_Os03g40110	1	osa-miR414				osa-miR2096-3p	1	LOC_Os08g41880
LOC_Os03g42520	1	osa-miRf11025-akr				osa-miR2101-5p	1	LOC_Os04g42090
LOC_Os03g43650	1	osa-miRf11073-akr				osa-miRf10006-akr	1	LOC_Os08g13430
LOC_Os03g43670	1	osa-miRf10281-akr				osa-miRf10008-akr	1	LOC_Os03g58250
LOC_Os03g43720	1	osa-miRf10947-akr				osa-miRf10009-akr	1	LOC_Os03g22120
LOC_Os03g45720	1	osa-miRf11210-akr				osa-miRf10012-akr	1	LOC_Os11g06570
LOC_Os03g46120	1	osa-miRf11440-akr				osa-miRf10013-akr	1	LOC_Os11g26570
LOC_Os03g48030	1	osa-miRf10273-akr				osa-miRf10014-akr	1	LOC_Os08g13430
LOC_Os03g48660	1	osa-miRf10637-akr				osa-miRf10016-akr	1	LOC_Os11g06570
LOC_Os03g49260	1	osa-miRf11209-akr				osa-miRf10017-akr	1	LOC_Os10g36490
LOC_Os03g49440	1	osa-miRf10916-akr				osa-miRf10020-akr	1	LOC_Os05g10630
LOC_Os03g49520	1	osa-miR414				osa-miRf10022-akr	1	LOC_Os09g23530
LOC_Os03g50380	1	osa-miRf12099-akr				osa-miRf10023-akr	1	LOC_Os05g18294
LOC_Os03g50560	1	osa-miRf10323-akr				osa-miRf10027-akr	1	LOC_Os05g28170
LOC_Os03g50960	1	osa-miRf11414-akr				osa-miRf10028-akr	1	LOC_Os05g28170
LOC_Os03g51350	1	osa-miRf10273-akr				osa-miRf10031-akr	1	LOC_Os04g42310
LOC_Os03g51610	1	osa-miRf11656-akr				osa-miRf10037-akr	1	LOC_Os03g52470
LOC_Os03g51900	1	osa-miRf11571-akr				osa-miRf10038-akr	1	LOC_Os08g13430
LOC_Os03g52340	1	osa-miRf12014-akr				osa-miRf10041-akr	1	LOC_Os06g01650
LOC_Os03g52470	1	osa-miRf10037-akr				osa-miRf10045-akr	1	LOC_Os05g43860
LOC_Os03g52680	1	osa-miRf10273-akr				osa-miRf10047-akr	1	LOC_Os08g13430
LOC_Os03g53540	1	osa-miRf11026-akr				osa-miRf10050-akr	1	LOC_Os11g25780
LOC_Os03g53860	1	osa-miRf10496-akr				osa-miRf10054-akr	1	LOC_Os11g25780
LOC_Os03g54084	1	osa-miRf11408-akr				osa-miRf10061-akr	1	LOC_Os11g25160
LOC_Os03g54160	1	osa-miRf11065-akr				osa-miRf10066-akr	1	LOC_Os08g13430
LOC_Os03g55320	1	osa-miRf11013-akr				osa-miRf10075-akr	1	LOC_Os05g43860
LOC_Os03g55350	1	osa-miRf10508-akr				osa-miRf10076-akr	1	LOC_Os11g19800
LOC_Os03g56940	1	osa-miRf10447-akr				osa-miRf10077-akr	1	LOC_Os05g18294
LOC_Os03g57149	1	osa-miRf11073-akr				osa-miRf10081-akr	1	LOC_Os11g06570
LOC_Os03g57880	1	osa-miRf10242-akr				osa-miRf10082-akr	1	LOC_Os06g21890
LOC_Os03g57900	1	osa-miRf10604-akr				osa-miRf10087-akr	1	LOC_Os05g43860
LOC_Os03g57970	1	osa-miRf10273-akr				osa-miRf10091-akr	1	LOC_Os08g13430
LOC_Os03g58090	1	osa-miRf10136-akr				osa-miRf10092-akr	1	LOC_Os05g44030
LOC_Os03g58250	1	osa-miRf10008-akr				osa-miRf10094-akr	1	LOC_Os08g37280
LOC_Os03g58640	1	osa-miRf10554-akr				osa-miRf10096-akr	1	LOC_Os08g04460
LOC_Os03g58650	1	osa-miRf10063-akr				osa-miRf10098-akr	1	LOC_Os03g08860
LOC_Os03g59200	1	osa-miRf10273-akr				osa-miRf10103-akr	1	LOC_Os06g23274
LOC_Os03g59340	1	osa-miR414				osa-miRf10109-akr	1	LOC_Os11g41034
LOC_Os03g59740	1	osa-miRf11632-akr				osa-miRf10110-akr	1	LOC_Os08g13430
LOC_Os03g60120	1	osa-miRf12002-akr				osa-miRf10113-akr	1	LOC_Os11g25780
LOC_Os03g60650	1	osa-miRf11861-akr				osa-miRf10116-akr	1	LOC_Os06g21890
LOC_Os03g61090	1	osa-miRf10273-akr				osa-miRf10119-akr	1	LOC_Os04g56060
LOC_Os03g61120	1	osa-miRf11518-akr				osa-miRf10121-akr	1	LOC_Os01g33800
LOC_Os03g61270	1	osa-miRf11025-akr				osa-miRf10122-akr	1	LOC_Os04g59520
LOC_Os03g61710	1	osa-miRf10804-akr				osa-miRf10128-akr	1	LOC_Os08g31850
LOC_Os03g61720	1	osa-miRf12029-akr				osa-miRf10131-akr	1	LOC_Os08g13430
LOC_Os03g61890	1	osa-miRf11571-akr				osa-miRf10136-akr	1	LOC_Os03g58090
LOC_Os03g62040	1	osa-miRf10916-akr				osa-miRf10152-akr	1	LOC_Os06g14324
LOC_Os03g62610	1	osa-miRf11773-akr				osa-miRf10157-akr	1	LOC_Os08g13430
LOC_Os03g62620	1	osa-miR414				osa-miRf10161-akr	1	LOC_Os03g15780
LOC_Os03g62790	1	osa-miRf11210-akr				osa-miRf10175-akr	1	LOC_Os06g06080
LOC_Os03g63074	1	osa-miR816				osa-miRf10176-akr	1	LOC_Os05g36290
LOC_Os03g63300	1	osa-miRf11210-akr				osa-miRf10178-akr	1	LOC_Os06g19110
LOC_Os03g63550	1	osa-miRf11518-akr				osa-miRf10183-akr	1	LOC_Os11g25780
LOC_Os03g64070	1	osa-miRf10447-akr				osa-miRf10188-akr	1	LOC_Os08g13430
LOC_Os03g64140	1	osa-miRf10589-akr				osa-miRf10190-akr	1	LOC_Os04g57440
LOC_Os03g64150	1	osa-miRf12002-akr				osa-miRf10192-akr	1	LOC_Os11g06570
LOC_Os03g64170	1	osa-miRf10447-akr				osa-miRf10193-akr	1	LOC_Os10g14920
LOC_Os04g01280	1	osa-miRf12053-akr				osa-miRf10195-akr	1	LOC_Os10g14920
LOC_Os04g01540	1	osa-miRf10757-akr				osa-miRf10197-akr	1	LOC_Os08g13430
LOC_Os04g01780	1	osa-miRf10863-akr				osa-miRf10205-akr	1	LOC_Os01g63930
LOC_Os04g05050	1	osa-miRf10620-akr				osa-miRf10207-akr	1	LOC_Os06g39330
LOC_Os04g05580	1	osa-miRf10595-akr				osa-miRf10211-akr	1	LOC_Os02g08410
LOC_Os04g06910	1	osa-miRf10153-akr				osa-miRf10214-akr	1	LOC_Os01g01340
LOC_Os04g09390	1	osa-miRf11513-akr				osa-miRf10220-akr	1	LOC_Os10g40324
LOC_Os04g11040	1	osa-miRf10261-akr				osa-miRf10225-akr	1	LOC_Os08g13430
LOC_Os04g11970	1	osa-miRf10760-akr				osa-miRf10233-akr	1	LOC_Os11g06570
LOC_Os04g12960	1	osa-miRf10605-akr				osa-miRf10236-akr	1	LOC_Os04g35240
LOC_Os04g22360	1	osa-miRf10194-akr				osa-miRf10239-akr	1	LOC_Os06g21890
LOC_Os04g23760	1	osa-miRf10462-akr				osa-miRf10240-akr	1	LOC_Os07g25700
LOC_Os04g27190	1	osa-miRf10429-akr				osa-miRf10242-akr	1	LOC_Os03g57880
LOC_Os04g28620	1	osa-miRf10248-akr				osa-miRf10245-akr	1	LOC_Os03g11660
LOC_Os04g32590	1	osa-miRf10273-akr				osa-miRf10247-akr	1	LOC_Os08g13430
LOC_Os04g32620	1	osa-miRf10273-akr				osa-miRf10252-akr	1	LOC_Os05g18294
LOC_Os04g33310	1	osa-miR1866-5p				osa-miRf10254-akr	1	LOC_Os08g03290
LOC_Os04g34080	1	osa-miRf11025-akr				osa-miRf10258-akr	1	LOC_Os08g13430
LOC_Os04g35030	1	osa-miR418				osa-miRf10259-akr	1	LOC_Os10g14920
LOC_Os04g35060	1	osa-miRf11390-akr				osa-miRf10260-akr	1	LOC_Os06g35160
LOC_Os04g35100	1	osa-miRf10264-akr				osa-miRf10265-akr	1	LOC_Os05g18294
LOC_Os04g35490	1	osa-miRf11613-akr				osa-miRf10268-akr	1	LOC_Os02g14900
LOC_Os04g35760	1	osa-miR414				osa-miRf10271-akr	1	LOC_Os03g17230
LOC_Os04g36000	1	osa-miR414				osa-miRf10275-akr	1	LOC_Os03g22790
LOC_Os04g36054	1	osa-miR172b				osa-miRf10276-akr	1	LOC_Os03g22790
LOC_Os04g37490	1	osa-miRf11390-akr				osa-miRf10280-akr	1	LOC_Os08g38560
LOC_Os04g37904	1	osa-miRf11344-akr				osa-miRf10281-akr	1	LOC_Os03g43670
LOC_Os04g37990	1	osa-miRf10834-akr				osa-miRf10282-akr	1	LOC_Os01g65130
LOC_Os04g38230	1	osa-miRf10984-akr				osa-miRf10283-akr	1	LOC_Os06g21890
LOC_Os04g38620	1	osa-miR414				osa-miRf10284-akr	1	LOC_Os06g21890
LOC_Os04g38630	1	osa-miR415				osa-miRf10286-akr	1	LOC_Os09g32690
LOC_Os04g38680	1	osa-miRf10228-akr				osa-miRf10292-akr	1	LOC_Os01g01340
LOC_Os04g38970	1	osa-miRf12033-akr				osa-miRf10296-akr	1	LOC_Os08g13430
LOC_Os04g39430	1	osa-miRf10495-akr				osa-miRf10297-akr	1	LOC_Os08g33150
LOC_Os04g39440	1	osa-miRf11221-akr				osa-miRf10299-akr	1	LOC_Os11g25780
LOC_Os04g40040	1	osa-miRf11521-akr				osa-miRf10305-akr	1	LOC_Os05g44030
LOC_Os04g40700	1	osa-miRf10070-akr				osa-miRf10306-akr	1	LOC_Os01g33800
LOC_Os04g41020	1	osa-miRf10947-akr				osa-miRf10310-akr	1	LOC_Os02g50350
LOC_Os04g41250	1	osa-miRf12044-akr				osa-miRf10313-akr	1	LOC_Os07g06980
LOC_Os04g41340	1	osa-miRf10863-akr				osa-miRf10320-akr	1	LOC_Os06g14324
LOC_Os04g42000	1	osa-miRf10461-akr				osa-miRf10322-akr	1	LOC_Os03g54050
LOC_Os04g42444	1	osa-miR1435				osa-miRf10325-akr	1	LOC_Os02g49690
LOC_Os04g42580	1	osa-miRf11073-akr				osa-miRf10326-akr	1	LOC_Os02g49690
LOC_Os04g43440	1	osa-miRf10450-akr				osa-miRf10327-akr	1	LOC_Os02g49690
LOC_Os04g44410	1	osa-miR1848				osa-miRf10334-akr	1	LOC_Os03g22050
LOC_Os04g45180	1	osa-miR414				osa-miRf10344-akr	1	LOC_Os05g51150
LOC_Os04g46370	1	osa-miRf10719-akr				osa-miRf10346-akr	1	LOC_Os08g13430
LOC_Os04g46670	1	osa-miRf10961-akr				osa-miRf10352-akr	1	LOC_Os05g49170
LOC_Os04g48310	1	osa-miRf11053-akr				osa-miRf10353-akr	1	LOC_Os01g65780
LOC_Os04g48950	1	osa-miRf10293-akr				osa-miRf10355-akr	1	LOC_Os11g06570
LOC_Os04g49460	1	osa-miRf10773-akr				osa-miRf10357-akr	1	LOC_Os11g13750
LOC_Os04g49550	1	osa-miRf10267-akr				osa-miRf10364-akr	1	LOC_Os02g57100
LOC_Os04g49570	1	osa-miRf10153-akr				osa-miRf10368-akr	1	LOC_Os08g13430
LOC_Os04g50216	1	osa-miRf11378-akr				osa-miRf10370-akr	1	LOC_Os08g13430
LOC_Os04g51410	1	osa-miR1848				osa-miRf10372-akr	1	LOC_Os05g18294
LOC_Os04g51450	1	osa-miRf10153-akr				osa-miRf10373-akr	1	LOC_Os10g14920
LOC_Os04g51830	1	osa-miR529b				osa-miRf10374-akr	1	LOC_Os12g32660
LOC_Os04g52164	1	osa-miRf10033-akr				osa-miRf10377-akr	1	LOC_Os06g06120
LOC_Os04g52450	1	osa-miR414				osa-miRf10382-akr	1	LOC_Os05g29010
LOC_Os04g52900	1	osa-miRf11810-akr				osa-miRf10385-akr	1	LOC_Os03g22120
LOC_Os04g53190	1	osa-miRf11005-akr				osa-miRf10387-akr	1	LOC_Os01g56000
LOC_Os04g53760	1	osa-miRf10614-akr				osa-miRf10392-akr	1	LOC_Os11g25780
LOC_Os04g54080	1	osa-miRf11693-akr				osa-miRf10403-akr	1	LOC_Os08g13430
LOC_Os04g54430	1	osa-miR414				osa-miRf10409-akr	1	LOC_Os08g13430
LOC_Os04g54474	1	osa-miRf10798-akr				osa-miRf10410-akr	1	LOC_Os08g13430
LOC_Os04g54800	1	osa-miRf11613-akr				osa-miRf10413-akr	1	LOC_Os07g27320
LOC_Os04g54810	1	osa-miRf11773-akr				osa-miRf10420-akr	1	LOC_Os01g10890
LOC_Os04g55920	1	osa-miRf10632-akr				osa-miRf10423-akr	1	LOC_Os02g52840
LOC_Os04g56050	1	osa-miRf12002-akr				osa-miRf10425-akr	1	LOC_Os02g04110
LOC_Os04g56130	1	osa-miRf10595-akr				osa-miRf10427-akr	1	LOC_Os08g43500
LOC_Os04g56210	1	osa-miRf11880-akr				osa-miRf10428-akr	1	LOC_Os06g19400
LOC_Os04g56680	1	osa-miRf11872-akr				osa-miRf10433-akr	1	LOC_Os05g18294
LOC_Os04g57020	1	osa-miRf11052-akr				osa-miRf10436-akr	1	LOC_Os05g18294
LOC_Os04g57150	1	osa-miRf12002-akr				osa-miRf10437-akr	1	LOC_Os07g25700
LOC_Os04g57200	1	osa-miRf10319-akr				osa-miRf10438-akr	1	LOC_Os05g18294
LOC_Os04g57430	1	osa-miRf10890-akr				osa-miRf10439-akr	1	LOC_Os05g18294
LOC_Os04g57440	1	osa-miRf10190-akr				osa-miRf10452-akr	1	LOC_Os04g49510
LOC_Os04g57540	1	osa-miRf11611-akr				osa-miRf10453-akr	1	LOC_Os10g33370
LOC_Os04g57560	1	osa-miRf11160-akr				osa-miRf10454-akr	1	LOC_Os10g01640
LOC_Os04g57590	1	osa-miRf11209-akr				osa-miRf10455-akr	1	LOC_Os07g04990
LOC_Os04g57600	1	osa-miR414				osa-miRf10463-akr	1	LOC_Os04g32540
LOC_Os04g57760	1	osa-miRf11095-akr				osa-miRf10464-akr	1	LOC_Os12g18150
LOC_Os04g58190	1	osa-miRf11259-akr				osa-miRf10467-akr	1	LOC_Os07g45000
LOC_Os04g58820	1	osa-miRf11759-akr				osa-miRf10471-akr	1	LOC_Os09g09500
LOC_Os04g59120	1	osa-miRf10863-akr				osa-miRf10474-akr	1	LOC_Os06g40220
LOC_Os04g59520	1	osa-miRf10122-akr				osa-miRf10480-akr	1	LOC_Os08g13430
LOC_Os05g01240	1	osa-miRf12004-akr				osa-miRf10483-akr	1	LOC_Os10g40324
LOC_Os05g01250	1	osa-miRf10574-akr				osa-miRf10484-akr	1	LOC_Os11g25780
LOC_Os05g01310	1	osa-miRf11181-akr				osa-miRf10485-akr	1	LOC_Os09g19400
LOC_Os05g01530	1	osa-miRf11921-akr				osa-miRf10487-akr	1	LOC_Os08g13430
LOC_Os05g01540	1	osa-miRf10770-akr				osa-miRf10494-akr	1	LOC_Os02g12870
LOC_Os05g01940	1	osa-miRf12029-akr				osa-miRf10497-akr	1	LOC_Os01g10580
LOC_Os05g02420	1	osa-miR414				osa-miRf10499-akr	1	LOC_Os11g25780
LOC_Os05g02750	1	osa-miRf11390-akr				osa-miRf10500-akr	1	LOC_Os07g40940
LOC_Os05g03070	1	osa-miRf11073-akr				osa-miRf10501-akr	1	LOC_Os07g40940
LOC_Os05g03130	1	osa-miRf10446-akr				osa-miRf10503-akr	1	LOC_Os11g11240
LOC_Os05g03174	1	osa-miRf11701-akr				osa-miRf10505-akr	1	LOC_Os02g52840
LOC_Os05g03520	1	osa-miR2102-5p				osa-miRf10507-akr	1	LOC_Os11g25780
LOC_Os05g03750	1	osa-miRf10447-akr				osa-miRf10514-akr	1	LOC_Os03g22050
LOC_Os05g04360	1	osa-miRf12044-akr				osa-miRf10516-akr	1	LOC_Os04g43660
LOC_Os05g04500	1	osa-miRf10819-akr				osa-miRf10520-akr	1	LOC_Os05g41200
LOC_Os05g04610	1	osa-miRf10153-akr				osa-miRf10523-akr	1	LOC_Os09g07900
LOC_Os05g04820	1	osa-miRf12103-akr				osa-miRf10525-akr	1	LOC_Os09g04440
LOC_Os05g05280	1	osa-miRf11772-akr				osa-miRf10526-akr	1	LOC_Os08g13430
LOC_Os05g05310	1	osa-miRf11533-akr				osa-miRf10529-akr	1	LOC_Os11g06570
LOC_Os05g05650	1	osa-miRf10739-akr				osa-miRf10530-akr	1	LOC_Os11g06570
LOC_Os05g05830	1	osa-miRf11095-akr				osa-miRf10531-akr	1	LOC_Os11g06570
LOC_Os05g05920	1	osa-miR1848				osa-miRf10533-akr	1	LOC_Os10g39820
LOC_Os05g06320	1	osa-miRf11723-akr				osa-miRf10540-akr	1	LOC_Os08g13430
LOC_Os05g07060	1	osa-miRf12002-akr				osa-miRf10542-akr	1	LOC_Os08g13430
LOC_Os05g07090	1	osa-miR529b				osa-miRf10543-akr	1	LOC_Os01g43851
LOC_Os05g08420	1	osa-miRf11967-akr				osa-miRf10545-akr	1	LOC_Os09g07900
LOC_Os05g09050	1	osa-miRf12022-akr				osa-miRf10548-akr	1	LOC_Os08g13430
LOC_Os05g10630	1	osa-miRf10020-akr				osa-miRf10550-akr	1	LOC_Os08g13430
LOC_Os05g11610	1	osa-miRf10496-akr				osa-miRf10554-akr	1	LOC_Os03g58640
LOC_Os05g11910	1	osa-miRf10273-akr				osa-miRf10555-akr	1	LOC_Os08g13430
LOC_Os05g11990	1	osa-miRf11495-akr				osa-miRf10556-akr	1	LOC_Os08g39694
LOC_Os05g12474	1	osa-miRf10144-akr				osa-miRf10557-akr	1	LOC_Os01g17320
LOC_Os05g12640	1	osa-miR1861d				osa-miRf10558-akr	1	LOC_Os03g16010
LOC_Os05g13580	1	osa-miRf12029-akr				osa-miRf10562-akr	1	LOC_Os04g42090
LOC_Os05g13620	1	osa-miRf10508-akr				osa-miRf10563-akr	1	LOC_Os09g24990
LOC_Os05g14270	1	osa-miR2105				osa-miRf10566-akr	1	LOC_Os04g33490
LOC_Os05g15510	1	osa-miRf10151-akr				osa-miRf10567-akr	1	LOC_Os02g57100
LOC_Os05g24150	1	osa-miR2091-5p				osa-miRf10571-akr	1	LOC_Os01g12820
LOC_Os05g25540	1	osa-miRf12007-akr				osa-miRf10573-akr	1	LOC_Os06g21890
LOC_Os05g25920	1	osa-miRf10947-akr				osa-miRf10579-akr	1	LOC_Os08g13430
LOC_Os05g27790	1	osa-miRf10636-akr				osa-miRf10580-akr	1	LOC_Os05g18294
LOC_Os05g28300	1	osa-miRf10108-akr				osa-miRf10582-akr	1	LOC_Os11g06570
LOC_Os05g28980	1	osa-miRf11835-akr				osa-miRf10583-akr	1	LOC_Os08g13430
LOC_Os05g29010	1	osa-miRf10382-akr				osa-miRf10584-akr	1	LOC_Os05g18294
LOC_Os05g29790	1	osa-miRf10319-akr				osa-miRf10586-akr	1	LOC_Os05g07940
LOC_Os05g31000	1	osa-miR414				osa-miRf10593-akr	1	LOC_Os11g37920
LOC_Os05g31140	1	osa-miRf11341-akr				osa-miRf10596-akr	1	LOC_Os02g38160
LOC_Os05g31160	1	osa-miRf10815-akr				osa-miRf10600-akr	1	LOC_Os11g25780
LOC_Os05g32680	1	osa-miR1861n				osa-miRf10602-akr	1	LOC_Os06g21890
LOC_Os05g33280	1	osa-miRf10273-akr				osa-miRf10607-akr	1	LOC_Os08g04460
LOC_Os05g33630	1	osa-miRf10223-akr				osa-miRf10609-akr	1	LOC_Os08g13430
LOC_Os05g33960	1	osa-miRf10760-akr				osa-miRf10611-akr	1	LOC_Os05g18294
LOC_Os05g34770	1	osa-miR1880				osa-miRf10622-akr	1	LOC_Os07g38110
LOC_Os05g34830	1	osa-miRf12029-akr				osa-miRf10624-akr	1	LOC_Os08g04460
LOC_Os05g35470	1	osa-miRf12044-akr				osa-miRf10626-akr	1	LOC_Os05g18294
LOC_Os05g36290	1	osa-miRf10176-akr				osa-miRf10629-akr	1	LOC_Os10g34790
LOC_Os05g37060	1	osa-miRf11773-akr				osa-miRf10631-akr	1	LOC_Os11g06570
LOC_Os05g37250	1	osa-miRf11025-akr				osa-miRf10636-akr	1	LOC_Os05g27790
LOC_Os05g38150	1	osa-miRf11457-akr				osa-miRf10638-akr	1	LOC_Os05g18294
LOC_Os05g38290	1	osa-miRf10947-akr				osa-miRf10639-akr	1	LOC_Os05g18294
LOC_Os05g38710	1	osa-miR1426				osa-miRf10640-akr	1	LOC_Os10g38040
LOC_Os05g39230	1	osa-miRf11678-akr				osa-miRf10646-akr	1	LOC_Os10g21910
LOC_Os05g39350	1	osa-miRf10060-akr				osa-miRf10650-akr	1	LOC_Os10g22960
LOC_Os05g39680	1	osa-miRf10273-akr				osa-miRf10651-akr	1	LOC_Os01g69904
LOC_Os05g39720	1	osa-miRf10947-akr				osa-miRf10652-akr	1	LOC_Os01g59530
LOC_Os05g39970	1	osa-miRf10330-akr				osa-miRf10653-akr	1	LOC_Os10g38040
LOC_Os05g41220	1	osa-miRf11656-akr				osa-miRf10654-akr	1	LOC_Os01g54930
LOC_Os05g41620	1	osa-miRf10290-akr				osa-miRf10655-akr	1	LOC_Os10g38040
LOC_Os05g41900	1	osa-miRf10619-akr				osa-miRf10657-akr	1	LOC_Os08g13430
LOC_Os05g43040	1	osa-miRf11613-akr				osa-miRf10658-akr	1	LOC_Os08g13430
LOC_Os05g43390	1	osa-miRf10709-akr				osa-miRf10659-akr	1	LOC_Os08g13430
LOC_Os05g44340	1	osa-miRf10449-akr				osa-miRf10660-akr	1	LOC_Os07g49480
LOC_Os05g44570	1	osa-miR396f				osa-miRf10662-akr	1	LOC_Os01g40250
LOC_Os05g45020	1	osa-miR1848				osa-miRf10668-akr	1	LOC_Os02g45170
LOC_Os05g45740	1	osa-miRf10840-akr				osa-miRf10671-akr	1	LOC_Os05g18294
LOC_Os05g46040	1	osa-miRf10063-akr				osa-miRf10672-akr	1	LOC_Os02g57410
LOC_Os05g46350	1	osa-miRf10319-akr				osa-miRf10673-akr	1	LOC_Os05g18294
LOC_Os05g46460	1	osa-miRf11025-akr				osa-miRf10676-akr	1	LOC_Os07g36190
LOC_Os05g46480	1	osa-miRf11013-akr				osa-miRf10677-akr	1	LOC_Os03g06520
LOC_Os05g46760	1	osa-miRf12002-akr				osa-miRf10678-akr	1	LOC_Os07g47490
LOC_Os05g47830	1	osa-miRf10063-akr				osa-miRf10680-akr	1	LOC_Os04g47040
LOC_Os05g47870	1	osa-miRf10273-akr				osa-miRf10686-akr	1	LOC_Os05g48290
LOC_Os05g47960	1	osa-miRf10970-akr				osa-miRf10687-akr	1	LOC_Os01g63690
LOC_Os05g48290	1	osa-miRf10686-akr				osa-miRf10688-akr	1	LOC_Os06g21890
LOC_Os05g48340	1	osa-miRf10508-akr				osa-miRf10691-akr	1	LOC_Os08g13430
LOC_Os05g48640	1	osa-miRf10273-akr				osa-miRf10697-akr	1	LOC_Os03g22050
LOC_Os05g48690	1	osa-miRf10863-akr				osa-miRf10698-akr	1	LOC_Os06g21890
LOC_Os05g48900	1	osa-miRf12029-akr				osa-miRf10706-akr	1	LOC_Os08g13430
LOC_Os05g48930	1	osa-miR1848				osa-miRf10708-akr	1	LOC_Os10g40260
LOC_Os05g49040	1	osa-miRf10153-akr				osa-miRf10711-akr	1	LOC_Os10g38040
LOC_Os05g49170	1	osa-miRf10352-akr				osa-miRf10712-akr	1	LOC_Os09g04440
LOC_Os05g49770	1	osa-miRf11838-akr				osa-miRf10714-akr	1	LOC_Os01g31760
LOC_Os05g49940	1	osa-miR531b				osa-miRf10715-akr	1	LOC_Os06g05320
LOC_Os05g50100	1	osa-miRf10273-akr				osa-miRf10719-akr	1	LOC_Os04g46370
LOC_Os05g50550	1	osa-miRf10481-akr				osa-miRf10721-akr	1	LOC_Os08g13430
LOC_Os05g50600	1	osa-miRf10144-akr				osa-miRf10723-akr	1	LOC_Os07g43020
LOC_Os05g50610	1	osa-miRf11168-akr				osa-miRf10724-akr	1	LOC_Os07g43020
LOC_Os05g51180	1	osa-miRf10223-akr				osa-miRf10725-akr	1	LOC_Os08g13430
LOC_Os05g51650	1	osa-miR2102-5p				osa-miRf10726-akr	1	LOC_Os03g09860
LOC_Os05g51670	1	osa-miRf11514-akr				osa-miRf10727-akr	1	LOC_Os05g18294
LOC_Os05g51830	1	osa-miR414				osa-miRf10729-akr	1	LOC_Os08g13430
LOC_Os06g01490	1	osa-miRf11672-akr				osa-miRf10731-akr	1	LOC_Os08g13430
LOC_Os06g01630	1	osa-miRf11181-akr				osa-miRf10732-akr	1	LOC_Os11g06570
LOC_Os06g01650	1	osa-miRf10041-akr				osa-miRf10733-akr	1	LOC_Os03g22790
LOC_Os06g02600	1	osa-miRf11444-akr				osa-miRf10736-akr	1	LOC_Os06g40170
LOC_Os06g02800	1	osa-miRf10498-akr				osa-miRf10741-akr	1	LOC_Os08g13430
LOC_Os06g03220	1	osa-miRf11347-akr				osa-miRf10747-akr	1	LOC_Os06g35160
LOC_Os06g03860	1	osa-miRf10412-akr				osa-miRf10748-akr	1	LOC_Os04g32540
LOC_Os06g04020	1	osa-miRf11065-akr				osa-miRf10750-akr	1	LOC_Os09g24900
LOC_Os06g04150	1	osa-miRf10060-akr				osa-miRf10757-akr	1	LOC_Os04g01540
LOC_Os06g04490	1	osa-miRf11518-akr				osa-miRf10763-akr	1	LOC_Os03g15780
LOC_Os06g04610	1	osa-miRf11209-akr				osa-miRf10770-akr	1	LOC_Os05g01540
LOC_Os06g04790	1	osa-miRf10273-akr				osa-miRf10774-akr	1	LOC_Os10g40260
LOC_Os06g05090	1	osa-miRf10273-akr				osa-miRf10775-akr	1	LOC_Os08g43120
LOC_Os06g05190	1	osa-miRf10892-akr				osa-miRf10777-akr	1	LOC_Os01g01340
LOC_Os06g05420	1	osa-miRf10806-akr				osa-miRf10783-akr	1	LOC_Os01g69830
LOC_Os06g05650	1	osa-miRf10863-akr				osa-miRf10792-akr	1	LOC_Os01g68050
LOC_Os06g05830	1	osa-miRf10773-akr				osa-miRf10793-akr	1	LOC_Os03g31690
LOC_Os06g06050	1	osa-miR528				osa-miRf10795-akr	1	LOC_Os05g43880
LOC_Os06g06120	1	osa-miRf10377-akr				osa-miRf10797-akr	1	LOC_Os06g46670
LOC_Os06g06320	1	osa-miRf10519-akr				osa-miRf10798-akr	1	LOC_Os04g54474
LOC_Os06g07896	1	osa-miRf11370-akr				osa-miRf10799-akr	1	LOC_Os09g33680
LOC_Os06g10580	1	osa-miRf11746-akr				osa-miRf10811-akr	1	LOC_Os05g29760
LOC_Os06g11290	1	osa-miRf10319-akr				osa-miRf10817-akr	1	LOC_Os10g35980
LOC_Os06g11490	1	osa-miR408				osa-miRf10818-akr	1	LOC_Os01g68320
LOC_Os06g11860	1	osa-miRf12029-akr				osa-miRf10823-akr	1	LOC_Os01g51870
LOC_Os06g12310	1	osa-miRf11285-akr				osa-miRf10825-akr	1	LOC_Os08g13430
LOC_Os06g12810	1	osa-miRf11025-akr				osa-miRf10831-akr	1	LOC_Os03g22200
LOC_Os06g13040	1	osa-miRf11680-akr				osa-miRf10832-akr	1	LOC_Os06g29430
LOC_Os06g14412	1	osa-miR413				osa-miRf10836-akr	1	LOC_Os01g33800
LOC_Os06g15400	1	osa-miRf11341-akr				osa-miRf10837-akr	1	LOC_Os01g33800
LOC_Os06g16410	1	osa-miRf10620-akr				osa-miRf10838-akr	1	LOC_Os01g33800
LOC_Os06g17460	1	osa-miRf11025-akr				osa-miRf10839-akr	1	LOC_Os05g08450
LOC_Os06g19110	1	osa-miRf10178-akr				osa-miRf10843-akr	1	LOC_Os09g24370
LOC_Os06g19390	1	osa-miRf11943-akr				osa-miRf10845-akr	1	LOC_Os05g18294
LOC_Os06g19630	1	osa-miRf10084-akr				osa-miRf10847-akr	1	LOC_Os11g25780
LOC_Os06g19690	1	osa-miRf10519-akr				osa-miRf10849-akr	1	LOC_Os04g43660
LOC_Os06g20370	1	osa-miRf12044-akr				osa-miRf10854-akr	1	LOC_Os05g18294
LOC_Os06g21380	1	osa-miRf11878-akr				osa-miRf10856-akr	1	LOC_Os08g13430
LOC_Os06g22390	1	osa-miRf10063-akr				osa-miRf10858-akr	1	LOC_Os05g18294
LOC_Os06g24704	1	osa-miRf11714-akr				osa-miRf10860-akr	1	LOC_Os03g16010
LOC_Os06g24730	1	osa-miRf10734-akr				osa-miRf10865-akr	1	LOC_Os05g34700
LOC_Os06g33520	1	osa-miR414				osa-miRf10866-akr	1	LOC_Os01g51870
LOC_Os06g34700	1	osa-miRf10323-akr				osa-miRf10867-akr	1	LOC_Os03g15780
LOC_Os06g35660	1	osa-miRf10238-akr				osa-miRf10880-akr	1	LOC_Os08g13430
LOC_Os06g37080	1	osa-miRf11073-akr				osa-miRf10885-akr	1	LOC_Os01g15448
LOC_Os06g37560	1	osa-miR1848				osa-miRf10890-akr	1	LOC_Os04g57430
LOC_Os06g38510	1	osa-miRf11656-akr				osa-miRf10891-akr	1	LOC_Os05g18294
LOC_Os06g38594	1	osa-miR2103				osa-miRf10892-akr	1	LOC_Os06g05190
LOC_Os06g38970	1	osa-miRf10223-akr				osa-miRf10895-akr	1	LOC_Os07g32170
LOC_Os06g40370	1	osa-miRf10781-akr				osa-miRf10898-akr	1	LOC_Os08g02690
LOC_Os06g40880	1	osa-miR531b				osa-miRf10904-akr	1	LOC_Os08g13430
LOC_Os06g41910	1	osa-miRf10063-akr				osa-miRf10905-akr	1	LOC_Os11g06570
LOC_Os06g42000	1	osa-miRf10079-akr				osa-miRf10906-akr	1	LOC_Os12g43580
LOC_Os06g43430	1	osa-miRf10223-akr				osa-miRf10912-akr	1	LOC_Os11g41034
LOC_Os06g43800	1	osa-miR1320				osa-miRf10915-akr	1	LOC_Os08g38810
LOC_Os06g44010	1	osa-miRf12029-akr				osa-miRf10919-akr	1	LOC_Os08g13430
LOC_Os06g44060	1	osa-miRf10150-akr				osa-miRf10922-akr	1	LOC_Os11g06570
LOC_Os06g44144	1	osa-miRf10273-akr				osa-miRf10923-akr	1	LOC_Os11g06570
LOC_Os06g44250	1	osa-miRf12029-akr				osa-miRf10924-akr	1	LOC_Os11g08090
LOC_Os06g45140	1	osa-miRf11579-akr				osa-miRf10925-akr	1	LOC_Os08g13430
LOC_Os06g45990	1	osa-miRf10226-akr				osa-miRf10930-akr	1	LOC_Os06g45940
LOC_Os06g46030	1	osa-miRf12002-akr				osa-miRf10931-akr	1	LOC_Os02g12939
LOC_Os06g46310	1	osa-miRf10223-akr				osa-miRf10934-akr	1	LOC_Os03g07570
LOC_Os06g46500	1	osa-miRf10462-akr				osa-miRf10937-akr	1	LOC_Os11g25780
LOC_Os06g46910	1	osa-miRf10223-akr				osa-miRf10941-akr	1	LOC_Os05g49420
LOC_Os06g47580	1	osa-miRf11167-akr				osa-miRf10942-akr	1	LOC_Os05g49420
LOC_Os06g47650	1	osa-miRf10153-akr				osa-miRf10944-akr	1	LOC_Os01g68320
LOC_Os06g47860	1	osa-miRf11026-akr				osa-miRf10945-akr	1	LOC_Os01g68320
LOC_Os06g47900	1	osa-miR414				osa-miRf10946-akr	1	LOC_Os01g68320
LOC_Os06g48180	1	osa-miRf10261-akr				osa-miRf10951-akr	1	LOC_Os03g02160
LOC_Os06g48300	1	osa-miR2091-5p				osa-miRf10961-akr	1	LOC_Os04g46670
LOC_Os06g48620	1	osa-miRf10615-akr				osa-miRf10965-akr	1	LOC_Os08g13430
LOC_Os06g49220	1	osa-miRf11274-akr				osa-miRf10975-akr	1	LOC_Os12g02640
LOC_Os06g49430	1	osa-miR1429-5p				osa-miRf10977-akr	1	LOC_Os08g13430
LOC_Os06g49640	1	osa-miRf10223-akr				osa-miRf10981-akr	1	LOC_Os08g03560
LOC_Os06g49780	1	osa-miRf11992-akr				osa-miRf10987-akr	1	LOC_Os05g37160
LOC_Os06g50300	1	osa-miRf11495-akr				osa-miRf10988-akr	1	LOC_Os08g13430
LOC_Os06g50930	1	osa-miRf11578-akr				osa-miRf10997-akr	1	LOC_Os08g13430
LOC_Os06g51110	1	osa-miRf12043-akr				osa-miRf10999-akr	1	LOC_Os06g08720
LOC_Os06g51450	1	osa-miRf11518-akr				osa-miRf11000-akr	1	LOC_Os01g65130
LOC_Os07g02250	1	osa-miRf11346-akr				osa-miRf11004-akr	1	LOC_Os08g13430
LOC_Os07g03730	1	osa-miRf10040-akr				osa-miRf11005-akr	1	LOC_Os04g53190
LOC_Os07g04690	1	osa-miR444d.3				osa-miRf11006-akr	1	LOC_Os08g13430
LOC_Os07g05110	1	osa-miRf11884-akr				osa-miRf11007-akr	1	LOC_Os08g13430
LOC_Os07g06890	1	osa-miRf11628-akr				osa-miRf11016-akr	1	LOC_Os09g21180
LOC_Os07g06970	1	osa-miRf11581-akr				osa-miRf11017-akr	1	LOC_Os07g44330
LOC_Os07g07040	1	osa-miR414				osa-miRf11018-akr	1	LOC_Os08g13430
LOC_Os07g07310	1	osa-miR414				osa-miRf11021-akr	1	LOC_Os08g13430
LOC_Os07g07974	1	osa-miRf10935-akr				osa-miRf11022-akr	1	LOC_Os08g13430
LOC_Os07g09420	1	osa-miRf11495-akr				osa-miRf11028-akr	1	LOC_Os08g34390
LOC_Os07g09710	1	osa-miRf11073-akr				osa-miRf11035-akr	1	LOC_Os06g13190
LOC_Os07g09870	1	osa-miRf12024-akr				osa-miRf11036-akr	1	LOC_Os11g13880
LOC_Os07g10150	1	osa-miR414				osa-miRf11038-akr	1	LOC_Os03g22050
LOC_Os07g10350	1	osa-miRf10840-akr				osa-miRf11039-akr	1	LOC_Os08g43500
LOC_Os07g10840	1	osa-miRf11053-akr				osa-miRf11041-akr	1	LOC_Os01g14100
LOC_Os07g11360	1	osa-miRf11025-akr				osa-miRf11048-akr	1	LOC_Os12g01580
LOC_Os07g12810	1	osa-miR415				osa-miRf11054-akr	1	LOC_Os05g18294
LOC_Os07g13030	1	osa-miRf11025-akr				osa-miRf11063-akr	1	LOC_Os01g33800
LOC_Os07g14270	1	osa-miR414				osa-miRf11066-akr	1	LOC_Os08g13430
LOC_Os07g17970	1	osa-miRf10947-akr				osa-miRf11067-akr	1	LOC_Os06g23870
LOC_Os07g18162	1	osa-miRf10150-akr				osa-miRf11072-akr	1	LOC_Os03g02160
LOC_Os07g27790	1	osa-miR408				osa-miRf11074-akr	1	LOC_Os04g38810
LOC_Os07g28820	1	osa-miRf10615-akr				osa-miRf11076-akr	1	LOC_Os03g48320
LOC_Os07g29240	1	osa-miRf11025-akr				osa-miRf11081-akr	1	LOC_Os05g43880
LOC_Os07g29410	1	osa-miRf11185-akr				osa-miRf11086-akr	1	LOC_Os09g38090
LOC_Os07g30670	1	osa-miRf11530-akr				osa-miRf11089-akr	1	LOC_Os01g67890
LOC_Os07g30810	1	osa-miR414				osa-miRf11093-akr	1	LOC_Os07g08710
LOC_Os07g32420	1	osa-miRf10803-akr				osa-miRf11100-akr	1	LOC_Os08g03290
LOC_Os07g34340	1	osa-miRf11040-akr				osa-miRf11103-akr	1	LOC_Os11g41034
LOC_Os07g34370	1	osa-miRf11073-akr				osa-miRf11110-akr	1	LOC_Os11g25780
LOC_Os07g35290	1	osa-miR437				osa-miRf11111-akr	1	LOC_Os08g13430
LOC_Os07g36170	1	osa-miRf10251-akr				osa-miRf11112-akr	1	LOC_Os11g25780
LOC_Os07g36190	1	osa-miRf10676-akr				osa-miRf11118-akr	1	LOC_Os11g10510
LOC_Os07g36390	1	osa-miRf11969-akr				osa-miRf11119-akr	1	LOC_Os04g32540
LOC_Os07g36544	1	osa-miRf11407-akr				osa-miRf11121-akr	1	LOC_Os11g09940
LOC_Os07g36800	1	osa-miRf11407-akr				osa-miRf11125-akr	1	LOC_Os11g06570
LOC_Os07g37620	1	osa-miRf12002-akr				osa-miRf11128-akr	1	LOC_Os06g13190
LOC_Os07g38110	1	osa-miRf10622-akr				osa-miRf11130-akr	1	LOC_Os08g13430
LOC_Os07g38840	1	osa-miRf12069-akr				osa-miRf11134-akr	1	LOC_Os09g04440
LOC_Os07g40040	1	osa-miRf10863-akr				osa-miRf11137-akr	1	LOC_Os05g18294
LOC_Os07g40290	1	osa-miRf10620-akr				osa-miRf11153-akr	1	LOC_Os10g09110
LOC_Os07g41070	1	osa-miRf11996-akr				osa-miRf11154-akr	1	LOC_Os05g34700
LOC_Os07g41160	1	osa-miRf10819-akr				osa-miRf11155-akr	1	LOC_Os01g60730
LOC_Os07g41190	1	osa-miR414				osa-miRf11161-akr	1	LOC_Os09g04440
LOC_Os07g41200	1	osa-miRf11439-akr				osa-miRf11172-akr	1	LOC_Os06g21890
LOC_Os07g41740	1	osa-miRf11314-akr				osa-miRf11173-akr	1	LOC_Os09g32840
LOC_Os07g42070	1	osa-miRf11164-akr				osa-miRf11174-akr	1	LOC_Os11g25780
LOC_Os07g42370	1	osa-miRf10465-akr				osa-miRf11177-akr	1	LOC_Os06g21890
LOC_Os07g42420	1	osa-miR1848				osa-miRf11178-akr	1	LOC_Os06g21890
LOC_Os07g42626	1	osa-miR1439				osa-miRf11183-akr	1	LOC_Os02g55480
LOC_Os07g42860	1	osa-miRf11501-akr				osa-miRf11185-akr	1	LOC_Os07g29410
LOC_Os07g43322	1	osa-miRf11856-akr				osa-miRf11190-akr	1	LOC_Os07g04990
LOC_Os07g43570	1	osa-miR1848				osa-miRf11192-akr	1	LOC_Os04g36050
LOC_Os07g43670	1	osa-miRf10481-akr				osa-miRf11195-akr	1	LOC_Os02g05890
LOC_Os07g44020	1	osa-miRf10863-akr				osa-miRf11197-akr	1	LOC_Os03g15780
LOC_Os07g44640	1	osa-miR414				osa-miRf11199-akr	1	LOC_Os02g44120
LOC_Os07g45000	1	osa-miRf10467-akr				osa-miRf11201-akr	1	LOC_Os08g13430
LOC_Os07g45080	1	osa-miRf11341-akr				osa-miRf11207-akr	1	LOC_Os06g13190
LOC_Os07g46280	1	osa-miRf11014-akr				osa-miRf11227-akr	1	LOC_Os08g13430
LOC_Os07g46670	1	osa-miR1868				osa-miRf11228-akr	1	LOC_Os05g18294
LOC_Os07g46846	1	osa-miRf12010-akr				osa-miRf11230-akr	1	LOC_Os05g18294
LOC_Os07g47490	1	osa-miRf10678-akr				osa-miRf11233-akr	1	LOC_Os05g37160
LOC_Os07g47510	1	osa-miRf11886-akr				osa-miRf11234-akr	1	LOC_Os08g13430
LOC_Os07g47590	1	osa-miRf10738-akr				osa-miRf11237-akr	1	LOC_Os08g13430
LOC_Os07g48100	1	osa-miRf10781-akr				osa-miRf11239-akr	1	LOC_Os12g39120
LOC_Os07g48160	1	osa-miRf11013-akr				osa-miRf11241-akr	1	LOC_Os01g67360
LOC_Os07g48280	1	osa-miRf11703-akr				osa-miRf11244-akr	1	LOC_Os05g18294
LOC_Os07g48830	1	osa-miRf10063-akr				osa-miRf11247-akr	1	LOC_Os11g25780
LOC_Os07g49230	1	osa-miRf11513-akr				osa-miRf11250-akr	1	LOC_Os08g13430
LOC_Os07g49300	1	osa-miRf11414-akr				osa-miRf11255-akr	1	LOC_Os11g06570
LOC_Os08g01170	1	osa-miRf11170-akr				osa-miRf11263-akr	1	LOC_Os05g18294
LOC_Os08g01420	1	osa-miRf11160-akr				osa-miRf11264-akr	1	LOC_Os03g22050
LOC_Os08g01830	1	osa-miRf10105-akr				osa-miRf11268-akr	1	LOC_Os02g08410
LOC_Os08g01840	1	osa-miRf10213-akr				osa-miRf11274-akr	1	LOC_Os06g49220
LOC_Os08g01950	1	osa-miRf10947-akr				osa-miRf11275-akr	1	LOC_Os11g45750
LOC_Os08g02110	1	osa-miR1848				osa-miRf11276-akr	1	LOC_Os01g31870
LOC_Os08g02630	1	osa-miRf10273-akr				osa-miRf11278-akr	1	LOC_Os08g39550
LOC_Os08g02690	1	osa-miRf10898-akr				osa-miRf11280-akr	1	LOC_Os08g13430
LOC_Os08g03560	1	osa-miRf10981-akr				osa-miRf11282-akr	1	LOC_Os05g15330
LOC_Os08g03990	1	osa-miR2102-5p				osa-miRf11283-akr	1	LOC_Os02g30100
LOC_Os08g04130	1	osa-miRf11347-akr				osa-miRf11289-akr	1	LOC_Os08g18974
LOC_Os08g04340	1	osa-miRf10768-akr				osa-miRf11290-akr	1	LOC_Os11g25780
LOC_Os08g06040	1	osa-miRf10079-akr				osa-miRf11291-akr	1	LOC_Os05g18294
LOC_Os08g06280	1	osa-miRf11665-akr				osa-miRf11297-akr	1	LOC_Os05g18294
LOC_Os08g06470	1	osa-miR414				osa-miRf11311-akr	1	LOC_Os11g06570
LOC_Os08g06630	1	osa-miRf11341-akr				osa-miRf11313-akr	1	LOC_Os08g13430
LOC_Os08g07060	1	osa-miRf11553-akr				osa-miRf11314-akr	1	LOC_Os07g41740
LOC_Os08g07290	1	osa-miRf10224-akr				osa-miRf11320-akr	1	LOC_Os03g12900
LOC_Os08g08960	1	osa-miRf10412-akr				osa-miRf11321-akr	1	LOC_Os02g39570
LOC_Os08g09240	1	osa-miRf12022-akr				osa-miRf11322-akr	1	LOC_Os05g18294
LOC_Os08g09270	1	osa-miR414				osa-miRf11323-akr	1	LOC_Os03g48320
LOC_Os08g09340	1	osa-miRf12029-akr				osa-miRf11325-akr	1	LOC_Os11g25780
LOC_Os08g09350	1	osa-miR414				osa-miRf11326-akr	1	LOC_Os05g18294
LOC_Os08g12410	1	osa-miRf11623-akr				osa-miRf11329-akr	1	LOC_Os08g13430
LOC_Os08g13360	1	osa-miRf11356-akr				osa-miRf11338-akr	1	LOC_Os08g13430
LOC_Os08g14440	1	osa-miR2094-5p				osa-miRf11339-akr	1	LOC_Os08g13430
LOC_Os08g15444	1	osa-miRf11158-akr				osa-miRf11345-akr	1	LOC_Os04g56790
LOC_Os08g16050	1	osa-miRf10496-akr				osa-miRf11351-akr	1	LOC_Os08g13430
LOC_Os08g17390	1	osa-miRf11267-akr				osa-miRf11353-akr	1	LOC_Os01g10320
LOC_Os08g19210	1	osa-miRf10481-akr				osa-miRf11354-akr	1	LOC_Os03g58790
LOC_Os08g21900	1	osa-miRf10871-akr				osa-miRf11359-akr	1	LOC_Os06g13190
LOC_Os08g23410	1	osa-miRf10329-akr				osa-miRf11361-akr	1	LOC_Os11g13880
LOC_Os08g25700	1	osa-miR2102-3p				osa-miRf11367-akr	1	LOC_Os05g18294
LOC_Os08g27170	1	osa-miR414				osa-miRf11368-akr	1	LOC_Os05g18294
LOC_Os08g29150	1	osa-miRf10928-akr				osa-miRf11370-akr	1	LOC_Os06g07896
LOC_Os08g29160	1	osa-miRf10947-akr				osa-miRf11371-akr	1	LOC_Os09g04310
LOC_Os08g29600	1	osa-miRf12029-akr				osa-miRf11375-akr	1	LOC_Os05g18294
LOC_Os08g29669	1	osa-miRf11047-akr				osa-miRf11377-akr	1	LOC_Os05g50380
LOC_Os08g30020	1	osa-miR1854-5p				osa-miRf11378-akr	1	LOC_Os04g50216
LOC_Os08g30800	1	osa-miRf10449-akr				osa-miRf11379-akr	1	LOC_Os05g18294
LOC_Os08g31030	1	osa-miR1862e				osa-miRf11387-akr	1	LOC_Os02g50830
LOC_Os08g31090	1	osa-miRf11341-akr				osa-miRf11388-akr	1	LOC_Os05g18294
LOC_Os08g31950	1	osa-miRf11969-akr				osa-miRf11391-akr	1	LOC_Os05g43880
LOC_Os08g32370	1	osa-miRf11518-akr				osa-miRf11397-akr	1	LOC_Os05g18294
LOC_Os08g32920	1	osa-miRf11025-akr				osa-miRf11402-akr	1	LOC_Os12g25690
LOC_Os08g33540	1	osa-miRf10768-akr				osa-miRf11405-akr	1	LOC_Os03g61430
LOC_Os08g34050	1	osa-miRf10429-akr				osa-miRf11406-akr	1	LOC_Os05g18294
LOC_Os08g34170	1	osa-miRf10185-akr				osa-miRf11412-akr	1	LOC_Os08g13430
LOC_Os08g34240	1	osa-miRf11014-akr				osa-miRf11415-akr	1	LOC_Os01g08460
LOC_Os08g34330	1	osa-miR2102-5p				osa-miRf11417-akr	1	LOC_Os01g33800
LOC_Os08g34390	1	osa-miRf11028-akr				osa-miRf11421-akr	1	LOC_Os11g41034
LOC_Os08g35600	1	osa-miRf11260-akr				osa-miRf11423-akr	1	LOC_Os05g18294
LOC_Os08g35710	1	osa-miRf10458-akr				osa-miRf11426-akr	1	LOC_Os08g13430
LOC_Os08g35740	1	osa-miRf11181-akr				osa-miRf11427-akr	1	LOC_Os08g13430
LOC_Os08g36480	1	osa-miRf11620-akr				osa-miRf11428-akr	1	LOC_Os08g13430
LOC_Os08g36760	1	osa-miRf11622-akr				osa-miRf11429-akr	1	LOC_Os06g21890
LOC_Os08g36860	1	osa-miRf10462-akr				osa-miRf11430-akr	1	LOC_Os11g06570
LOC_Os08g37280	1	osa-miRf10094-akr				osa-miRf11438-akr	1	LOC_Os11g16280
LOC_Os08g37444	1	osa-miRf10406-akr				osa-miRf11439-akr	1	LOC_Os07g41200
LOC_Os08g37940	1	osa-miR2098-5p				osa-miRf11442-akr	1	LOC_Os08g13430
LOC_Os08g39140	1	osa-miR414				osa-miRf11445-akr	1	LOC_Os02g26650
LOC_Os08g39460	1	osa-miR1848				osa-miRf11449-akr	1	LOC_Os05g18294
LOC_Os08g39840	1	osa-miRf10273-akr				osa-miRf11450-akr	1	LOC_Os11g25780
LOC_Os08g40180	1	osa-miR2102-5p				osa-miRf11451-akr	1	LOC_Os05g18294
LOC_Os08g41390	1	osa-miRf11159-akr				osa-miRf11456-akr	1	LOC_Os08g13430
LOC_Os08g41400	1	osa-miRf11435-akr				osa-miRf11468-akr	1	LOC_Os09g32680
LOC_Os08g41710	1	osa-miRf11848-akr				osa-miRf11469-akr	1	LOC_Os07g42730
LOC_Os08g42440	1	osa-miRf11390-akr				osa-miRf11475-akr	1	LOC_Os06g21890
LOC_Os08g43180	1	osa-miRf12029-akr				osa-miRf11478-akr	1	LOC_Os05g18294
LOC_Os08g44270	1	osa-miRf11025-akr				osa-miRf11479-akr	1	LOC_Os08g13430
LOC_Os09g02729	1	osa-miRf11513-akr				osa-miRf11483-akr	1	LOC_Os05g18294
LOC_Os09g04050	1	osa-miRf11408-akr				osa-miRf11486-akr	1	LOC_Os08g03290
LOC_Os09g04310	1	osa-miRf11371-akr				osa-miRf11489-akr	1	LOC_Os05g18294
LOC_Os09g06560	1	osa-miR414				osa-miRf11492-akr	1	LOC_Os08g13430
LOC_Os09g09930	1	osa-miRf10819-akr				osa-miRf11493-akr	1	LOC_Os11g25780
LOC_Os09g10274	1	osa-miR1856				osa-miRf11496-akr	1	LOC_Os08g13430
LOC_Os09g10340	1	osa-miRf10710-akr				osa-miRf11499-akr	1	LOC_Os05g18294
LOC_Os09g11480	1	osa-miRf11341-akr				osa-miRf11500-akr	1	LOC_Os02g03040
LOC_Os09g12750	1	osa-miRf11259-akr				osa-miRf11501-akr	1	LOC_Os07g42860
LOC_Os09g13680	1	osa-miRf10491-akr				osa-miRf11505-akr	1	LOC_Os03g22610
LOC_Os09g15420	1	osa-miR1433				osa-miRf11508-akr	1	LOC_Os02g08410
LOC_Os09g15770	1	osa-miR414				osa-miRf11510-akr	1	LOC_Os02g08410
LOC_Os09g17600	1	osa-miRf11615-akr				osa-miRf11516-akr	1	LOC_Os01g15270
LOC_Os09g17620	1	osa-miRf11579-akr				osa-miRf11520-akr	1	LOC_Os05g18294
LOC_Os09g19229	1	osa-miRf10069-akr				osa-miRf11525-akr	1	LOC_Os08g07840
LOC_Os09g19390	1	osa-miRf11570-akr				osa-miRf11527-akr	1	LOC_Os11g06570
LOC_Os09g19400	1	osa-miRf10485-akr				osa-miRf11528-akr	1	LOC_Os11g47460
LOC_Os09g19970	1	osa-miRf11502-akr				osa-miRf11537-akr	1	LOC_Os05g18294
LOC_Os09g20240	1	osa-miR1848				osa-miRf11539-akr	1	LOC_Os01g15448
LOC_Os09g21180	1	osa-miRf11016-akr				osa-miRf11540-akr	1	LOC_Os05g18294
LOC_Os09g23350	1	osa-miRf11310-akr				osa-miRf11542-akr	1	LOC_Os05g18294
LOC_Os09g24370	1	osa-miRf10843-akr				osa-miRf11543-akr	1	LOC_Os04g38570
LOC_Os09g24690	1	osa-miRf10079-akr				osa-miRf11548-akr	1	LOC_Os08g13430
LOC_Os09g24900	1	osa-miRf10750-akr				osa-miRf11552-akr	1	LOC_Os11g06570
LOC_Os09g24990	1	osa-miRf10563-akr				osa-miRf11554-akr	1	LOC_Os02g45250
LOC_Os09g25090	1	osa-miRf11495-akr				osa-miRf11556-akr	1	LOC_Os06g40220
LOC_Os09g25760	1	osa-miRf10496-akr				osa-miRf11561-akr	1	LOC_Os05g43880
LOC_Os09g25900	1	osa-miR529b				osa-miRf11563-akr	1	LOC_Os11g25780
LOC_Os09g26170	1	osa-miRf10184-akr				osa-miRf11569-akr	1	LOC_Os08g13430
LOC_Os09g26460	1	osa-miRf10947-akr				osa-miRf11572-akr	1	LOC_Os09g35630
LOC_Os09g26730	1	osa-miRf10246-akr				osa-miRf11574-akr	1	LOC_Os11g06570
LOC_Os09g26780	1	osa-miRf10970-akr				osa-miRf11578-akr	1	LOC_Os06g50930
LOC_Os09g26880	1	osa-miRf11047-akr				osa-miRf11582-akr	1	LOC_Os05g18294
LOC_Os09g27030	1	osa-miRf10069-akr				osa-miRf11584-akr	1	LOC_Os06g40220
LOC_Os09g27210	1	osa-miRf11473-akr				osa-miRf11585-akr	1	LOC_Os01g33800
LOC_Os09g27590	1	osa-miRf11530-akr				osa-miRf11587-akr	1	LOC_Os11g25780
LOC_Os09g27750	1	osa-miRf11613-akr				osa-miRf11588-akr	1	LOC_Os05g18294
LOC_Os09g28510	1	osa-miRf11095-akr				osa-miRf11590-akr	1	LOC_Os05g18294
LOC_Os09g28580	1	osa-miRf10632-akr				osa-miRf11595-akr	1	LOC_Os01g07970
LOC_Os09g28690	1	osa-miR1848				osa-miRf11602-akr	1	LOC_Os03g22790
LOC_Os09g29890	1	osa-miR414				osa-miRf11606-akr	1	LOC_Os05g18294
LOC_Os09g30120	1	osa-miRf11728-akr				osa-miRf11607-akr	1	LOC_Os05g18294
LOC_Os09g30160	1	osa-miRf11518-akr				osa-miRf11608-akr	1	LOC_Os04g40740
LOC_Os09g30210	1	osa-miRf11538-akr				osa-miRf11609-akr	1	LOC_Os02g39570
LOC_Os09g30350	1	osa-miR414				osa-miRf11610-akr	1	LOC_Os03g16170
LOC_Os09g30390	1	osa-miRf10273-akr				osa-miRf11611-akr	1	LOC_Os04g57540
LOC_Os09g31502	1	osa-miRf10185-akr				osa-miRf11620-akr	1	LOC_Os08g36480
LOC_Os09g32330	1	osa-miRf12029-akr				osa-miRf11621-akr	1	LOC_Os08g38560
LOC_Os09g32690	1	osa-miRf10286-akr				osa-miRf11629-akr	1	LOC_Os04g32980
LOC_Os09g32840	1	osa-miRf11173-akr				osa-miRf11643-akr	1	LOC_Os05g37160
LOC_Os09g32964	1	osa-miRf11495-akr				osa-miRf11652-akr	1	LOC_Os02g39570
LOC_Os09g34000	1	osa-miRf10458-akr				osa-miRf11653-akr	1	LOC_Os08g13430
LOC_Os09g35030	1	osa-miRf10185-akr				osa-miRf11658-akr	1	LOC_Os03g58580
LOC_Os09g36060	1	osa-miR414				osa-miRf11660-akr	1	LOC_Os06g43210
LOC_Os09g36200	1	osa-miRf11495-akr				osa-miRf11662-akr	1	LOC_Os01g54450
LOC_Os09g36350	1	osa-miRf11047-akr				osa-miRf11663-akr	1	LOC_Os02g08410
LOC_Os09g36930	1	osa-miRf11073-akr				osa-miRf11666-akr	1	LOC_Os11g06570
LOC_Os09g37012	1	osa-miRf11193-akr				osa-miRf11667-akr	1	LOC_Os04g33490
LOC_Os09g38320	1	osa-miRf11267-akr				osa-miRf11669-akr	1	LOC_Os11g25780
LOC_Os09g38340	1	osa-miR2102-5p				osa-miRf11670-akr	1	LOC_Os11g25780
LOC_Os09g38400	1	osa-miR414				osa-miRf11672-akr	1	LOC_Os06g01490
LOC_Os09g38910	1	osa-miRf11638-akr				osa-miRf11674-akr	1	LOC_Os10g18070
LOC_Os09g39070	1	osa-miRf10319-akr				osa-miRf11675-akr	1	LOC_Os07g43020
LOC_Os09g39310	1	osa-miRf11458-akr				osa-miRf11683-akr	1	LOC_Os08g13430
LOC_Os09g39570	1	osa-miRf10002-akr				osa-miRf11684-akr	1	LOC_Os05g18294
LOC_Os09g39940	1	osa-miRf10462-akr				osa-miRf11685-akr	1	LOC_Os03g22790
LOC_Os10g02500	1	osa-miRf10223-akr				osa-miRf11687-akr	1	LOC_Os11g37050
LOC_Os10g03669	1	osa-miRf10273-akr				osa-miRf11689-akr	1	LOC_Os10g38540
LOC_Os10g03730	1	osa-miR414				osa-miRf11691-akr	1	LOC_Os01g21144
LOC_Os10g04700	1	osa-miRf12029-akr				osa-miRf11692-akr	1	LOC_Os02g04840
LOC_Os10g05790	1	osa-miRf11880-akr				osa-miRf11694-akr	1	LOC_Os05g15330
LOC_Os10g08319	1	osa-miRf10576-akr				osa-miRf11696-akr	1	LOC_Os06g40220
LOC_Os10g09110	1	osa-miRf11153-akr				osa-miRf11697-akr	1	LOC_Os06g40220
LOC_Os10g10180	1	osa-miRf11872-akr				osa-miRf11698-akr	1	LOC_Os01g33800
LOC_Os10g10870	1	osa-miRf11774-akr				osa-miRf11703-akr	1	LOC_Os07g48280
LOC_Os10g17260	1	osa-miRf11518-akr				osa-miRf11706-akr	1	LOC_Os08g13430
LOC_Os10g17650	1	osa-miRf11842-akr				osa-miRf11707-akr	1	LOC_Os11g06570
LOC_Os10g18070	1	osa-miRf11674-akr				osa-miRf11711-akr	1	LOC_Os01g33800
LOC_Os10g18400	1	osa-miRf11806-akr				osa-miRf11713-akr	1	LOC_Os08g04460
LOC_Os10g20470	1	osa-miRf12007-akr				osa-miRf11716-akr	1	LOC_Os08g13430
LOC_Os10g21110	1	osa-miRf11940-akr				osa-miRf11718-akr	1	LOC_Os05g18294
LOC_Os10g21860	1	osa-miRf10264-akr				osa-miRf11723-akr	1	LOC_Os05g06320
LOC_Os10g21930	1	osa-miRf11344-akr				osa-miRf11724-akr	1	LOC_Os01g62900
LOC_Os10g22300	1	osa-miRf11772-akr				osa-miRf11725-akr	1	LOC_Os11g06570
LOC_Os10g22830	1	osa-miRf10273-akr				osa-miRf11728-akr	1	LOC_Os09g30120
LOC_Os10g22960	1	osa-miRf10650-akr				osa-miRf11729-akr	1	LOC_Os01g18050
LOC_Os10g23050	1	osa-miRf12002-akr				osa-miRf11730-akr	1	LOC_Os10g38040
LOC_Os10g24370	1	osa-miRf10603-akr				osa-miRf11741-akr	1	LOC_Os06g21480
LOC_Os10g25030	1	osa-miRf10261-akr				osa-miRf11743-akr	1	LOC_Os01g67950
LOC_Os10g25060	1	osa-miRf10828-akr				osa-miRf11748-akr	1	LOC_Os08g13430
LOC_Os10g28230	1	osa-miRf11647-akr				osa-miRf11749-akr	1	LOC_Os11g25780
LOC_Os10g31820	1	osa-miRf11025-akr				osa-miRf11755-akr	1	LOC_Os08g13430
LOC_Os10g31830	1	osa-miRf10829-akr				osa-miRf11757-akr	1	LOC_Os08g13430
LOC_Os10g32110	1	osa-miRf10947-akr				osa-miRf11759-akr	1	LOC_Os04g58820
LOC_Os10g32740	1	osa-miRf10153-akr				osa-miRf11763-akr	1	LOC_Os05g18294
LOC_Os10g32810	1	osa-miRf10273-akr				osa-miRf11765-akr	1	LOC_Os01g15580
LOC_Os10g33170	1	osa-miRf12007-akr				osa-miRf11767-akr	1	LOC_Os01g62070
LOC_Os10g34480	1	osa-miRf10034-akr				osa-miRf11770-akr	1	LOC_Os05g18294
LOC_Os10g34790	1	osa-miRf10629-akr				osa-miRf11771-akr	1	LOC_Os05g18294
LOC_Os10g35630	1	osa-miRf10819-akr				osa-miRf11776-akr	1	LOC_Os06g21890
LOC_Os10g35810	1	osa-miR1850.1				osa-miRf11786-akr	1	LOC_Os08g31850
LOC_Os10g35950	1	osa-miRf11025-akr				osa-miRf11792-akr	1	LOC_Os08g13430
LOC_Os10g35980	1	osa-miRf10817-akr				osa-miRf11795-akr	1	LOC_Os09g32010
LOC_Os10g36490	1	osa-miRf10017-akr				osa-miRf11796-akr	1	LOC_Os09g35630
LOC_Os10g36924	1	osa-miRf11473-akr				osa-miRf11798-akr	1	LOC_Os05g18294
LOC_Os10g37340	1	osa-miRf10153-akr				osa-miRf11800-akr	1	LOC_Os11g25780
LOC_Os10g37480	1	osa-miRf10819-akr				osa-miRf11802-akr	1	LOC_Os08g13430
LOC_Os10g37500	1	osa-miRf10202-akr				osa-miRf11803-akr	1	LOC_Os06g12790
LOC_Os10g37760	1	osa-miRf11613-akr				osa-miRf11804-akr	1	LOC_Os08g13430
LOC_Os10g38450	1	osa-miRf10065-akr				osa-miRf11809-akr	1	LOC_Os08g13430
LOC_Os10g39030	1	osa-miRf11047-akr				osa-miRf11810-akr	1	LOC_Os04g52900
LOC_Os10g39090	1	osa-miR529a				osa-miRf11812-akr	1	LOC_Os12g06910
LOC_Os10g39110	1	osa-miRf11295-akr				osa-miRf11813-akr	1	LOC_Os06g35160
LOC_Os10g39670	1	osa-miRf10813-akr				osa-miRf11815-akr	1	LOC_Os05g37450
LOC_Os10g39760	1	osa-miRf11533-akr				osa-miRf11816-akr	1	LOC_Os06g08080
LOC_Os10g39780	1	osa-miRf11627-akr				osa-miRf11817-akr	1	LOC_Os01g67890
LOC_Os10g39820	1	osa-miRf10533-akr				osa-miRf11818-akr	1	LOC_Os10g21910
LOC_Os10g40710	1	osa-miR443				osa-miRf11819-akr	1	LOC_Os08g13430
LOC_Os10g41330	1	osa-miR1320				osa-miRf11821-akr	1	LOC_Os03g50070
LOC_Os10g41410	1	osa-miRf10617-akr				osa-miRf11824-akr	1	LOC_Os03g24390
LOC_Os10g41560	1	osa-miR529a				osa-miRf11826-akr	1	LOC_Os06g13190
LOC_Os10g42690	1	osa-miRf10002-akr				osa-miRf11827-akr	1	LOC_Os08g13430
LOC_Os11g03390	1	osa-miRf10863-akr				osa-miRf11830-akr	1	LOC_Os11g42960
LOC_Os11g04104	1	osa-miRf10791-akr				osa-miRf11832-akr	1	LOC_Os05g18294
LOC_Os11g04390	1	osa-miR396f				osa-miRf11833-akr	1	LOC_Os08g13430
LOC_Os11g04520	1	osa-miR530-5p				osa-miRf11834-akr	1	LOC_Os05g18294
LOC_Os11g05170	1	osa-miRf10273-akr				osa-miRf11836-akr	1	LOC_Os01g68700
LOC_Os11g05540	1	osa-miR414				osa-miRf11837-akr	1	LOC_Os06g19400
LOC_Os11g05760	1	osa-miRf10496-akr				osa-miRf11843-akr	1	LOC_Os09g17152
LOC_Os11g05990	1	osa-miRf11632-akr				osa-miRf11845-akr	1	LOC_Os08g03290
LOC_Os11g07580	1	osa-miRf10519-akr				osa-miRf11846-akr	1	LOC_Os05g18294
LOC_Os11g08100	1	osa-miRf10863-akr				osa-miRf11849-akr	1	LOC_Os08g13430
LOC_Os11g08330	1	osa-miRf11145-akr				osa-miRf11852-akr	1	LOC_Os03g02160
LOC_Os11g08950	1	osa-miR1861a				osa-miRf11853-akr	1	LOC_Os04g55970
LOC_Os11g09010	1	osa-miRf11995-akr				osa-miRf11854-akr	1	LOC_Os04g55970
LOC_Os11g09940	1	osa-miRf11121-akr				osa-miRf11859-akr	1	LOC_Os01g50080
LOC_Os11g10510	1	osa-miRf11118-akr				osa-miRf11862-akr	1	LOC_Os07g49210
LOC_Os11g10750	1	osa-miRf10605-akr				osa-miRf11864-akr	1	LOC_Os11g06570
LOC_Os11g11240	1	osa-miRf10503-akr				osa-miRf11868-akr	1	LOC_Os08g13430
LOC_Os11g12050	1	osa-miRf11519-akr				osa-miRf11869-akr	1	LOC_Os08g13430
LOC_Os11g12650	1	osa-miRf10273-akr				osa-miRf11873-akr	1	LOC_Os06g23274
LOC_Os11g13560	1	osa-miRf10508-akr				osa-miRf11875-akr	1	LOC_Os11g25780
LOC_Os11g13890	1	osa-miRf11349-akr				osa-miRf11876-akr	1	LOC_Os11g06570
LOC_Os11g14220	1	osa-miR414				osa-miRf11879-akr	1	LOC_Os06g43210
LOC_Os11g16280	1	osa-miRf11438-akr				osa-miRf11884-akr	1	LOC_Os07g05110
LOC_Os11g19800	1	osa-miRf10076-akr				osa-miRf11886-akr	1	LOC_Os07g47510
LOC_Os11g20384	1	osa-miRf11164-akr				osa-miRf11894-akr	1	LOC_Os01g65130
LOC_Os11g22350	1	osa-miRf11045-akr				osa-miRf11896-akr	1	LOC_Os11g06570
LOC_Os11g26570	1	osa-miRf10013-akr				osa-miRf11898-akr	1	LOC_Os08g13430
LOC_Os11g26850	1	osa-miRf10223-akr				osa-miRf11901-akr	1	LOC_Os05g15330
LOC_Os11g26890	1	osa-miR414				osa-miRf11904-akr	1	LOC_Os05g18294
LOC_Os11g28104	1	osa-miRf10185-akr				osa-miRf11905-akr	1	LOC_Os03g22050
LOC_Os11g30810	1	osa-miRf10916-akr				osa-miRf11906-akr	1	LOC_Os06g45940
LOC_Os11g32240	1	osa-miRf10223-akr				osa-miRf11908-akr	1	LOC_Os02g07900
LOC_Os11g32260	1	osa-miRf11051-akr				osa-miRf11909-akr	1	LOC_Os12g38770
LOC_Os11g32890	1	osa-miRf12044-akr				osa-miRf11910-akr	1	LOC_Os03g22050
LOC_Os11g33000	1	osa-miRf11210-akr				osa-miRf11911-akr	1	LOC_Os06g20200
LOC_Os11g35400	1	osa-miRf10171-akr				osa-miRf11912-akr	1	LOC_Os03g01940
LOC_Os11g37510	1	osa-miR2104				osa-miRf11917-akr	1	LOC_Os07g37850
LOC_Os11g37700	1	osa-miRf11015-akr				osa-miRf11920-akr	1	LOC_Os08g13430
LOC_Os11g38030	1	osa-miRf10462-akr				osa-miRf11921-akr	1	LOC_Os05g01530
LOC_Os11g38520	1	osa-miR414				osa-miRf11927-akr	1	LOC_Os03g09860
LOC_Os11g40600	1	osa-miR2102-5p				osa-miRf11931-akr	1	LOC_Os03g27990
LOC_Os11g42220	1	osa-miR437				osa-miRf11939-akr	1	LOC_Os03g17164
LOC_Os11g42500	1	osa-miR414				osa-miRf11940-akr	1	LOC_Os10g21110
LOC_Os11g42960	1	osa-miRf11830-akr				osa-miRf11942-akr	1	LOC_Os08g13430
LOC_Os11g45750	1	osa-miRf11275-akr				osa-miRf11944-akr	1	LOC_Os05g18294
LOC_Os11g47460	1	osa-miRf11528-akr				osa-miRf11946-akr	1	LOC_Os05g18294
LOC_Os11g47970	1	osa-miRf10649-akr				osa-miRf11947-akr	1	LOC_Os11g25780
LOC_Os12g01449	1	osa-miRf11518-akr				osa-miRf11949-akr	1	LOC_Os04g32540
LOC_Os12g01560	1	osa-miRf10290-akr				osa-miRf11950-akr	1	LOC_Os03g39020
LOC_Os12g01580	1	osa-miRf11048-akr				osa-miRf11957-akr	1	LOC_Os05g18294
LOC_Os12g02250	1	osa-miRf10458-akr				osa-miRf11964-akr	1	LOC_Os08g13430
LOC_Os12g02640	1	osa-miRf10975-akr				osa-miRf11965-akr	1	LOC_Os08g13430
LOC_Os12g04290	1	osa-miRf11355-akr				osa-miRf11968-akr	1	LOC_Os05g18294
LOC_Os12g04650	1	osa-miRf12024-akr				osa-miRf11970-akr	1	LOC_Os08g13430
LOC_Os12g04924	1	osa-miRf10713-akr				osa-miRf11971-akr	1	LOC_Os05g18294
LOC_Os12g05210	1	osa-miRf10863-akr				osa-miRf11975-akr	1	LOC_Os08g13430
LOC_Os12g05970	1	osa-miR414				osa-miRf11977-akr	1	LOC_Os03g02160
LOC_Os12g06240	1	osa-miRf11990-akr				osa-miRf11978-akr	1	LOC_Os01g69904
LOC_Os12g06490	1	osa-miRf11090-akr				osa-miRf11981-akr	1	LOC_Os12g06910
LOC_Os12g07720	1	osa-miRf11518-akr				osa-miRf11984-akr	1	LOC_Os01g65130
LOC_Os12g08260	1	osa-miRf11267-akr				osa-miRf11985-akr	1	LOC_Os06g07600
LOC_Os12g09580	1	osa-miR414				osa-miRf11987-akr	1	LOC_Os05g18294
LOC_Os12g10540	1	osa-miRf10447-akr				osa-miRf11998-akr	1	LOC_Os06g23870
LOC_Os12g12260	1	osa-miRf11831-akr				osa-miRf11999-akr	1	LOC_Os05g15330
LOC_Os12g15470	1	osa-miRf11390-akr				osa-miRf12006-akr	1	LOC_Os06g21890
LOC_Os12g16010	1	osa-miRf10223-akr				osa-miRf12008-akr	1	LOC_Os08g03290
LOC_Os12g17490	1	osa-miRf10446-akr				osa-miRf12009-akr	1	LOC_Os08g13430
LOC_Os12g19381	1	osa-miRf11495-akr				osa-miRf12012-akr	1	LOC_Os08g13430
LOC_Os12g21734	1	osa-miRf11158-akr				osa-miRf12020-akr	1	LOC_Os11g25780
LOC_Os12g22120	1	osa-miRf11390-akr				osa-miRf12021-akr	1	LOC_Os02g39610
LOC_Os12g23180	1	osa-miRf11168-akr				osa-miRf12025-akr	1	LOC_Os05g18294
LOC_Os12g23760	1	osa-miR2098-5p				osa-miRf12027-akr	1	LOC_Os05g18294
LOC_Os12g24320	1	osa-miRf10223-akr				osa-miRf12028-akr	1	LOC_Os08g13430
LOC_Os12g25690	1	osa-miRf11402-akr				osa-miRf12030-akr	1	LOC_Os02g46720
LOC_Os12g26030	1	osa-miRf11026-akr				osa-miRf12033-akr	1	LOC_Os04g38970
LOC_Os12g32660	1	osa-miRf10374-akr				osa-miRf12034-akr	1	LOC_Os07g25700
LOC_Os12g32920	1	osa-miRf12007-akr				osa-miRf12035-akr	1	LOC_Os06g35700
LOC_Os12g34320	1	osa-miRf10781-akr				osa-miRf12036-akr	1	LOC_Os06g06080
LOC_Os12g35340	1	osa-miRf11738-akr				osa-miRf12041-akr	1	LOC_Os08g13430
LOC_Os12g36110	1	osa-miRf11553-akr				osa-miRf12043-akr	1	LOC_Os06g51110
LOC_Os12g37530	1	osa-miRf10301-akr				osa-miRf12045-akr	1	LOC_Os05g18294
LOC_Os12g37690	1	osa-miRf10273-akr				osa-miRf12046-akr	1	LOC_Os05g43880
LOC_Os12g37840	1	osa-miRf11390-akr				osa-miRf12049-akr	1	LOC_Os05g41200
LOC_Os12g37980	1	osa-miR414				osa-miRf12050-akr	1	LOC_Os05g15330
LOC_Os12g38730	1	osa-miR414				osa-miRf12051-akr	1	LOC_Os05g43880
LOC_Os12g38770	1	osa-miRf11909-akr				osa-miRf12052-akr	1	LOC_Os05g43880
LOC_Os12g39310	1	osa-miRf11341-akr				osa-miRf12058-akr	1	LOC_Os04g48760
LOC_Os12g39320	1	osa-miRf11051-akr				osa-miRf12062-akr	1	LOC_Os11g25780
LOC_Os12g40480	1	osa-miR395f				osa-miRf12072-akr	1	LOC_Os08g13430
LOC_Os12g42280	1	osa-miR415				osa-miRf12074-akr	1	LOC_Os09g35630
LOC_Os12g43110	1	osa-miRf12023-akr				osa-miRf12075-akr	1	LOC_Os01g33800
LOC_Os12g43140	1	osa-miRf10063-akr				osa-miRf12076-akr	1	LOC_Os11g41034
LOC_Os12g43550	1	osa-miRf11090-akr				osa-miRf12088-akr	1	LOC_Os01g49820
LOC_Os12g43660	1	osa-miRf10632-akr				osa-miRf12089-akr	1	LOC_Os07g25700
LOC_Os12g44100	1	osa-miRf12002-akr				osa-miRf12093-akr	1	LOC_Os11g25780
LOC_Os12g44230	1	osa-miRf11530-akr				osa-miRf12098-akr	1	LOC_Os08g13430
LOC_Os12g44270	1	osa-miRf12002-akr				osa-miRf12100-akr	1	LOC_Os03g50470
						osa-miRf12101-akr	1	LOC_Os08g13430
						osa-miRf12102-akr	1	LOC_Os08g13430
						osa-miRf12103-akr	1	LOC_Os05g04820
