# Supplementary material for: Bioinformatic Analysis of Epigenetic and MicroRNA Mediated Regulation of Drought Responsive Genes in Rice
Source: PLoS One. 2012 Nov 8;7(11):e49331. doi: 10.1371/journal.pone.0049331 (PMC3493535; doi:10.1371/journal.pone.0049331)
Supplement: Table S3 — List of 73 GO terms enriched only in one of the nine clusters. (XLSX) [file pone.0049331.s005.xlsx]

## Sheet: Table-S3
Table S3. List of 73 GO terms enriched only in one of the nine clusters
Cluster	GO term	Ontology	Description	Number in input list	Number in BG/Ref	p-value	FDR
D	GO:0016209	F	antioxidant activity	50	219	0.00018	0.0075
D	GO:0009056	P	catabolic process	85	438	0.00063	0.016
D	GO:0005618	C	cell wall	23	82	0.00051	0.023
D	GO:0006081	P	cellular aldehyde metabolic process	5	8	0.0019	0.039
D	GO:0006534	P	cysteine metabolic process	9	17	0.00015	0.0047
D	GO:0004124	F	cysteine synthase activity	6	10	0.00085	0.025
D	GO:0051213	F	dioxygenase activity	11	24	0.00014	0.0068
D	GO:0008299	P	isoprenoid biosynthetic process	13	41	0.0025	0.049
D	GO:0006720	P	isoprenoid metabolic process	13	41	0.0025	0.049
D	GO:0016879	F	ligase activity, forming carbon-nitrogen bonds	49	225	0.00066	0.022
D	GO:0009057	P	macromolecule catabolic process	64	312	0.00063	0.016
D	GO:0016684	F	oxidoreductase activity, acting on peroxide as acceptor	47	201	0.00016	0.007
D	GO:0004601	F	peroxidase activity	47	201	0.00016	0.007
D	GO:0019904	F	protein domain specific binding	5	8	0.0019	0.045
D	GO:0009607	P	response to biotic stimulus	9	18	0.00026	0.0076
D	GO:0033897	F	ribonuclease T2 activity	6	8	0.00014	0.0068
D	GO:0000097	P	sulfur amino acid biosynthetic process	11	27	0.0005	0.013
D	GO:0000096	P	sulfur amino acid metabolic process	12	29	0.00023	0.007
D	GO:0006790	P	sulfur metabolic process	18	63	0.0016	0.034
D	GO:0016757	F	transferase activity, transferring glycosyl groups	103	547	0.00057	0.02
D	GO:0008135	F	translation factor activity, nucleic acid binding	21	77	0.0013	0.034
D	GO:0019842	F	vitamin binding	47	217	0.00094	0.026
D	GO:0016762	F	xyloglucan:xyloglucosyl transferase activity	11	30	0.0014	0.036
DD	GO:0005829	C	cytosol	8	33	0.0032	0.041
DD	GO:0044445	C	cytosolic part	8	33	0.0032	0.041
DD	GO:0018130	P	heterocycle biosynthetic process	15	81	0.0014	0.033
DD	GO:0044424	C	intracellular part	349	3831	0.003	0.041
DD	GO:0019684	P	photosynthesis, light reaction	10	45	0.0021	0.046
DD	GO:0019953	P	sexual reproduction	7	24	0.0018	0.041
DU	GO:0003995	F	acyl-CoA dehydrogenase activity	5	12	0.0004	0.022
DU	GO:0009288	C	bacterial-type flagellum	5	8	3.5e-05	0.0017
DU	GO:0042995	C	cell projection	5	8	3.5e-05	0.0017
DU	GO:0046351	P	disaccharide biosynthetic process	7	31	0.0019	0.042
DU	GO:0005984	P	disaccharide metabolic process	9	44	0.00095	0.024
DU	GO:0019861	C	flagellum	5	8	3.5e-05	0.0017
DU	GO:0016138	P	glycoside biosynthetic process	7	31	0.0019	0.042
DU	GO:0016137	P	glycoside metabolic process	9	44	0.00095	0.024
DU	GO:0040011	P	locomotion	5	10	0.00014	0.005
DU	GO:0033865	P	nucleoside bisphosphate metabolic process	6	18	0.00043	0.012
DU	GO:0009312	P	oligosaccharide biosynthetic process	7	32	0.0023	0.049
DU	GO:0009311	P	oligosaccharide metabolic process	9	46	0.0013	0.032
DU	GO:0042278	P	purine nucleoside metabolic process	6	22	0.0014	0.033
DU	GO:0046128	P	purine ribonucleoside metabolic process	6	22	0.0014	0.033
DU	GO:0005992	P	trehalose biosynthetic process	7	28	0.001	0.025
DU	GO:0005991	P	trehalose metabolic process	8	29	0.00021	0.0063
E	GO:0016160	F	amylase activity	7	17	0.00046	0.015
E	GO:0048046	C	apoplast	19	94	0.00081	0.021
E	GO:0016161	F	beta-amylase activity	5	10	0.0011	0.032
E	GO:0009084	P	glutamine family amino acid biosynthetic process	7	21	0.002	0.045
E	GO:0006544	P	glycine metabolic process	6	13	0.00058	0.014
E	GO:0016165	F	lipoxygenase activity	6	14	0.00093	0.028
E	GO:0016310	P	phosphorylation	206	1761	0.00033	0.009
ED	GO:0015297	F	antiporter activity	13	98	0.0019	0.049
ED	GO:0004180	F	carboxypeptidase activity	12	86	0.0018	0.048
ED	GO:0015893	P	drug transport	10	66	0.0023	0.048
ED	GO:0006760	P	folic acid and derivative metabolic process	5	16	0.0011	0.027
ED	GO:0034660	P	ncRNA metabolic process	20	186	0.0021	0.045
ED	GO:0042493	P	response to drug	10	66	0.0023	0.048
ED	GO:0004185	F	serine-type carboxypeptidase activity	10	63	0.0016	0.044
ED	GO:0070008	F	serine-type exopeptidase activity	10	63	0.0016	0.044
NE	GO:0006022	P	aminoglycan metabolic process	6	29	0.0017	0.044
NE	GO:0071554	P	cell wall organization or biogenesis	16	146	0.0011	0.035
NE	GO:0016044	P	cellular membrane organization	7	33	0.00061	0.023
NE	GO:0016226	P	iron-sulfur cluster assembly	5	13	0.00018	0.008
NE	GO:0061024	P	membrane organization	7	35	0.00088	0.03
NE	GO:0031163	P	metallo-sulfur cluster assembly	5	13	0.00018	0.008
NED	GO:0005789	C	endoplasmic reticulum membrane	5	41	0.0037	0.032
NED	GO:0044432	C	endoplasmic reticulum part	5	43	0.0046	0.036
NED	GO:0042175	C	nuclear envelope-endoplasmic reticulum network	5	41	0.0037	0.032
NED	GO:0005840	C	ribosome	29	456	1.1e-05	0.00016
NED	GO:0003735	F	structural constituent of ribosome	29	455	1e-05	0.0032
NED	GO:0071212	C	subsynaptic reticulum	5	43	0.0046	0.036
NEU	GO:0016998	P	cell wall macromolecule catabolic process	5	45	0.0021	0.046
