# Supplementary material for: Bioinformatic Analysis of Epigenetic and MicroRNA Mediated Regulation of Drought Responsive Genes in Rice
Source: PLoS One. 2012 Nov 8;7(11):e49331. doi: 10.1371/journal.pone.0049331 (PMC3493535; doi:10.1371/journal.pone.0049331)
Supplement: Table S4 — Unique and overlapping GO terms in clusters NED, NEU, ED and EU. (XLSX) [file pone.0049331.s006.xlsx]

## Sheet: Table-S4
Table S4. Unique and overlapping GO terms in clusters NED, NEU, ED and EU
	BP				MF				CC
Unique
NED	GO term	Description	p-value	NED	GO term	Description	p-value	NED	GO term	Description	p-value
	GO:0015979	photosynthesis	1.1e-11		GO:0005198	structural molecule activity	1.8e-06		GO:0044444	cytoplasmic part	3.4e-06
	GO:0009765	photosynthesis light harvesting	6.9e-05		GO:0003735	structural constituent of ribosome	1e-05		GO:0009579	thylakoid	1.2e-05
	GO:0006412	translation	6e-05						GO:0009521	photosystem	1.2e-05
	GO:0006811	ion transport	0.00032						GO:0034357	photosynthetic membrane	3.8e-05
	GO:0006457	protein folding	0.0004						GO:0030529	ribonucleoprotein complex	3.8e-05
	GO:0006979	response to oxidative stress	0.00052						GO:0005840	ribosome	0.00016
	GO:0051188	cofactor biosynthetic process	0.00059						GO:0009522	photosystem I	0.00016
									GO:0044436	thylakoid part	0.00016
									GO:0005783	endoplasmic reticulum	0.0003
									GO:0009523	photosystem II	0.012
									GO:0042175	nuclear envelope-endoplasmic reticulum network	0.032
									GO:0005789	endoplasmic reticulum membrane	0.032
									GO:0044432	endoplasmic reticulum part	0.036
									GO:0071212	subsynaptic reticulum	0.036
NEU	GO term	Description	p-value	NEU	GO term	Description	p-value	NEU	GO term	Description	p-value
	GO:0006355	regulation of transcription, DNA-dependent	2.1e-07		GO:0016835	carbon-oxygen lyase activity	0.00037
	GO:0051252	regulation of RNA metabolic process	2.3e-07
	GO:0006351	transcription, DNA-dependent	9.1e-07
	GO:0032774	RNA biosynthetic process	9.6e-07
	GO:0009072	aromatic amino acid family metabolic process	1.7e-05
	GO:0010467	gene expression	8.2e-05
	GO:0006576	cellular biogenic amine metabolic process	0.0017
	GO:0016998	cell wall macromolecule catabolic process	0.0021
EU	GO term	Description	p-value	EU	GO term	Description	p-value	EU	GO term	Description	p-value
	GO:0006464	protein modification process	1.6e-06		GO:0004722	protein serine/threonine phosphatase activity	8e-08		GO:0008287	protein serine/threonine phosphatase complex	1.3e-07
	GO:0043687	post-translational protein modification	2.5e-06		GO:0042578	phosphoric ester hydrolase activity	4.5e-05
	GO:0006970	response to osmotic stress	2.7e-06		GO:0016773	phosphotransferase activity, alcohol group as acceptor	5.8e-05
	GO:0016311	dephosphorylation	4.3e-06		GO:0016857	racemase and epimerase activity, acting on carbohydrates and derivatives	5.8e-05
	GO:0043412	macromolecule modification	4.9e-06		GO:0016830	carbon-carbon lyase activity	0.0001
	GO:0006470	protein amino acid dephosphorylation	7.9e-06		GO:0004721	phosphoprotein phosphatase activity	0.00011
	GO:0007165	signal transduction	2.7e-05		GO:0005509	calcium ion binding	0.00014
	GO:0023060	signal transmission	3.1e-05		GO:0016791	phosphatase activity	0.00016
	GO:0023046	signaling process	3.1e-05		GO:0004674	protein serine/threonine kinase activity	0.00017
	GO:0006796	phosphate metabolic process	3.7e-05
	GO:0006793	phosphorus metabolic process	3.7e-05
	GO:0009116	nucleoside metabolic process	0.00013
ED	GO term	Description	p-value	ED	GO term	Description	p-value	ED	GO term	Description	p-value
	GO:0034621	cellular macromolecular complex subunit organization	9.9e-13		GO:0000166	nucleotide binding	1e-06		GO:0000786	nucleosome	3.8e-07
	GO:0044085	cellular component biogenesis	4.3e-12		GO:0017076	purine nucleotide binding	3.2e-06		GO:0032993	protein-DNA complex	4.7e-07
	GO:0043933	macromolecular complex subunit organization	1.5e-11		GO:0032555	purine ribonucleotide binding	6.1e-06		GO:0015630	microtubule cytoskeleton	0.00014
	GO:0034622	cellular macromolecular complex assembly	5.3e-11		GO:0032553	ribonucleotide binding	6.1e-06		GO:0005856	cytoskeleton	0.00016
	GO:0065003	macromolecular complex assembly	5.8e-10		GO:0005215	transporter activity	9.4e-06		GO:0044430	cytoskeletal part	0.00027
	GO:0022607	cellular component assembly	7.7e-10		GO:0016829	lyase activity	1.1e-05		GO:0005874	microtubule	0.0005
	GO:0071103	DNA conformation change	5.9e-08		GO:0001883	purine nucleoside binding	5e-05
	GO:0034728	nucleosome organization	1e-07		GO:0001882	nucleoside binding	4.5e-05
	GO:0065004	protein-DNA complex assembly	1e-07		GO:0030554	adenyl nucleotide binding	5e-05
	GO:0031497	chromatin assembly	1e-07		GO:0046527	glucosyltransferase activity	5.8e-05
	GO:0006334	nucleosome assembly	1e-07		GO:0003924	GTPase activity	7.4e-05
	GO:0006323	DNA packaging	1.3e-07		GO:0016818	hydrolase activity, acting on acid anhydrides, in phosphorus-containing anhydrides	7.9e-05
	GO:0044262	cellular carbohydrate metabolic process	2e-07		GO:0016462	pyrophosphatase activity	8.4e-05
	GO:0051258	protein polymerization	6.1e-06		GO:0032559	adenyl ribonucleotide binding	0.0001
	GO:0019318	hexose metabolic process	2.7e-05		GO:0005524	ATP binding	9.9e-05
	GO:0043623	cellular protein complex assembly	3e-05		GO:0016817	hydrolase activity, acting on acid anhydrides	0.00021
	GO:0007018	microtubule-based movement	2.9e-05		GO:0035251	UDP-glucosyltransferase activity	0.00023
	GO:0005996	monosaccharide metabolic process	5e-05		GO:0016853	isomerase activity	0.00027
	GO:0034641	cellular nitrogen compound metabolic process	6.7e-05		GO:0032561	guanyl ribonucleotide binding	0.00036
	GO:0044264	cellular polysaccharide metabolic process	6.9e-05		GO:0005525	GTP binding	0.00036
	GO:0042254	ribosome biogenesis	8.4e-05		GO:0008194	UDP-glycosyltransferase activity	0.00037
	GO:0007017	microtubule-based process	9.4e-05		GO:0016564	transcription repressor activity	0.00043
	GO:0006073	cellular glucan metabolic process	0.00013		GO:0019001	guanyl nucleotide binding	0.00048
	GO:0032787	monocarboxylic acid metabolic process	0.00012		GO:0000287	magnesium ion binding	0.00052
	GO:0070271	protein complex biogenesis	0.00013		GO:0016491	oxidoreductase activity	0.00051
	GO:0022613	ribonucleoprotein complex biogenesis	0.00012		GO:0017111	nucleoside-triphosphatase activity	0.0006
	GO:0044042	glucan metabolic process	0.00013		GO:0016759	cellulose synthase activity	0.00096
	GO:0006461	protein complex assembly	0.00013		GO:0016760	cellulose synthase (UDP-forming) activity	0.00096
	GO:0006006	glucose metabolic process	0.00027		GO:0022857	transmembrane transporter activity	0.0013
	GO:0006519	cellular amino acid and derivative metabolic process	0.00031		GO:0004185	serine-type carboxypeptidase activity	0.0016
	GO:0055114	oxidation reduction	0.00033		GO:0070008	serine-type exopeptidase activity	0.0016
	GO:0009396	folic acid and derivative biosynthetic process	0.00036		GO:0004180	carboxypeptidase activity	0.0018
	GO:0006520	cellular amino acid metabolic process	0.00043		GO:0016615	malate dehydrogenase activity	0.0019
	GO:0009069	serine family amino acid metabolic process	0.00047		GO:0015297	antiporter activity	0.0019
	GO:0006541	glutamine metabolic process	0.00054
	GO:0044106	cellular amine metabolic process	0.0006
	GO:0044271	cellular nitrogen compound biosynthetic process	0.00062
	GO:0016052	carbohydrate catabolic process	0.00079
	GO:0006808	regulation of nitrogen utilization	0.00076
	GO:0019740	nitrogen utilization	0.00076
	GO:0006760	folic acid and derivative metabolic process	0.0011
	GO:0033692	cellular polysaccharide biosynthetic process	0.001
	GO:0008610	lipid biosynthetic process	0.0011
	GO:0044282	small molecule catabolic process	0.0015
	GO:0000271	polysaccharide biosynthetic process	0.0015
	GO:0046164	alcohol catabolic process	0.0019
	GO:0006261	DNA-dependent DNA replication	0.0019
	GO:0044275	cellular carbohydrate catabolic process	0.0019
	GO:0006108	malate metabolic process	0.0019
	GO:0009250	glucan biosynthetic process	0.002
	GO:0030243	cellulose metabolic process	0.002
	GO:0030244	cellulose biosynthetic process	0.002
	GO:0034660	ncRNA metabolic process	0.0021
	GO:0044267	cellular protein metabolic process	0.0023
	GO:0042493	response to drug	0.0023
	GO:0015893	drug transport	0.0023
Common (NED and ED)
	GO term	Description	Avg. p-value		GO term	Description	Avg. p-value		GO term	Description	Avg. p-value
	GO:0044283	small molecule biosynthetic process	0.00011						GO:0032991	macromolecular complex	0.00280908
	GO:0016053	organic acid biosynthetic process	0.0004						GO:0005737	cytoplasm	0.00415917
	GO:0046394	carboxylic acid biosynthetic process	0.00069						GO:0044425	membrane part	0.00416152
	GO:0006810	transport	0.00081355						GO:0016020	membrane	0.00416317
	GO:0051234	establishment of localization	0.0009371						GO:0044464	cell part	0.00417769
	GO:0051179	localization	0.0010431						GO:0005623	cell	0.00419221
	GO:0043436	oxoacid metabolic process	0.0012932						GO:0043234	protein complex	0.00442221
	GO:0006629	lipid metabolic process	0.0015692						GO:0031224	intrinsic to membrane	0.00474755
	GO:0006082	organic acid metabolic process	0.00182431						GO:0016021	integral to membrane	0.00609801
	GO:0019752	carboxylic acid metabolic process	0.00207441						GO:0005622	intracellular	0.00994801
	GO:0042180	cellular ketone metabolic process	0.00236956
	GO:0006066	alcohol metabolic process	0.00277956
Common (NEU and EU)
	GO term	Description	Avg. p-value		GO term	Description	Avg. p-value		GO term	Description	Avg. p-value
	GO:0045449	regulation of transcription	1.7e-06		GO:0030528	transcription regulator activity	0.000747202
	GO:0019219	regulation of nucleobase, nucleoside, nucleotide and nucleic acid metabolic process	3.70001e-06		GO:0003700	transcription factor activity	0.000751081
	GO:0051171	regulation of nitrogen compound metabolic process	5.70002e-06		GO:0043565	sequence-specific DNA binding	0.000841581
	GO:0080090	regulation of primary metabolic process	1.27e-05
	GO:0009889	regulation of biosynthetic process	1.555e-05
	GO:0010556	regulation of macromolecule biosynthetic process	1.84001e-05
	GO:0031326	regulation of cellular biosynthetic process	2.12501e-05
	GO:0060255	regulation of macromolecule metabolic process	3.32501e-05
	GO:0031323	regulation of cellular metabolic process	3.44001e-05
	GO:0010468	regulation of gene expression	3.92502e-05
	GO:0019222	regulation of metabolic process	4.38502e-05
	GO:0006350	transcription	6.28504e-05
	GO:0009415	response to water	9.30004e-05
	GO:0009628	response to abiotic stimulus	0.0007446
Common (NEU and ED)
	GO term	Description	Avg. p-value		GO term	Description	Avg. p-value		GO term	Description	Avg. p-value
	GO:0009308	amine metabolic process	0.00047
	GO:0016070	RNA metabolic process	0.0007
	GO:0005976	polysaccharide metabolic process	0.001875
Common (EU and ED)
	GO term	Description	Avg. p-value		GO term	Description	Avg. p-value		GO term	Description	Avg. p-value
					GO:0048037	cofactor binding	1.1532e-05
					GO:0050662	coenzyme binding	8.7332e-05
					GO:0016301	kinase activity	0.000614832
Common (NEU, EU and ED)
	GO term	Description	Avg. p-value		GO term	Description	Avg. p-value		GO term	Description	Avg. p-value
	GO:0050789	regulation of biological process	0.00011009		GO:0016798	hydrolase activity, acting on glycosyl bonds	0.00131531
	GO:0065007	biological regulation	0.0003703		GO:0004553	hydrolase activity, hydrolyzing O-glycosyl compounds	0.00134981
	GO:0050794	regulation of cellular process	0.00127031
Common (NED, EU and ED)
	GO term	Description	Avg. p-value		GO term	Description	Avg. p-value		GO term	Description	Avg. p-value
	GO:0044281	small molecule metabolic process	2.26545e-05
Common (NED, NEU, EU and ED)
	GO term	Description	Avg. p-value		GO term	Description	Avg. p-value		GO term	Description	Avg. p-value
	GO:0005975	carbohydrate metabolic process	5.55072e-05
