# Supplementary material for: Bioinformatic Analysis of Epigenetic and MicroRNA Mediated Regulation of Drought Responsive Genes in Rice
Source: PLoS One. 2012 Nov 8;7(11):e49331. doi: 10.1371/journal.pone.0049331 (PMC3493535; doi:10.1371/journal.pone.0049331)
Supplement: Table S5 — List of protein-protein interactions (PPIs) shown by DRGs in cluster EU. (XLSX) [file pone.0049331.s007.xlsx]

## Sheet: Table-S5
Table S5. List of protein-protein interactions (PPIs) shown by DRGs in cluster EU
node1	gene name	node2	gene name	combined_score (String-DB)
LOC_Os04g38950.1	class I glutamine amidotransferase, putative, expressed	LOC_Os03g03450.1	anthranilate phosphoribosyltransferase, chloroplast precursor, putative, expressed	0.999
LOC_Os03g61120.1	anthranilate synthase component I-1, chloroplast precursor, putative, expressed	LOC_Os03g03450.1	anthranilate phosphoribosyltransferase, chloroplast precursor, putative, expressed	0.996
LOC_Os12g08260.2	dehydrogenase E1 component domain containing protein, expressed	LOC_Os07g07470.1	transketolase, putative, expressed	0.996
LOC_Os03g15780.1	anthranilate synthase component I-1, chloroplast precursor, putative, expressed	LOC_Os03g03450.1	anthranilate phosphoribosyltransferase, chloroplast precursor, putative, expressed	0.995
LOC_Os09g08130.1	indole-3-glycerol phosphate synthase, chloroplast precursor, putative, expressed	LOC_Os07g08430.1	indole-3-glycerol phosphate lyase, chloroplast precursor, putative, expressed	0.979
LOC_Os03g04410.1	aconitate hydratase protein, putative, expressed	LOC_Os02g13840.1	citrate synthase, putative, expressed	0.977
LOC_Os04g38950.1	class I glutamine amidotransferase, putative, expressed	LOC_Os03g61120.1	anthranilate synthase component I-1, chloroplast precursor, putative, expressed	0.975
LOC_Os04g38950.1	class I glutamine amidotransferase, putative, expressed	LOC_Os03g15780.1	anthranilate synthase component I-1, chloroplast precursor, putative, expressed	0.967
LOC_Os10g25030.1	red chlorophyll catabolite reductase, putative, expressed	LOC_Os03g05310.1	pheophorbide a oxygenase, chloroplast precursor, putative, expressed	0.96
LOC_Os09g08130.1	indole-3-glycerol phosphate synthase, chloroplast precursor, putative, expressed	LOC_Os03g03450.1	anthranilate phosphoribosyltransferase, chloroplast precursor, putative, expressed	0.957
LOC_Os06g51084.1	1,4-alpha-glucan-branching enzyme, chloroplast precursor, putative, expressed	LOC_Os06g06560.1	starch synthase, putative, expressed	0.955
LOC_Os06g13720.1	dehydrogenase E1 component domain containing protein, expressed	LOC_Os06g01630.5	2-oxo acid dehydrogenases acyltransferase domain containing protein, expressed	0.954
LOC_Os06g12150.1	shikimate kinase, putative, expressed	LOC_Os06g04280.1	3-phosphoshikimate 1-carboxyvinyltransferase, chloroplast precursor, putative, expressed	0.953
LOC_Os08g40180.1	3-hydroxy-3-methylglutaryl-coenzyme A reductase, putative, expressed	LOC_Os03g02710.1	hydroxymethylglutaryl-CoA synthase, putative, expressed	0.943
LOC_Os07g34520.1	isocitrate lyase, putative, expressed	LOC_Os03g04410.1	aconitate hydratase protein, putative, expressed	0.94
LOC_Os03g04410.1	aconitate hydratase protein, putative, expressed	LOC_Os02g10070.2	citrate synthase, putative, expressed	0.939
LOC_Os04g40310.1	dehydrogenase, putative, expressed	LOC_Os03g04410.1	aconitate hydratase protein, putative, expressed	0.935
LOC_Os03g31550.1	aldehyde oxidase, putative, expressed	LOC_Os01g64520.1	uricase, putative, expressed	0.931
LOC_Os07g08430.1	indole-3-glycerol phosphate lyase, chloroplast precursor, putative, expressed	LOC_Os03g03450.1	anthranilate phosphoribosyltransferase, chloroplast precursor, putative, expressed	0.93
LOC_Os05g36270.1	fructose-1,6-bisphosphatase, putative, expressed	LOC_Os04g19740.1	transketolase, chloroplast precursor, putative, expressed	0.93
LOC_Os05g38150.2	amino acid kinase, putative, expressed	LOC_Os01g62900.1	amino acid kinase, putative, expressed	0.928
LOC_Os12g26290.2	alpha-DOX2, putative, expressed	LOC_Os03g49380.1	lipoxygenase, putative, expressed	0.924
LOC_Os03g02710.1	hydroxymethylglutaryl-CoA synthase, putative, expressed	LOC_Os01g02020.1	acetyl-CoA acetyltransferase, cytosolic, putative, expressed	0.917
LOC_Os02g13840.1	citrate synthase, putative, expressed	LOC_Os01g46070.1	lactate/malate dehydrogenase, putative, expressed	0.914
LOC_Os02g10070.2	citrate synthase, putative, expressed	LOC_Os01g46070.1	lactate/malate dehydrogenase, putative, expressed	0.912
LOC_Os05g51670.1	NAD dependent epimerase/dehydratase family protein, putative, expressed	LOC_Os03g17000.1	NAD dependent epimerase/dehydratase family domain containing protein, expressed	0.912
LOC_Os05g45710.1	serine acetyltransferase protein, putative, expressed	LOC_Os01g74650.1	cysteine synthase, mitochondrial precursor, putative, expressed	0.91
LOC_Os09g15420.1	NAD dependent epimerase/dehydratase family protein, putative, expressed	LOC_Os03g17000.1	NAD dependent epimerase/dehydratase family domain containing protein, expressed	0.91
LOC_Os06g01630.5	2-oxo acid dehydrogenases acyltransferase domain containing protein, expressed	LOC_Os02g13840.1	citrate synthase, putative, expressed	0.905
LOC_Os06g01630.5	2-oxo acid dehydrogenases acyltransferase domain containing protein, expressed	LOC_Os02g10070.2	citrate synthase, putative, expressed	0.904
LOC_Os04g45970.1	glutamate dehydrogenase protein, putative, expressed	LOC_Os03g18130.1	asparagine synthetase, putative, expressed	0.903
LOC_Os04g45970.1	glutamate dehydrogenase protein, putative, expressed	LOC_Os01g48960.1	glutamate synthase, chloroplast precursor, putative, expressed	0.902
LOC_Os04g56210.1	polyprenyl synthetase, putative, expressed	LOC_Os01g50050.1	polyprenyl synthetase, putative, expressed	0.902
LOC_Os09g23350.1	trehalose synthase, putative, expressed	LOC_Os01g53000.1	trehalose synthase, putative, expressed	0.902
LOC_Os01g16350.1	hydroxymethylglutaryl-CoA lyase, putative, expressed	LOC_Os01g02020.1	acetyl-CoA acetyltransferase, cytosolic, putative, expressed	0.901
LOC_Os05g09440.1	NADP-dependent malic enzyme, chloroplast precursor, putative, expressed	LOC_Os01g46070.1	lactate/malate dehydrogenase, putative, expressed	0.901
LOC_Os05g38150.2	amino acid kinase, putative, expressed	LOC_Os04g45970.1	glutamate dehydrogenase protein, putative, expressed	0.901
LOC_Os11g39220.1	acyl-coenzyme A oxidase, putative, expressed	LOC_Os05g07090.1	acyl-coenzyme A dehydrogenase, mitochondrial precursor, putative, expressed	0.901
LOC_Os01g46070.1	lactate/malate dehydrogenase, putative, expressed	LOC_Os01g09320.1	NADP-dependent malic enzyme, chloroplast precursor, putative, expressed	0.9
LOC_Os01g54030.1	NADP-dependent malic enzyme, putative, expressed	LOC_Os01g46070.1	lactate/malate dehydrogenase, putative, expressed	0.9
LOC_Os04g45970.1	glutamate dehydrogenase protein, putative, expressed	LOC_Os01g62900.1	amino acid kinase, putative, expressed	0.9
LOC_Os11g39220.1	acyl-coenzyme A oxidase, putative, expressed	LOC_Os02g17390.1	3-hydroxyacyl-CoA dehydrogenase, putative, expressed	0.9
LOC_Os06g24704.1	acyl-coenzyme A oxidase, putative, expressed	LOC_Os02g17390.1	3-hydroxyacyl-CoA dehydrogenase, putative, expressed	0.9
LOC_Os06g24704.1	acyl-coenzyme A oxidase, putative, expressed	LOC_Os05g07090.1	acyl-coenzyme A dehydrogenase, mitochondrial precursor, putative, expressed	0.9
LOC_Os08g02700.1	fructose-bisphospate aldolase isozyme, putative, expressed	LOC_Os05g36270.1	fructose-1,6-bisphosphatase, putative, expressed	0.9
LOC_Os11g39220.1	acyl-coenzyme A oxidase, putative, expressed	LOC_Os01g02020.1	acetyl-CoA acetyltransferase, cytosolic, putative, expressed	0.899
LOC_Os06g01630.5	2-oxo acid dehydrogenases acyltransferase domain containing protein, expressed	LOC_Os01g02020.1	acetyl-CoA acetyltransferase, cytosolic, putative, expressed	0.899
LOC_Os06g24704.1	acyl-coenzyme A oxidase, putative, expressed	LOC_Os01g02020.1	acetyl-CoA acetyltransferase, cytosolic, putative, expressed	0.899
LOC_Os01g09570.1	6-phosphofructokinase, putative, expressed	LOC_Os01g03710.1	mannose-6-phosphate isomerase, putative, expressed	0.899
LOC_Os05g36270.1	fructose-1,6-bisphosphatase, putative, expressed	LOC_Os01g03710.1	mannose-6-phosphate isomerase, putative, expressed	0.899
LOC_Os06g13720.1	dehydrogenase E1 component domain containing protein, expressed	LOC_Os01g09320.1	NADP-dependent malic enzyme, chloroplast precursor, putative, expressed	0.899
LOC_Os04g19740.1	transketolase, chloroplast precursor, putative, expressed	LOC_Os01g09570.1	6-phosphofructokinase, putative, expressed	0.899
LOC_Os05g36270.1	fructose-1,6-bisphosphatase, putative, expressed	LOC_Os01g09570.1	6-phosphofructokinase, putative, expressed	0.899
LOC_Os08g02700.1	fructose-bisphospate aldolase isozyme, putative, expressed	LOC_Os01g09570.1	6-phosphofructokinase, putative, expressed	0.899
LOC_Os03g02710.1	hydroxymethylglutaryl-CoA synthase, putative, expressed	LOC_Os01g16350.1	hydroxymethylglutaryl-CoA lyase, putative, expressed	0.899
LOC_Os02g33110.1	glycosyl hydrolases, putative, expressed	LOC_Os01g32364.1	Os1bglu1 - beta-mannosidase/glucosidase homologue, expressed	0.899
LOC_Os08g36320.1	decarboxylase, putative, expressed	LOC_Os01g48960.1	glutamate synthase, chloroplast precursor, putative, expressed	0.899
LOC_Os03g13300.1	glutamate decarboxylase, putative, expressed	LOC_Os01g48960.1	glutamate synthase, chloroplast precursor, putative, expressed	0.899
LOC_Os03g10080.1	expressed protein	LOC_Os01g50050.1	polyprenyl synthetase, putative, expressed	0.899
LOC_Os03g22120.1	sucrose synthase, putative, expressed	LOC_Os01g53000.1	trehalose synthase, putative, expressed	0.899
LOC_Os06g13720.1	dehydrogenase E1 component domain containing protein, expressed	LOC_Os01g54030.1	NADP-dependent malic enzyme, putative, expressed	0.899
LOC_Os07g08430.1	indole-3-glycerol phosphate lyase, chloroplast precursor, putative, expressed	LOC_Os01g65410.1	serine hydroxymethyltransferase, mitochondrial precursor, putative, expressed	0.899
LOC_Os06g40180.1	phospholipase D, putative, expressed	LOC_Os01g72520.1	phosphoesterase family protein, putative, expressed	0.899
LOC_Os05g29050.2	phospholipase D p1, putative, expressed	LOC_Os01g72520.1	phosphoesterase family protein, putative, expressed	0.899
LOC_Os06g49790.1	acyltransferase, putative, expressed	LOC_Os01g72520.1	phosphoesterase family protein, putative, expressed	0.899
LOC_Os06g40170.1	phospholipase D, putative, expressed	LOC_Os01g72520.1	phosphoesterase family protein, putative, expressed	0.899
LOC_Os10g37340.1	cystathionine gamma-synthase, putative, expressed	LOC_Os02g19924.1	aminotransferase, classes I and II, domain containing protein, expressed	0.899
LOC_Os03g22120.1	sucrose synthase, putative, expressed	LOC_Os02g33110.1	glycosyl hydrolases, putative, expressed	0.899
LOC_Os07g48160.1	alpha-galactosidase precursor, putative, expressed	LOC_Os02g33110.1	glycosyl hydrolases, putative, expressed	0.899
LOC_Os06g13720.1	dehydrogenase E1 component domain containing protein, expressed	LOC_Os02g39570.1	ACT domain containing protein, expressed	0.899
LOC_Os04g56210.1	polyprenyl synthetase, putative, expressed	LOC_Os03g10080.1	expressed protein	0.899
LOC_Os09g26880.1	aldehyde dehydrogenase, putative, expressed	LOC_Os03g13300.1	glutamate decarboxylase, putative, expressed	0.899
LOC_Os04g45970.1	glutamate dehydrogenase protein, putative, expressed	LOC_Os03g13300.1	glutamate decarboxylase, putative, expressed	0.899
LOC_Os11g08300.1	aldehyde dehydrogenase, putative, expressed	LOC_Os03g13300.1	glutamate decarboxylase, putative, expressed	0.899
LOC_Os09g23350.1	trehalose synthase, putative, expressed	LOC_Os03g22120.1	sucrose synthase, putative, expressed	0.899
LOC_Os07g48160.1	alpha-galactosidase precursor, putative, expressed	LOC_Os03g61710.1	GHMP kinases ATP-binding protein, putative, expressed	0.899
LOC_Os08g02700.1	fructose-bisphospate aldolase isozyme, putative, expressed	LOC_Os04g19740.1	transketolase, chloroplast precursor, putative, expressed	0.899
LOC_Os09g26880.1	aldehyde dehydrogenase, putative, expressed	LOC_Os04g40040.1	copper methylamine oxidase precursor, putative, expressed	0.899
LOC_Os11g08300.1	aldehyde dehydrogenase, putative, expressed	LOC_Os04g40040.1	copper methylamine oxidase precursor, putative, expressed	0.899
LOC_Os08g36320.1	decarboxylase, putative, expressed	LOC_Os04g45970.1	glutamate dehydrogenase protein, putative, expressed	0.899
LOC_Os06g13720.1	dehydrogenase E1 component domain containing protein, expressed	LOC_Os05g09440.1	NADP-dependent malic enzyme, chloroplast precursor, putative, expressed	0.899
LOC_Os05g42270.1	acyltransferase, putative, expressed	LOC_Os05g29050.2	phospholipase D p1, putative, expressed	0.899
LOC_Os06g49790.1	acyltransferase, putative, expressed	LOC_Os05g29050.2	phospholipase D p1, putative, expressed	0.899
LOC_Os07g08430.1	indole-3-glycerol phosphate lyase, chloroplast precursor, putative, expressed	LOC_Os05g35440.1	serine hydroxymethyltransferase, mitochondrial precursor, putative, expressed	0.899
LOC_Os06g40170.1	phospholipase D, putative, expressed	LOC_Os05g42270.1	acyltransferase, putative, expressed	0.899
LOC_Os06g40180.1	phospholipase D, putative, expressed	LOC_Os05g42270.1	acyltransferase, putative, expressed	0.899
LOC_Os06g49790.1	acyltransferase, putative, expressed	LOC_Os06g40170.1	phospholipase D, putative, expressed	0.899
LOC_Os06g49790.1	acyltransferase, putative, expressed	LOC_Os06g40180.1	phospholipase D, putative, expressed	0.899
LOC_Os10g41550.1	beta-amylase, putative, expressed	LOC_Os06g51084.1	1,4-alpha-glucan-branching enzyme, chloroplast precursor, putative, expressed	0.899
LOC_Os10g41550.1	beta-amylase, putative, expressed	LOC_Os07g43390.1	4-alpha-glucanotransferase, chloroplast precursor, putative, expressed	0.899
LOC_Os11g08300.1	aldehyde dehydrogenase, putative, expressed	LOC_Os08g36320.1	decarboxylase, putative, expressed	0.899
LOC_Os09g26880.1	aldehyde dehydrogenase, putative, expressed	LOC_Os08g36320.1	decarboxylase, putative, expressed	0.899
LOC_Os12g26290.2	alpha-DOX2, putative, expressed	LOC_Os08g39840.1	lipoxygenase, chloroplast precursor, putative, expressed	0.899
LOC_Os12g26290.2	alpha-DOX2, putative, expressed	LOC_Os08g39850.1	lipoxygenase, chloroplast precursor, putative, expressed	0.899
LOC_Os11g10480.1	dehydrogenase, putative, expressed	LOC_Os09g26880.1	aldehyde dehydrogenase, putative, expressed	0.899
LOC_Os11g10480.1	dehydrogenase, putative, expressed	LOC_Os11g08300.1	aldehyde dehydrogenase, putative, expressed	0.899
LOC_Os09g08130.1	indole-3-glycerol phosphate synthase, chloroplast precursor, putative, expressed	LOC_Os03g61120.1	anthranilate synthase component I-1, chloroplast precursor, putative, expressed	0.85
LOC_Os05g09440.1	NADP-dependent malic enzyme, chloroplast precursor, putative, expressed	LOC_Os02g13840.1	citrate synthase, putative, expressed	0.845
LOC_Os02g13840.1	citrate synthase, putative, expressed	LOC_Os01g54030.1	NADP-dependent malic enzyme, putative, expressed	0.842
LOC_Os02g13840.1	citrate synthase, putative, expressed	LOC_Os01g09320.1	NADP-dependent malic enzyme, chloroplast precursor, putative, expressed	0.838
LOC_Os02g13840.1	citrate synthase, putative, expressed	LOC_Os02g10070.2	citrate synthase, putative, expressed	0.824
LOC_Os09g08130.1	indole-3-glycerol phosphate synthase, chloroplast precursor, putative, expressed	LOC_Os03g15780.1	anthranilate synthase component I-1, chloroplast precursor, putative, expressed	0.821
LOC_Os02g13840.1	citrate synthase, putative, expressed	LOC_Os01g02020.1	acetyl-CoA acetyltransferase, cytosolic, putative, expressed	0.817
LOC_Os04g53240.4	autophagy-related protein, putative, expressed	LOC_Os01g42850.1	ThiF family domain containing protein, putative, expressed	0.812
LOC_Os04g45970.1	glutamate dehydrogenase protein, putative, expressed	LOC_Os02g10070.2	citrate synthase, putative, expressed	0.811
LOC_Os05g38150.2	amino acid kinase, putative, expressed	LOC_Os03g18130.1	asparagine synthetase, putative, expressed	0.81
LOC_Os03g18130.1	asparagine synthetase, putative, expressed	LOC_Os01g62900.1	amino acid kinase, putative, expressed	0.807
LOC_Os08g36320.1	decarboxylase, putative, expressed	LOC_Os03g13300.1	glutamate decarboxylase, putative, expressed	0.805
LOC_Os03g14540.1	UDP-glucuronate 4-epimerase, putative, expressed	LOC_Os02g54890.1	UDP-glucuronate 4-epimerase, putative, expressed	0.804
LOC_Os05g35440.1	serine hydroxymethyltransferase, mitochondrial precursor, putative, expressed	LOC_Os01g65410.1	serine hydroxymethyltransferase, mitochondrial precursor, putative, expressed	0.803
LOC_Os03g18130.1	asparagine synthetase, putative, expressed	LOC_Os01g48960.1	glutamate synthase, chloroplast precursor, putative, expressed	0.802
LOC_Os02g10070.2	citrate synthase, putative, expressed	LOC_Os01g02020.1	acetyl-CoA acetyltransferase, cytosolic, putative, expressed	0.8
LOC_Os02g10070.2	citrate synthase, putative, expressed	LOC_Os01g09320.1	NADP-dependent malic enzyme, chloroplast precursor, putative, expressed	0.8
LOC_Os02g39570.1	ACT domain containing protein, expressed	LOC_Os01g09320.1	NADP-dependent malic enzyme, chloroplast precursor, putative, expressed	0.8
LOC_Os02g13840.1	citrate synthase, putative, expressed	LOC_Os01g16350.1	hydroxymethylglutaryl-CoA lyase, putative, expressed	0.8
LOC_Os02g10070.2	citrate synthase, putative, expressed	LOC_Os01g16350.1	hydroxymethylglutaryl-CoA lyase, putative, expressed	0.8
LOC_Os06g01630.5	2-oxo acid dehydrogenases acyltransferase domain containing protein, expressed	LOC_Os01g16350.1	hydroxymethylglutaryl-CoA lyase, putative, expressed	0.8
LOC_Os04g45970.1	glutamate dehydrogenase protein, putative, expressed	LOC_Os01g46070.1	lactate/malate dehydrogenase, putative, expressed	0.8
LOC_Os01g48960.1	glutamate synthase, chloroplast precursor, putative, expressed	LOC_Os01g46070.1	lactate/malate dehydrogenase, putative, expressed	0.8
LOC_Os02g10070.2	citrate synthase, putative, expressed	LOC_Os01g48960.1	glutamate synthase, chloroplast precursor, putative, expressed	0.8
LOC_Os02g13840.1	citrate synthase, putative, expressed	LOC_Os01g48960.1	glutamate synthase, chloroplast precursor, putative, expressed	0.8
LOC_Os04g40310.1	dehydrogenase, putative, expressed	LOC_Os01g48960.1	glutamate synthase, chloroplast precursor, putative, expressed	0.8
LOC_Os09g38320.1	phytoene synthase, chloroplast precursor, putative, expressed	LOC_Os01g50050.1	polyprenyl synthetase, putative, expressed	0.8
LOC_Os03g59040.1	squalene synthetase, putative, expressed	LOC_Os01g50050.1	polyprenyl synthetase, putative, expressed	0.8
LOC_Os02g10070.2	citrate synthase, putative, expressed	LOC_Os01g54030.1	NADP-dependent malic enzyme, putative, expressed	0.8
LOC_Os02g39570.1	ACT domain containing protein, expressed	LOC_Os01g54030.1	NADP-dependent malic enzyme, putative, expressed	0.8
LOC_Os05g45710.1	serine acetyltransferase protein, putative, expressed	LOC_Os01g65410.1	serine hydroxymethyltransferase, mitochondrial precursor, putative, expressed	0.8
LOC_Os05g09440.1	NADP-dependent malic enzyme, chloroplast precursor, putative, expressed	LOC_Os02g10070.2	citrate synthase, putative, expressed	0.8
LOC_Os03g02710.1	hydroxymethylglutaryl-CoA synthase, putative, expressed	LOC_Os02g10070.2	citrate synthase, putative, expressed	0.8
LOC_Os04g45970.1	glutamate dehydrogenase protein, putative, expressed	LOC_Os02g13840.1	citrate synthase, putative, expressed	0.8
LOC_Os03g02710.1	hydroxymethylglutaryl-CoA synthase, putative, expressed	LOC_Os02g13840.1	citrate synthase, putative, expressed	0.8
LOC_Os03g61120.1	anthranilate synthase component I-1, chloroplast precursor, putative, expressed	LOC_Os02g19924.1	aminotransferase, classes I and II, domain containing protein, expressed	0.8
LOC_Os04g38950.1	class I glutamine amidotransferase, putative, expressed	LOC_Os02g19924.1	aminotransferase, classes I and II, domain containing protein, expressed	0.8
LOC_Os04g40040.1	copper methylamine oxidase precursor, putative, expressed	LOC_Os02g19924.1	aminotransferase, classes I and II, domain containing protein, expressed	0.8
LOC_Os03g15780.1	anthranilate synthase component I-1, chloroplast precursor, putative, expressed	LOC_Os02g19924.1	aminotransferase, classes I and II, domain containing protein, expressed	0.8
LOC_Os05g09440.1	NADP-dependent malic enzyme, chloroplast precursor, putative, expressed	LOC_Os02g39570.1	ACT domain containing protein, expressed	0.8
LOC_Os06g01630.5	2-oxo acid dehydrogenases acyltransferase domain containing protein, expressed	LOC_Os03g02710.1	hydroxymethylglutaryl-CoA synthase, putative, expressed	0.8
LOC_Os03g59040.1	squalene synthetase, putative, expressed	LOC_Os03g10080.1	expressed protein	0.8
LOC_Os09g38320.1	phytoene synthase, chloroplast precursor, putative, expressed	LOC_Os03g10080.1	expressed protein	0.8
LOC_Os03g18130.1	asparagine synthetase, putative, expressed	LOC_Os03g13300.1	glutamate decarboxylase, putative, expressed	0.8
LOC_Os09g26880.1	aldehyde dehydrogenase, putative, expressed	LOC_Os03g18130.1	asparagine synthetase, putative, expressed	0.8
LOC_Os11g08300.1	aldehyde dehydrogenase, putative, expressed	LOC_Os03g18130.1	asparagine synthetase, putative, expressed	0.8
LOC_Os08g36320.1	decarboxylase, putative, expressed	LOC_Os03g18130.1	asparagine synthetase, putative, expressed	0.8
LOC_Os05g45210.1	respiratory burst oxidase, putative, expressed	LOC_Os03g57450.1	CAMK_CAMK_like.2 - CAMK includes calcium/calmodulin depedent protein kinases, expressed	0.8
LOC_Os04g56210.1	polyprenyl synthetase, putative, expressed	LOC_Os03g59040.1	squalene synthetase, putative, expressed	0.8
LOC_Os06g13720.1	dehydrogenase E1 component domain containing protein, expressed	LOC_Os04g19740.1	transketolase, chloroplast precursor, putative, expressed	0.8
LOC_Os04g45970.1	glutamate dehydrogenase protein, putative, expressed	LOC_Os04g40310.1	dehydrogenase, putative, expressed	0.8
LOC_Os09g38320.1	phytoene synthase, chloroplast precursor, putative, expressed	LOC_Os04g56210.1	polyprenyl synthetase, putative, expressed	0.8
LOC_Os05g45710.1	serine acetyltransferase protein, putative, expressed	LOC_Os05g35440.1	serine hydroxymethyltransferase, mitochondrial precursor, putative, expressed	0.8
LOC_Os07g38120.1	CAMK_CAMK_like.34 - CAMK includes calcium/calmodulin depedent protein kinases, expressed	LOC_Os05g45210.1	respiratory burst oxidase, putative, expressed	0.8
LOC_Os07g08430.1	indole-3-glycerol phosphate lyase, chloroplast precursor, putative, expressed	LOC_Os05g45710.1	serine acetyltransferase protein, putative, expressed	0.8
LOC_Os08g02700.1	fructose-bisphospate aldolase isozyme, putative, expressed	LOC_Os06g13720.1	dehydrogenase E1 component domain containing protein, expressed	0.8
LOC_Os08g09200.1	aconitate hydratase protein, putative, expressed	LOC_Os02g13840.1	citrate synthase, putative, expressed	0.787
LOC_Os07g07470.1	transketolase, putative, expressed	LOC_Os06g13720.1	dehydrogenase E1 component domain containing protein, expressed	0.779
LOC_Os07g08430.1	indole-3-glycerol phosphate lyase, chloroplast precursor, putative, expressed	LOC_Os03g61120.1	anthranilate synthase component I-1, chloroplast precursor, putative, expressed	0.777
LOC_Os09g08130.1	indole-3-glycerol phosphate synthase, chloroplast precursor, putative, expressed	LOC_Os04g38950.1	class I glutamine amidotransferase, putative, expressed	0.773
LOC_Os07g08430.1	indole-3-glycerol phosphate lyase, chloroplast precursor, putative, expressed	LOC_Os03g15780.1	anthranilate synthase component I-1, chloroplast precursor, putative, expressed	0.737
LOC_Os02g33110.1	glycosyl hydrolases, putative, expressed	LOC_Os01g22900.1	neutral/alkaline invertase, putative, expressed	0.698
LOC_Os06g04280.1	3-phosphoshikimate 1-carboxyvinyltransferase, chloroplast precursor, putative, expressed	LOC_Os03g03450.1	anthranilate phosphoribosyltransferase, chloroplast precursor, putative, expressed	0.691
LOC_Os07g08430.1	indole-3-glycerol phosphate lyase, chloroplast precursor, putative, expressed	LOC_Os04g38950.1	class I glutamine amidotransferase, putative, expressed	0.683
LOC_Os12g41250.1	methylcrotonoyl-CoA carboxylase subunit alpha, mitochondrial precursor, putative, expressed	LOC_Os08g37874.1	2-nitropropane dioxygenase family, putative, expressed	0.66
LOC_Os03g46470.1	metal cation transporter, putative, expressed	LOC_Os01g72370.1	helix-loop-helix DNA-binding domain containing protein, expressed	0.613
LOC_Os04g40310.1	dehydrogenase, putative, expressed	LOC_Os02g13840.1	citrate synthase, putative, expressed	0.582
LOC_Os05g46760.1	STE_MEKK_ste11_MAP3K.19 - STE kinases include homologs to sterile 7, sterile 11 and sterile 20 from yeast, expressed	LOC_Os04g52840.1	tyrosine protein kinase domain containing protein, putative, expressed	0.576
LOC_Os06g06560.1	starch synthase, putative, expressed	LOC_Os05g50380.1	glucose-1-phosphate adenylyltransferase large subunit, chloroplast precursor, putative, expressed	0.559
LOC_Os12g41250.1	methylcrotonoyl-CoA carboxylase subunit alpha, mitochondrial precursor, putative, expressed	LOC_Os02g13840.1	citrate synthase, putative, expressed	0.558
LOC_Os07g43390.1	4-alpha-glucanotransferase, chloroplast precursor, putative, expressed	LOC_Os06g51084.1	1,4-alpha-glucan-branching enzyme, chloroplast precursor, putative, expressed	0.541
LOC_Os10g37340.1	cystathionine gamma-synthase, putative, expressed	LOC_Os05g39310.1	thiamine pyrophosphate enzyme, C-terminal TPP binding domain containing protein, expressed	0.539
LOC_Os05g46760.1	STE_MEKK_ste11_MAP3K.19 - STE kinases include homologs to sterile 7, sterile 11 and sterile 20 from yeast, expressed	LOC_Os01g14440.1	WRKY1, expressed	0.532
LOC_Os05g25920.1	expressed protein	LOC_Os01g14440.1	WRKY1, expressed	0.532
LOC_Os01g61080.1	WRKY24, expressed	LOC_Os01g14440.1	WRKY1, expressed	0.532
LOC_Os01g44120.1	expressed protein	LOC_Os01g14440.1	WRKY1, expressed	0.532
LOC_Os05g50380.1	glucose-1-phosphate adenylyltransferase large subunit, chloroplast precursor, putative, expressed	LOC_Os01g14440.1	WRKY1, expressed	0.532
LOC_Os10g37340.1	cystathionine gamma-synthase, putative, expressed	LOC_Os01g50100.1	ABC transporter, ATP-binding protein, putative, expressed	0.532
LOC_Os05g25920.1	expressed protein	LOC_Os01g61080.1	WRKY24, expressed	0.532
LOC_Os06g44010.1	WRKY28, expressed	LOC_Os01g61080.1	WRKY24, expressed	0.532
LOC_Os03g17700.1	CGMC_MAPKCGMC_2_ERK.2 - CGMC includes CDA, MAPK, GSK3, and CLKC kinases, expressed	LOC_Os01g62430.1	C2 domain containing protein, putative, expressed	0.532
LOC_Os08g28710.1	receptor protein kinase CRINKLY4 precursor, putative, expressed	LOC_Os01g62430.1	C2 domain containing protein, putative, expressed	0.532
LOC_Os06g44010.1	WRKY28, expressed	LOC_Os02g08440.1	WRKY71, expressed	0.532
LOC_Os05g47960.1	expressed protein	LOC_Os02g08440.1	WRKY71, expressed	0.532
LOC_Os08g01390.1	phosphatidylinositol-4-phosphate 5-Kinase, putative, expressed	LOC_Os02g17390.1	3-hydroxyacyl-CoA dehydrogenase, putative, expressed	0.532
LOC_Os02g38900.1	cytosolic Fe-S cluster assembling factor NBP35, putative, expressed	LOC_Os02g34600.1	CAMK_CAMK_like.13 - CAMK includes calcium/calmodulin depedent protein kinases, expressed	0.532
LOC_Os08g04840.1	MYB family transcription factor, putative, expressed	LOC_Os02g46030.1	MYB family transcription factor, putative, expressed	0.532
LOC_Os05g50100.1	expressed protein	LOC_Os02g50730.1	metalloendoproteinase 1 precursor, putative, expressed	0.532
LOC_Os10g42690.1	jmjC domain containing protein, expressed	LOC_Os02g51350.1	OsFBK10 - F-box domain and kelch repeat containing protein, expressed	0.532
LOC_Os07g01370.1	peroxidase precursor, putative, expressed	LOC_Os02g51890.1	RNA recognition motif containing protein, putative, expressed	0.532
LOC_Os08g38210.1	transcription factor BIM2, putative, expressed	LOC_Os03g17700.1	CGMC_MAPKCGMC_2_ERK.2 - CGMC includes CDA, MAPK, GSK3, and CLKC kinases, expressed	0.532
LOC_Os10g25230.1	ZIM domain containing protein, putative, expressed	LOC_Os03g17700.1	CGMC_MAPKCGMC_2_ERK.2 - CGMC includes CDA, MAPK, GSK3, and CLKC kinases, expressed	0.532
LOC_Os07g09680.1	ras-related protein, putative, expressed	LOC_Os03g21030.1	no apical meristem protein, putative, expressed	0.532
LOC_Os07g09680.1	ras-related protein, putative, expressed	LOC_Os03g49380.1	lipoxygenase, putative, expressed	0.532
LOC_Os09g37012.1	eukaryotic aspartyl protease domain containing protein, expressed	LOC_Os04g25440.1	cytokinin-O-glucosyltransferase 2, putative, expressed	0.532
LOC_Os06g44250.1	haemolysin-III, putative, expressed	LOC_Os05g03620.1	TKL_IRAK_CR4L.4 - The CR4L subfamily has homology with Crinkly4, expressed	0.532
LOC_Os06g44010.1	WRKY28, expressed	LOC_Os05g25920.1	expressed protein	0.532
LOC_Os06g44010.1	WRKY28, expressed	LOC_Os05g47960.1	expressed protein	0.532
LOC_Os12g36110.1	calmodulin binding protein, putative, expressed	LOC_Os05g47960.1	expressed protein	0.532
LOC_Os07g09670.1	galactosyltransferase family protein, putative, expressed	LOC_Os06g44250.1	haemolysin-III, putative, expressed	0.532
LOC_Os10g42690.1	jmjC domain containing protein, expressed	LOC_Os06g44250.1	haemolysin-III, putative, expressed	0.532
LOC_Os08g04340.1	plastocyanin-like domain containing protein, putative, expressed	LOC_Os07g09420.1	ATPase, putative, expressed	0.532
LOC_Os10g42690.1	jmjC domain containing protein, expressed	LOC_Os07g09670.1	galactosyltransferase family protein, putative, expressed	0.532
LOC_Os10g25230.1	ZIM domain containing protein, putative, expressed	LOC_Os08g38210.1	transcription factor BIM2, putative, expressed	0.532
LOC_Os10g37760.1	OsRhmbd17 - Putative Rhomboid homologue, expressed	LOC_Os10g25230.1	ZIM domain containing protein, putative, expressed	0.532
LOC_Os03g21030.1	no apical meristem protein, putative, expressed	LOC_Os01g14440.1	WRKY1, expressed	0.53
LOC_Os04g52840.1	tyrosine protein kinase domain containing protein, putative, expressed	LOC_Os01g63060.1	phosphatidic acid phosphatase-related, putative, expressed	0.53
LOC_Os06g44010.1	WRKY28, expressed	LOC_Os01g70790.1	SRC2 protein, putative, expressed	0.53
LOC_Os05g25920.1	expressed protein	LOC_Os02g08440.1	WRKY71, expressed	0.53
LOC_Os09g17152.1	OsFBX319 - F-box domain containing protein, expressed	LOC_Os01g62430.1	C2 domain containing protein, putative, expressed	0.527
LOC_Os03g17700.1	CGMC_MAPKCGMC_2_ERK.2 - CGMC includes CDA, MAPK, GSK3, and CLKC kinases, expressed	LOC_Os02g50600.1	glycosyl transferase 8 domain containing protein, putative, expressed	0.527
LOC_Os03g17700.1	CGMC_MAPKCGMC_2_ERK.2 - CGMC includes CDA, MAPK, GSK3, and CLKC kinases, expressed	LOC_Os02g51350.1	OsFBK10 - F-box domain and kelch repeat containing protein, expressed	0.527
LOC_Os06g50930.1	rhodanese-like domain containing protein, putative, expressed	LOC_Os02g51890.1	RNA recognition motif containing protein, putative, expressed	0.527
LOC_Os08g38210.1	transcription factor BIM2, putative, expressed	LOC_Os06g44250.1	haemolysin-III, putative, expressed	0.527
LOC_Os03g17700.1	CGMC_MAPKCGMC_2_ERK.2 - CGMC includes CDA, MAPK, GSK3, and CLKC kinases, expressed	LOC_Os01g04280.1	calmodulin binding protein, putative, expressed	0.523
LOC_Os02g08440.1	WRKY71, expressed	LOC_Os01g61080.1	WRKY24, expressed	0.523
LOC_Os02g51350.1	OsFBK10 - F-box domain and kelch repeat containing protein, expressed	LOC_Os01g14440.1	WRKY1, expressed	0.52
LOC_Os03g59360.1	remorin, putative, expressed	LOC_Os01g57570.1	NADPH-dependent FMN reductase domain containing protein, expressed	0.52
LOC_Os09g17152.1	OsFBX319 - F-box domain containing protein, expressed	LOC_Os03g60650.1	protein phosphatase 2C, putative, expressed	0.52
LOC_Os09g38910.1	OsWAK92 - OsWAK receptor-like protein kinase, expressed	LOC_Os04g52840.1	tyrosine protein kinase domain containing protein, putative, expressed	0.52
LOC_Os02g08440.1	WRKY71, expressed	LOC_Os01g14440.1	WRKY1, expressed	0.516
LOC_Os07g38120.1	CAMK_CAMK_like.34 - CAMK includes calcium/calmodulin depedent protein kinases, expressed	LOC_Os05g46760.1	STE_MEKK_ste11_MAP3K.19 - STE kinases include homologs to sterile 7, sterile 11 and sterile 20 from yeast, expressed	0.512
LOC_Os10g25230.1	ZIM domain containing protein, putative, expressed	LOC_Os01g04280.1	calmodulin binding protein, putative, expressed	0.508
LOC_Os03g04410.1	aconitate hydratase protein, putative, expressed	LOC_Os01g42410.1	pleiotropic drug resistance protein, putative, expressed	0.508
LOC_Os02g17390.1	3-hydroxyacyl-CoA dehydrogenase, putative, expressed	LOC_Os01g43650.1	WRKY11, expressed	0.508
LOC_Os09g38910.1	OsWAK92 - OsWAK receptor-like protein kinase, expressed	LOC_Os03g48660.1	DUF1336 domain containing protein, expressed	0.508
LOC_Os04g55970.1	AP2-like ethylene-responsive transcription factor AINTEGUMENTA, putative, expressed	LOC_Os03g17164.1	kinesin-related protein, putative, expressed	0.505
LOC_Os05g46760.1	STE_MEKK_ste11_MAP3K.19 - STE kinases include homologs to sterile 7, sterile 11 and sterile 20 from yeast, expressed	LOC_Os05g25920.1	expressed protein	0.505
LOC_Os05g47960.1	expressed protein	LOC_Os05g46760.1	STE_MEKK_ste11_MAP3K.19 - STE kinases include homologs to sterile 7, sterile 11 and sterile 20 from yeast, expressed	0.505
LOC_Os07g38120.1	CAMK_CAMK_like.34 - CAMK includes calcium/calmodulin depedent protein kinases, expressed	LOC_Os01g70790.1	SRC2 protein, putative, expressed	0.501
LOC_Os07g09670.1	galactosyltransferase family protein, putative, expressed	LOC_Os01g70790.1	SRC2 protein, putative, expressed	0.501
LOC_Os12g36110.1	calmodulin binding protein, putative, expressed	LOC_Os02g08440.1	WRKY71, expressed	0.501
LOC_Os07g42626.1	STRUBBELIG-RECEPTOR FAMILY 6 precursor, putative, expressed	LOC_Os03g18130.1	asparagine synthetase, putative, expressed	0.501
LOC_Os09g38960.2	potassium transporter, putative, expressed	LOC_Os03g64070.1	uncharacterized protein PA4923, putative, expressed	0.501
LOC_Os08g38210.1	transcription factor BIM2, putative, expressed	LOC_Os05g46760.1	STE_MEKK_ste11_MAP3K.19 - STE kinases include homologs to sterile 7, sterile 11 and sterile 20 from yeast, expressed	0.501
LOC_Os10g42690.1	jmjC domain containing protein, expressed	LOC_Os05g46760.1	STE_MEKK_ste11_MAP3K.19 - STE kinases include homologs to sterile 7, sterile 11 and sterile 20 from yeast, expressed	0.501
LOC_Os06g04280.1	3-phosphoshikimate 1-carboxyvinyltransferase, chloroplast precursor, putative, expressed	LOC_Os03g61120.1	anthranilate synthase component I-1, chloroplast precursor, putative, expressed	0.497
LOC_Os07g09670.1	galactosyltransferase family protein, putative, expressed	LOC_Os01g14440.1	WRKY1, expressed	0.496
LOC_Os08g27170.1	calmodulin binding protein, putative, expressed	LOC_Os01g43480.1	AAA-type ATPase family protein, putative, expressed	0.496
LOC_Os08g28710.1	receptor protein kinase CRINKLY4 precursor, putative, expressed	LOC_Os01g52530.1	phosphoribosyl transferase, putative, expressed	0.496
LOC_Os05g46750.1	STE_MEKK_ste11_MAP3K.18 - STE kinases include homologs to sterile 7, sterile 11 and sterile 20 from yeast, expressed	LOC_Os03g17700.1	CGMC_MAPKCGMC_2_ERK.2 - CGMC includes CDA, MAPK, GSK3, and CLKC kinases, expressed	0.496
LOC_Os05g50380.1	glucose-1-phosphate adenylyltransferase large subunit, chloroplast precursor, putative, expressed	LOC_Os05g46760.1	STE_MEKK_ste11_MAP3K.19 - STE kinases include homologs to sterile 7, sterile 11 and sterile 20 from yeast, expressed	0.496
LOC_Os03g24220.1	villin protein, putative, expressed	LOC_Os01g43580.1	kinesin motor domain containing protein, putative, expressed	0.492
LOC_Os03g08860.1	GRAM domain containing protein, expressed	LOC_Os01g50100.1	ABC transporter, ATP-binding protein, putative, expressed	0.492
LOC_Os12g41250.1	methylcrotonoyl-CoA carboxylase subunit alpha, mitochondrial precursor, putative, expressed	LOC_Os01g16350.1	hydroxymethylglutaryl-CoA lyase, putative, expressed	0.489
LOC_Os05g48690.1	transcription factor like protein, putative, expressed	LOC_Os02g03410.1	CAMK_CAMK_like.12 - CAMK includes calcium/calmodulin depedent protein kinases, expressed	0.489
LOC_Os09g27750.1	1-aminocyclopropane-1-carboxylate oxidase 1, putative, expressed	LOC_Os02g43010.1	vacuolar-processing enzyme precursor, putative, expressed	0.489
LOC_Os10g37760.1	OsRhmbd17 - Putative Rhomboid homologue, expressed	LOC_Os05g46750.1	STE_MEKK_ste11_MAP3K.18 - STE kinases include homologs to sterile 7, sterile 11 and sterile 20 from yeast, expressed	0.489
LOC_Os08g38210.1	transcription factor BIM2, putative, expressed	LOC_Os05g46750.1	STE_MEKK_ste11_MAP3K.18 - STE kinases include homologs to sterile 7, sterile 11 and sterile 20 from yeast, expressed	0.489
LOC_Os10g25230.1	ZIM domain containing protein, putative, expressed	LOC_Os05g46750.1	STE_MEKK_ste11_MAP3K.18 - STE kinases include homologs to sterile 7, sterile 11 and sterile 20 from yeast, expressed	0.489
LOC_Os03g49380.1	lipoxygenase, putative, expressed	LOC_Os01g63060.1	phosphatidic acid phosphatase-related, putative, expressed	0.486
LOC_Os08g38210.1	transcription factor BIM2, putative, expressed	LOC_Os01g04280.1	calmodulin binding protein, putative, expressed	0.481
LOC_Os06g44010.1	WRKY28, expressed	LOC_Os01g14440.1	WRKY1, expressed	0.481
LOC_Os05g25920.1	expressed protein	LOC_Os01g44120.1	expressed protein	0.481
LOC_Os06g44250.1	haemolysin-III, putative, expressed	LOC_Os01g70790.1	SRC2 protein, putative, expressed	0.481
LOC_Os10g37760.1	OsRhmbd17 - Putative Rhomboid homologue, expressed	LOC_Os03g17700.1	CGMC_MAPKCGMC_2_ERK.2 - CGMC includes CDA, MAPK, GSK3, and CLKC kinases, expressed	0.481
LOC_Os05g25920.1	expressed protein	LOC_Os03g49380.1	lipoxygenase, putative, expressed	0.481
LOC_Os07g01370.1	peroxidase precursor, putative, expressed	LOC_Os06g50930.1	rhodanese-like domain containing protein, putative, expressed	0.481
LOC_Os12g39620.1	disease resistance protein, putative, expressed	LOC_Os05g01940.1	zinc finger, RING-type, putative, expressed	0.477
LOC_Os08g38210.1	transcription factor BIM2, putative, expressed	LOC_Os05g47960.1	expressed protein	0.477
LOC_Os04g52840.1	tyrosine protein kinase domain containing protein, putative, expressed	LOC_Os01g14440.1	WRKY1, expressed	0.474
LOC_Os02g45780.1	zinc finger, C3HC4 type domain containing protein, expressed	LOC_Os01g63060.1	phosphatidic acid phosphatase-related, putative, expressed	0.474
LOC_Os12g42220.1	expressed protein	LOC_Os11g07930.1	oxidoreductase, short chain dehydrogenase/reductase family domain containing family, expressed	0.47
LOC_Os01g70790.1	SRC2 protein, putative, expressed	LOC_Os01g14440.1	WRKY1, expressed	0.467
LOC_Os05g47960.1	expressed protein	LOC_Os01g15640.1	no apical meristem protein, putative, expressed	0.467
LOC_Os06g44250.1	haemolysin-III, putative, expressed	LOC_Os02g50600.1	glycosyl transferase 8 domain containing protein, putative, expressed	0.467
LOC_Os07g34520.1	isocitrate lyase, putative, expressed	LOC_Os02g13840.1	citrate synthase, putative, expressed	0.462
LOC_Os11g34720.1	Ser/Thr protein phosphatase family protein, putative, expressed	LOC_Os04g33530.1	Ser/Thr protein phosphatase family protein, putative, expressed	0.459
LOC_Os07g38120.1	CAMK_CAMK_like.34 - CAMK includes calcium/calmodulin depedent protein kinases, expressed	LOC_Os01g14440.1	WRKY1, expressed	0.458
LOC_Os01g61080.1	WRKY24, expressed	LOC_Os01g44120.1	expressed protein	0.458
LOC_Os09g19790.1	puromycin-sensitive aminopeptidase, putative, expressed	LOC_Os01g57570.1	NADPH-dependent FMN reductase domain containing protein, expressed	0.458
LOC_Os08g37444.1	signal recognition particle receptor, putative, expressed	LOC_Os05g43390.1	signal recognition particle 54 kDa protein, putative, expressed	0.457
LOC_Os10g42690.1	jmjC domain containing protein, expressed	LOC_Os01g14440.1	WRKY1, expressed	0.456
LOC_Os09g27700.1	microtubule associated protein, putative, expressed	LOC_Os03g06570.1	IQ calmodulin-binding motif family protein, putative, expressed	0.456
LOC_Os08g38210.1	transcription factor BIM2, putative, expressed	LOC_Os02g08440.1	WRKY71, expressed	0.452
LOC_Os12g36110.1	calmodulin binding protein, putative, expressed	LOC_Os06g44010.1	WRKY28, expressed	0.452
LOC_Os10g37760.1	OsRhmbd17 - Putative Rhomboid homologue, expressed	LOC_Os08g38210.1	transcription factor BIM2, putative, expressed	0.452
LOC_Os07g43390.1	4-alpha-glucanotransferase, chloroplast precursor, putative, expressed	LOC_Os06g06560.1	starch synthase, putative, expressed	0.448
LOC_Os08g38210.1	transcription factor BIM2, putative, expressed	LOC_Os02g50600.1	glycosyl transferase 8 domain containing protein, putative, expressed	0.447
LOC_Os02g41520.1	glycosyl transferase 8 domain containing protein, putative, expressed	LOC_Os01g07120.1	AP2 domain containing protein, expressed	0.445
LOC_Os06g44010.1	WRKY28, expressed	LOC_Os01g58130.1	expressed protein	0.445
LOC_Os11g32260.1	lysosomal alpha-mannosidase precursor, putative, expressed	LOC_Os01g63190.1	laccase precursor protein, putative, expressed	0.445
LOC_Os10g42690.1	jmjC domain containing protein, expressed	LOC_Os02g41520.1	glycosyl transferase 8 domain containing protein, putative, expressed	0.445
LOC_Os05g46760.1	STE_MEKK_ste11_MAP3K.19 - STE kinases include homologs to sterile 7, sterile 11 and sterile 20 from yeast, expressed	LOC_Os02g51350.1	OsFBK10 - F-box domain and kelch repeat containing protein, expressed	0.445
LOC_Os08g38210.1	transcription factor BIM2, putative, expressed	LOC_Os02g51350.1	OsFBK10 - F-box domain and kelch repeat containing protein, expressed	0.445
LOC_Os05g06990.1	TKL_IRAK_CrRLK1L-1.10 - The CrRLK1L-1 subfamily has homology to the CrRLK1L homolog, expressed	LOC_Os02g51890.1	RNA recognition motif containing protein, putative, expressed	0.445
LOC_Os04g01540.1	expressed protein	LOC_Os02g52340.1	OsMADS22 - MADS-box family gene with MIKCc type-box, expressed	0.445
LOC_Os04g17100.1	heavy metal-associated domain containing protein, expressed	LOC_Os03g45280.1	dehydrin, putative, expressed	0.445
LOC_Os12g32610.1	expressed protein	LOC_Os03g45730.1	DNA-binding protein-like, putative, expressed	0.445
LOC_Os06g44250.1	haemolysin-III, putative, expressed	LOC_Os05g46760.1	STE_MEKK_ste11_MAP3K.19 - STE kinases include homologs to sterile 7, sterile 11 and sterile 20 from yeast, expressed	0.445
LOC_Os08g44270.1	vignain precursor, putative, expressed	LOC_Os08g10450.1	nucleoside transporter, putative, expressed	0.445
LOC_Os03g53750.1	nuclear prelamin A recognition factor, putative, expressed	LOC_Os02g38900.1	cytosolic Fe-S cluster assembling factor NBP35, putative, expressed	0.444
LOC_Os03g10110.1	cupin domain containing protein, expressed	LOC_Os01g03060.1	splicing factor, putative, expressed	0.443
LOC_Os10g37760.1	OsRhmbd17 - Putative Rhomboid homologue, expressed	LOC_Os01g04280.1	calmodulin binding protein, putative, expressed	0.443
LOC_Os05g46750.1	STE_MEKK_ste11_MAP3K.18 - STE kinases include homologs to sterile 7, sterile 11 and sterile 20 from yeast, expressed	LOC_Os01g04280.1	calmodulin binding protein, putative, expressed	0.443
LOC_Os12g36110.1	calmodulin binding protein, putative, expressed	LOC_Os01g04280.1	calmodulin binding protein, putative, expressed	0.443
LOC_Os02g50730.1	metalloendoproteinase 1 precursor, putative, expressed	LOC_Os01g14440.1	WRKY1, expressed	0.443
LOC_Os12g36110.1	calmodulin binding protein, putative, expressed	LOC_Os01g15640.1	no apical meristem protein, putative, expressed	0.443
LOC_Os06g49890.1	coiled-coil domain-containing protein 90A, mitochondrial precursor, putative, expressed	LOC_Os01g15640.1	no apical meristem protein, putative, expressed	0.443
LOC_Os02g55560.1	protein phosphatase 2C, putative, expressed	LOC_Os01g22900.1	neutral/alkaline invertase, putative, expressed	0.443
LOC_Os01g63060.1	phosphatidic acid phosphatase-related, putative, expressed	LOC_Os01g44120.1	expressed protein	0.443
LOC_Os03g09170.1	ethylene-responsive transcription factor, putative, expressed	LOC_Os01g50370.1	STE_MEKK_ste11_MAP3K.4 - STE kinases include homologs to sterile 7, sterile 11 and sterile 20 from yeast, expressed	0.443
LOC_Os05g46760.1	STE_MEKK_ste11_MAP3K.19 - STE kinases include homologs to sterile 7, sterile 11 and sterile 20 from yeast, expressed	LOC_Os01g61080.1	WRKY24, expressed	0.443
LOC_Os06g44250.1	haemolysin-III, putative, expressed	LOC_Os01g61080.1	WRKY24, expressed	0.443
LOC_Os03g57310.1	syntaxin, putative, expressed	LOC_Os01g62430.1	C2 domain containing protein, putative, expressed	0.443
LOC_Os05g25920.1	expressed protein	LOC_Os01g63060.1	phosphatidic acid phosphatase-related, putative, expressed	0.443
LOC_Os05g46760.1	STE_MEKK_ste11_MAP3K.19 - STE kinases include homologs to sterile 7, sterile 11 and sterile 20 from yeast, expressed	LOC_Os01g63060.1	phosphatidic acid phosphatase-related, putative, expressed	0.443
LOC_Os05g21180.2	phosphatidic acid phosphatase-related, putative, expressed	LOC_Os02g41520.1	glycosyl transferase 8 domain containing protein, putative, expressed	0.443
LOC_Os09g28354.1	CPuORF39 - conserved peptide uORF-containing transcript, expressed	LOC_Os02g50600.1	glycosyl transferase 8 domain containing protein, putative, expressed	0.443
LOC_Os05g01940.1	zinc finger, RING-type, putative, expressed	LOC_Os02g51350.1	OsFBK10 - F-box domain and kelch repeat containing protein, expressed	0.443
LOC_Os06g21380.1	OsCttP3 - Putative C-terminal processing peptidase homologue, expressed	LOC_Os03g03450.1	anthranilate phosphoribosyltransferase, chloroplast precursor, putative, expressed	0.443
LOC_Os09g17152.1	OsFBX319 - F-box domain containing protein, expressed	LOC_Os03g15770.2	tyrosine protein kinase domain containing protein, putative, expressed	0.443
LOC_Os05g46760.1	STE_MEKK_ste11_MAP3K.19 - STE kinases include homologs to sterile 7, sterile 11 and sterile 20 from yeast, expressed	LOC_Os03g17700.1	CGMC_MAPKCGMC_2_ERK.2 - CGMC includes CDA, MAPK, GSK3, and CLKC kinases, expressed	0.443
LOC_Os09g04790.1	PAP fibrillin family domain containing protein, expressed	LOC_Os04g01540.1	expressed protein	0.443
LOC_Os12g36910.1	calmodulin binding protein, putative, expressed	LOC_Os04g49450.1	MYB family transcription factor, putative, expressed	0.443
LOC_Os08g35740.1	12-oxophytodienoate reductase, putative, expressed	LOC_Os04g55920.1	zinc-finger protein, putative, expressed	0.443
LOC_Os05g46760.1	STE_MEKK_ste11_MAP3K.19 - STE kinases include homologs to sterile 7, sterile 11 and sterile 20 from yeast, expressed	LOC_Os05g03620.1	TKL_IRAK_CR4L.4 - The CR4L subfamily has homology with Crinkly4, expressed	0.443
LOC_Os07g09670.1	galactosyltransferase family protein, putative, expressed	LOC_Os05g03620.1	TKL_IRAK_CR4L.4 - The CR4L subfamily has homology with Crinkly4, expressed	0.443
LOC_Os10g42410.3	zinc-binding protein, putative, expressed	LOC_Os05g21180.2	phosphatidic acid phosphatase-related, putative, expressed	0.443
LOC_Os05g50100.1	expressed protein	LOC_Os05g25920.1	expressed protein	0.443
LOC_Os05g46760.1	STE_MEKK_ste11_MAP3K.19 - STE kinases include homologs to sterile 7, sterile 11 and sterile 20 from yeast, expressed	LOC_Os05g39930.1	spotted leaf 11, putative, expressed	0.443
LOC_Os07g38120.1	CAMK_CAMK_like.34 - CAMK includes calcium/calmodulin depedent protein kinases, expressed	LOC_Os05g47960.1	expressed protein	0.443
LOC_Os07g09670.1	galactosyltransferase family protein, putative, expressed	LOC_Os05g50100.1	expressed protein	0.443
LOC_Os08g04630.1	external NADH-ubiquinone oxidoreductase 1, mitochondrial precursor, putative, expressed	LOC_Os05g50100.1	expressed protein	0.443
LOC_Os07g38120.1	CAMK_CAMK_like.34 - CAMK includes calcium/calmodulin depedent protein kinases, expressed	LOC_Os06g44010.1	WRKY28, expressed	0.443
LOC_Os10g42690.1	jmjC domain containing protein, expressed	LOC_Os07g38120.1	CAMK_CAMK_like.34 - CAMK includes calcium/calmodulin depedent protein kinases, expressed	0.443
LOC_Os08g28710.1	receptor protein kinase CRINKLY4 precursor, putative, expressed	LOC_Os08g04630.1	external NADH-ubiquinone oxidoreductase 1, mitochondrial precursor, putative, expressed	0.443
LOC_Os12g36110.1	calmodulin binding protein, putative, expressed	LOC_Os08g38210.1	transcription factor BIM2, putative, expressed	0.443
LOC_Os01g63060.1	phosphatidic acid phosphatase-related, putative, expressed	LOC_Os01g14440.1	WRKY1, expressed	0.441
LOC_Os05g47960.1	expressed protein	LOC_Os01g58130.1	expressed protein	0.441
LOC_Os05g25920.1	expressed protein	LOC_Os01g74370.1	domain of unknown function DUF966 domain containing protein, expressed	0.441
LOC_Os07g38120.1	CAMK_CAMK_like.34 - CAMK includes calcium/calmodulin depedent protein kinases, expressed	LOC_Os02g51350.1	OsFBK10 - F-box domain and kelch repeat containing protein, expressed	0.441
LOC_Os04g52840.1	tyrosine protein kinase domain containing protein, putative, expressed	LOC_Os03g60650.1	protein phosphatase 2C, putative, expressed	0.441
LOC_Os08g37670.1	plastocyanin-like domain containing protein, putative, expressed	LOC_Os08g28710.1	receptor protein kinase CRINKLY4 precursor, putative, expressed	0.441
LOC_Os01g57570.1	NADPH-dependent FMN reductase domain containing protein, expressed	LOC_Os01g56180.1	expressed protein	0.439
LOC_Os03g49380.1	lipoxygenase, putative, expressed	LOC_Os01g61080.1	WRKY24, expressed	0.439
LOC_Os07g09420.1	ATPase, putative, expressed	LOC_Os01g61080.1	WRKY24, expressed	0.439
LOC_Os05g46760.1	STE_MEKK_ste11_MAP3K.19 - STE kinases include homologs to sterile 7, sterile 11 and sterile 20 from yeast, expressed	LOC_Os02g08440.1	WRKY71, expressed	0.439
LOC_Os10g25230.1	ZIM domain containing protein, putative, expressed	LOC_Os02g08440.1	WRKY71, expressed	0.439
LOC_Os05g21180.2	phosphatidic acid phosphatase-related, putative, expressed	LOC_Os03g55320.1	protein phosphatase 2C, putative, expressed	0.439
LOC_Os08g28710.1	receptor protein kinase CRINKLY4 precursor, putative, expressed	LOC_Os05g46760.1	STE_MEKK_ste11_MAP3K.19 - STE kinases include homologs to sterile 7, sterile 11 and sterile 20 from yeast, expressed	0.439
LOC_Os09g26160.1	glutamate receptor, putative, expressed	LOC_Os06g19400.1	GRAM and C2 domains containing protein, putative, expressed	0.439
LOC_Os08g09200.1	aconitate hydratase protein, putative, expressed	LOC_Os07g34520.1	isocitrate lyase, putative, expressed	0.438
LOC_Os05g50380.1	glucose-1-phosphate adenylyltransferase large subunit, chloroplast precursor, putative, expressed	LOC_Os01g44120.1	expressed protein	0.436
LOC_Os05g01940.1	zinc finger, RING-type, putative, expressed	LOC_Os01g70790.1	SRC2 protein, putative, expressed	0.436
LOC_Os03g17700.1	CGMC_MAPKCGMC_2_ERK.2 - CGMC includes CDA, MAPK, GSK3, and CLKC kinases, expressed	LOC_Os02g08440.1	WRKY71, expressed	0.436
LOC_Os03g55320.1	protein phosphatase 2C, putative, expressed	LOC_Os03g49380.1	lipoxygenase, putative, expressed	0.436
LOC_Os05g39760.1	VHS and GAT domain containing protein, expressed	LOC_Os04g42980.1	zinc finger family protein, putative, expressed	0.436
LOC_Os10g41550.1	beta-amylase, putative, expressed	LOC_Os04g58190.1	dof zinc finger domain containing protein, putative, expressed	0.436
LOC_Os08g43170.1	hydroxymethylglutaryl-CoA synthase, putative, expressed	LOC_Os08g40180.1	3-hydroxy-3-methylglutaryl-coenzyme A reductase, putative, expressed	0.435
LOC_Os07g09670.1	galactosyltransferase family protein, putative, expressed	LOC_Os01g61080.1	WRKY24, expressed	0.434
LOC_Os03g48660.1	DUF1336 domain containing protein, expressed	LOC_Os01g63060.1	phosphatidic acid phosphatase-related, putative, expressed	0.434
LOC_Os08g09200.1	aconitate hydratase protein, putative, expressed	LOC_Os02g17390.1	3-hydroxyacyl-CoA dehydrogenase, putative, expressed	0.434
LOC_Os03g16690.1	oxysterol-binding protein, putative, expressed	LOC_Os02g41520.1	glycosyl transferase 8 domain containing protein, putative, expressed	0.434
LOC_Os07g09670.1	galactosyltransferase family protein, putative, expressed	LOC_Os02g50730.1	metalloendoproteinase 1 precursor, putative, expressed	0.434
LOC_Os07g09670.1	galactosyltransferase family protein, putative, expressed	LOC_Os03g08860.1	GRAM domain containing protein, expressed	0.434
LOC_Os04g52840.1	tyrosine protein kinase domain containing protein, putative, expressed	LOC_Os03g21030.1	no apical meristem protein, putative, expressed	0.434
LOC_Os08g28710.1	receptor protein kinase CRINKLY4 precursor, putative, expressed	LOC_Os03g57310.1	syntaxin, putative, expressed	0.434
LOC_Os11g31640.1	serine palmitoyltransferase 2, putative, expressed	LOC_Os04g42980.1	zinc finger family protein, putative, expressed	0.434
LOC_Os09g29940.1	auxin-independent growth promoter protein, putative, expressed	LOC_Os07g09670.1	galactosyltransferase family protein, putative, expressed	0.434
LOC_Os10g32680.1	expressed protein	LOC_Os09g26880.1	aldehyde dehydrogenase, putative, expressed	0.434
LOC_Os06g04280.1	3-phosphoshikimate 1-carboxyvinyltransferase, chloroplast precursor, putative, expressed	LOC_Os03g15780.1	anthranilate synthase component I-1, chloroplast precursor, putative, expressed	0.433
LOC_Os09g28354.1	CPuORF39 - conserved peptide uORF-containing transcript, expressed	LOC_Os01g04280.1	calmodulin binding protein, putative, expressed	0.432
LOC_Os05g01940.1	zinc finger, RING-type, putative, expressed	LOC_Os01g14440.1	WRKY1, expressed	0.432
LOC_Os05g46760.1	STE_MEKK_ste11_MAP3K.19 - STE kinases include homologs to sterile 7, sterile 11 and sterile 20 from yeast, expressed	LOC_Os01g55240.1	gibberellin 2-beta-dioxygenase, putative, expressed	0.432
LOC_Os09g39910.1	ABC transporter, ATP-binding protein, putative, expressed	LOC_Os01g70770.1	glutathione S-transferase, putative, expressed	0.432
LOC_Os03g49380.1	lipoxygenase, putative, expressed	LOC_Os02g45780.1	zinc finger, C3HC4 type domain containing protein, expressed	0.432
LOC_Os11g29870.1	WRKY72, expressed	LOC_Os02g50730.1	metalloendoproteinase 1 precursor, putative, expressed	0.432
LOC_Os03g17700.1	CGMC_MAPKCGMC_2_ERK.2 - CGMC includes CDA, MAPK, GSK3, and CLKC kinases, expressed	LOC_Os03g15770.2	tyrosine protein kinase domain containing protein, putative, expressed	0.432
LOC_Os05g47870.2	expressed protein	LOC_Os03g19650.3	PPR2, putative, expressed	0.432
LOC_Os01g50100.1	ABC transporter, ATP-binding protein, putative, expressed	LOC_Os01g14440.1	WRKY1, expressed	0.43
LOC_Os10g40550.2	CPuORF23 - conserved peptide uORF-containing transcript, expressed	LOC_Os01g43480.1	AAA-type ATPase family protein, putative, expressed	0.43
LOC_Os07g09680.1	ras-related protein, putative, expressed	LOC_Os01g63060.1	phosphatidic acid phosphatase-related, putative, expressed	0.43
LOC_Os08g38210.1	transcription factor BIM2, putative, expressed	LOC_Os01g70790.1	SRC2 protein, putative, expressed	0.43
LOC_Os05g47960.1	expressed protein	LOC_Os01g70790.1	SRC2 protein, putative, expressed	0.43
LOC_Os03g50280.1	GLTP domain containing protein, putative, expressed	LOC_Os02g51350.1	OsFBK10 - F-box domain and kelch repeat containing protein, expressed	0.43
LOC_Os06g49890.1	coiled-coil domain-containing protein 90A, mitochondrial precursor, putative, expressed	LOC_Os05g39930.1	spotted leaf 11, putative, expressed	0.43
LOC_Os09g38910.1	OsWAK92 - OsWAK receptor-like protein kinase, expressed	LOC_Os07g39520.1	STE_PAK_Ste20_Slob_Wnk.5 - STE kinases include homologs to sterile 7, sterile 11 and sterile 20 from yeast, expressed	0.43
LOC_Os02g50600.1	glycosyl transferase 8 domain containing protein, putative, expressed	LOC_Os01g04280.1	calmodulin binding protein, putative, expressed	0.429
LOC_Os03g08860.1	GRAM domain containing protein, expressed	LOC_Os01g18220.1	expressed protein	0.429
LOC_Os04g52840.1	tyrosine protein kinase domain containing protein, putative, expressed	LOC_Os01g58130.1	expressed protein	0.429
LOC_Os06g50930.1	rhodanese-like domain containing protein, putative, expressed	LOC_Os01g64520.1	uricase, putative, expressed	0.429
LOC_Os10g42690.1	jmjC domain containing protein, expressed	LOC_Os04g52840.1	tyrosine protein kinase domain containing protein, putative, expressed	0.429
LOC_Os07g38120.1	CAMK_CAMK_like.34 - CAMK includes calcium/calmodulin depedent protein kinases, expressed	LOC_Os05g25920.1	expressed protein	0.429
LOC_Os12g36110.1	calmodulin binding protein, putative, expressed	LOC_Os05g46760.1	STE_MEKK_ste11_MAP3K.19 - STE kinases include homologs to sterile 7, sterile 11 and sterile 20 from yeast, expressed	0.429
LOC_Os09g28354.1	CPuORF39 - conserved peptide uORF-containing transcript, expressed	LOC_Os06g44250.1	haemolysin-III, putative, expressed	0.429
LOC_Os10g42690.1	jmjC domain containing protein, expressed	LOC_Os07g09680.1	ras-related protein, putative, expressed	0.429
LOC_Os12g36110.1	calmodulin binding protein, putative, expressed	LOC_Os01g58130.1	expressed protein	0.427
LOC_Os10g42690.1	jmjC domain containing protein, expressed	LOC_Os01g61080.1	WRKY24, expressed	0.427
LOC_Os03g60650.1	protein phosphatase 2C, putative, expressed	LOC_Os01g62430.1	C2 domain containing protein, putative, expressed	0.427
LOC_Os07g39520.1	STE_PAK_Ste20_Slob_Wnk.5 - STE kinases include homologs to sterile 7, sterile 11 and sterile 20 from yeast, expressed	LOC_Os01g63060.1	phosphatidic acid phosphatase-related, putative, expressed	0.427
LOC_Os03g03164.2	homeobox protein knotted-1, putative, expressed	LOC_Os02g33000.1	glycosyl hydrolases family 17, putative, expressed	0.427
LOC_Os04g52840.1	tyrosine protein kinase domain containing protein, putative, expressed	LOC_Os02g45780.1	zinc finger, C3HC4 type domain containing protein, expressed	0.427
LOC_Os05g39720.1	WRKY70, expressed	LOC_Os03g21640.2	expressed protein	0.427
LOC_Os04g58190.1	dof zinc finger domain containing protein, putative, expressed	LOC_Os04g49450.1	MYB family transcription factor, putative, expressed	0.427
LOC_Os08g04340.1	plastocyanin-like domain containing protein, putative, expressed	LOC_Os05g39720.1	WRKY70, expressed	0.427
LOC_Os09g26780.1	zinc-finger protein, putative, expressed	LOC_Os05g51590.1	N-rich protein, putative, expressed	0.427
LOC_Os09g20480.1	transporter, putative, expressed	LOC_Os06g04880.1	serine threonine kinase, putative, expressed	0.427
LOC_Os03g17700.1	CGMC_MAPKCGMC_2_ERK.2 - CGMC includes CDA, MAPK, GSK3, and CLKC kinases, expressed	LOC_Os01g14440.1	WRKY1, expressed	0.424
LOC_Os03g13590.1	potyvirus VPg interacting protein, putative, expressed	LOC_Os01g54510.1	MAC/Perforin domain containing protein, putative, expressed	0.424
LOC_Os05g46760.1	STE_MEKK_ste11_MAP3K.19 - STE kinases include homologs to sterile 7, sterile 11 and sterile 20 from yeast, expressed	LOC_Os01g58130.1	expressed protein	0.424
LOC_Os08g39140.1	heat shock protein, putative, expressed	LOC_Os01g62290.1	DnaK family protein, putative, expressed	0.424
LOC_Os02g08440.1	WRKY71, expressed	LOC_Os01g70790.1	SRC2 protein, putative, expressed	0.424
LOC_Os05g03620.1	TKL_IRAK_CR4L.4 - The CR4L subfamily has homology with Crinkly4, expressed	LOC_Os01g70790.1	SRC2 protein, putative, expressed	0.424
LOC_Os06g44250.1	haemolysin-III, putative, expressed	LOC_Os03g08860.1	GRAM domain containing protein, expressed	0.424
LOC_Os06g04280.1	3-phosphoshikimate 1-carboxyvinyltransferase, chloroplast precursor, putative, expressed	LOC_Os04g38950.1	class I glutamine amidotransferase, putative, expressed	0.424
LOC_Os05g39930.1	spotted leaf 11, putative, expressed	LOC_Os04g52840.1	tyrosine protein kinase domain containing protein, putative, expressed	0.424
LOC_Os11g10480.1	dehydrogenase, putative, expressed	LOC_Os05g39310.1	thiamine pyrophosphate enzyme, C-terminal TPP binding domain containing protein, expressed	0.424
LOC_Os05g47960.1	expressed protein	LOC_Os05g39930.1	spotted leaf 11, putative, expressed	0.424
LOC_Os06g44010.1	WRKY28, expressed	LOC_Os05g46760.1	STE_MEKK_ste11_MAP3K.19 - STE kinases include homologs to sterile 7, sterile 11 and sterile 20 from yeast, expressed	0.424
LOC_Os09g29940.1	auxin-independent growth promoter protein, putative, expressed	LOC_Os06g44250.1	haemolysin-III, putative, expressed	0.424
LOC_Os09g27050.1	HD domain containing protein, putative, expressed	LOC_Os01g22900.1	neutral/alkaline invertase, putative, expressed	0.423
LOC_Os07g36560.1	transferase family protein, putative, expressed	LOC_Os01g50100.1	ABC transporter, ATP-binding protein, putative, expressed	0.423
LOC_Os07g09420.1	ATPase, putative, expressed	LOC_Os01g63060.1	phosphatidic acid phosphatase-related, putative, expressed	0.423
LOC_Os11g31640.1	serine palmitoyltransferase 2, putative, expressed	LOC_Os02g30230.2	exo70 exocyst complex subunit domain containing protein, expressed	0.423
LOC_Os10g42410.3	zinc-binding protein, putative, expressed	LOC_Os02g41520.1	glycosyl transferase 8 domain containing protein, putative, expressed	0.423
LOC_Os05g06990.1	TKL_IRAK_CrRLK1L-1.10 - The CrRLK1L-1 subfamily has homology to the CrRLK1L homolog, expressed	LOC_Os03g56060.1	CSLC9 - cellulose synthase-like family C, expressed	0.423
LOC_Os09g29940.1	auxin-independent growth promoter protein, putative, expressed	LOC_Os05g03620.1	TKL_IRAK_CR4L.4 - The CR4L subfamily has homology with Crinkly4, expressed	0.423
LOC_Os10g42690.1	jmjC domain containing protein, expressed	LOC_Os05g21180.2	phosphatidic acid phosphatase-related, putative, expressed	0.423
LOC_Os07g09670.1	galactosyltransferase family protein, putative, expressed	LOC_Os05g25920.1	expressed protein	0.423
LOC_Os09g04790.1	PAP fibrillin family domain containing protein, expressed	LOC_Os06g49640.1	uncharacterized UPF0114 domain containing protein, expressed	0.423
LOC_Os10g42690.1	jmjC domain containing protein, expressed	LOC_Os09g29940.1	auxin-independent growth promoter protein, putative, expressed	0.423
LOC_Os02g10070.2	citrate synthase, putative, expressed	LOC_Os01g42410.1	pleiotropic drug resistance protein, putative, expressed	0.42
LOC_Os04g52840.1	tyrosine protein kinase domain containing protein, putative, expressed	LOC_Os01g44120.1	expressed protein	0.42
LOC_Os07g36170.2	chitin-inducible gibberellin-responsive protein, putative, expressed	LOC_Os01g54510.1	MAC/Perforin domain containing protein, putative, expressed	0.42
LOC_Os12g36110.1	calmodulin binding protein, putative, expressed	LOC_Os01g55240.1	gibberellin 2-beta-dioxygenase, putative, expressed	0.42
LOC_Os02g45780.1	zinc finger, C3HC4 type domain containing protein, expressed	LOC_Os01g58130.1	expressed protein	0.42
LOC_Os12g32760.1	transporter family protein, putative, expressed	LOC_Os01g62810.1	regulator of chromosome condensation, putative, expressed	0.42
LOC_Os07g01370.1	peroxidase precursor, putative, expressed	LOC_Os01g65460.1	beta-galactosidase precursor, putative, expressed	0.42
LOC_Os03g21800.1	bZIP transcription factor family protein, putative, expressed	LOC_Os02g16909.2	dynein light chain type 1 domain containing protein, expressed	0.42
LOC_Os10g39670.1	protein kinase family protein, putative, expressed	LOC_Os02g40040.1	expressed protein	0.42
LOC_Os05g47960.1	expressed protein	LOC_Os02g45780.1	zinc finger, C3HC4 type domain containing protein, expressed	0.42
LOC_Os08g04630.1	external NADH-ubiquinone oxidoreductase 1, mitochondrial precursor, putative, expressed	LOC_Os03g08860.1	GRAM domain containing protein, expressed	0.42
LOC_Os08g28710.1	receptor protein kinase CRINKLY4 precursor, putative, expressed	LOC_Os03g17700.1	CGMC_MAPKCGMC_2_ERK.2 - CGMC includes CDA, MAPK, GSK3, and CLKC kinases, expressed	0.42
LOC_Os05g47960.1	expressed protein	LOC_Os03g17700.1	CGMC_MAPKCGMC_2_ERK.2 - CGMC includes CDA, MAPK, GSK3, and CLKC kinases, expressed	0.42
LOC_Os12g36110.1	calmodulin binding protein, putative, expressed	LOC_Os03g17700.1	CGMC_MAPKCGMC_2_ERK.2 - CGMC includes CDA, MAPK, GSK3, and CLKC kinases, expressed	0.42
LOC_Os09g38320.1	phytoene synthase, chloroplast precursor, putative, expressed	LOC_Os03g45280.1	dehydrin, putative, expressed	0.42
LOC_Os09g17152.1	OsFBX319 - F-box domain containing protein, expressed	LOC_Os03g57310.1	syntaxin, putative, expressed	0.42
LOC_Os09g38960.2	potassium transporter, putative, expressed	LOC_Os04g51820.2	OsHKT1;1 - Na+ transporter, expressed	0.42
LOC_Os11g07930.1	oxidoreductase, short chain dehydrogenase/reductase family domain containing family, expressed	LOC_Os05g34600.1	no apical meristem protein, putative, expressed	0.42
LOC_Os05g47960.1	expressed protein	LOC_Os01g14440.1	WRKY1, expressed	0.419
LOC_Os01g74370.1	domain of unknown function DUF966 domain containing protein, expressed	LOC_Os01g14440.1	WRKY1, expressed	0.419
LOC_Os01g58130.1	expressed protein	LOC_Os01g14440.1	WRKY1, expressed	0.419
LOC_Os01g70790.1	SRC2 protein, putative, expressed	LOC_Os01g61080.1	WRKY24, expressed	0.419
LOC_Os04g52840.1	tyrosine protein kinase domain containing protein, putative, expressed	LOC_Os01g62430.1	C2 domain containing protein, putative, expressed	0.419
LOC_Os03g21030.1	no apical meristem protein, putative, expressed	LOC_Os02g41520.1	glycosyl transferase 8 domain containing protein, putative, expressed	0.419
LOC_Os05g03620.1	TKL_IRAK_CR4L.4 - The CR4L subfamily has homology with Crinkly4, expressed	LOC_Os02g50600.1	glycosyl transferase 8 domain containing protein, putative, expressed	0.419
LOC_Os10g39100.1	uncharacterized Cys-rich domain containing protein, putative, expressed	LOC_Os02g50730.1	metalloendoproteinase 1 precursor, putative, expressed	0.419
LOC_Os09g04790.1	PAP fibrillin family domain containing protein, expressed	LOC_Os03g03450.1	anthranilate phosphoribosyltransferase, chloroplast precursor, putative, expressed	0.419
LOC_Os05g21180.2	phosphatidic acid phosphatase-related, putative, expressed	LOC_Os03g21030.1	no apical meristem protein, putative, expressed	0.419
LOC_Os04g57310.1	thiol-disulphide oxidoreductase DCC, putative, expressed	LOC_Os03g49630.1	expressed protein	0.419
LOC_Os05g25920.1	expressed protein	LOC_Os04g52840.1	tyrosine protein kinase domain containing protein, putative, expressed	0.419
LOC_Os07g09670.1	galactosyltransferase family protein, putative, expressed	LOC_Os05g46760.1	STE_MEKK_ste11_MAP3K.19 - STE kinases include homologs to sterile 7, sterile 11 and sterile 20 from yeast, expressed	0.419
LOC_Os09g04790.1	PAP fibrillin family domain containing protein, expressed	LOC_Os08g29170.1	dehydrogenase, putative, expressed	0.419
LOC_Os07g09420.1	ATPase, putative, expressed	LOC_Os01g44120.1	expressed protein	0.417
LOC_Os07g29750.1	glycosyl hydrolases family 16, putative, expressed	LOC_Os01g47400.1	OsMan01 - Endo-Beta-Mannanase, expressed	0.417
LOC_Os01g74370.1	domain of unknown function DUF966 domain containing protein, expressed	LOC_Os01g61080.1	WRKY24, expressed	0.417
LOC_Os05g46760.1	STE_MEKK_ste11_MAP3K.19 - STE kinases include homologs to sterile 7, sterile 11 and sterile 20 from yeast, expressed	LOC_Os01g62430.1	C2 domain containing protein, putative, expressed	0.417
LOC_Os03g17700.1	CGMC_MAPKCGMC_2_ERK.2 - CGMC includes CDA, MAPK, GSK3, and CLKC kinases, expressed	LOC_Os01g70790.1	SRC2 protein, putative, expressed	0.417
LOC_Os07g09670.1	galactosyltransferase family protein, putative, expressed	LOC_Os02g50600.1	glycosyl transferase 8 domain containing protein, putative, expressed	0.417
LOC_Os05g46760.1	STE_MEKK_ste11_MAP3K.19 - STE kinases include homologs to sterile 7, sterile 11 and sterile 20 from yeast, expressed	LOC_Os03g15770.2	tyrosine protein kinase domain containing protein, putative, expressed	0.417
LOC_Os05g49300.1	iron-sulfur cluster assembly enzyme ISCU, mitochondrial precursor, putative, expressed	LOC_Os03g31180.1	diacylglycerol kinase 1, putative, expressed	0.417
LOC_Os08g01390.1	phosphatidylinositol-4-phosphate 5-Kinase, putative, expressed	LOC_Os07g04220.1	wound and phytochrome signaling involved receptor like kinase, putative, expressed	0.417
LOC_Os01g57570.1	NADPH-dependent FMN reductase domain containing protein, expressed	LOC_Os01g13690.1	ligA, putative, expressed	0.414
LOC_Os07g09680.1	ras-related protein, putative, expressed	LOC_Os01g14440.1	WRKY1, expressed	0.414
LOC_Os03g21640.2	expressed protein	LOC_Os01g14440.1	WRKY1, expressed	0.414
LOC_Os02g50730.1	metalloendoproteinase 1 precursor, putative, expressed	LOC_Os01g42380.1	pleiotropic drug resistance protein, putative, expressed	0.414
LOC_Os04g52840.1	tyrosine protein kinase domain containing protein, putative, expressed	LOC_Os01g55240.1	gibberellin 2-beta-dioxygenase, putative, expressed	0.414
LOC_Os01g63060.1	phosphatidic acid phosphatase-related, putative, expressed	LOC_Os01g61080.1	WRKY24, expressed	0.414
LOC_Os03g15770.2	tyrosine protein kinase domain containing protein, putative, expressed	LOC_Os01g62430.1	C2 domain containing protein, putative, expressed	0.414
LOC_Os05g04360.1	protein phosphatase 2C, putative, expressed	LOC_Os02g41520.1	glycosyl transferase 8 domain containing protein, putative, expressed	0.414
LOC_Os05g46760.1	STE_MEKK_ste11_MAP3K.19 - STE kinases include homologs to sterile 7, sterile 11 and sterile 20 from yeast, expressed	LOC_Os02g45780.1	zinc finger, C3HC4 type domain containing protein, expressed	0.414
LOC_Os07g09670.1	galactosyltransferase family protein, putative, expressed	LOC_Os02g51350.1	OsFBK10 - F-box domain and kelch repeat containing protein, expressed	0.414
LOC_Os03g48660.1	DUF1336 domain containing protein, expressed	LOC_Os03g16480.1	zinc finger family protein, putative, expressed	0.414
LOC_Os04g52840.1	tyrosine protein kinase domain containing protein, putative, expressed	LOC_Os03g21640.2	expressed protein	0.414
LOC_Os04g58190.1	dof zinc finger domain containing protein, putative, expressed	LOC_Os04g37690.1	RNA recognition motif containing protein, putative, expressed	0.414
LOC_Os09g37012.1	eukaryotic aspartyl protease domain containing protein, expressed	LOC_Os06g09390.1	AP2 domain containing protein, expressed	0.414
LOC_Os08g38210.1	transcription factor BIM2, putative, expressed	LOC_Os01g14440.1	WRKY1, expressed	0.413
LOC_Os03g49380.1	lipoxygenase, putative, expressed	LOC_Os01g58130.1	expressed protein	0.413
LOC_Os08g38210.1	transcription factor BIM2, putative, expressed	LOC_Os01g62430.1	C2 domain containing protein, putative, expressed	0.413
LOC_Os04g52840.1	tyrosine protein kinase domain containing protein, putative, expressed	LOC_Os02g50730.1	metalloendoproteinase 1 precursor, putative, expressed	0.413
LOC_Os06g44250.1	haemolysin-III, putative, expressed	LOC_Os02g51350.1	OsFBK10 - F-box domain and kelch repeat containing protein, expressed	0.413
LOC_Os10g42690.1	jmjC domain containing protein, expressed	LOC_Os03g08860.1	GRAM domain containing protein, expressed	0.413
LOC_Os03g16690.1	oxysterol-binding protein, putative, expressed	LOC_Os03g08860.1	GRAM domain containing protein, expressed	0.413
LOC_Os07g09680.1	ras-related protein, putative, expressed	LOC_Os04g52840.1	tyrosine protein kinase domain containing protein, putative, expressed	0.413
LOC_Os10g42690.1	jmjC domain containing protein, expressed	LOC_Os05g03620.1	TKL_IRAK_CR4L.4 - The CR4L subfamily has homology with Crinkly4, expressed	0.413
LOC_Os07g09680.1	ras-related protein, putative, expressed	LOC_Os05g21180.2	phosphatidic acid phosphatase-related, putative, expressed	0.413
LOC_Os03g33580.1	mitotic checkpoint protein, putative, expressed	LOC_Os01g02020.1	acetyl-CoA acetyltransferase, cytosolic, putative, expressed	0.411
LOC_Os06g44250.1	haemolysin-III, putative, expressed	LOC_Os01g14440.1	WRKY1, expressed	0.411
LOC_Os02g50730.1	metalloendoproteinase 1 precursor, putative, expressed	LOC_Os01g44120.1	expressed protein	0.411
LOC_Os08g04340.1	plastocyanin-like domain containing protein, putative, expressed	LOC_Os01g55240.1	gibberellin 2-beta-dioxygenase, putative, expressed	0.411
LOC_Os07g38120.1	CAMK_CAMK_like.34 - CAMK includes calcium/calmodulin depedent protein kinases, expressed	LOC_Os01g61080.1	WRKY24, expressed	0.411
LOC_Os02g51350.1	OsFBK10 - F-box domain and kelch repeat containing protein, expressed	LOC_Os01g70790.1	SRC2 protein, putative, expressed	0.411
LOC_Os03g28310.1	dnaJ domain containing protein, expressed	LOC_Os02g40040.1	expressed protein	0.411
LOC_Os08g09200.1	aconitate hydratase protein, putative, expressed	LOC_Os08g01390.1	phosphatidylinositol-4-phosphate 5-Kinase, putative, expressed	0.411
LOC_Os05g21180.2	phosphatidic acid phosphatase-related, putative, expressed	LOC_Os01g07120.1	AP2 domain containing protein, expressed	0.408
LOC_Os08g28710.1	receptor protein kinase CRINKLY4 precursor, putative, expressed	LOC_Os01g14440.1	WRKY1, expressed	0.408
LOC_Os07g48550.1	no apical meristem protein, putative, expressed	LOC_Os01g42380.1	pleiotropic drug resistance protein, putative, expressed	0.408
LOC_Os02g52780.1	bZIP transcription factor, putative, expressed	LOC_Os01g56180.1	expressed protein	0.408
LOC_Os01g72460.1	NADPH quinone oxidoreductase, putative, expressed	LOC_Os01g70770.1	glutathione S-transferase, putative, expressed	0.408
LOC_Os05g25920.1	expressed protein	LOC_Os01g70790.1	SRC2 protein, putative, expressed	0.408
LOC_Os05g04360.1	protein phosphatase 2C, putative, expressed	LOC_Os02g34600.1	CAMK_CAMK_like.13 - CAMK includes calcium/calmodulin depedent protein kinases, expressed	0.408
LOC_Os05g34600.1	no apical meristem protein, putative, expressed	LOC_Os02g45054.1	ZOS2-15 - C2H2 zinc finger protein, expressed	0.408
LOC_Os03g08860.1	GRAM domain containing protein, expressed	LOC_Os02g51350.1	OsFBK10 - F-box domain and kelch repeat containing protein, expressed	0.408
LOC_Os03g51920.1	peptidase, M50 family, putative, expressed	LOC_Os02g54600.1	STE_MEK_ste7_MAP2K.5 - STE kinases include homologs to sterile 7, sterile 11 and sterile 20 from yeast, expressed	0.408
LOC_Os05g46760.1	STE_MEKK_ste11_MAP3K.19 - STE kinases include homologs to sterile 7, sterile 11 and sterile 20 from yeast, expressed	LOC_Os03g09170.1	ethylene-responsive transcription factor, putative, expressed	0.408
LOC_Os06g44250.1	haemolysin-III, putative, expressed	LOC_Os03g17700.1	CGMC_MAPKCGMC_2_ERK.2 - CGMC includes CDA, MAPK, GSK3, and CLKC kinases, expressed	0.408
LOC_Os08g04630.1	external NADH-ubiquinone oxidoreductase 1, mitochondrial precursor, putative, expressed	LOC_Os06g44250.1	haemolysin-III, putative, expressed	0.408
LOC_Os05g50380.1	glucose-1-phosphate adenylyltransferase large subunit, chloroplast precursor, putative, expressed	LOC_Os01g22900.1	neutral/alkaline invertase, putative, expressed	0.407
LOC_Os04g52840.1	tyrosine protein kinase domain containing protein, putative, expressed	LOC_Os03g15770.2	tyrosine protein kinase domain containing protein, putative, expressed	0.406
LOC_Os09g38960.2	potassium transporter, putative, expressed	LOC_Os01g10890.1	CAMK_KIN1/SNF1/Nim1_like.8 - CAMK includes calcium/calmodulin depedent protein kinases, expressed	0.404
LOC_Os03g08860.1	GRAM domain containing protein, expressed	LOC_Os01g14440.1	WRKY1, expressed	0.404
LOC_Os05g50100.1	expressed protein	LOC_Os01g42380.1	pleiotropic drug resistance protein, putative, expressed	0.404
LOC_Os03g48660.1	DUF1336 domain containing protein, expressed	LOC_Os01g44120.1	expressed protein	0.404
LOC_Os02g45780.1	zinc finger, C3HC4 type domain containing protein, expressed	LOC_Os01g55240.1	gibberellin 2-beta-dioxygenase, putative, expressed	0.404
LOC_Os05g25920.1	expressed protein	LOC_Os01g58130.1	expressed protein	0.404
LOC_Os08g04340.1	plastocyanin-like domain containing protein, putative, expressed	LOC_Os01g61080.1	WRKY24, expressed	0.404
LOC_Os05g50100.1	expressed protein	LOC_Os01g61080.1	WRKY24, expressed	0.404
LOC_Os10g42690.1	jmjC domain containing protein, expressed	LOC_Os01g70790.1	SRC2 protein, putative, expressed	0.404
LOC_Os05g39930.1	spotted leaf 11, putative, expressed	LOC_Os03g09170.1	ethylene-responsive transcription factor, putative, expressed	0.404
LOC_Os08g28710.1	receptor protein kinase CRINKLY4 precursor, putative, expressed	LOC_Os03g15770.2	tyrosine protein kinase domain containing protein, putative, expressed	0.404
LOC_Os03g57310.1	syntaxin, putative, expressed	LOC_Os03g17700.1	CGMC_MAPKCGMC_2_ERK.2 - CGMC includes CDA, MAPK, GSK3, and CLKC kinases, expressed	0.404
LOC_Os08g29170.1	dehydrogenase, putative, expressed	LOC_Os03g19650.3	PPR2, putative, expressed	0.404
LOC_Os04g51970.2	synaptic vesicle 2-related protein, putative, expressed	LOC_Os03g21640.2	expressed protein	0.404
LOC_Os10g41550.1	beta-amylase, putative, expressed	LOC_Os04g49450.1	MYB family transcription factor, putative, expressed	0.404
LOC_Os12g05690.1	expressed protein	LOC_Os05g01940.1	zinc finger, RING-type, putative, expressed	0.404
LOC_Os08g04630.1	external NADH-ubiquinone oxidoreductase 1, mitochondrial precursor, putative, expressed	LOC_Os05g03620.1	TKL_IRAK_CR4L.4 - The CR4L subfamily has homology with Crinkly4, expressed	0.404
LOC_Os05g50380.1	glucose-1-phosphate adenylyltransferase large subunit, chloroplast precursor, putative, expressed	LOC_Os05g25920.1	expressed protein	0.404
LOC_Os07g09680.1	ras-related protein, putative, expressed	LOC_Os05g25920.1	expressed protein	0.404
LOC_Os11g31640.1	serine palmitoyltransferase 2, putative, expressed	LOC_Os05g39760.1	VHS and GAT domain containing protein, expressed	0.404
LOC_Os06g21380.1	OsCttP3 - Putative C-terminal processing peptidase homologue, expressed	LOC_Os05g49300.1	iron-sulfur cluster assembly enzyme ISCU, mitochondrial precursor, putative, expressed	0.404
LOC_Os11g29870.1	WRKY72, expressed	LOC_Os05g50100.1	expressed protein	0.404
LOC_Os10g39100.1	uncharacterized Cys-rich domain containing protein, putative, expressed	LOC_Os05g50100.1	expressed protein	0.404
LOC_Os07g07470.1	transketolase, putative, expressed	LOC_Os06g01630.5	2-oxo acid dehydrogenases acyltransferase domain containing protein, expressed	0.404
LOC_Os07g38120.1	CAMK_CAMK_like.34 - CAMK includes calcium/calmodulin depedent protein kinases, expressed	LOC_Os06g44250.1	haemolysin-III, putative, expressed	0.404
LOC_Os11g05990.1	digalactosyldiacylglycerol synthase, chloroplast precursor, putative, expressed	LOC_Os08g04840.1	MYB family transcription factor, putative, expressed	0.404
LOC_Os09g38320.1	phytoene synthase, chloroplast precursor, putative, expressed	LOC_Os03g59040.1	squalene synthetase, putative, expressed	0.403
LOC_Os07g39520.1	STE_PAK_Ste20_Slob_Wnk.5 - STE kinases include homologs to sterile 7, sterile 11 and sterile 20 from yeast, expressed	LOC_Os01g09800.1	BTBA1 - Bric-a-Brac,Tramtrack, Broad Complex BTB domain with Ankyrin repeat region, expressed	0.4
LOC_Os05g25920.1	expressed protein	LOC_Os01g50100.1	ABC transporter, ATP-binding protein, putative, expressed	0.4
LOC_Os05g47960.1	expressed protein	LOC_Os01g55240.1	gibberellin 2-beta-dioxygenase, putative, expressed	0.4
LOC_Os10g25230.1	ZIM domain containing protein, putative, expressed	LOC_Os01g62430.1	C2 domain containing protein, putative, expressed	0.4
LOC_Os03g05310.1	pheophorbide a oxygenase, chloroplast precursor, putative, expressed	LOC_Os01g70490.1	potassium transporter, putative, expressed	0.4
LOC_Os11g31640.1	serine palmitoyltransferase 2, putative, expressed	LOC_Os02g34600.1	CAMK_CAMK_like.13 - CAMK includes calcium/calmodulin depedent protein kinases, expressed	0.4
LOC_Os12g36110.1	calmodulin binding protein, putative, expressed	LOC_Os02g45780.1	zinc finger, C3HC4 type domain containing protein, expressed	0.4
LOC_Os12g32760.1	transporter family protein, putative, expressed	LOC_Os02g46030.1	MYB family transcription factor, putative, expressed	0.4
LOC_Os03g49380.1	lipoxygenase, putative, expressed	LOC_Os03g21030.1	no apical meristem protein, putative, expressed	0.4
LOC_Os06g44010.1	WRKY28, expressed	LOC_Os03g49380.1	lipoxygenase, putative, expressed	0.4
LOC_Os11g29870.1	WRKY72, expressed	LOC_Os04g08550.1	oxidoreductase, aldo/keto reductase family protein, putative, expressed	0.4
LOC_Os05g48690.1	transcription factor like protein, putative, expressed	LOC_Os04g35560.1	glutathione S-transferase, putative, expressed	0.4
LOC_Os06g44250.1	haemolysin-III, putative, expressed	LOC_Os05g50100.1	expressed protein	0.4
LOC_Os08g38210.1	transcription factor BIM2, putative, expressed	LOC_Os06g44010.1	WRKY28, expressed	0.4
LOC_Os08g38210.1	transcription factor BIM2, putative, expressed	LOC_Os08g04630.1	external NADH-ubiquinone oxidoreductase 1, mitochondrial precursor, putative, expressed	0.4
LOC_Os10g42690.1	jmjC domain containing protein, expressed	LOC_Os08g38210.1	transcription factor BIM2, putative, expressed	0.4
