# Supplementary material for: Bioinformatic Analysis of Epigenetic and MicroRNA Mediated Regulation of Drought Responsive Genes in Rice
Source: PLoS One. 2012 Nov 8;7(11):e49331. doi: 10.1371/journal.pone.0049331 (PMC3493535; doi:10.1371/journal.pone.0049331)
Supplement: Table S7 — Distribution of pFAM domain families in the nine clusters. (XLSX) [file pone.0049331.s009.xlsx]

## Sheet: Table-S7
Table S7. Distribution of pFAM domain families in the nine clusters
Domain family distribution	MSUv7	D	NE	E	NED	NEU	ED	EU	DD	DU
Retrotrans_gag	2713	1	1	0	1	0	0	0	1	0
zf-CCHC	1300	4	2	2	2	0	1	1	3	1
Pkinase	1144	182	44	138	23	21	69	69	92	90
Transposase_21	941	1	0	1	0	0	1	0	1	0
Chromo	899	1	0	1	0	0	1	0	1	0
MULE	593	1	1	0	1	0	0	0	1	0
LRR_1	545	87	24	63	14	10	48	15	62	25
NB-ARC	522	32	9	23	6	3	15	8	21	11
PPR	478	37	9	28	7	2	23	5	30	7
Peptidase_C48	462	3	2	1	0	2	1	0	1	2
Pkinase_Tyr	428	78	22	56	10	12	33	23	43	35
F-box	383	34	11	23	4	7	13	10	17	17
p450	372	62	14	48	10	4	32	16	42	20
LRRNT_2	347	56	14	42	8	6	33	9	41	15
zf-C3HC4	325	63	23	40	6	17	14	26	20	43
RRM_1	260	39	12	27	8	4	16	11	24	15
Myb_DNA-binding	235	51	18	33	7	11	19	14	26	25
WD40	218	29	7	22	5	2	15	7	20	9
hATC	217	1	0	1	0	0	1	0	1	0
UDPGT	199	24	8	16	4	4	6	10	10	14
peroxidase	160	36	17	19	14	3	9	10	23	13
DUF295	160	4	2	2	1	1	1	1	2	2
AP2	159	37	14	23	2	12	7	16	9	28
Ank	145	24	9	15	6	3	9	6	15	9
BTB	145	6	1	5	0	1	1	4	1	5
Helicase_C	142	17	4	13	3	1	9	4	12	5
NAM	141	30	17	13	3	14	5	8	8	22
Transferase	139	18	6	12	2	4	4	8	6	12
HLH	134	28	10	18	4	6	8	10	12	16
B_lectin	134	17	6	11	4	2	8	3	12	5
Exo_endo_phos	123	6	2	4	1	1	2	2	3	3
DUF1618	123	7	2	5	1	1	4	1	5	2
ABC_tran	121	28	3	25	2	1	13	12	15	13
Lipase_GDSL	120	32	12	20	8	4	16	4	24	8
AAA	119	24	11	13	4	7	7	6	11	13
FAR1	119	1	1	0	1	0	0	0	1	0
S_locus_glycop	114	17	6	11	4	2	8	3	12	5
2OG-FeII_Oxy	111	26	6	20	1	5	7	13	8	18
DUF594	111	7	2	5	2	0	5	0	7	0
DnaJ	107	18	10	8	6	4	3	5	9	9
adh_short	107	21	11	10	7	4	6	4	13	8
Tryp_alpha_amyl	103	21	12	9	9	3	6	3	15	6
WRKY	102	21	4	17	2	2	5	12	7	14
Lectin_legB	102	11	1	10	1	0	8	2	9	2
efhand	97	26	10	16	4	6	3	13	7	19
Asp	94	17	6	11	2	4	5	6	7	10
Sugar_tr	94	21	6	15	4	2	9	6	13	8
Homeobox	92	23	11	12	5	6	6	6	11	12
DEAD	91	14	5	9	4	1	6	3	10	4
PAN_2	90	14	5	9	3	2	6	3	9	5
PP2C	86	29	9	20	2	7	3	17	5	24
C2	86	20	6	14	2	4	6	8	8	12
PTR2	86	18	3	15	3	0	11	4	14	4
B3	85	12	4	8	2	2	4	4	6	6
DUF1668	85	2	0	2	0	0	0	2	0	2
bZIP_1	84	24	9	15	1	8	6	9	7	17
Epimerase	83	31	8	23	3	5	13	10	16	15
Abhydrolase_1	83	21	9	12	7	2	4	8	11	10
EamA	80	23	7	16	7	0	13	3	20	3
DUF889	80	1	0	1	0	0	1	0	1	0
DUF26	79	11	4	7	2	2	4	3	6	5
Transposase_24	77	1	1	0	1	0	0	0	1	0
U-box	76	16	7	9	3	4	3	6	6	10
GST_N	76	13	8	5	5	3	3	2	8	5
DUF247	76	3	1	2	1	0	1	1	2	1
GST_C	73	12	7	5	4	3	3	2	7	5
Pollen_allerg_1	73	14	7	7	4	3	5	2	9	5
HMA	72	19	6	13	2	4	7	6	9	10
Glyco_hydro_17	70	26	10	16	3	7	8	8	11	15
PMEI	70	11	6	5	5	1	1	4	6	5
SRF-TF	70	18	0	18	0	0	14	4	14	4
Aa_trans	69	20	8	12	6	2	6	6	12	8
Abhydrolase_3	68	18	7	11	3	4	2	9	5	13
Cupin_1	68	16	5	11	3	2	5	6	8	8
MATH	68	3	1	2	1	0	0	2	1	2
PA	67	7	1	6	1	0	3	3	4	3
ubiquitin	66	14	8	6	5	3	3	3	8	6
LEA_2	65	12	7	5	2	5	1	4	3	9
DPBB_1	65	17	9	8	5	4	6	2	11	6
Hydrolase	64	16	4	12	2	2	5	7	7	9
Mito_carr	63	11	3	8	1	2	2	6	3	8
DUF231	63	5	1	4	1	0	3	1	4	1
Dirigent	62	10	5	5	4	1	3	2	7	3
Peptidase_S8	62	5	1	4	1	0	3	1	4	1
Cu_bind_like	61	13	7	6	3	4	2	4	5	8
Auxin_inducible	60	8	3	5	3	0	2	3	5	3
GRAS	60	6	1	5	0	1	2	3	2	4
Peptidase_S10	60	15	1	14	1	0	11	3	12	3
Inhibitor_I9	59	4	1	3	1	0	2	1	3	1
Ras	58	18	5	13	2	3	6	7	8	10
Metallophos	58	16	3	13	2	1	7	6	9	7
Thioredoxin	58	11	4	7	1	3	4	3	5	6
FBD	57	1	1	0	0	1	0	0	0	1
MatE	56	15	2	13	1	1	9	4	10	5
TPR_1	56	14	3	11	1	2	8	3	9	5
DUF3615	54	3	0	3	0	0	2	1	2	1
Inhibitor_I29	54	11	3	8	2	1	7	1	9	2
Peptidase_C1	54	11	3	8	2	1	7	1	9	2
EGF_CA	53	4	1	3	1	0	2	1	3	1
Lipase_3	52	7	2	5	0	2	1	4	1	6
AUX_IAA	52	9	2	7	0	2	4	3	4	5
ABC2_membrane	51	11	1	10	0	1	3	7	3	8
MFS_1	51	14	2	12	0	2	5	7	5	9
PHD	51	8	3	5	2	1	2	3	4	4
Exo70	50	6	1	5	0	1	3	2	3	3
Terpene_synth_C	50	13	2	11	2	0	9	2	11	2
Histone	50	13	0	13	0	0	13	0	13	0
TPT	49	12	5	7	3	2	4	3	7	5
UQ_con	49	8	2	6	0	2	5	1	5	3
Usp	48	16	8	8	2	6	0	8	2	14
IQ	48	12	3	9	2	1	5	4	7	5
Cu-oxidase_2	48	12	1	11	1	0	8	3	9	3
Cu-oxidase_3	48	12	1	11	1	0	8	3	9	3
Kinesin	48	11	2	9	1	1	6	3	7	4
Terpene_synth	48	12	1	11	1	0	9	2	10	2
Pollen_Ole_e_I	48	12	7	5	6	1	4	1	10	2
X8	47	15	4	11	1	3	6	5	7	8
Cu-oxidase	47	12	1	11	1	0	8	3	9	3
Cyclin_N	47	10	3	7	2	1	6	1	8	2
Pectinesterase	46	10	4	6	2	2	2	4	4	6
zf-CCCH	46	7	3	4	0	3	0	4	0	7
ADH_zinc_N	46	12	2	10	1	1	8	2	9	3
AMP-binding	46	11	3	8	1	2	6	2	7	4
Glyco_hydro_28	45	9	3	6	2	1	1	5	3	6
ABC_membrane	45	12	1	11	1	0	8	3	9	3
UCH	45	4	1	3	1	0	2	1	3	1
E1-E2_ATPase	44	7	1	6	1	0	1	5	2	5
Glutaredoxin	43	8	3	5	2	1	2	3	4	4
Methyltransf_2	43	5	1	4	1	0	2	2	3	2
SNF2_N	43	3	0	3	0	0	2	1	2	1
Thaumatin	43	4	2	2	0	2	1	1	1	3
Glyco_transf_8	42	10	2	8	0	2	3	5	3	7
Malectin	42	9	1	8	1	0	5	3	6	3
SET	42	2	0	2	0	0	2	0	2	0
Arm	41	9	3	6	1	2	2	4	3	6
CCT	41	11	0	11	0	0	7	4	7	4
DUF588	41	13	4	9	4	0	6	3	10	3
CAP	41	6	3	3	2	1	2	1	4	2
Exostosin	41	5	2	3	2	0	2	1	4	1
Methyltransf_7	41	4	1	3	1	0	2	1	3	1
Glycos_transf_1	40	12	3	9	2	1	6	3	8	4
ADH_N	40	11	2	9	1	1	7	2	8	3
Response_reg	40	7	1	6	0	1	4	2	4	3
VQ	40	6	4	2	1	3	1	1	2	4
NAF	39	15	4	11	2	2	3	8	5	10
Aminotran_1_2	39	8	4	4	3	1	1	3	4	4
Glyco_hydro_1	39	13	3	10	2	1	7	3	9	4
K-box	39	15	0	15	0	0	12	3	12	3
MIP	38	12	4	8	2	2	7	1	9	3
DUF239	38	3	1	2	1	0	2	0	3	0
Methyltransf_11	37	10	1	9	1	0	5	4	6	4
HSP20	37	8	4	4	1	3	1	3	2	6
FAD_binding_4	37	10	3	7	1	2	5	2	6	4
Sulfotransfer_1	37	3	1	2	1	0	0	2	1	2
RIP	37	1	0	1	0	0	0	1	0	1
DUF538	37	5	4	1	1	3	1	0	2	3
Acetyltransf_1	36	6	1	5	1	0	3	2	4	2
Dimerisation	36	5	1	4	1	0	2	2	3	2
DUF260	36	6	3	3	0	3	1	2	1	5
Glyco_hydro_18	36	12	8	4	3	5	3	1	6	6
Kelch_1	35	3	1	2	1	0	1	1	2	1
CBS	34	10	4	6	4	0	2	4	6	4
DUF241	34	4	3	1	1	2	0	1	1	3
Chal_sti_synt_N	34	3	1	2	0	1	2	0	2	1
Cyclin_C	34	7	3	4	2	1	4	0	6	1
GTP_EFTU	34	7	1	6	1	0	6	0	7	0
Galactosyl_T	33	5	1	4	0	1	1	3	1	4
O-FucT	33	8	3	5	2	1	3	2	5	3
FMO-like	33	5	3	2	2	1	1	1	3	2
PB1	33	2	1	1	1	0	0	1	1	1
Cellulose_synt	33	12	4	8	2	2	8	0	10	2
mTERF	33	5	3	2	3	0	2	0	5	0
HSP70	32	9	1	8	0	1	4	4	4	5
Glyco_hydro_16	32	11	3	8	1	2	5	3	6	5
HATPase_c	32	10	0	10	0	0	7	3	7	3
Cpn60_TCP1	32	7	0	7	0	0	5	2	5	2
ACT	32	9	4	5	3	1	4	1	7	2
Branch	31	9	4	5	1	3	1	4	2	7
DUF623	31	3	0	3	0	0	1	2	1	2
Aldo_ket_red	30	8	1	7	1	0	4	3	5	3
K_trans	30	8	3	5	1	2	2	3	3	5
XET_C	30	11	3	8	1	2	5	3	6	5
zf-Dof	30	9	4	5	1	3	2	3	3	6
FKBP_C	30	7	1	6	1	0	4	2	5	2
zf-DHHC	30	4	0	4	0	0	3	1	3	1
Jacalin	30	6	3	3	0	3	3	0	3	3
Skp1	30	3	2	1	2	0	1	0	3	0
CRAL_TRIO	29	7	3	4	2	1	3	1	5	2
DUF581	29	11	6	5	4	2	4	1	8	3
CBFD_NFYB_HMF	29	2	0	2	0	0	2	0	2	0
Chal_sti_synt_C	29	3	1	2	0	1	2	0	2	1
DUF248	29	9	0	9	0	0	9	0	9	0
GTP_EFTU_D2	29	5	0	5	0	0	5	0	5	0
OPT	29	1	1	0	1	0	0	0	1	0
Pro_isomerase	29	4	0	4	0	0	4	0	4	0
Pyr_redox_2	28	6	1	5	0	1	1	4	1	5
Trehalose_PPase	28	8	4	4	0	4	0	4	0	8
FAE1_CUT1_RppA	28	7	2	5	1	1	4	1	5	2
AA_permease	28	2	0	2	0	0	2	0	2	0
DUF296	28	1	1	0	0	1	0	0	0	1
GATA	28	3	1	2	1	0	2	0	3	0
Na_H_Exchanger	28	3	2	1	0	2	1	0	1	2
IBR	27	5	0	5	0	0	1	4	1	4
Auxin_resp	27	2	0	2	0	0	1	1	1	1
PLAC8	27	5	2	3	0	2	2	1	2	3
cNMP_binding	27	3	3	0	3	0	0	0	3	0
MMR_HSR1	27	5	3	2	2	1	2	0	4	1
DUF563	26	12	3	9	1	2	3	6	4	8
START	26	6	0	6	0	0	3	3	3	3
HALZ	26	8	5	3	0	5	1	2	1	7
KH_1	26	5	1	4	1	0	3	1	4	1
Skp1_POZ	26	3	2	1	2	0	1	0	3	0
HSF_DNA-bind	25	10	5	5	0	5	1	4	1	9
Acyltransferase	25	4	0	4	0	0	1	3	1	3
Fasciclin	25	12	6	6	6	0	4	2	10	2
RCC1	25	4	1	3	0	1	1	2	1	3
Glyco_hydro_9	25	5	0	5	0	0	5	0	5	0
PAZ	25	2	0	2	0	0	2	0	2	0
Pyr_redox	24	5	1	4	0	1	1	3	1	4
SNARE	24	6	1	5	1	0	3	2	4	2
ACP_syn_III_C	24	6	2	4	1	1	3	1	4	2
CRAL_TRIO_N	24	6	3	3	2	1	2	1	4	2
Proteasome	24	3	2	1	1	1	0	1	1	2
Tim17	24	3	1	2	0	1	1	1	1	2
Amino_oxidase	23	4	0	4	0	0	2	2	2	2
Arf	23	3	1	2	1	0	0	2	1	2
FBA_3	23	3	0	3	0	0	1	2	1	2
VWA	23	5	2	3	1	1	1	2	2	3
Chloroa_b-bind	23	14	8	6	6	2	6	0	12	2
NmrA	23	12	3	9	1	2	9	0	10	2
NUDIX	23	5	3	2	1	2	2	0	3	2
Bromodomain	22	6	0	6	0	0	2	4	2	4
Calmodulin_bind	22	4	0	4	0	0	0	4	0	4
DUF567	22	4	3	1	0	3	0	1	0	4
FA_hydroxylase	22	6	4	2	1	3	1	1	2	4
DUF630	22	1	0	1	0	0	1	0	1	0
DUF632	22	1	0	1	0	0	1	0	1	0
LSM	22	9	3	6	3	0	6	0	9	0
Serpin	22	1	0	1	0	0	1	0	1	0
tify	21	7	3	4	1	2	0	4	1	6
UBA	21	5	0	5	0	0	2	3	2	3
Cation_ATPase_N	21	4	1	3	1	0	1	2	2	2
MtN3_slv	21	6	3	3	2	1	1	2	3	3
NIF	21	3	0	3	0	0	1	2	1	2
DnaJ_C	21	2	1	1	0	1	0	1	0	2
ECH	21	4	1	3	0	1	2	1	2	2
Mem_trans	21	3	1	2	1	0	1	1	2	1
SBP_bac_3	21	6	0	6	0	0	5	1	5	1
TCP	21	2	1	1	1	0	0	1	1	1
Tetraspannin	21	6	3	3	0	3	2	1	2	4
DUF1218	21	2	1	1	1	0	1	0	2	0
Piwi	21	2	0	2	0	0	2	0	2	0
Str_synth	21	2	0	2	0	0	2	0	2	0
WRC	21	1	0	1	0	0	1	0	1	0
Aldedh	20	9	2	7	0	2	3	4	3	6
PBP	20	6	1	5	0	1	2	3	2	4
Remorin_C	20	7	2	5	0	2	2	3	2	5
Glycos_transf_2	20	4	1	3	1	0	1	2	2	2
Reticulon	20	9	6	3	4	2	1	2	5	4
Sina	20	3	1	2	0	1	0	2	0	3
BRCT	20	3	0	3	0	0	2	1	2	1
Ion_trans	20	3	2	1	2	0	0	1	2	1
PALP	20	9	3	6	1	2	5	1	6	3
Rhodanese	20	8	4	4	4	0	3	1	7	1
XG_FTase	20	1	0	1	0	0	0	1	0	1
DSPc	20	3	1	2	1	0	2	0	3	0
PGAM	20	3	1	2	1	0	2	0	3	0
Rep_fac-A_C	20	2	2	0	2	0	0	0	2	0
Patatin	19	8	4	4	1	3	1	3	2	6
Pribosyltran	19	6	1	5	0	1	2	3	2	4
CAF1	19	2	0	2	0	0	0	2	0	2
Cytochrom_B561	19	8	3	5	2	1	3	2	5	3
dsrm	19	1	0	1	0	0	0	1	0	1
FHA	19	4	0	4	0	0	3	1	3	1
Lig_chan	19	6	0	6	0	0	5	1	5	1
Motile_Sperm	19	5	2	3	2	0	2	1	4	1
Mov34	19	3	2	1	2	0	0	1	2	1
PORR	19	6	1	5	1	0	4	1	5	1
SBP	19	2	0	2	0	0	1	1	1	1
TBC	19	3	1	2	1	0	1	1	2	1
ATP-synt_ab	19	2	1	1	1	0	1	0	2	0
DUF1785	19	2	0	2	0	0	2	0	2	0
DUF3778	19	2	2	0	2	0	0	0	2	0
DUF679	19	2	1	1	0	1	1	0	1	1
FYVE	19	1	1	0	0	1	0	0	0	1
PBD	19	6	2	4	2	0	4	0	6	0
PIP5K	18	4	0	4	0	0	1	3	1	3
zf-B_box	18	10	1	9	1	0	6	3	7	3
DUF584	18	5	2	3	0	2	1	2	1	4
PI3_PI4_kinase	18	3	1	2	0	1	0	2	0	3
Cyt-b5	18	6	3	3	2	1	2	1	4	2
FAD_binding_3	18	3	1	2	1	0	1	1	2	1
Fer2	18	4	0	4	0	0	3	1	3	1
Zip	18	5	4	1	4	0	0	1	4	1
BURP	18	5	2	3	2	0	3	0	5	0
FH2	18	1	0	1	0	0	1	0	1	0
Nodulin-like	18	2	1	1	1	0	1	0	2	0
zf-RanBP	18	1	0	1	0	0	1	0	1	0
CCT_2	17	6	2	4	0	2	0	4	0	6
PDR_assoc	17	6	0	6	0	0	2	4	2	4
Cellulase	17	6	1	5	1	0	2	3	3	3
GRAM	17	5	2	3	1	1	0	3	1	4
Lipoxygenase	17	6	0	6	0	0	3	3	3	3
zf-AN1	17	4	1	3	0	1	1	2	1	3
Actin	17	4	2	2	1	1	1	1	2	2
DUF1677	17	3	1	2	1	0	1	1	2	1
Nucleotid_trans	17	1	0	1	0	0	0	1	0	1
3_5_exonuc	17	3	1	2	1	0	2	0	3	0
ANTH	17	4	2	2	0	2	2	0	2	2
ATP-synt_ab_C	17	2	1	1	1	0	1	0	2	0
DUF3355	17	1	0	1	0	0	1	0	1	0
Glyco_hydro_19	17	4	4	0	1	3	0	0	1	3
HEAT	17	1	0	1	0	0	1	0	1	0
Med26	17	2	1	1	0	1	1	0	1	1
PH	17	3	0	3	0	0	3	0	3	0
Polyketide_cyc2	17	3	3	0	3	0	0	0	3	0
TPR_2	17	2	0	2	0	0	2	0	2	0
Hydrolase_4	16	7	1	6	0	1	1	5	1	6
LACT	16	9	2	7	2	0	4	3	6	3
GATase	16	5	0	5	0	0	3	2	3	2
Glyco_hydro_3	16	5	1	4	1	0	2	2	3	2
Glyco_hydro_3_C	16	5	1	4	1	0	2	2	3	2
Glyco_hydro_35	16	7	1	6	1	0	4	2	5	2
Na_Ca_ex	16	4	0	4	0	0	2	2	2	2
Peptidase_M24	16	4	1	3	1	0	1	2	2	2
Pyridoxal_deC	16	3	0	3	0	0	1	2	1	2
Snf7	16	3	0	3	0	0	1	2	1	2
TB2_DP1_HVA22	16	4	1	3	0	1	1	2	1	3
Dynamin_N	16	2	0	2	0	0	1	1	1	1
LysM	16	2	1	1	0	1	0	1	0	2
NAD_binding_1	16	5	1	4	0	1	3	1	3	2
NTP_transf_2	16	1	0	1	0	0	0	1	0	1
potato_inhibit	16	2	1	1	1	0	0	1	1	1
ArfGap	16	2	0	2	0	0	2	0	2	0
DUF1605	16	1	0	1	0	0	1	0	1	0
DUF569	16	1	0	1	0	0	1	0	1	0
DUF593	16	2	2	0	0	2	0	0	0	2
EMP70	16	7	1	6	1	0	6	0	7	0
HA2	16	1	0	1	0	0	1	0	1	0
Peptidase_S9	16	3	1	2	1	0	2	0	3	0
RALF	16	2	1	1	1	0	1	0	2	0
Tubulin	16	9	2	7	2	0	7	0	9	0
PLAT	15	6	0	6	0	0	3	3	3	3
PLDc	15	4	1	3	0	1	0	3	0	4
Exonuc_X-T	15	3	0	3	0	0	1	2	1	2
2-Hacid_dh	15	4	2	2	2	0	1	1	3	1
2-Hacid_dh_C	15	4	2	2	2	0	1	1	3	1
Acid_phosphat_B	15	3	1	2	1	0	1	1	2	1
ANF_receptor	15	6	0	6	0	0	5	1	5	1
Clp_N	15	3	2	1	1	1	0	1	1	2
ClpB_D2-small	15	3	2	1	1	1	0	1	1	2
DUF1645	15	4	3	1	1	2	0	1	1	3
Hist_deacetyl	15	5	0	5	0	0	4	1	4	1
JmjC	15	2	0	2	0	0	1	1	1	1
KOW	15	4	2	2	2	0	1	1	3	1
Peptidase_M16_C	15	1	0	1	0	0	0	1	0	1
PFK	15	4	1	3	1	0	2	1	3	1
PfkB	15	4	2	2	0	2	1	1	1	3
PLATZ	15	2	1	1	1	0	0	1	1	1
Rhomboid	15	6	3	3	1	2	2	1	3	3
RPE65	15	5	2	3	1	1	2	1	3	2
Tub	15	2	1	1	0	1	0	1	0	2
ABC1	15	3	1	2	0	1	2	0	2	1
ATP-synt_ab_N	15	2	1	1	1	0	1	0	2	0
C1_3	15	3	1	2	1	0	2	0	3	0
DUF3475	15	1	1	0	0	1	0	0	0	1
DUF868	15	2	1	1	0	1	1	0	1	1
PUF	15	1	0	1	0	0	1	0	1	0
S4	15	3	1	2	1	0	2	0	3	0
UBX	15	1	1	0	0	1	0	0	0	1
ZF-HD_dimer	15	2	2	0	1	1	0	0	1	1
DAGK_cat	14	3	0	3	0	0	0	3	0	3
SPX	14	6	1	5	0	1	2	3	2	4
AA_kinase	14	5	0	5	0	0	3	2	3	2
Alpha-amylase	14	6	1	5	0	1	3	2	3	3
Cation_ATPase_C	14	2	0	2	0	0	0	2	0	2
GMC_oxred_C	14	4	1	3	1	0	1	2	2	2
Xan_ur_permease	14	7	3	4	2	1	2	2	4	3
AAA_2	14	3	2	1	1	1	0	1	1	2
AhpC-TSA	14	3	1	2	1	0	1	1	2	1
DUF547	14	3	0	3	0	0	2	1	2	1
GH3	14	5	1	4	1	0	3	1	4	1
Glyco_hydro_10	14	3	1	2	1	0	1	1	2	1
KIP1	14	3	0	3	0	0	2	1	2	1
Lactamase_B	14	5	1	4	1	0	3	1	4	1
OTU	14	2	0	2	0	0	1	1	1	1
Peptidase_M16	14	1	0	1	0	0	0	1	0	1
Proteasome_A_N	14	1	0	1	0	0	0	1	0	1
zf-MYND	14	3	1	2	1	0	1	1	2	1
Ammonium_transp	14	1	0	1	0	0	1	0	1	0
AvrRpt-cleavage	14	2	1	1	1	0	1	0	2	0
CLP_protease	14	2	1	1	1	0	1	0	2	0
CRS1_YhbY	14	1	0	1	0	0	1	0	1	0
DLH	14	2	0	2	0	0	2	0	2	0
DUF640	14	1	0	1	0	0	1	0	1	0
DUF642	14	1	1	0	0	1	0	0	0	1
DUF827	14	4	3	1	3	0	1	0	4	0
Glyco_transf_43	14	3	1	2	0	1	2	0	2	1
Methyltransf_16	14	1	1	0	1	0	0	0	1	0
Nramp	14	6	4	2	3	1	2	0	5	1
Peptidase_M20	14	1	0	1	0	0	1	0	1	0
POX	14	2	0	2	0	0	2	0	2	0
PsbP	14	5	3	2	2	1	2	0	4	1
Radical_SAM	14	2	1	1	1	0	1	0	2	0
S1	14	4	1	3	1	0	3	0	4	0
Aminotran_3	13	3	0	3	0	0	1	2	1	2
Biotin_lipoyl	13	3	0	3	0	0	1	2	1	2
Myosin_head	13	3	0	3	0	0	1	2	1	2
Phi_1	13	4	2	2	0	2	0	2	0	4
PLD_C	13	3	1	2	0	1	0	2	0	3
polyprenyl_synt	13	5	1	4	1	0	2	2	3	2
zf-A20	13	4	1	3	0	1	1	2	1	3
ADK	13	7	1	6	0	1	5	1	5	2
Aldose_epim	13	3	1	2	0	1	1	1	1	2
BBE	13	4	1	3	1	0	2	1	3	1
Carb_anhydrase	13	2	0	2	0	0	1	1	1	1
DAO	13	2	0	2	0	0	1	1	1	1
Dynamin_M	13	2	0	2	0	0	1	1	1	1
ELK	13	5	2	3	2	0	2	1	4	1
Glucan_synthase	13	2	0	2	0	0	1	1	1	1
HisKA	13	3	0	3	0	0	2	1	2	1
KNOX1	13	4	1	3	1	0	2	1	3	1
PRA1	13	1	0	1	0	0	0	1	0	1
PRONE	13	1	0	1	0	0	0	1	0	1
PRT_C	13	2	1	1	1	0	0	1	1	1
ThiF	13	3	0	3	0	0	2	1	2	1
TPP_enzyme_N	13	1	0	1	0	0	0	1	0	1
TRAM_LAG1_CLN8	13	3	1	2	0	1	1	1	1	2
Adaptin_N	13	2	0	2	0	0	2	0	2	0
Cullin	13	1	1	0	1	0	0	0	1	0
DUF1637	13	1	1	0	0	1	0	0	0	1
DUF573	13	2	2	0	1	1	0	0	1	1
DUF617	13	1	1	0	1	0	0	0	1	0
DUF668	13	1	1	0	0	1	0	0	0	1
EFG_C	13	1	0	1	0	0	1	0	1	0
Gamma-thionin	13	1	1	0	0	1	0	0	0	1
Ribosomal_L7Ae	13	4	1	3	1	0	3	0	4	0
Synaptobrevin	13	2	2	0	1	1	0	0	1	1
tRNA_anti	13	3	3	0	3	0	0	0	3	0
tRNA-synt_1	13	3	0	3	0	0	3	0	3	0
Tubulin_C	13	8	2	6	2	0	6	0	8	0
Lysine_decarbox	12	5	0	5	0	0	1	4	1	4
SNARE_assoc	12	6	2	4	0	2	1	3	1	5
DUF506	12	2	0	2	0	0	0	2	0	2
Gal_Lectin	12	5	0	5	0	0	3	2	3	2
Glyoxalase	12	5	1	4	0	1	2	2	2	3
GMC_oxred_N	12	4	1	3	1	0	1	2	2	2
Oxidored_FMN	12	3	1	2	0	1	0	2	0	3
STAS	12	4	1	3	1	0	1	2	2	2
Sulfate_transp	12	4	1	3	1	0	1	2	2	2
Transket_pyr	12	4	2	2	1	1	0	2	1	3
DnaJ_CXXCXGXG	12	1	0	1	0	0	0	1	0	1
KNOX2	12	4	1	3	1	0	2	1	3	1
Ldh_1_C	12	5	1	4	1	0	3	1	4	1
Ldh_1_N	12	5	1	4	1	0	3	1	4	1
Mlo	12	3	1	2	0	1	1	1	1	2
NTP_transferase	12	3	2	1	1	1	0	1	1	2
zf-CW	12	2	0	2	0	0	1	1	1	1
Clat_adaptor_s	12	2	1	1	0	1	1	0	1	1
CTP_transf_2	12	1	1	0	1	0	0	0	1	0
DUF566	12	4	4	0	3	1	0	0	3	1
GDA1_CD39	12	3	3	0	3	0	0	0	3	0
La	12	1	1	0	1	0	0	0	1	0
NAD_binding_4	12	2	0	2	0	0	2	0	2	0
PAM2	12	1	1	0	0	1	0	0	0	1
Pec_lyase_C	12	3	1	2	0	1	2	0	2	1
Prenyltrans	12	1	1	0	1	0	0	0	1	0
QLQ	12	1	0	1	0	0	1	0	1	0
RhoGAP	12	5	2	3	2	0	3	0	5	0
Ribosomal_60s	12	3	2	1	2	0	1	0	3	0
SWIB	12	1	0	1	0	0	1	0	1	0
YTH	12	1	1	0	0	1	0	0	0	1
DUF221	11	8	2	6	0	2	1	5	1	7
Glyco_hydro_14	11	6	1	5	0	1	1	4	1	5
Glyco_transf_20	11	5	2	3	0	2	0	3	0	5
Bowman-Birk_leg	11	6	4	2	1	3	0	2	1	5
CBFB_NFYA	11	5	0	5	0	0	3	2	3	2
CXC	11	2	0	2	0	0	0	2	0	2
DUF3133	11	3	1	2	1	0	0	2	1	2
DUF803	11	3	0	3	0	0	1	2	1	2
FAD_binding_8	11	5	1	4	0	1	2	2	2	3
Ferric_reduct	11	5	1	4	0	1	2	2	2	3
GASA	11	5	2	3	0	2	1	2	1	4
GHMP_kinases_N	11	3	0	3	0	0	1	2	1	2
HMG_box	11	7	0	7	0	0	5	2	5	2
NAD_binding_6	11	5	1	4	0	1	2	2	2	3
Rieske	11	2	0	2	0	0	0	2	0	2
Ald_Xan_dh_C2	11	2	0	2	0	0	1	1	1	1
CH	11	3	2	1	1	1	0	1	1	2
COBRA	11	2	0	2	0	0	1	1	1	1
Dev_Cell_Death	11	1	0	1	0	0	0	1	0	1
DIL	11	1	0	1	0	0	0	1	0	1
DUF1336	11	4	2	2	0	2	1	1	1	3
DUF3444	11	2	0	2	0	0	1	1	1	1
DUF604	11	2	0	2	0	0	1	1	1	1
DUF688	11	4	2	2	1	1	1	1	2	2
GED	11	1	0	1	0	0	0	1	0	1
Glyco_hydro_32N	11	3	1	2	0	1	1	1	1	2
Glyco_transf_5	11	3	0	3	0	0	2	1	2	1
MAP65_ASE1	11	4	0	4	0	0	3	1	3	1
PAP2	11	3	2	1	0	2	0	1	0	3
PAS	11	4	0	4	0	0	3	1	3	1
Sucrose_synth	11	4	0	4	0	0	3	1	3	1
zf-C2H2_jaz	11	3	0	3	0	0	2	1	2	1
3Beta_HSD	11	2	1	1	1	0	1	0	2	0
Anticodon_1	11	3	0	3	0	0	3	0	3	0
Cyclin	11	1	0	1	0	0	1	0	1	0
Cystatin	11	1	1	0	0	1	0	0	0	1
DUF1070	11	1	1	0	1	0	0	0	1	0
DUF3339	11	6	5	1	4	1	1	0	5	1
DUF620	11	2	1	1	0	1	1	0	1	1
DUF707	11	2	1	1	0	1	1	0	1	1
GDPD	11	3	3	0	2	1	0	0	2	1
IBN_N	11	2	0	2	0	0	2	0	2	0
Kelch_2	11	1	0	1	0	0	1	0	1	0
Linker_histone	11	2	0	2	0	0	2	0	2	0
M20_dimer	11	1	0	1	0	0	1	0	1	0
MBOAT	11	2	1	1	1	0	1	0	2	0
Metallothio_2	11	4	3	1	3	0	1	0	4	0
PAN_1	11	2	1	1	1	0	1	0	2	0
PWWP	11	2	1	1	1	0	1	0	2	0
Ribosomal_S7	11	1	0	1	0	0	1	0	1	0
SAP	11	1	0	1	0	0	1	0	1	0
tRNA-synt_2b	11	3	1	2	1	0	2	0	3	0
XS	11	2	1	1	1	0	1	0	2	0
ZZ	11	1	0	1	0	0	1	0	1	0
DUF761	10	5	1	4	0	1	0	4	0	5
Raffinose_syn	10	5	0	5	0	0	1	4	1	4
BSD	10	3	0	3	0	0	1	2	1	2
Cation_efflux	10	5	1	4	1	0	2	2	3	2
DUF1639	10	5	2	3	2	0	1	2	3	2
GAT	10	2	0	2	0	0	0	2	0	2
Gelsolin	10	4	2	2	2	0	0	2	2	2
NADPH_Ox	10	6	1	5	0	1	3	2	3	3
Transketolase_C	10	4	2	2	1	1	0	2	1	3
VHS	10	2	0	2	0	0	0	2	0	2
2-oxoacid_dh	10	1	0	1	0	0	0	1	0	1
Aminotran_4	10	3	1	2	0	1	1	1	1	2
B56	10	2	0	2	0	0	1	1	1	1
Bet_v_1	10	3	2	1	2	0	0	1	2	1
Copine	10	3	1	2	0	1	1	1	1	2
Cytokin-bind	10	2	1	1	0	1	0	1	0	2
dCMP_cyt_deam_1	10	3	1	2	0	1	1	1	1	2
DUF3774	10	1	0	1	0	0	0	1	0	1
DUF789	10	3	2	1	1	1	0	1	1	2
FA_desaturase	10	4	1	3	1	0	2	1	3	1
FBA_1	10	2	1	1	1	0	0	1	1	1
Gal-bind_lectin	10	1	0	1	0	0	0	1	0	1
Glyco_hydro_32C	10	3	1	2	0	1	1	1	1	2
MA3	10	4	1	3	1	0	2	1	3	1
MORN	10	2	0	2	0	0	1	1	1	1
Syntaxin	10	2	0	2	0	0	1	1	1	1
TPP_enzyme_M	10	1	0	1	0	0	0	1	0	1
UPF0057	10	2	1	1	0	1	0	1	0	2
Voltage_CLC	10	2	1	1	1	0	0	1	1	1
ALMT	10	1	1	0	1	0	0	0	1	0
ALO	10	2	1	1	0	1	1	0	1	1
Aminotran_5	10	1	1	0	1	0	0	0	1	0
Annexin	10	1	1	0	0	1	0	0	0	1
AOX	10	1	1	0	0	1	0	0	0	1
Asparaginase_2	10	1	0	1	0	0	1	0	1	0
Chitin_bind_1	10	4	3	1	0	3	1	0	1	3
CS	10	3	2	1	0	2	1	0	1	2
DUF2921	10	1	1	0	1	0	0	0	1	0
DUF3594	10	3	2	1	2	0	1	0	3	0
DUF3675	10	3	3	0	1	2	0	0	1	2
DUF862	10	1	1	0	0	1	0	0	0	1
EMP24_GP25L	10	2	0	2	0	0	2	0	2	0
FAD_binding_6	10	2	0	2	0	0	2	0	2	0
GTP_EFTU_D3	10	2	0	2	0	0	2	0	2	0
Hexokinase_1	10	1	1	0	0	1	0	0	0	1
Hexokinase_2	10	1	1	0	0	1	0	0	0	1
Ist1	10	1	1	0	0	1	0	0	0	1
LIM	10	4	3	1	1	2	1	0	2	2
Lung_7-TM_R	10	1	1	0	1	0	0	0	1	0
MIF4G	10	3	1	2	1	0	2	0	3	0
PAE	10	2	2	0	1	1	0	0	1	1
PAL	10	2	1	1	0	1	1	0	1	1
PDT	10	1	1	0	0	1	0	0	0	1
Peptidase_M41	10	1	1	0	0	1	0	0	0	1
PK	10	3	2	1	2	0	1	0	3	0
PK_C	10	3	2	1	2	0	1	0	3	0
PP-binding	10	3	1	2	1	0	2	0	3	0
Ribosomal_L14	10	2	2	0	2	0	0	0	2	0
Ribosomal_S11	10	2	2	0	2	0	0	0	2	0
SLR1-BP	10	1	1	0	1	0	0	0	1	0
TPX2	10	3	2	1	2	0	1	0	3	0
tRNA-synt_1b	10	1	0	1	0	0	1	0	1	0
UbiA	10	1	1	0	1	0	0	0	1	0
Cofilin_ADF	9	6	2	4	1	1	1	3	2	4
Caleosin	9	5	1	4	0	1	2	2	2	3
CaM_binding	9	3	0	3	0	0	1	2	1	2
DUF3403	9	3	1	2	0	1	0	2	0	3
PAP_fibrillin	9	3	1	2	1	0	0	2	1	2
Alpha-amyl_C2	9	4	0	4	0	0	3	1	3	1
CaATP_NAI	9	1	0	1	0	0	0	1	0	1
Cys_Met_Meta_PP	9	2	0	2	0	0	1	1	1	1
DDT	9	1	0	1	0	0	0	1	0	1
DUF1644	9	2	1	1	0	1	0	1	0	2
DUF3411	9	3	1	2	0	1	1	1	1	2
DUF3741	9	2	0	2	0	0	1	1	1	1
DUF936	9	2	0	2	0	0	1	1	1	1
EIN3	9	2	1	1	0	1	0	1	0	2
HSP90	9	4	0	4	0	0	3	1	3	1
PRK	9	2	0	2	0	0	1	1	1	1
TPP_enzyme_C	9	1	0	1	0	0	0	1	0	1
C4dic_mal_tran	9	2	2	0	0	2	0	0	0	2
DUF3511	9	1	0	1	0	0	1	0	1	0
FA_desaturase_2	9	2	2	0	2	0	0	0	2	0
GRP	9	2	2	0	2	0	0	0	2	0
Inositol_P	9	2	1	1	1	0	1	0	2	0
MCM	9	5	2	3	2	0	3	0	5	0
NAD_binding_2	9	1	0	1	0	0	1	0	1	0
NOP5NT	9	3	1	2	1	0	2	0	3	0
Rad51	9	1	1	0	1	0	0	0	1	0
Ribonuclease_3	9	1	1	0	1	0	0	0	1	0
SAM_decarbox	9	2	1	1	0	1	1	0	1	1
SapB_1	9	2	1	1	1	0	1	0	2	0
Sterile	9	1	0	1	0	0	1	0	1	0
UVR	9	2	2	0	2	0	0	0	2	0
XH	9	1	1	0	1	0	0	0	1	0
zf-C2H2	9	1	0	1	0	0	1	0	1	0
DUF1423	8	4	0	4	0	0	0	4	0	4
HD	8	4	0	4	0	0	0	4	0	4
Acyl-CoA_dh_1	8	5	1	4	0	1	1	3	1	4
Acyl-CoA_dh_M	8	4	1	3	0	1	0	3	0	4
DAGK_acc	8	3	0	3	0	0	0	3	0	3
HECT	8	4	1	3	0	1	0	3	0	4
Invertase_neut	8	4	1	3	0	1	0	3	0	4
RelA_SpoT	8	4	0	4	0	0	1	3	1	3
14-3-3	8	5	1	4	0	1	2	2	2	3
BT1	8	2	0	2	0	0	0	2	0	2
DUF676	8	3	0	3	0	0	1	2	1	2
E1_dh	8	3	1	2	0	1	0	2	0	3
PaO	8	2	0	2	0	0	0	2	0	2
Bac_surface_Ag	8	2	0	2	0	0	1	1	1	1
CorA	8	1	0	1	0	0	0	1	0	1
CUE	8	1	0	1	0	0	0	1	0	1
DUF828	8	3	1	2	1	0	1	1	2	1
E3_binding	8	1	0	1	0	0	0	1	0	1
GAF	8	3	0	3	0	0	2	1	2	1
Glycolytic	8	3	1	2	1	0	1	1	2	1
Iso_dh	8	3	2	1	0	2	0	1	0	3
LisH	8	1	0	1	0	0	0	1	0	1
PAP_assoc	8	1	0	1	0	0	0	1	0	1
PX	8	2	1	1	1	0	0	1	1	1
Ribonuclease_T2	8	6	2	4	1	1	3	1	4	2
Ribosomal_L40e	8	5	3	2	3	0	1	1	4	1
Syja_N	8	2	0	2	0	0	1	1	1	1
UPF0005	8	1	0	1	0	0	0	1	0	1
YABBY	8	1	0	1	0	0	0	1	0	1
Abi	8	1	1	0	0	1	0	0	0	1
Alpha-L-AF_C	8	1	0	1	0	0	1	0	1	0
BAG	8	1	0	1	0	0	1	0	1	0
bZIP_2	8	3	3	0	1	2	0	0	1	2
CLASP_N	8	2	0	2	0	0	2	0	2	0
CN_hydrolase	8	1	0	1	0	0	1	0	1	0
CTP_transf_1	8	1	1	0	1	0	0	0	1	0
Cullin_Nedd8	8	1	1	0	1	0	0	0	1	0
DNA_methylase	8	1	0	1	0	0	1	0	1	0
DNA_photolyase	8	2	2	0	1	1	0	0	1	1
DOMON	8	2	0	2	0	0	2	0	2	0
DUF3354	8	2	2	0	2	0	0	0	2	0
DUF869	8	3	0	3	0	0	3	0	3	0
DVL	8	1	1	0	0	1	0	0	0	1
E2F_TDP	8	1	0	1	0	0	1	0	1	0
HGTP_anticodon	8	3	1	2	1	0	2	0	3	0
HIT	8	2	0	2	0	0	2	0	2	0
LON	8	1	0	1	0	0	1	0	1	0
Mpv17_PMP22	8	3	2	1	2	0	1	0	3	0
MutS_V	8	2	0	2	0	0	2	0	2	0
NAC	8	3	1	2	1	0	2	0	3	0
Peptidase_S24	8	1	1	0	1	0	0	0	1	0
Porin_3	8	2	0	2	0	0	2	0	2	0
Pyrophosphatase	8	4	1	3	0	1	3	0	3	1
Ribosomal_L18e	8	1	0	1	0	0	1	0	1	0
Ribosomal_S15	8	2	1	1	1	0	1	0	2	0
RNase_PH	8	2	1	1	1	0	1	0	2	0
S6PP	8	2	0	2	0	0	2	0	2	0
SapB_2	8	2	1	1	1	0	1	0	2	0
UAA	8	1	0	1	0	0	1	0	1	0
VIT1	8	1	1	0	1	0	0	0	1	0
zf-Tim10_DDP	8	4	3	1	3	0	1	0	4	0
zf-UBP	8	1	1	0	1	0	0	0	1	0
MACPF	7	5	0	5	0	0	1	4	1	4
Dehydrin	7	7	4	3	0	4	0	3	0	7
malic	7	5	0	5	0	0	2	3	2	3
Di19	7	4	2	2	1	1	0	2	1	3
GATase_2	7	3	0	3	0	0	1	2	1	2
AWPM-19	7	2	1	1	0	1	0	1	0	2
CBM_20	7	3	1	2	1	0	1	1	2	1
Chalcone	7	5	3	2	2	1	1	1	3	2
Cu_amine_oxid	7	1	0	1	0	0	0	1	0	1
Cu_amine_oxidN2	7	1	0	1	0	0	0	1	0	1
DUF1084	7	1	0	1	0	0	0	1	0	1
DUF3474	7	3	1	2	1	0	1	1	2	1
DUF3755	7	1	0	1	0	0	0	1	0	1
DUF568	7	2	1	1	0	1	0	1	0	2
DUF966	7	2	1	1	1	0	0	1	1	1
Dynein_light	7	3	1	2	0	1	1	1	1	2
GLTP	7	3	2	1	2	0	0	1	2	1
Glyco_hydro_31	7	2	0	2	0	0	1	1	1	1
JmjN	7	2	0	2	0	0	1	1	1	1
PD40	7	1	0	1	0	0	0	1	0	1
PDZ	7	1	0	1	0	0	0	1	0	1
Peptidase_M1	7	1	0	1	0	0	0	1	0	1
PH_2	7	3	1	2	1	0	1	1	2	1
Pkinase_C	7	2	1	1	0	1	0	1	0	2
RRM_2	7	1	0	1	0	0	0	1	0	1
Sec1	7	1	0	1	0	0	0	1	0	1
SMP	7	2	1	1	0	1	0	1	0	2
SNase	7	4	2	2	2	0	1	1	3	1
TFIIB	7	1	0	1	0	0	0	1	0	1
Tmemb_14	7	2	1	1	1	0	0	1	1	1
TrkH	7	4	2	2	2	0	1	1	3	1
V-SNARE_C	7	1	0	1	0	0	0	1	0	1
Wax2_C	7	2	0	2	0	0	1	1	1	1
zf-CHY	7	2	1	1	0	1	0	1	0	2
A_thal_3526	7	2	1	1	1	0	1	0	2	0
AIG1	7	1	0	1	0	0	1	0	1	0
APH	7	2	1	1	0	1	1	0	1	1
Bap31	7	1	1	0	0	1	0	0	0	1
Brix	7	1	1	0	1	0	0	0	1	0
Cpn10	7	4	2	2	2	0	2	0	4	0
Ctr	7	1	1	0	1	0	0	0	1	0
DUF579	7	1	1	0	1	0	0	0	1	0
DUF810	7	1	1	0	0	1	0	0	0	1
DUF914	7	1	0	1	0	0	1	0	1	0
EFG_IV	7	1	0	1	0	0	1	0	1	0
ELMO_CED12	7	2	1	1	0	1	1	0	1	1
ENOD93	7	4	4	0	0	4	0	0	0	4
FAD_binding_7	7	1	1	0	0	1	0	0	0	1
Gp_dh_C	7	4	1	3	1	0	3	0	4	0
Gp_dh_N	7	4	1	3	1	0	3	0	4	0
GYF	7	1	0	1	0	0	1	0	1	0
H_PPase	7	2	0	2	0	0	2	0	2	0
KAP	7	2	1	1	1	0	1	0	2	0
NAP	7	2	0	2	0	0	2	0	2	0
NTF2	7	2	0	2	0	0	2	0	2	0
PEPcase	7	1	0	1	0	0	1	0	1	0
Plant_zn_clust	7	3	2	1	0	2	1	0	1	2
PsbQ	7	1	1	0	1	0	0	0	1	0
PTPLA	7	1	0	1	0	0	1	0	1	0
Pyr_redox_dim	7	2	1	1	0	1	1	0	1	1
RF-1	7	2	0	2	0	0	2	0	2	0
Ribosomal_L10	7	3	2	1	2	0	1	0	3	0
Ribosomal_S14	7	1	1	0	1	0	0	0	1	0
RNA_pol_Rpb2_6	7	1	0	1	0	0	1	0	1	0
RNA_pol_Rpb2_7	7	1	0	1	0	0	1	0	1	0
RNase_PH_C	7	1	0	1	0	0	1	0	1	0
Rubis-subs-bind	7	1	0	1	0	0	1	0	1	0
TFIIS_C	7	3	2	1	1	1	1	0	2	1
UDPG_MGDP_dh	7	2	0	2	0	0	2	0	2	0
zf-HIT	7	1	0	1	0	0	1	0	1	0
zf-LSD1	7	1	0	1	0	0	1	0	1	0
zf-XS	7	1	0	1	0	0	1	0	1	0
DUF821	6	3	0	3	0	0	0	3	0	3
Malic_M	6	5	0	5	0	0	2	3	2	3
Acyl-ACP_TE	6	2	0	2	0	0	0	2	0	2
DUF3420	6	2	0	2	0	0	0	2	0	2
DUF3700	6	3	0	3	0	0	1	2	1	2
eIF-5_eIF-2B	6	3	0	3	0	0	1	2	1	2
Endosulfine	6	3	1	2	1	0	0	2	1	2
FMN_red	6	3	0	3	0	0	1	2	1	2
GDI	6	2	0	2	0	0	0	2	0	2
SPOC	6	2	0	2	0	0	0	2	0	2
SQS_PSY	6	2	0	2	0	0	0	2	0	2
SRP54	6	3	1	2	1	0	0	2	1	2
SRP54_N	6	3	1	2	1	0	0	2	1	2
W2	6	2	0	2	0	0	0	2	0	2
Ald_Xan_dh_C	6	1	0	1	0	0	0	1	0	1
BAR	6	3	0	3	0	0	2	1	2	1
BRO1	6	3	1	2	0	1	1	1	1	2
CBM_4_9	6	1	0	1	0	0	0	1	0	1
CBM_48	6	2	1	1	0	1	0	1	0	2
CO_deh_flav_C	6	1	0	1	0	0	0	1	0	1
CTP_synth_N	6	2	0	2	0	0	1	1	1	1
Cu_amine_oxidN3	6	1	0	1	0	0	0	1	0	1
DJ-1_PfpI	6	3	0	3	0	0	2	1	2	1
DUF1624	6	2	1	1	1	0	0	1	1	1
DUF1685	6	2	0	2	0	0	1	1	1	1
DUF618	6	1	0	1	0	0	0	1	0	1
eIF-5a	6	1	0	1	0	0	0	1	0	1
ENTH	6	1	0	1	0	0	0	1	0	1
FAD_binding_5	6	1	0	1	0	0	0	1	0	1
Fer2_2	6	1	0	1	0	0	0	1	0	1
GHMP_kinases_C	6	2	0	2	0	0	1	1	1	1
HlyIII	6	3	1	2	0	1	1	1	1	2
Ins134_P3_kin	6	2	0	2	0	0	1	1	1	1
MEKHLA	6	1	0	1	0	0	0	1	0	1
Oleosin	6	2	1	1	0	1	0	1	0	2
Orn_Arg_deC_N	6	1	0	1	0	0	0	1	0	1
Orn_DAP_Arg_deC	6	1	0	1	0	0	0	1	0	1
Oxysterol_BP	6	2	1	1	1	0	0	1	1	1
PAH	6	1	0	1	0	0	0	1	0	1
Peptidase_C13	6	2	0	2	0	0	1	1	1	1
PSK	6	2	1	1	0	1	0	1	0	2
SATase_N	6	3	1	2	0	1	1	1	1	2
SKI	6	4	2	2	1	1	1	1	2	2
TauE	6	3	0	3	0	0	2	1	2	1
ABA_WDS	6	2	1	1	1	0	1	0	2	0
Adenine_glyco	6	3	2	1	0	2	1	0	1	2
ARID	6	1	0	1	0	0	1	0	1	0
B12D	6	1	1	0	0	1	0	0	0	1
Calreticulin	6	2	1	1	1	0	1	0	2	0
CDC50	6	2	2	0	1	1	0	0	1	1
CitMHS	6	4	1	3	1	0	3	0	4	0
Coatomer_WDAD	6	1	0	1	0	0	1	0	1	0
DAGAT	6	1	1	0	1	0	0	0	1	0
DAHP_synth_2	6	1	1	0	1	0	0	0	1	0
DNA_pol3_gamma3	6	1	1	0	1	0	0	0	1	0
DUF212	6	1	1	0	1	0	0	0	1	0
DUF2358	6	3	2	1	2	0	1	0	3	0
DUF3353	6	1	0	1	0	0	1	0	1	0
DUF3490	6	2	0	2	0	0	2	0	2	0
DUF647	6	2	0	2	0	0	2	0	2	0
FMN_dh	6	2	2	0	2	0	0	0	2	0
Glyco_hydro_20	6	1	1	0	1	0	0	0	1	0
HORMA	6	1	0	1	0	0	1	0	1	0
IF-2	6	3	1	2	1	0	2	0	3	0
Ion_trans_2	6	2	1	1	0	1	1	0	1	1
Methyltransf_3	6	1	1	0	1	0	0	0	1	0
MS_channel	6	1	0	1	0	0	1	0	1	0
MT-A70	6	1	1	0	0	1	0	0	0	1
Nop	6	3	1	2	1	0	2	0	3	0
Nuc_sug_transp	6	1	0	1	0	0	1	0	1	0
PARP	6	1	1	0	0	1	0	0	0	1
Peptidase_M28	6	1	0	1	0	0	1	0	1	0
Plus-3	6	1	0	1	0	0	1	0	1	0
PNGaseA	6	1	0	1	0	0	1	0	1	0
Prefoldin_2	6	3	2	1	2	0	1	0	3	0
PseudoU_synth_1	6	1	0	1	0	0	1	0	1	0
Ribosomal_L12	6	1	1	0	1	0	0	0	1	0
Ribosomal_L5	6	2	1	1	1	0	1	0	2	0
Ribosomal_S10	6	2	2	0	2	0	0	0	2	0
Ribosomal_S4	6	1	0	1	0	0	1	0	1	0
RNA_pol_Rpb2_2	6	1	0	1	0	0	1	0	1	0
RST	6	1	1	0	0	1	0	0	0	1
RWD	6	2	1	1	0	1	1	0	1	1
SAC3_GANP	6	2	2	0	1	1	0	0	1	1
Sigma70_r2	6	2	0	2	0	0	2	0	2	0
Sigma70_r3	6	2	0	2	0	0	2	0	2	0
Sigma70_r4	6	2	0	2	0	0	2	0	2	0
Sod_Cu	6	2	0	2	0	0	2	0	2	0
SOR_SNZ	6	1	0	1	0	0	1	0	1	0
SpoU_methylase	6	1	1	0	1	0	0	0	1	0
SSB	6	1	0	1	0	0	1	0	1	0
UBA_e1_thiolCys	6	1	0	1	0	0	1	0	1	0
UBACT	6	1	0	1	0	0	1	0	1	0
UDPG_MGDP_dh_N	6	2	0	2	0	0	2	0	2	0
UDPGP	6	1	0	1	0	0	1	0	1	0
Xpo1	6	1	0	1	0	0	1	0	1	0
Yippee	6	1	0	1	0	0	1	0	1	0
zf-TAZ	6	1	1	0	0	1	0	0	0	1
Citrate_synt	5	3	0	3	0	0	1	2	1	2
DUF1675	5	3	1	2	0	1	0	2	0	3
DUF3711	5	3	0	3	0	0	1	2	1	2
DUF946	5	2	0	2	0	0	0	2	0	2
MFMR	5	2	0	2	0	0	0	2	0	2
SHMT	5	3	0	3	0	0	1	2	1	2
SUI1	5	2	0	2	0	0	0	2	0	2
3HCDH	5	2	0	2	0	0	1	1	1	1
3HCDH_N	5	2	0	2	0	0	1	1	1	1
60KD_IMP	5	2	1	1	1	0	0	1	1	1
Acyl-CoA_dh_N	5	2	1	1	0	1	0	1	0	2
ArsA_ATPase	5	2	1	1	1	0	0	1	1	1
ATS3	5	1	0	1	0	0	0	1	0	1
Choline_transpo	5	3	0	3	0	0	2	1	2	1
Cupin_3	5	2	1	1	1	0	0	1	1	1
DUF1262	5	1	0	1	0	0	0	1	0	1
DUF1997	5	2	1	1	1	0	0	1	1	1
DUF23	5	2	0	2	0	0	1	1	1	1
FBPase	5	5	2	3	2	0	2	1	4	1
Flavodoxin_1	5	2	0	2	0	0	1	1	1	1
Glyco_hydro_79n	5	2	0	2	0	0	1	1	1	1
Glyco_transf_28	5	2	1	1	1	0	0	1	1	1
HIG_1_N	5	2	1	1	0	1	0	1	0	2
HMGL-like	5	1	0	1	0	0	0	1	0	1
Hpt	5	3	2	1	1	1	0	1	1	2
IU_nuc_hydro	5	3	1	2	0	1	1	1	1	2
MAP1_LC3	5	1	0	1	0	0	0	1	0	1
Oxidored_q6	5	1	0	1	0	0	0	1	0	1
Phosphoesterase	5	1	0	1	0	0	0	1	0	1
Steroid_dh	5	1	0	1	0	0	0	1	0	1
TLD	5	1	0	1	0	0	0	1	0	1
Trp_syntA	5	2	1	1	0	1	0	1	0	2
UFD1	5	1	0	1	0	0	0	1	0	1
UPF0114	5	2	1	1	0	1	0	1	0	2
Use1	5	1	0	1	0	0	0	1	0	1
Vps5	5	2	1	1	1	0	0	1	1	1
ATP-synt_B	5	1	1	0	1	0	0	0	1	0
CDP-OH_P_transf	5	1	0	1	0	0	1	0	1	0
cobW	5	1	0	1	0	0	1	0	1	0
Dabb	5	2	0	2	0	0	2	0	2	0
DUF1191	5	3	2	1	2	0	1	0	3	0
DUF1995	5	1	0	1	0	0	1	0	1	0
DUF3406	5	1	0	1	0	0	1	0	1	0
DUF3537	5	1	1	0	0	1	0	0	0	1
DUF607	5	1	1	0	0	1	0	0	0	1
DUF702	5	1	1	0	0	1	0	0	0	1
Enolase_C	5	3	1	2	1	0	2	0	3	0
Enolase_N	5	3	1	2	1	0	2	0	3	0
eRF1_1	5	2	1	1	0	1	1	0	1	1
eRF1_2	5	2	1	1	0	1	1	0	1	1
eRF1_3	5	2	1	1	0	1	1	0	1	1
Fe-S_biosyn	5	1	1	0	0	1	0	0	0	1
FtsJ	5	1	0	1	0	0	1	0	1	0
G6PD_C	5	1	1	0	1	0	0	0	1	0
G6PD_N	5	1	1	0	1	0	0	0	1	0
Gln-synt_C	5	3	0	3	0	0	3	0	3	0
Globin	5	1	1	0	0	1	0	0	0	1
Glyco_hydro_20b	5	1	1	0	1	0	0	0	1	0
Glyco_transf_29	5	1	0	1	0	0	1	0	1	0
GSHPx	5	1	1	0	0	1	0	0	0	1
Hexapep	5	1	1	0	0	1	0	0	0	1
IF-2B	5	2	1	1	1	0	1	0	2	0
K_tetra	5	1	0	1	0	0	1	0	1	0
ketoacyl-synt	5	2	0	2	0	0	2	0	2	0
Ketoacyl-synt_C	5	2	0	2	0	0	2	0	2	0
LEA_3	5	1	1	0	0	1	0	0	0	1
Macro	5	3	2	1	2	0	1	0	3	0
Mo-co_dimer	5	1	0	1	0	0	1	0	1	0
MutS_I	5	2	0	2	0	0	2	0	2	0
MutS_III	5	1	0	1	0	0	1	0	1	0
Na_sulph_symp	5	2	2	0	1	1	0	0	1	1
NC	5	1	1	0	1	0	0	0	1	0
NDK	5	1	0	1	0	0	1	0	1	0
NifU	5	4	4	0	3	1	0	0	3	1
NOSIC	5	3	1	2	1	0	2	0	3	0
Oxidored_molyb	5	1	0	1	0	0	1	0	1	0
PABP	5	1	1	0	1	0	0	0	1	0
PCRF	5	2	0	2	0	0	2	0	2	0
Pentapeptide	5	1	0	1	0	0	1	0	1	0
Pept_tRNA_hydro	5	2	1	1	1	0	1	0	2	0
Peptidase_M50	5	1	1	0	1	0	0	0	1	0
Peptidase_S28	5	1	0	1	0	0	1	0	1	0
PEX11	5	2	2	0	2	0	0	0	2	0
PGK	5	1	1	0	0	1	0	0	0	1
PGM_PMM_I	5	1	0	1	0	0	1	0	1	0
PGM_PMM_II	5	1	0	1	0	0	1	0	1	0
PGM_PMM_III	5	1	0	1	0	0	1	0	1	0
PI-PLC-X	5	1	0	1	0	0	1	0	1	0
PrmA	5	2	0	2	0	0	2	0	2	0
Pyridox_oxidase	5	1	1	0	1	0	0	0	1	0
RdRP	5	1	0	1	0	0	1	0	1	0
Redoxin	5	3	0	3	0	0	3	0	3	0
ResIII	5	1	0	1	0	0	1	0	1	0
Ribosomal_L24e	5	1	1	0	1	0	0	0	1	0
Ribosomal_L4	5	1	0	1	0	0	1	0	1	0
Ribosomal_L5_C	5	2	1	1	1	0	1	0	2	0
Ribosomal_L6	5	2	1	1	1	0	1	0	2	0
Ribosomal_S13	5	1	1	0	1	0	0	0	1	0
Ribosomal_S17	5	1	0	1	0	0	1	0	1	0
RNA_pol_Rpb2_3	5	1	0	1	0	0	1	0	1	0
S-AdoMet_synt_M	5	2	1	1	1	0	1	0	2	0
S-AdoMet_synt_N	5	2	1	1	1	0	1	0	2	0
Sel1	5	1	1	0	1	0	0	0	1	0
SOUL	5	2	2	0	2	0	0	0	2	0
tRNA_SAD	5	1	0	1	0	0	1	0	1	0
tRNA-synt_1c	5	1	0	1	0	0	1	0	1	0
TruB_N	5	1	0	1	0	0	1	0	1	0
UDPG_MGDP_dh_C	5	2	0	2	0	0	2	0	2	0
UPF0041	5	1	0	1	0	0	1	0	1	0
Utp12	5	3	0	3	0	0	3	0	3	0
XPG_I	5	2	1	1	1	0	1	0	2	0
XPG_N	5	2	1	1	1	0	1	0	2	0
LEA_4	4	3	0	3	0	0	0	3	0	3
Aconitase	4	2	0	2	0	0	0	2	0	2
Aconitase_C	4	2	0	2	0	0	0	2	0	2
Choline_kinase	4	3	1	2	0	1	0	2	0	3
Chorismate_bind	4	3	0	3	0	0	1	2	1	2
Acyl-thio_N	4	1	0	1	0	0	0	1	0	1
AMPKBI	4	1	0	1	0	0	0	1	0	1
Asn_synthase	4	1	0	1	0	0	0	1	0	1
Auxin_repressed	4	2	0	2	0	0	1	1	1	1
Barwin	4	3	1	2	0	1	1	1	1	2
CPSase_L_chain	4	3	0	3	0	0	2	1	2	1
CPSase_L_D2	4	3	0	3	0	0	2	1	2	1
DUF829	4	1	0	1	0	0	0	1	0	1
DWNN	4	1	0	1	0	0	0	1	0	1
ELFV_dehydrog	4	2	0	2	0	0	1	1	1	1
ELFV_dehydrog_N	4	2	0	2	0	0	1	1	1	1
FAD_binding_1	4	2	0	2	0	0	1	1	1	1
ICL	4	3	0	3	0	0	2	1	2	1
LEA_1	4	4	3	1	0	3	0	1	0	4
Myosin_HC-like	4	2	1	1	0	1	0	1	0	2
Myosin_N	4	1	0	1	0	0	0	1	0	1
Nucleoside_tran	4	2	0	2	0	0	1	1	1	1
ParA	4	3	1	2	1	0	1	1	2	1
PAT1	4	2	1	1	0	1	0	1	0	2
Peptidase_M10	4	2	1	1	0	1	0	1	0	2
PG_binding_1	4	3	2	1	1	1	0	1	1	2
PGAP1	4	1	0	1	0	0	0	1	0	1
Polyketide_cyc	4	2	0	2	0	0	1	1	1	1
PRP4	4	1	0	1	0	0	0	1	0	1
PUB	4	1	0	1	0	0	0	1	0	1
RecA	4	2	0	2	0	0	1	1	1	1
RmlD_sub_bind	4	1	0	1	0	0	0	1	0	1
S1-P1_nuclease	4	2	1	1	1	0	0	1	1	1
Saccharop_dh	4	1	0	1	0	0	0	1	0	1
Sad1_UNC	4	2	0	2	0	0	1	1	1	1
Spermine_synth	4	3	0	3	0	0	2	1	2	1
TF_Zn_Ribbon	4	1	0	1	0	0	0	1	0	1
Thiolase_C	4	2	1	1	1	0	0	1	1	1
Thiolase_N	4	2	1	1	1	0	0	1	1	1
zf-C5HC2	4	1	0	1	0	0	0	1	0	1
1-cysPrx_C	4	1	1	0	1	0	0	0	1	0
5_nucleotid	4	1	0	1	0	0	1	0	1	0
Abhydro_lipase	4	2	1	1	1	0	1	0	2	0
Acid_phosphat_A	4	1	1	0	0	1	0	0	0	1
ADK_lid	4	1	0	1	0	0	1	0	1	0
Alliinase_C	4	1	0	1	0	0	1	0	1	0
Alpha_adaptinC2	4	1	0	1	0	0	1	0	1	0
ARD	4	2	2	0	1	1	0	0	1	1
ATP-grasp_2	4	1	1	0	1	0	0	0	1	0
Catalase	4	2	1	1	0	1	1	0	1	1
CDC48_2	4	1	1	0	1	0	0	0	1	0
CDC48_N	4	1	1	0	1	0	0	0	1	0
CP12	4	1	1	0	1	0	0	0	1	0
Cyclase	4	1	0	1	0	0	1	0	1	0
DEAD_2	4	1	0	1	0	0	1	0	1	0
DNA_pol_A	4	1	0	1	0	0	1	0	1	0
DSHCT	4	1	1	0	1	0	0	0	1	0
DUF1005	4	1	1	0	1	0	0	0	1	0
DUF1298	4	3	1	2	0	1	2	0	2	1
DUF179	4	1	1	0	0	1	0	0	0	1
DUF1929	4	1	1	0	1	0	0	0	1	0
DUF1981	4	1	1	0	1	0	0	0	1	0
DUF3317	4	1	1	0	0	1	0	0	0	1
DUF3527	4	1	0	1	0	0	1	0	1	0
DUF3633	4	1	1	0	0	1	0	0	0	1
DUF3754	4	1	0	1	0	0	1	0	1	0
DUF565	4	2	1	1	1	0	1	0	2	0
DUF608	4	1	1	0	0	1	0	0	0	1
DUF794	4	1	1	0	1	0	0	0	1	0
EXS	4	1	0	1	0	0	1	0	1	0
FPN1	4	1	0	1	0	0	1	0	1	0
FSH1	4	1	1	0	1	0	0	0	1	0
GIY-YIG	4	1	0	1	0	0	1	0	1	0
Gln-synt_N	4	2	0	2	0	0	2	0	2	0
Glyco_hydro_47	4	1	0	1	0	0	1	0	1	0
Glyco_transf_17	4	1	0	1	0	0	1	0	1	0
Glyco_transf_22	4	1	1	0	1	0	0	0	1	0
Glyoxal_oxid_N	4	1	1	0	1	0	0	0	1	0
Granulin	4	1	0	1	0	0	1	0	1	0
GrpE	4	2	2	0	2	0	0	0	2	0
HABP4_PAI-RBP1	4	3	2	1	2	0	1	0	3	0
HNH	4	2	1	1	1	0	1	0	2	0
Metalloenzyme	4	1	0	1	0	0	1	0	1	0
MIT	4	1	1	0	0	1	0	0	0	1
Mo25	4	1	1	0	1	0	0	0	1	0
Mob1_phocein	4	1	0	1	0	0	1	0	1	0
MutS_II	4	1	0	1	0	0	1	0	1	0
NHL	4	1	0	1	0	0	1	0	1	0
Pec_lyase_N	4	2	1	1	0	1	1	0	1	1
Peptidase_S26	4	1	0	1	0	0	1	0	1	0
Peptidase_S9_N	4	2	0	2	0	0	2	0	2	0
PI-PLC-Y	4	1	0	1	0	0	1	0	1	0
PRMT5	4	1	0	1	0	0	1	0	1	0
PUA	4	1	0	1	0	0	1	0	1	0
Rep-A_N	4	2	2	0	2	0	0	0	2	0
RHD3	4	1	1	0	0	1	0	0	0	1
Ribosomal_L11	4	1	1	0	1	0	0	0	1	0
Ribosomal_L11_N	4	1	1	0	1	0	0	0	1	0
Ribosomal_L20	4	1	0	1	0	0	1	0	1	0
Ribosomal_L3	4	1	1	0	1	0	0	0	1	0
Ribosomal_L33	4	1	1	0	1	0	0	0	1	0
RMMBL	4	1	1	0	1	0	0	0	1	0
RuBisCO_small	4	2	1	1	1	0	1	0	2	0
Sec61_beta	4	1	1	0	1	0	0	0	1	0
Serinc	4	1	0	1	0	0	1	0	1	0
Shikimate_DH	4	1	1	0	1	0	0	0	1	0
Stm1_N	4	3	2	1	2	0	1	0	3	0
Suf	4	1	0	1	0	0	1	0	1	0
TFIIS_M	4	1	1	0	0	1	0	0	0	1
TGS	4	1	1	0	1	0	0	0	1	0
TIP49	4	1	0	1	0	0	1	0	1	0
TLC	4	1	0	1	0	0	1	0	1	0
Topoisom_bac	4	1	0	1	0	0	1	0	1	0
Toprim	4	2	0	2	0	0	2	0	2	0
TRM	4	2	0	2	0	0	2	0	2	0
tRNA-synt_1c_C	4	1	0	1	0	0	1	0	1	0
UBA_e1_C	4	1	0	1	0	0	1	0	1	0
UPF0089	4	3	1	2	0	1	2	0	2	1
WI12	4	1	1	0	0	1	0	0	0	1
Y_phosphatase2	4	1	1	0	0	1	0	0	0	1
ACOX	3	2	0	2	0	0	0	2	0	2
Anth_synt_I_N	3	3	0	3	0	0	1	2	1	2
C1_1	3	2	0	2	0	0	0	2	0	2
DENN	3	2	0	2	0	0	0	2	0	2
DUF1117	3	2	0	2	0	0	0	2	0	2
GalKase_gal_bdg	3	2	0	2	0	0	0	2	0	2
HMG_CoA_synt_C	3	3	1	2	0	1	0	2	0	3
HMG_CoA_synt_N	3	3	1	2	0	1	0	2	0	3
NPR1_like_C	3	2	0	2	0	0	0	2	0	2
Pirin	3	3	1	2	0	1	0	2	0	3
Pirin_C	3	3	1	2	0	1	0	2	0	3
Senescence	3	2	0	2	0	0	0	2	0	2
uDENN	3	2	0	2	0	0	0	2	0	2
ABC_membrane_2	3	2	1	1	1	0	0	1	1	1
Alpha-amylase_C	3	1	0	1	0	0	0	1	0	1
Alpha-mann_mid	3	2	0	2	0	0	1	1	1	1
APG6	3	1	0	1	0	0	0	1	0	1
Biotin_carb_C	3	2	0	2	0	0	1	1	1	1
bZIP_C	3	3	1	2	1	0	1	1	2	1
Cytochrom_C	3	1	0	1	0	0	0	1	0	1
DHBP_synthase	3	1	0	1	0	0	0	1	0	1
DNMT1-RFD	3	1	0	1	0	0	0	1	0	1
DUF177	3	1	0	1	0	0	0	1	0	1
DUF2296	3	2	1	1	0	1	0	1	0	2
DUF393	3	1	0	1	0	0	0	1	0	1
DUF572	3	2	1	1	0	1	0	1	0	2
FAE_3-kCoA_syn1	3	2	0	2	0	0	1	1	1	1
Glu_syn_central	3	2	0	2	0	0	1	1	1	1
Glu_synthase	3	2	0	2	0	0	1	1	1	1
Glyco_hydro_2_N	3	1	0	1	0	0	0	1	0	1
Glyco_hydro_38	3	2	0	2	0	0	1	1	1	1
Glyco_hydro_38C	3	2	0	2	0	0	1	1	1	1
GTP_cyclohydro2	3	1	0	1	0	0	0	1	0	1
GXGXG	3	2	0	2	0	0	1	1	1	1
HDAC_interact	3	1	0	1	0	0	0	1	0	1
Hemerythrin	3	1	0	1	0	0	0	1	0	1
HMG-CoA_red	3	1	0	1	0	0	0	1	0	1
IGPS	3	2	1	1	0	1	0	1	0	2
IMS	3	1	0	1	0	0	0	1	0	1
IMS_C	3	1	0	1	0	0	0	1	0	1
Lipocalin_2	3	1	0	1	0	0	0	1	0	1
LNS2	3	1	0	1	0	0	0	1	0	1
Melibiase	3	2	1	1	1	0	0	1	1	1
PAS_2	3	2	0	2	0	0	1	1	1	1
Peptidase_S41	3	1	0	1	0	0	0	1	0	1
Phytochrome	3	2	0	2	0	0	1	1	1	1
PMI_typeI	3	1	0	1	0	0	0	1	0	1
PQ-loop	3	1	0	1	0	0	0	1	0	1
RCC_reductase	3	1	0	1	0	0	0	1	0	1
RNB	3	3	1	2	1	0	1	1	2	1
Sec15	3	1	0	1	0	0	0	1	0	1
SIS	3	2	0	2	0	0	1	1	1	1
SPT16	3	1	0	1	0	0	0	1	0	1
SRP_SPB	3	2	1	1	1	0	0	1	1	1
Tcp11	3	1	0	1	0	0	0	1	0	1
TPX2_importin	3	2	1	1	1	0	0	1	1	1
V-ATPase_H_N	3	2	1	1	0	1	0	1	0	2
Aha1_N	3	2	2	0	0	2	0	0	0	2
AIRS	3	1	1	0	1	0	0	0	1	0
AIRS_C	3	1	1	0	1	0	0	0	1	0
APS_kinase	3	1	0	1	0	0	1	0	1	0
AT_hook	3	1	0	1	0	0	1	0	1	0
ATP-synt_G	3	1	0	1	0	0	1	0	1	0
BAAT_C	3	1	0	1	0	0	1	0	1	0
Beta-Casp	3	1	1	0	1	0	0	0	1	0
Carboxyl_trans	3	1	0	1	0	0	1	0	1	0
Catalase-rel	3	2	1	1	0	1	1	0	1	1
Cmc1	3	1	1	0	1	0	0	0	1	0
CobW_C	3	1	0	1	0	0	1	0	1	0
COPI_C	3	1	0	1	0	0	1	0	1	0
CSD	3	1	1	0	1	0	0	0	1	0
Cupin_5	3	2	2	0	0	2	0	0	0	2
DcpS_C	3	1	1	0	1	0	0	0	1	0
DNA_gyraseB	3	1	0	1	0	0	1	0	1	0
DNA_pol_B	3	3	1	2	1	0	2	0	3	0
DNA_pol_B_exo	3	3	1	2	1	0	2	0	3	0
DUF1118	3	1	0	1	0	0	1	0	1	0
DUF1264	3	2	1	1	0	1	1	0	1	1
DUF1751	3	1	0	1	0	0	1	0	1	0
DUF3651	3	3	2	1	2	0	1	0	3	0
DUF525	3	1	1	0	1	0	0	0	1	0
DUF59	3	1	0	1	0	0	1	0	1	0
DUF760	3	2	1	1	0	1	1	0	1	1
DUF778	3	3	3	0	1	2	0	0	1	2
DUF971	3	1	0	1	0	0	1	0	1	0
EF1_GNE	3	2	0	2	0	0	2	0	2	0
efhand_like	3	1	0	1	0	0	1	0	1	0
Elf1	3	1	1	0	0	1	0	0	0	1
ERG4_ERG24	3	1	0	1	0	0	1	0	1	0
FAA_hydrolase	3	1	1	0	0	1	0	0	0	1
FtsZ_C	3	1	0	1	0	0	1	0	1	0
GBA2_N	3	1	1	0	0	1	0	0	0	1
GCV_H	3	1	0	1	0	0	1	0	1	0
Glyco_transf_64	3	1	0	1	0	0	1	0	1	0
GSDH	3	1	0	1	0	0	1	0	1	0
GSH_synth_ATP	3	1	1	0	1	0	0	0	1	0
GSH_synthase	3	1	1	0	1	0	0	0	1	0
GTP1_OBG	3	1	0	1	0	0	1	0	1	0
HCO3_cotransp	3	1	0	1	0	0	1	0	1	0
IBB	3	1	0	1	0	0	1	0	1	0
IlvN	3	1	1	0	1	0	0	0	1	0
iPGM_N	3	1	0	1	0	0	1	0	1	0
Kinesin-related	3	1	0	1	0	0	1	0	1	0
LCM	3	1	0	1	0	0	1	0	1	0
Ligase_CoA	3	1	0	1	0	0	1	0	1	0
Lyase_1	3	1	0	1	0	0	1	0	1	0
Lycopene_cycl	3	1	0	1	0	0	1	0	1	0
LYTB	3	1	1	0	1	0	0	0	1	0
Mad3_BUB1_I	3	1	0	1	0	0	1	0	1	0
Methyltransf_12	3	1	0	1	0	0	1	0	1	0
Methyltransf_6	3	1	0	1	0	0	1	0	1	0
NAS	3	1	0	1	0	0	1	0	1	0
NIR_SIR	3	1	0	1	0	0	1	0	1	0
NIR_SIR_ferr	3	1	0	1	0	0	1	0	1	0
NOG1	3	2	1	1	1	0	1	0	2	0
Nucleoporin_C	3	1	0	1	0	0	1	0	1	0
OSCP	3	1	1	0	1	0	0	0	1	0
PC4	3	1	0	1	0	0	1	0	1	0
PDCD2_C	3	1	1	0	1	0	0	0	1	0
PDH	3	1	1	0	1	0	0	0	1	0
Pep_deformylase	3	1	0	1	0	0	1	0	1	0
PEPCK_ATP	3	1	0	1	0	0	1	0	1	0
Peptidase_M22	3	1	0	1	0	0	1	0	1	0
PGM_PMM_IV	3	1	0	1	0	0	1	0	1	0
PHF5	3	1	1	0	1	0	0	0	1	0
PI3Ka	3	1	1	0	0	1	0	0	0	1
Prenyltransf	3	1	1	0	1	0	0	0	1	0
Pro_CA	3	2	1	1	0	1	1	0	1	1
PsaN	3	2	2	0	2	0	0	0	2	0
PsbR	3	2	1	1	1	0	1	0	2	0
Put_Phosphatase	3	1	1	0	0	1	0	0	0	1
RbcS	3	1	0	1	0	0	1	0	1	0
RcbX	3	2	2	0	1	1	0	0	1	1
Rep_fac_C	3	1	0	1	0	0	1	0	1	0
Rer1	3	1	1	0	0	1	0	0	0	1
RFC-E_C	3	1	1	0	1	0	0	0	1	0
RGP	3	1	1	0	1	0	0	0	1	0
Rho_GDI	3	1	1	0	0	1	0	0	0	1
Rib_5-P_isom_A	3	3	2	1	1	1	1	0	2	1
Ribosomal_L18ae	3	1	1	0	1	0	0	0	1	0
Ribosomal_L19	3	1	0	1	0	0	1	0	1	0
Ribosomal_L29	3	1	0	1	0	0	1	0	1	0
Ribosomal_L31e	3	1	0	1	0	0	1	0	1	0
Ribosomal_L34e	3	2	0	2	0	0	2	0	2	0
Ribosomal_L35Ae	3	1	1	0	1	0	0	0	1	0
Ribosomal_L37e	3	1	1	0	1	0	0	0	1	0
Ribosomal_S3Ae	3	1	0	1	0	0	1	0	1	0
Ribosomal_S4e	3	1	1	0	1	0	0	0	1	0
Ribosomal_S8e	3	1	1	0	1	0	0	0	1	0
RNA_POL_M_15KD	3	1	1	0	1	0	0	0	1	0
RNA_pol_Rpc4	3	1	1	0	1	0	0	0	1	0
Rotamase	3	1	1	0	1	0	0	0	1	0
RPA_C	3	1	1	0	1	0	0	0	1	0
RS4NT	3	1	1	0	1	0	0	0	1	0
S10_plectin	3	1	1	0	1	0	0	0	1	0
S6PP_C	3	1	0	1	0	0	1	0	1	0
S-AdoMet_synt_C	3	2	1	1	1	0	1	0	2	0
SAPS	3	1	0	1	0	0	1	0	1	0
Sas10_Utp3	3	1	0	1	0	0	1	0	1	0
SelR	3	1	0	1	0	0	1	0	1	0
SGS	3	1	1	0	0	1	0	0	0	1
SSXT	3	1	0	1	0	0	1	0	1	0
THF_DHG_CYH	3	1	0	1	0	0	1	0	1	0
THF_DHG_CYH_C	3	1	0	1	0	0	1	0	1	0
Tic20	3	1	0	1	0	0	1	0	1	0
TIM	3	1	1	0	1	0	0	0	1	0
Trigger_N	3	2	1	1	1	0	1	0	2	0
URO-D	3	2	0	2	0	0	2	0	2	0
YGGT	3	1	0	1	0	0	1	0	1	0
zf-U1	3	1	0	1	0	0	1	0	1	0
TAP42	2	2	0	2	0	0	0	2	0	2
ALS_ss_C	2	1	0	1	0	0	0	1	0	1
AMP_N	2	2	0	2	0	0	1	1	1	1
APG9	2	1	0	1	0	0	0	1	0	1
BCDHK_Adom3	2	1	0	1	0	0	0	1	0	1
CDC14	2	1	0	1	0	0	0	1	0	1
Choline_kin_N	2	1	0	1	0	0	0	1	0	1
dCMP_cyt_deam_2	2	1	0	1	0	0	0	1	0	1
dDENN	2	1	0	1	0	0	0	1	0	1
DHO_dh	2	1	0	1	0	0	0	1	0	1
DUF2404	2	1	0	1	0	0	0	1	0	1
DUF3752	2	1	0	1	0	0	0	1	0	1
DUF399	2	2	0	2	0	0	1	1	1	1
DUF833	2	1	0	1	0	0	0	1	0	1
Fip1	2	1	0	1	0	0	0	1	0	1
fn3	2	1	0	1	0	0	0	1	0	1
Glyco_hydro_77	2	2	1	1	1	0	0	1	1	1
Glycos_trans_3N	2	2	1	1	1	0	0	1	1	1
HTH_3	2	1	0	1	0	0	0	1	0	1
Inos-1-P_synth	2	1	0	1	0	0	0	1	0	1
IPP-2	2	1	0	1	0	0	0	1	0	1
Josephin	2	1	0	1	0	0	0	1	0	1
Lipin_N	2	1	0	1	0	0	0	1	0	1
MADF_DNA_bdg	2	1	0	1	0	0	0	1	0	1
MBF1	2	1	0	1	0	0	0	1	0	1
MPPN	2	1	0	1	0	0	0	1	0	1
NAD_binding_5	2	1	0	1	0	0	0	1	0	1
NAPRTase	2	1	0	1	0	0	0	1	0	1
NifU_N	2	1	0	1	0	0	0	1	0	1
OMPdecase	2	1	0	1	0	0	0	1	0	1
PAPS_reduct	2	1	0	1	0	0	0	1	0	1
PIG-F	2	1	0	1	0	0	0	1	0	1
PITH	2	1	0	1	0	0	0	1	0	1
Prp18	2	1	0	1	0	0	0	1	0	1
REF	2	1	0	1	0	0	0	1	0	1
Rtt106	2	1	0	1	0	0	0	1	0	1
SPARC_Ca_bdg	2	1	0	1	0	0	0	1	0	1
SSrecog	2	1	0	1	0	0	0	1	0	1
TFIIF_beta	2	1	0	1	0	0	0	1	0	1
Transketolase_N	2	2	1	1	1	0	0	1	1	1
VHP	2	2	1	1	1	0	0	1	1	1
VID27	2	1	0	1	0	0	0	1	0	1
VPS9	2	1	0	1	0	0	0	1	0	1
WCOR413	2	2	1	1	0	1	0	1	0	2
WLM	2	1	0	1	0	0	0	1	0	1
6PF2K	2	1	0	1	0	0	1	0	1	0
AARP2CN	2	1	0	1	0	0	1	0	1	0
ACC_central	2	1	0	1	0	0	1	0	1	0
Act-Frag_cataly	2	1	0	1	0	0	1	0	1	0
Adenylsucc_synt	2	1	0	1	0	0	1	0	1	0
Amidohydro_2	2	1	0	1	0	0	1	0	1	0
ATP-cone	2	1	1	0	1	0	0	0	1	0
ATP-synt	2	1	0	1	0	0	1	0	1	0
Beta_elim_lyase	2	1	1	0	1	0	0	0	1	0
CaMKII_AD	2	1	1	0	1	0	0	0	1	0
CemA	2	1	0	1	0	0	1	0	1	0
ChaC	2	1	1	0	0	1	0	0	0	1
CIAPIN1	2	1	1	0	0	1	0	0	0	1
ClpS	2	1	0	1	0	0	1	0	1	0
CobN-Mg_chel	2	1	1	0	1	0	0	0	1	0
COX17	2	1	0	1	0	0	1	0	1	0
COX5B	2	1	1	0	1	0	0	0	1	0
Cupin_2	2	1	0	1	0	0	1	0	1	0
CutA1	2	1	0	1	0	0	1	0	1	0
CYTH	2	1	1	0	1	0	0	0	1	0
DFP	2	1	0	1	0	0	1	0	1	0
DHDPS	2	1	0	1	0	0	1	0	1	0
DKCLD	2	1	0	1	0	0	1	0	1	0
DNA_mis_repair	2	1	0	1	0	0	1	0	1	0
DUF1295	2	1	0	1	0	0	1	0	1	0
DUF150	2	1	0	1	0	0	1	0	1	0
DUF2431	2	1	0	1	0	0	1	0	1	0
DUF2930	2	1	1	0	1	0	0	0	1	0
DUF309	2	1	1	0	1	0	0	0	1	0
DUF662	2	1	1	0	1	0	0	0	1	0
DUF663	2	1	0	1	0	0	1	0	1	0
DUF699	2	1	0	1	0	0	1	0	1	0
EGF_alliinase	2	1	0	1	0	0	1	0	1	0
EIF_2_alpha	2	1	1	0	1	0	0	0	1	0
Evr1_Alr	2	1	0	1	0	0	1	0	1	0
FabA	2	1	1	0	1	0	0	0	1	0
FAD_binding_2	2	1	1	0	0	1	0	0	0	1
Ferrochelatase	2	1	0	1	0	0	1	0	1	0
FeThRed_A	2	1	1	0	1	0	0	0	1	0
Fibrillarin	2	1	1	0	1	0	0	0	1	0
Foie-gras_1	2	1	0	1	0	0	1	0	1	0
Fumble	2	1	1	0	0	1	0	0	0	1
Gamma-COP	2	1	0	1	0	0	1	0	1	0
GCS2	2	1	0	1	0	0	1	0	1	0
GCV_T	2	1	0	1	0	0	1	0	1	0
GCV_T_C	2	1	0	1	0	0	1	0	1	0
GDC-P	2	1	0	1	0	0	1	0	1	0
Guanylate_kin	2	1	1	0	0	1	0	0	0	1
GUCT	2	1	0	1	0	0	1	0	1	0
HD-ZIP_N	2	1	1	0	0	1	0	0	0	1
IF3_C	2	1	0	1	0	0	1	0	1	0
IF3_N	2	1	0	1	0	0	1	0	1	0
IlvC	2	1	1	0	1	0	0	0	1	0
L51_S25_CI-B8	2	1	0	1	0	0	1	0	1	0
LANC_like	2	1	0	1	0	0	1	0	1	0
LEA_5	2	1	1	0	0	1	0	0	0	1
MAT1	2	1	1	0	1	0	0	0	1	0
Med11	2	1	1	0	1	0	0	0	1	0
Med12	2	1	0	1	0	0	1	0	1	0
MGS	2	1	0	1	0	0	1	0	1	0
MIR	2	2	1	1	0	1	1	0	1	1
Neurochondrin	2	1	0	1	0	0	1	0	1	0
NicO	2	1	1	0	0	1	0	0	0	1
NOGCT	2	2	1	1	1	0	1	0	2	0
Nucleoporin_N	2	1	0	1	0	0	1	0	1	0
P34-Arc	2	1	0	1	0	0	1	0	1	0
PAS_3	2	1	0	1	0	0	1	0	1	0
Peptidase_C26	2	1	1	0	0	1	0	0	0	1
PIG-U	2	1	0	1	0	0	1	0	1	0
PRELI	2	1	1	0	0	1	0	0	0	1
PsbW	2	1	0	1	0	0	1	0	1	0
PsbX	2	1	1	0	1	0	0	0	1	0
PSI_PSAK	2	2	2	0	2	0	0	0	2	0
PSP	2	1	1	0	0	1	0	0	0	1
Remorin_N	2	1	0	1	0	0	1	0	1	0
Rho_N	2	1	0	1	0	0	1	0	1	0
Ribonuc_red_lgC	2	1	1	0	1	0	0	0	1	0
Ribonuc_red_lgN	2	1	1	0	1	0	0	0	1	0
Ribosomal_L28	2	1	1	0	1	0	0	0	1	0
Ribosomal_L32p	2	1	1	0	1	0	0	0	1	0
Ribosomal_L36e	2	1	1	0	1	0	0	0	1	0
Ribosomal_L37ae	2	1	1	0	1	0	0	0	1	0
Ribul_P_3_epim	2	1	0	1	0	0	1	0	1	0
RNA_pol	2	1	0	1	0	0	1	0	1	0
RNA_pol_N	2	1	0	1	0	0	1	0	1	0
RRM_3	2	1	1	0	1	0	0	0	1	0
Rubredoxin	2	2	1	1	1	0	1	0	2	0
SE	2	1	0	1	0	0	1	0	1	0
Seipin	2	1	1	0	0	1	0	0	0	1
SPC25	2	1	1	0	1	0	0	0	1	0
SprT-like	2	1	0	1	0	0	1	0	1	0
Succ_DH_flav_C	2	1	1	0	0	1	0	0	0	1
SUV3_C	2	1	0	1	0	0	1	0	1	0
Synthase_beta	2	1	1	0	1	0	0	0	1	0
TauD	2	1	1	0	0	1	0	0	0	1
Tbf5	2	1	1	0	1	0	0	0	1	0
Tom22	2	1	1	0	1	0	0	0	1	0
Trm112p	2	2	1	1	1	0	1	0	2	0
tRNA_deacylase	2	1	1	0	0	1	0	0	0	1
TruD	2	1	0	1	0	0	1	0	1	0
TSP9	2	2	1	1	1	0	1	0	2	0
TUDOR	2	1	0	1	0	0	1	0	1	0
UPF0004	2	1	0	1	0	0	1	0	1	0
UPF0047	2	2	1	1	1	0	1	0	2	0
Val_tRNA-synt_C	2	1	0	1	0	0	1	0	1	0
V-ATPase_G	2	1	1	0	1	0	0	0	1	0
WHEP-TRS	2	1	1	0	1	0	0	0	1	0
Whirly	2	1	1	0	1	0	0	0	1	0
YchF-GTPase_C	2	1	1	0	1	0	0	0	1	0
YIF1	2	1	0	1	0	0	1	0	1	0
zf-C4_Topoisom	2	1	0	1	0	0	1	0	1	0
zf-UBR	2	1	1	0	1	0	0	0	1	0
AlaDh_PNT_C	1	1	0	1	0	0	0	1	0	1
AlaDh_PNT_N	1	1	0	1	0	0	0	1	0	1
Amidohydro_3	1	1	0	1	0	0	0	1	0	1
An_peroxidase	1	1	0	1	0	0	0	1	0	1
Bestrophin	1	1	0	1	0	0	0	1	0	1
DDHD	1	1	0	1	0	0	0	1	0	1
DUF1223	1	1	0	1	0	0	0	1	0	1
DUF1499	1	1	0	1	0	0	0	1	0	1
DUF1640	1	1	0	1	0	0	0	1	0	1
DUF2838	1	1	0	1	0	0	0	1	0	1
DUF299	1	1	0	1	0	0	0	1	0	1
DUF3522	1	1	0	1	0	0	0	1	0	1
DUF3635	1	1	0	1	0	0	0	1	0	1
DUF3660	1	1	0	1	0	0	0	1	0	1
DUF747	1	1	0	1	0	0	0	1	0	1
DUF775	1	1	0	1	0	0	0	1	0	1
DUF908	1	1	0	1	0	0	0	1	0	1
DUF913	1	1	0	1	0	0	0	1	0	1
EI24	1	1	0	1	0	0	0	1	0	1
EPSP_synthase	1	1	0	1	0	0	0	1	0	1
ERO1	1	1	0	1	0	0	0	1	0	1
Fe_hyd_lg_C	1	1	0	1	0	0	0	1	0	1
Fe_hyd_SSU	1	1	0	1	0	0	0	1	0	1
FERM_M	1	1	0	1	0	0	0	1	0	1
FERM_N	1	1	0	1	0	0	0	1	0	1
Glycos_transf_3	1	1	0	1	0	0	0	1	0	1
HgmA	1	1	0	1	0	0	0	1	0	1
Hs1pro-1_C	1	1	0	1	0	0	0	1	0	1
Hs1pro-1_N	1	1	0	1	0	0	0	1	0	1
IP_trans	1	1	0	1	0	0	0	1	0	1
M16C_assoc	1	1	0	1	0	0	0	1	0	1
MyTH4	1	1	0	1	0	0	0	1	0	1
NPD	1	1	0	1	0	0	0	1	0	1
NPL4	1	1	0	1	0	0	0	1	0	1
OCD_Mu_crystall	1	1	0	1	0	0	0	1	0	1
Proteasom_PSMB	1	1	0	1	0	0	0	1	0	1
Ribonuc_2-5A	1	1	0	1	0	0	0	1	0	1
Saccharop_dh_N	1	1	0	1	0	0	0	1	0	1
SBP56	1	1	0	1	0	0	0	1	0	1
SMN	1	1	0	1	0	0	0	1	0	1
SRP-alpha_N	1	1	0	1	0	0	0	1	0	1
Thioesterase	1	1	0	1	0	0	0	1	0	1
Trehalase	1	1	0	1	0	0	0	1	0	1
UPF0118	1	1	0	1	0	0	0	1	0	1
Uricase	1	1	0	1	0	0	0	1	0	1
V-ATPase_H_C	1	1	0	1	0	0	0	1	0	1
AD	1	1	0	1	0	0	1	0	1	0
Adaptin_binding	1	1	1	0	0	1	0	0	0	1
ADIP	1	1	0	1	0	0	1	0	1	0
AdoHcyase	1	1	0	1	0	0	1	0	1	0
AdoHcyase_NAD	1	1	0	1	0	0	1	0	1	0
Aldolase	1	1	0	1	0	0	1	0	1	0
AMMECR1	1	1	1	0	1	0	0	0	1	0
Anoctamin	1	1	0	1	0	0	1	0	1	0
APC10	1	1	0	1	0	0	1	0	1	0
ASL_C	1	1	0	1	0	0	1	0	1	0
Asp_Glu_race	1	1	1	0	1	0	0	0	1	0
Bac_globin	1	1	1	0	1	0	0	0	1	0
BING4CT	1	1	1	0	1	0	0	0	1	0
Bot1p	1	1	1	0	1	0	0	0	1	0
Cdc6_C	1	1	0	1	0	0	1	0	1	0
CGI-121	1	1	0	1	0	0	1	0	1	0
CHORD	1	1	1	0	1	0	0	0	1	0
Chorismate_synt	1	1	1	0	0	1	0	0	0	1
CHZ	1	1	1	0	1	0	0	0	1	0
Cir_N	1	1	1	0	0	1	0	0	0	1
CLPTM1	1	1	0	1	0	0	1	0	1	0
CM_2	1	1	0	1	0	0	1	0	1	0
CmcI	1	1	1	0	1	0	0	0	1	0
ComA	1	1	1	0	0	1	0	0	0	1
Conotoxin	1	1	1	0	0	1	0	0	0	1
Copper-bind	1	1	1	0	1	0	0	0	1	0
CPSase_L_D3	1	1	0	1	0	0	1	0	1	0
CPSF73-100_C	1	1	1	0	1	0	0	0	1	0
CTP_transf_3	1	1	0	1	0	0	1	0	1	0
CWC25	1	1	1	0	0	1	0	0	0	1
DAD	1	1	1	0	1	0	0	0	1	0
Dala_Dala_lig_C	1	1	1	0	1	0	0	0	1	0
Dala_Dala_lig_N	1	1	1	0	1	0	0	0	1	0
DDOST_48kD	1	1	1	0	1	0	0	0	1	0
DIE2_ALG10	1	1	1	0	1	0	0	0	1	0
DMRL_synthase	1	1	0	1	0	0	1	0	1	0
DNA_gyraseB_C	1	1	0	1	0	0	1	0	1	0
DNA_pol_alpha_N	1	1	1	0	1	0	0	0	1	0
DNA_pol_phi	1	1	0	1	0	0	1	0	1	0
DNA_primase_S	1	1	0	1	0	0	1	0	1	0
DnaB_C	1	1	0	1	0	0	1	0	1	0
DRIM	1	1	0	1	0	0	1	0	1	0
DUF124	1	1	0	1	0	0	1	0	1	0
DUF1683	1	1	0	1	0	0	1	0	1	0
DUF171	1	1	0	1	0	0	1	0	1	0
DUF1716	1	1	1	0	1	0	0	0	1	0
DUF1731	1	1	0	1	0	0	1	0	1	0
DUF1744	1	1	0	1	0	0	1	0	1	0
DUF1817	1	1	0	1	0	0	1	0	1	0
DUF1950	1	1	1	0	1	0	0	0	1	0
DUF1969	1	1	1	0	0	1	0	0	0	1
DUF2039	1	1	1	0	1	0	0	0	1	0
DUF2044	1	1	1	0	1	0	0	0	1	0
DUF2048	1	1	1	0	1	0	0	0	1	0
DUF2428	1	1	0	1	0	0	1	0	1	0
DUF2454	1	1	0	1	0	0	1	0	1	0
DUF2462	1	1	1	0	1	0	0	0	1	0
DUF2854	1	1	1	0	1	0	0	0	1	0
DUF3007	1	1	1	0	1	0	0	0	1	0
DUF3110	1	1	1	0	0	1	0	0	0	1
DUF3326	1	1	1	0	1	0	0	0	1	0
DUF3357	1	1	1	0	0	1	0	0	0	1
DUF3381	1	1	0	1	0	0	1	0	1	0
DUF3639	1	1	0	1	0	0	1	0	1	0
DUF3685	1	1	1	0	1	0	0	0	1	0
DUF382	1	1	1	0	0	1	0	0	0	1
DUF477	1	1	0	1	0	0	1	0	1	0
DUF706	1	1	0	1	0	0	1	0	1	0
DUF751	1	1	1	0	1	0	0	0	1	0
DUF836	1	1	0	1	0	0	1	0	1	0
DUF901	1	1	0	1	0	0	1	0	1	0
dUTPase	1	1	1	0	1	0	0	0	1	0
Ebp2	1	1	0	1	0	0	1	0	1	0
EMG1	1	1	0	1	0	0	1	0	1	0
EXOSC1	1	1	1	0	1	0	0	0	1	0
Fcf2	1	1	1	0	1	0	0	0	1	0
FmdA_AmdA	1	1	0	1	0	0	1	0	1	0
FRG1	1	1	0	1	0	0	1	0	1	0
FTHFS	1	1	0	1	0	0	1	0	1	0
Fucokinase	1	1	0	1	0	0	1	0	1	0
GcpE	1	1	0	1	0	0	1	0	1	0
GlutR_dimer	1	1	1	0	1	0	0	0	1	0
GlutR_N	1	1	1	0	1	0	0	0	1	0
Glyco_transf_9	1	1	0	1	0	0	1	0	1	0
GTP_cyclohydroI	1	1	0	1	0	0	1	0	1	0
GUN4	1	1	0	1	0	0	1	0	1	0
Hap2_elong	1	1	1	0	1	0	0	0	1	0
Hat1_N	1	1	0	1	0	0	1	0	1	0
HPP	1	1	0	1	0	0	1	0	1	0
Hydroxy-O-Methy	1	1	0	1	0	0	1	0	1	0
IF2_N	1	1	0	1	0	0	1	0	1	0
IGPD	1	1	1	0	1	0	0	0	1	0
IMPDH	1	1	0	1	0	0	1	0	1	0
Ins_P5_2-kin	1	1	1	0	0	1	0	0	0	1
IPK	1	1	1	0	1	0	0	0	1	0
Keratin_assoc	1	1	1	0	1	0	0	0	1	0
Lin0512_fam	1	1	1	0	1	0	0	0	1	0
Lir1	1	1	0	1	0	0	1	0	1	0
LrgB	1	1	1	0	1	0	0	0	1	0
Malate_synthase	1	1	1	0	0	1	0	0	0	1
MCM2_N	1	1	0	1	0	0	1	0	1	0
Methyltransf_10	1	1	0	1	0	0	1	0	1	0
Mg-por_mtran_C	1	1	0	1	0	0	1	0	1	0
MIF4G_like	1	1	0	1	0	0	1	0	1	0
MIF4G_like_2	1	1	0	1	0	0	1	0	1	0
MMS19_N	1	1	1	0	1	0	0	0	1	0
MRP-L46	1	1	1	0	1	0	0	0	1	0
MSP	1	1	0	1	0	0	1	0	1	0
MTHFR	1	1	0	1	0	0	1	0	1	0
NARP1	1	1	0	1	0	0	1	0	1	0
NdhM	1	1	1	0	1	0	0	0	1	0
NdhN	1	1	1	0	1	0	0	0	1	0
Nic96	1	1	0	1	0	0	1	0	1	0
NnrU	1	1	1	0	0	1	0	0	0	1
NOB1_Zn_bind	1	1	0	1	0	0	1	0	1	0
Nop14	1	1	0	1	0	0	1	0	1	0
Nop16	1	1	1	0	1	0	0	0	1	0
Nop52	1	1	1	0	1	0	0	0	1	0
Npa1	1	1	0	1	0	0	1	0	1	0
Nrap	1	1	0	1	0	0	1	0	1	0
NT5C	1	1	1	0	0	1	0	0	0	1
Nucleopor_Nup85	1	1	0	1	0	0	1	0	1	0
Nup88	1	1	0	1	0	0	1	0	1	0
OKR_DC_1	1	1	0	1	0	0	1	0	1	0
OKR_DC_1_C	1	1	0	1	0	0	1	0	1	0
Oxidored-like	1	1	1	0	0	1	0	0	0	1
PCNA_C	1	1	0	1	0	0	1	0	1	0
PCNA_N	1	1	0	1	0	0	1	0	1	0
PEMT	1	1	0	1	0	0	1	0	1	0
PetM	1	1	1	0	1	0	0	0	1	0
PHO4	1	1	1	0	1	0	0	0	1	0
Pinin_SDK_memA	1	1	0	1	0	0	1	0	1	0
PLD_envelope	1	1	0	1	0	0	1	0	1	0
PPP5	1	1	0	1	0	0	1	0	1	0
PQQ	1	1	1	0	0	1	0	0	0	1
Prot_inhib_II	1	1	1	0	1	0	0	0	1	0
PsaD	1	1	1	0	1	0	0	0	1	0
Psb28	1	1	1	0	1	0	0	0	1	0
PsbY	1	1	0	1	0	0	1	0	1	0
PSI_PsaE	1	1	1	0	1	0	0	0	1	0
PSI_PsaH	1	1	0	1	0	0	1	0	1	0
Rad1	1	1	1	0	1	0	0	0	1	0
RAP	1	1	1	0	1	0	0	0	1	0
RBFA	1	1	0	1	0	0	1	0	1	0
Rep_fac-A_3	1	1	0	1	0	0	1	0	1	0
ResB	1	1	1	0	1	0	0	0	1	0
RNA_pol_Rpa2_4	1	1	0	1	0	0	1	0	1	0
RNase_H2_suC	1	1	0	1	0	0	1	0	1	0
RTC	1	1	0	1	0	0	1	0	1	0
RTC_insert	1	1	0	1	0	0	1	0	1	0
Rubrerythrin	1	1	1	0	1	0	0	0	1	0
SAE2	1	1	0	1	0	0	1	0	1	0
Sas10_Utp3_C	1	1	0	1	0	0	1	0	1	0
SBDS	1	1	1	0	0	1	0	0	0	1
SBDS_C	1	1	1	0	0	1	0	0	0	1
Sep15_SelM	1	1	0	1	0	0	1	0	1	0
Slu7	1	1	0	1	0	0	1	0	1	0
Spb1_C	1	1	0	1	0	0	1	0	1	0
SSF	1	1	1	0	1	0	0	0	1	0
SURF1	1	1	0	1	0	0	1	0	1	0
TerC	1	1	1	0	1	0	0	0	1	0
TFCD_C	1	1	0	1	0	0	1	0	1	0
ThiC	1	1	0	1	0	0	1	0	1	0
ThylakoidFormat	1	1	0	1	0	0	1	0	1	0
Thymidylate_kin	1	1	1	0	1	0	0	0	1	0
TIP41	1	1	1	0	1	0	0	0	1	0
TRAM	1	1	0	1	0	0	1	0	1	0
TrmE_N	1	1	0	1	0	0	1	0	1	0
tRNA_m1G_MT	1	1	1	0	1	0	0	0	1	0
U3_assoc_6	1	1	1	0	1	0	0	0	1	0
UFC1	1	1	1	0	1	0	0	0	1	0
UPF0014	1	1	0	1	0	0	1	0	1	0
UPF0153	1	1	0	1	0	0	1	0	1	0
UPF0197	1	1	1	0	1	0	0	0	1	0
Utp11	1	1	0	1	0	0	1	0	1	0
Utp21	1	1	0	1	0	0	1	0	1	0
WBS_methylT	1	1	1	0	1	0	0	0	1	0
WGG	1	1	0	1	0	0	1	0	1	0
XRCC4	1	1	0	1	0	0	1	0	1	0
zf-DNA_Pol	1	1	1	0	1	0	0	0	1	0
