# Supplementary material for: Bioinformatic Analysis of Epigenetic and MicroRNA Mediated Regulation of Drought Responsive Genes in Rice
Source: PLoS One. 2012 Nov 8;7(11):e49331. doi: 10.1371/journal.pone.0049331 (PMC3493535; doi:10.1371/journal.pone.0049331)
Supplement: Table S8 — Metabolic pathways (RiceCyc) enriched in the clusters DU, DD, E, ED, NE and NEU. (XLSX) [file pone.0049331.s010.xlsx]

## Sheet: Table-S8
Table S8. Metabolic pathways (RiceCyc) enriched in the clusters DU, DD, E, ED, NE and NEU
S.No	Pathway name	RiceCyc	D	DU	Percent		S.No	Pathway name	RiceCyc	D	E	Percent E over D		S.No	Pathway name	RiceCyc	D	NE	Percent NE over D
1	citrulline biosynthesis	22	8	8	100		1	lysine biosynthesis I	24	6	6	100		1	cholesterol biosynthesis I	17	8	6	75
2	trehalose biosynthesis I	21	8	8	100		2	lysine biosynthesis II	24	6	6	100		2	cholesterol biosynthesis III (via desmosterol)	17	8	6	75
3	proline biosynthesis I	18	7	7	100		3	lysine biosynthesis VI	24	6	6	100		3	suberin biosynthesis	18	6	4	66.6667
4	proline biosynthesis II	18	7	7	100		4	sucrose biosynthesis	25	6	6	100		4	methylerythritol phosphate pathway	13	6	4	66.6667
5	cytokinins degradation	45	10	10	100		5	heme biosynthesis II	15	6	6	100		5	glycerol degradation I	24	5	3	60
6	cholesterol biosynthesis I	17	8	8	100		6	formylTHF biosynthesis II	22	8	8	100
7	cholesterol biosynthesis III (via desmosterol)	17	8	8	100		7	folate polyglutamylation I	18	8	8	100		S.No	Pathway name	RiceCyc	D	NEU	Percent NEU over D
8	beta;-alanine biosynthesis II	12	7	6	85.7143		8	formylTHF biosynthesis I	21	7	7	100		1	cholesterol biosynthesis I	17	8	6	75
9	gamma;-glutamyl cycle	34	6	5	83.3333		9	tryptophan degradation V (side chain pathway)	15	9	9	100		2	cholesterol biosynthesis III (via desmosterol)	17	8	6	75
10	D-lactate fermentation to propionate and acetate	11	6	5	83.3333		10	folate transformations	16	6	6	100
11	leucine biosynthesis	17	6	5	83.3333		11	methylglyoxal degradation I	12	6	6	100
12	tyrosine degradation I	13	6	5	83.3333		12	13-LOX and 13-HPL pathway	30	14	14	100
13	methionine biosynthesis I	12	5	4	80		13	divinyl ether biosynthesis II (13-LOX)	15	7	7	100
14	sucrose degradation I	12	5	4	80		14	gamma;-glutamyl cycle	34	6	6	100
15	tryptophan biosynthesis	24	12	9	75		15	jasmonic acid biosynthesis	42	13	12	92.3077
16	GDP-L-fucose biosynthesis I (from GDP-D-mannose)	13	8	6	75		16	fatty acid beta;-oxidation I	29	12	11	91.6667
17	GDP-D-rhamnose biosynthesis	12	8	6	75		17	reductive TCA cycle I	33	11	10	90.9091
18	TCA cycle variation I	43	15	11	73.3333		18	galactose degradation II	56	22	20	90.9091
19	TCA cycle	35	13	9	69.2308		19	photorespiration	26	10	9	90
20	methionine biosynthesis II	31	6	4	66.6667		20	UDP-galactose biosynthesis (salvage pathway from galactose using UDP-glucose)	47	17	15	88.2353
21	homocysteine and cysteine interconversion	13	6	4	66.6667		21	tRNA charging pathway	127	16	14	87.5
22	phenylalanine biosynthesis I	21	6	4	66.6667		22	de novo biosynthesis of pyrimidine ribonucleotides	29	8	7	87.5
23	phospholipases	38	9	6	66.6667		23	UDP-glucose conversion	73	24	21	87.5
24	mevalonate pathway	20	8	5	62.5		24	beta;-alanine biosynthesis II	12	7	6	85.7143
25	jasmonic acid biosynthesis	42	13	8	61.5385		25	TCA cycle	35	13	11	84.6154
26	cytokinins 7-N-glucoside biosynthesis	1134	91	56	61.5385		26	polyisoprenoid biosynthesis	31	6	5	83.3333
27	cytokinins 9-N-glucoside biosynthesis	972	78	48	61.5385		27	phospholipid biosynthesis II	34	6	5	83.3333
28	cytokinins-O-glucoside biosynthesis	648	52	32	61.5385		28	valine degradation I	28	6	5	83.3333
29	phospholipid biosynthesis I	36	5	3	60		29	methionine biosynthesis II	31	6	5	83.3333
30	acetyl CoA fermentation to butyrate	10	5	3	60		30	homocysteine and cysteine interconversion	13	6	5	83.3333
31	glutaryl-CoA degradation	10	5	3	60		31	D-lactate fermentation to propionate and acetate	11	6	5	83.3333
							32	UDP-D-xylose biosynthesis	9	5	4	80
S.No	Pathway name	RiceCyc	D	DD	Percent DD over D		33	dTDP-L-rhamnose biosynthesis I	49	20	16	80
1	lysine biosynthesis I	24	6	6	100		34	phospholipid biosynthesis I	36	5	4	80
2	lysine biosynthesis II	24	6	6	100		35	acetyl CoA fermentation to butyrate	10	5	4	80
3	lysine biosynthesis VI	24	6	6	100		36	glutaryl-CoA degradation	10	5	4	80
4	tRNA charging pathway	127	16	16	100		37	starch biosynthesis	30	10	8	80
5	UDP-D-xylose biosynthesis	9	5	5	100		38	TCA cycle variation I	43	15	12	80
6	salvage pathways of purine nucleosides	31	9	9	100		39	sucrose degradation III	47	10	8	80
7	purine nucleotides de novo biosynthesis II	44	9	9	100		40	methionine biosynthesis I	12	5	4	80
8	salvage pathways of purine nucleosides II (plant)	24	6	6	100		41	sucrose degradation I	12	5	4	80
9	de novo biosynthesis of pyrimidine deoxyribonucleotides	35	7	7	100		42	salvage pathways of purine nucleosides	31	9	7	77.7778
10	cellulose biosynthesis	30	9	8	88.8889		43	cellulose biosynthesis	30	9	7	77.7778
11	purine nucleotides de novo biosynthesis I	77	17	15	88.2353		44	phospholipases	38	9	7	77.7778
12	phenylpropanoid biosynthesis	22	8	7	87.5		45	salvage pathways of pyrimidine ribonucleotides	38	9	7	77.7778
13	sucrose biosynthesis	25	6	5	83.3333		46	triacylglycerol degradation	99	22	17	77.2727
14	heme biosynthesis II	15	6	5	83.3333		47	salvage pathways of purine and pyrimidine nucleotides	71	22	17	77.2727
15	flavonoid biosynthesis	18	6	5	83.3333		48	UDP-N-acetylgalactosamine biosynthesis	37	13	10	76.9231
16	aspartate degradation II	14	6	5	83.3333		49	purine nucleotides de novo biosynthesis I	77	17	13	76.4706
17	suberin biosynthesis	18	6	5	83.3333		50	phenylpropanoid biosynthesis	22	8	6	75
18	fatty acid elongation -- saturated	28	10	8	80		51	phospholipid desaturation	16	8	6	75
19	mixed acid fermentation	84	19	15	78.9474		52	beta;-alanine betaine biosynthesis	60	12	9	75
20	formylTHF biosynthesis II	22	8	6	75		53	tetrapyrrole biosynthesis I	33	8	6	75
21	folate polyglutamylation I	18	8	6	75		54	glycogen biosynthesis I (from ADP-D-Glucose)	21	8	6	75
22	fatty acid biosynthesis - initial steps	27	8	6	75		55	mevalonate pathway	20	8	6	75
23	fatty acid elongation -- unsaturated II	22	8	6	75		56	GDP-L-fucose biosynthesis I (from GDP-D-mannose)	13	8	6	75
24	phospholipid desaturation	16	8	6	75		57	GDP-D-rhamnose biosynthesis	12	8	6	75
25	fructose degradation to pyruvate and lactate (anaerobic)	117	34	25	73.5294		58	starch degradation	67	24	18	75
26	glycolysis IV (plant cytosol)	110	30	22	73.3333		59	citrulline biosynthesis	22	8	6	75
27	formylTHF biosynthesis I	21	7	5	71.4286		60	trehalose biosynthesis I	21	8	6	75
28	photorespiration	26	10	7	70		61	brassinosteroid biosynthesis II	101	38	28	73.6842
29	sucrose degradation to ethanol and lactate (anaerobic)	198	50	35	70		62	respiration (anaerobic)	65	22	16	72.7273
30	oxidative ethanol degradation I	57	10	7	70		63	gluconeogenesis	80	28	20	71.4286
31	methionine degradation III	55	10	7	70		64	histidine biosynthesis I	29	7	5	71.4286
32	glycolysis I	113	32	22	68.75		65	arginine degradation I (arginase pathway)	17	7	5	71.4286
33	glucose fermentation to lactate II	94	31	21	67.7419		66	proline biosynthesis I	18	7	5	71.4286
34	tryptophan degradation V (side chain pathway)	15	9	6	66.6667		67	proline biosynthesis II	18	7	5	71.4286
35	folate transformations	16	6	4	66.6667		68	cysteine biosynthesis I	22	10	7	70
36	valine degradation I	28	6	4	66.6667		69	cytokinins 7-N-glucoside biosynthesis	1134	91	63	69.2308
37	polyisoprenoid biosynthesis	31	6	4	66.6667		70	cytokinins 9-N-glucoside biosynthesis	972	78	54	69.2308
38	removal of superoxide radicals	75	6	4	66.6667		71	cytokinins-O-glucoside biosynthesis	648	52	36	69.2308
39	isoleucine degradation II	62	12	8	66.6667		72	sucrose degradation to ethanol and lactate (anaerobic)	198	50	34	68
40	aerobic respiration -- electron donor II	107	6	4	66.6667		73	purine nucleotides de novo biosynthesis II	44	9	6	66.6667
41	respiration (anaerobic)-- electron donors reaction list	38	6	4	66.6667		74	salvage pathways of purine nucleosides II (plant)	24	6	4	66.6667
42	aerobic respiration -- electron donors reaction list	36	6	4	66.6667		75	flavonoid biosynthesis	18	6	4	66.6667
43	glutathione-mediated detoxification	47	6	4	66.6667		76	aspartate degradation II	14	6	4	66.6667
44	methylerythritol phosphate pathway	13	6	4	66.6667		77	aerobic respiration -- electron donor II	107	6	4	66.6667
45	NAD salvage pathway II	29	9	6	66.6667		78	respiration (anaerobic)-- electron donors reaction list	38	6	4	66.6667
46	glycolipid desaturation	100	50	33	66		79	aerobic respiration -- electron donors reaction list	36	6	4	66.6667
47	gluconeogenesis	80	28	18	64.2857		80	chlorophyllide a biosynthesis	32	12	8	66.6667
48	ethanol fermentation to acetate	64	14	9	64.2857		81	tryptophan biosynthesis	24	12	8	66.6667
49	betanidin degradation	189	41	26	63.4146		82	proline degradation I	16	6	4	66.6667
50	tetrapyrrole biosynthesis I	33	8	5	62.5		83	proline degradation II	16	6	4	66.6667
51	xylulose-monophosphate cycle	17	8	5	62.5		84	4-hydroxyproline degradation I	15	6	4	66.6667
52	leucine degradation III	66	13	8	61.5385		85	phenylalanine biosynthesis I	21	6	4	66.6667
53	valine degradation II	66	13	8	61.5385		86	leucine biosynthesis	17	6	4	66.6667
54	cysteine biosynthesis I	22	10	6	60		87	glycolipid desaturation	100	50	33	66
55	purine degradation	11	5	3	60		88	fructose degradation to pyruvate and lactate (anaerobic)	117	34	22	64.7059
56	ureide biosynthesis	9	5	3	60		89	ethanol fermentation to acetate	64	14	9	64.2857
57	pentose phosphate pathway (partial)	6	5	3	60		90	mixed acid fermentation	84	19	12	63.1579
58	glycerol degradation I	24	5	3	60		91	xylulose-monophosphate cycle	17	8	5	62.5
							92	glycolysis I	113	32	20	62.5
							93	fatty acid biosynthesis - initial steps	27	8	5	62.5
							94	fatty acid elongation -- unsaturated II	22	8	5	62.5
							95	leucine degradation III	66	13	8	61.5385
							96	valine degradation II	66	13	8	61.5385
							97	phenylalanine degradation III	61	13	8	61.5385
							98	purine degradation	11	5	3	60
							99	ureide biosynthesis	9	5	3	60
							100	pentose phosphate pathway (partial)	6	5	3	60
							101	oxidative ethanol degradation I	57	10	6	60
							102	methionine degradation III	55	10	6	60
							103	enterobactin biosynthesis	86	15	9	60
							S.No	Pathway name	RiceCyc	D	EU	Percent EU over D
							1	gamma;-glutamyl cycle	34	6	5	83.3333
							2	citrulline biosynthesis	22	8	6	75
							3	trehalose biosynthesis I	21	8	6	75
							4	beta;-alanine biosynthesis II	12	7	5	71.4286
							5	proline biosynthesis I	18	7	5	71.4286
							6	proline biosynthesis II	18	7	5	71.4286
							7	D-lactate fermentation to propionate and acetate	11	6	4	66.6667
							8	GDP-L-fucose biosynthesis I (from GDP-D-mannose)	13	8	5	62.5
							9	GDP-D-rhamnose biosynthesis	12	8	5	62.5
							10	jasmonic acid biosynthesis	42	13	8	61.5385
							11	TCA cycle	35	13	8	61.5385
							12	phospholipid biosynthesis I	36	5	3	60
							13	acetyl CoA fermentation to butyrate	10	5	3	60
							14	glutaryl-CoA degradation	10	5	3	60
							15	TCA cycle variation I	43	15	9	60
							16	methionine biosynthesis I	12	5	3	60
							17	sucrose degradation I	12	5	3	60
							S.No	Pathway name	RiceCyc	D	ED	Percent ED over D
							1	lysine biosynthesis I	24	6	6	100
							2	lysine biosynthesis II	24	6	6	100
							3	lysine biosynthesis VI	24	6	6	100
							4	tRNA charging pathway	127	16	14	87.5
							5	sucrose biosynthesis	25	6	5	83.3333
							6	heme biosynthesis II	15	6	5	83.3333
							7	UDP-D-xylose biosynthesis	9	5	4	80
							8	salvage pathways of purine nucleosides	31	9	7	77.7778
							9	formylTHF biosynthesis II	22	8	6	75
							10	folate polyglutamylation I	18	8	6	75
							11	formylTHF biosynthesis I	21	7	5	71.4286
							12	purine nucleotides de novo biosynthesis I	77	17	12	70.5882
							13	photorespiration	26	10	7	70
							14	tryptophan degradation V (side chain pathway)	15	9	6	66.6667
							15	folate transformations	16	6	4	66.6667
							16	valine degradation I	28	6	4	66.6667
							17	cellulose biosynthesis	30	9	6	66.6667
							18	purine nucleotides de novo biosynthesis II	44	9	6	66.6667
							19	salvage pathways of purine nucleosides II (plant)	24	6	4	66.6667
							20	phenylpropanoid biosynthesis	22	8	5	62.5
							21	fatty acid biosynthesis - initial steps	27	8	5	62.5
							22	fatty acid elongation -- unsaturated II	22	8	5	62.5
