# Supplementary material for: Bioinformatic Analysis of Epigenetic and MicroRNA Mediated Regulation of Drought Responsive Genes in Rice
Source: PLoS One. 2012 Nov 8;7(11):e49331. doi: 10.1371/journal.pone.0049331 (PMC3493535; doi:10.1371/journal.pone.0049331)
Supplement: Table S9 — Distribution of DRGs in metabolic pathways among the nine clusters. (XLSX) [file pone.0049331.s011.xlsx]

## Sheet: Table-S9
Table S9. Distribution of DRGs in metabolic pathways among the nine clusters
Pathway	RiceCyc	D	NE	E	NED	NEU	ED	EU	DD	DU
deoxyribose phosphate degradation	4	3	1	2	1	0	0	2	1	2
13-LOX and 13-HPL pathway	15	7	0	7	0	0	3	4	3	4
2-keto glutarate dehydrogenase complex	8	1	0	1	0	0	1	0	1	0
4-hydroxyproline degradation I	15	6	2	4	0	2	3	1	3	3
abscisic acid biosynthesis	1	1	0	1	0	0	1	0	1	0
acetyl CoA fermentation to butyrate	9	4	1	3	1	0	1	2	2	2
acyl-ACP thioesterase pathway	1	1	0	1	0	0	0	1	0	1
aerobic respiration -- electron donor II	107	6	2	4	2	0	2	2	4	2
aerobic respiration -- electron donor III	54	4	1	3	1	0	1	2	2	2
aerobic respiration -- electron donors reaction list	36	6	2	4	2	0	2	2	4	2
alanine biosynthesis II	4	1	1	0	1	0	0	0	1	0
alanine degradation III	4	1	1	0	1	0	0	0	1	0
aminopropanol biosynthesis	12	4	2	2	1	1	1	1	2	2
ammonia assimilation cycle II	5	3	0	3	0	0	3	0	3	0
anthocyanin biosynthesis (pelargonidin 3-O-glucoside, cyanidin 3-O-glucoside)	9	1	0	1	0	0	0	1	0	1
arginine biosynthesis I	9	1	0	1	0	0	0	1	0	1
arginine biosynthesis II (acetyl cycle)	18	2	0	2	0	0	1	1	1	1
arginine biosynthesis IV	6	1	0	1	0	0	0	1	0	1
arginine degradation I (arginase pathway)	17	7	2	5	0	2	3	2	3	4
arginine degradation II	9	3	1	2	0	1	1	1	1	2
arginine degradation III (arginine decarboxylase/agmatinase pathway)	4	1	0	1	0	0	0	1	0	1
arginine degradation IV (arginine decarboxylase/agmatine deiminase pathway)	5	1	0	1	0	0	0	1	0	1
arginine degradation VI (arginase 2 pathway)	3	1	0	1	0	0	0	1	0	1
ascorbate biosynthesis	16	2	0	2	0	0	0	2	0	2
ascorbate glutathione cycle	12	3	2	1	1	1	0	1	1	2
asparagine biosynthesis I	8	2	1	1	1	0	0	1	1	1
asparagine biosynthesis III	3	1	0	1	0	0	0	1	0	1
asparagine degradation I	15	2	1	1	1	0	1	0	2	0
asparagine degradation II	10	1	0	1	0	0	1	0	1	0
aspartate biosynthesis I	5	1	1	0	1	0	0	0	1	0
aspartate degradation II	14	6	2	4	2	0	3	1	5	1
beta-alanine betaine biosynthesis	20	4	1	3	1	0	1	2	2	2
beta-alanine biosynthesis II	12	7	1	6	0	1	1	5	1	6
beta-D-glucuronide degradation	4	2	0	2	0	0	1	1	1	1
betanidin degradation	189	41	19	22	15	4	11	11	26	15
biotin biosynthesis I	14	4	1	3	1	0	1	2	2	2
biotin biosynthesis II	14	4	1	3	1	0	1	2	2	2
branched-chain alpha-keto acid dehydrogenase complex	23	3	1	2	1	0	1	1	2	1
brassinosteroid biosynthesis II	93	37	10	27	3	7	17	10	20	17
Calvin cycle	73	20	9	11	6	3	6	5	12	8
cardiolipin biosynthesis	12	2	1	1	1	0	1	0	2	0
carnitine degradation III	5	3	0	3	0	0	2	1	2	1
cellulose biosynthesis	30	9	2	7	2	0	6	1	8	1
chlorophyll a biosynthesis II	1	1	1	0	1	0	0	0	1	0
chlorophyllide a biosynthesis	32	12	4	8	1	3	5	3	6	6
cholesterol biosynthesis I	5	2	1	1	0	1	0	1	0	2
cholesterol biosynthesis II (via 24,25-dihydrolanosterol)	5	2	1	1	0	1	0	1	0	2
cholesterol biosynthesis III (via desmosterol)	5	2	1	1	0	1	0	1	0	2
choline biosynthesis I	1	1	0	1	0	0	0	1	0	1
choline biosynthesis III	15	4	1	3	0	1	0	3	0	4
chorismate biosynthesis	36	9	4	5	2	2	2	3	4	5
citrulline biosynthesis	20	6	2	4	0	2	0	4	0	6
citrulline degradation	4	1	0	1	0	0	0	1	0	1
CMP-KDO biosynthesis II (from D-arabinose 5-phosphate)	2	1	0	1	0	0	1	0	1	0
coenzyme A biosynthesis	7	1	1	0	0	1	0	0	0	1
coumarin biosynthesis (via 2-coumarate)	1	1	0	1	0	0	1	0	1	0
cyanate degradation	59	4	1	3	0	1	2	1	2	2
cyclopropane and cyclopropene fatty acid biosynthesis	9	3	0	3	0	0	2	1	2	1
cyclopropane fatty acid (CFA) biosynthesis	9	3	0	3	0	0	2	1	2	1
cysteine biosynthesis I	22	10	3	7	1	2	5	2	6	4
cytokinins 7-N-glucoside biosynthesis	162	13	4	9	1	3	4	5	5	8
cytokinins 9-N-glucoside biosynthesis	162	13	4	9	1	3	4	5	5	8
cytokinins degradation	9	2	1	1	0	1	0	1	0	2
cytokinins-O-glucoside biosynthesis	162	13	4	9	1	3	4	5	5	8
de novo biosynthesis of pyrimidine deoxyribonucleotides	21	5	3	2	3	0	2	0	5	0
de novo biosynthesis of pyrimidine ribonucleotides	28	8	1	7	1	0	3	4	4	4
DIMBOA-glucoside degradation	7	3	1	2	1	0	2	0	3	0
divinyl ether biosynthesis II (13-LOX)	15	7	0	7	0	0	3	4	3	4
D-lactate fermentation to propionate and acetate	11	6	1	5	0	1	1	4	1	5
dTDP-L-rhamnose biosynthesis I	36	14	3	11	3	0	4	7	7	7
enterobactin biosynthesis	86	15	6	9	4	2	4	5	8	7
ent-kaurene biosynthesis	6	1	0	1	0	0	1	0	1	0
epicuticular wax biosynthesis	12	2	0	2	0	0	2	0	2	0
ethanol fermentation to acetate	64	14	5	9	4	1	5	4	9	5
ethylene biosynthesis from methionine	32	6	3	3	2	1	1	2	3	3
ethylene glycol degradation	9	3	1	2	0	1	1	1	1	2
fatty acid elongation -- unsaturated II	22	8	3	5	1	2	5	0	6	2
fatty acid beta-oxidation I	28	11	1	10	0	1	5	5	5	6
fatty acid beta-oxidation II (plant, saturated)	17	7	0	7	0	0	4	3	4	3
fatty acid beta-oxidation IV (plant, unsaturated, even number)	7	2	0	2	0	0	1	1	1	1
fatty acid biosynthesis - initial steps	26	8	3	5	1	2	5	0	6	2
fatty acid elongation -- saturated	28	10	5	5	3	2	5	0	8	2
flavin biosynthesis	9	2	0	2	0	0	1	1	1	1
flavonoid biosynthesis	17	6	2	4	2	0	3	1	5	1
flavonol biosynthesis	1	1	0	1	0	0	1	0	1	0
folate polyglutamylation I	12	6	0	6	0	0	4	2	4	2
folate polyglutamylation II	4	1	0	1	0	0	1	0	1	0
folate transformations	16	6	0	6	0	0	4	2	4	2
formylTHF biosynthesis I	19	7	0	7	0	0	5	2	5	2
formylTHF biosynthesis II	17	7	0	7	0	0	5	2	5	2
fructan biosynthesis	2	1	1	0	0	1	0	0	0	1
fructan degradation	2	1	1	0	0	1	0	0	0	1
fructose degradation to pyruvate and lactate (anaerobic)	117	34	12	22	9	3	16	6	25	9
galactose degradation II	56	22	2	20	1	1	10	10	11	11
galactosylcyclitol biosynthesis	6	1	0	1	0	0	0	1	0	1
gallate degradation III (anaerobic)	7	2	0	2	0	0	1	1	1	1
gamma-glutamyl cycle	34	6	0	6	0	0	1	5	1	5
GDP-D-rhamnose biosynthesis	12	8	2	6	1	1	1	5	2	6
GDP-L-fucose biosynthesis I (from GDP-D-mannose)	13	8	2	6	1	1	1	5	2	6
GDP-mannose metabolism	9	2	0	2	0	0	1	1	1	1
geranyldiphosphate biosynthesis	15	2	0	2	0	0	1	1	1	1
geranylgeranyldiphosphate biosynthesis II (plastidic)	21	3	0	3	0	0	2	1	2	1
gibberellin biosynthesis I (non C-3, non C-13 hydroxylation)	2	1	1	0	0	1	0	0	0	1
gibberellin biosynthesis II (early C-3 hydroxylation)	2	1	1	0	0	1	0	0	0	1
gibberellin biosynthesis III (early C-13 hydroxylation)	8	1	1	0	0	1	0	0	0	1
gibberellin inactivation	3	2	0	2	0	0	0	2	0	2
gluconeogenesis	80	28	8	20	5	3	13	7	18	10
glucose fermentation to lactate II	93	31	13	18	7	6	14	4	21	10
glutamate biosynthesis I	5	1	1	0	1	0	0	0	1	0
glutamate degradation III	10	3	0	3	0	0	0	3	0	3
glutamate degradation VII (to butyrate)	8	1	0	1	0	0	0	1	0	1
glutamine biosynthesis I	5	3	0	3	0	0	3	0	3	0
glutamine degradation III	10	2	2	0	2	0	0	0	2	0
glutaryl-CoA degradation	9	4	1	3	1	0	1	2	2	2
glutathione biosynthesis	5	2	1	1	1	0	1	0	2	0
glutathione redox reactions I	7	1	1	0	0	1	0	0	0	1
glutathione-mediated detoxification	47	6	3	3	2	1	2	1	4	2
glycerol degradation I	24	5	3	2	2	1	1	1	3	2
glycerol degradation IV	11	2	0	2	0	0	1	1	1	1
glycine betaine degradation	11	4	0	4	0	0	2	2	2	2
glycine biosynthesis I	7	4	0	4	0	0	2	2	2	2
glycine cleavage complex	11	4	0	4	0	0	4	0	4	0
glycogen biosynthesis I (from ADP-D-Glucose)	21	8	2	6	1	1	3	3	4	4
glycolipid biosynthesis	12	4	3	1	2	1	0	1	2	2
glycolipid desaturation	8	4	1	3	1	0	2	1	3	1
glycolysis I	113	32	12	20	9	3	13	7	22	10
glycolysis IV (plant cytosol)	104	28	11	17	8	3	12	5	20	8
heme biosynthesis II	15	6	0	6	0	0	5	1	5	1
histidine biosynthesis I	24	6	2	4	1	1	2	2	3	3
homocysteine and cysteine interconversion	13	6	1	5	0	1	2	3	2	4
homocysteine degradation	4	2	0	2	0	0	2	0	2	0
homogalacturonan degradation	138	25	11	14	8	3	3	11	11	14
homoserine biosynthesis	10	2	0	2	0	0	2	0	2	0
isoleucine biosynthesis from threonine	25	7	3	4	2	1	1	3	3	4
isoleucine degradation I	14	4	1	3	0	1	2	1	2	2
isoleucine degradation II	62	12	5	7	3	2	5	2	8	4
jasmonic acid biosynthesis	42	13	1	12	1	0	4	8	5	8
L-cysteine degradation I	3	1	1	0	1	0	0	0	1	0
leucine biosynthesis	17	6	2	4	0	2	1	3	1	5
leucine degradation I	11	4	1	3	0	1	1	2	1	3
leucine degradation III	66	13	5	8	3	2	5	3	8	5
linamarin degradation	1	1	0	1	0	0	1	0	1	0
lipid-independent phytate biosynthesis	2	1	0	1	0	0	0	1	0	1
lysine biosynthesis I	22	6	0	6	0	0	6	0	6	0
lysine biosynthesis II	22	6	0	6	0	0	6	0	6	0
lysine biosynthesis IV	4	2	0	2	0	0	0	2	0	2
lysine biosynthesis VI	22	6	0	6	0	0	6	0	6	0
lysine degradation I	4	1	0	1	0	0	0	1	0	1
lysine degradation II	10	2	1	1	0	1	0	1	0	2
maackiain biosynthesis	4	2	2	0	1	1	0	0	1	1
mannose degradation	6	2	0	2	0	0	1	1	1	1
medicarpin biosynthesis	4	2	2	0	1	1	0	0	1	1
methionine biosynthesis I	12	5	1	4	0	1	1	3	1	4
methionine biosynthesis II	27	6	1	5	0	1	2	3	2	4
methionine degradation I (to homocysteine)	8	3	1	2	1	0	2	0	3	0
methionine degradation II	2	1	0	1	0	0	0	1	0	1
methionine degradation III	55	10	4	6	3	1	4	2	7	3
methionine salvage pathway	34	6	3	3	2	1	1	2	3	3
methylerythritol phosphate pathway	12	5	3	2	1	2	2	0	3	2
methylglyoxal degradation I	12	6	0	6	0	0	3	3	3	3
mevalonate degradation	6	2	0	2	0	0	0	2	0	2
mevalonate pathway	20	8	2	6	1	1	2	4	3	5
mixed acid fermentation	84	19	7	12	6	1	9	3	15	4
momilactone biosynthesis	5	2	0	2	0	0	1	1	1	1
myo-inositol biosynthesis	2	1	0	1	0	0	0	1	0	1
NAD biosynthesis I (from aspartate)	4	1	1	0	0	1	0	0	0	1
NAD salvage pathway I	3	1	0	1	0	0	0	1	0	1
NAD salvage pathway II	29	9	5	4	4	1	2	2	6	3
NAD/NADH phosphorylation and dephosphorylation	31	4	2	2	2	0	1	1	3	1
nicotine degradation II	8	1	0	1	0	0	1	0	1	0
nitrate reduction II (assimilatory)	5	3	0	3	0	0	3	0	3	0
O-antigen biosynthesis	3	1	0	1	0	0	0	1	0	1
ornithine biosynthesis	8	1	0	1	0	0	1	0	1	0
oxidative ethanol degradation I	57	10	4	6	3	1	4	2	7	3
oxidative ethanol degradation III	10	4	3	1	1	2	1	0	2	2
pantothenate biosynthesis I	12	2	1	1	0	1	1	0	1	1
pantothenate biosynthesis II	12	2	1	1	0	1	1	0	1	1
pentose phosphate pathway (non-oxidative branch)	11	7	4	3	2	2	2	1	4	3
pentose phosphate pathway (oxidative branch)	20	3	1	2	1	0	1	1	2	1
pentose phosphate pathway (partial)	4	3	1	2	1	0	1	1	2	1
peptidoglycan biosynthesis I	5	1	1	0	1	0	0	0	1	0
phenylalanine biosynthesis I	21	6	2	4	0	2	2	2	2	4
phenylalanine degradation III	61	13	5	8	3	2	4	4	7	6
phenylpropanoid biosynthesis	19	6	2	4	2	0	3	1	5	1
phenylpropanoid biosynthesis, initial reactions	9	1	1	0	0	1	0	0	0	1
phospholipases	38	9	2	7	1	1	2	5	3	6
phospholipid biosynthesis I	36	5	1	4	1	0	1	3	2	3
phospholipid biosynthesis II	34	6	1	5	1	0	2	3	3	3
phospholipid desaturation	8	4	1	3	1	0	2	1	3	1
photorespiration	26	10	1	9	0	1	7	2	7	3
phytyl-PP biosynthesis	1	1	1	0	1	0	0	0	1	0
pinobanksin biosynthesis	3	1	1	0	1	0	0	0	1	0
plastoquinone biosynthesis	4	2	1	1	0	1	1	0	1	1
polyisoprenoid biosynthesis	20	5	1	4	1	0	3	1	4	1
ppGpp biosynthesis	4	3	0	3	0	0	0	3	0	3
proanthocyanidin biosynthesis from flavanols	1	1	0	1	0	0	1	0	1	0
proline biosynthesis I	16	5	2	3	0	2	0	3	0	5
proline biosynthesis II	16	5	2	3	0	2	0	3	0	5
proline biosynthesis V (from arginine)	5	1	0	1	0	0	0	1	0	1
proline degradation I	16	6	2	4	0	2	3	1	3	3
proline degradation II	16	6	2	4	0	2	3	1	3	3
PRPP biosynthesis I	4	2	1	1	0	1	0	1	0	2
purine degradation	11	5	2	3	2	0	1	2	3	2
purine nucleotides de novo biosynthesis I	59	15	4	11	3	1	10	1	13	2
purine nucleotides de novo biosynthesis II	40	8	3	5	3	0	5	0	8	0
putrescine biosynthesis I	4	1	0	1	0	0	0	1	0	1
putrescine biosynthesis II	5	1	0	1	0	0	0	1	0	1
pyridine nucleotide cycling (plants)	3	1	0	1	0	0	0	1	0	1
pyridoxal 5'-phosphate biosynthesis	6	2	2	0	1	1	0	0	1	1
pyridoxal 5'-phosphate salvage pathway	4	1	1	0	1	0	0	0	1	0
pyruvate dehydrogenase complex	8	2	0	2	0	0	1	1	1	1
reductive TCA cycle I	29	9	1	8	1	0	4	4	5	4
removal of superoxide radicals	75	6	3	3	1	2	3	0	4	2
respiration (anaerobic)	61	20	6	14	4	2	7	7	11	9
respiration (anaerobic)-- electron donors reaction list	38	6	2	4	2	0	2	2	4	2
ribose degradation	13	2	1	1	0	1	1	0	1	1
S-adenosyl-L-methionine cycle	10	3	1	2	1	0	2	0	3	0
S-adenosylmethionine biosynthesis	8	2	1	1	1	0	1	0	2	0
salicylate biosynthesis	9	1	1	0	0	1	0	0	0	1
salvage pathways of adenine, hypoxanthine, and their nucleosides	10	3	0	3	0	0	2	1	2	1
salvage pathways of purine and pyrimidine nucleotides	61	18	4	14	1	3	10	4	11	7
salvage pathways of purine nucleosides	30	9	2	7	2	0	7	0	9	0
salvage pathways of purine nucleosides II (plant)	23	6	2	4	2	0	4	0	6	0
salvage pathways of pyrimidine deoxyribonucleotides	3	1	0	1	0	0	0	1	0	1
salvage pathways of pyrimidine ribonucleotides	36	8	2	6	0	2	4	2	4	4
secologanin and strictosidine biosynthesis	20	2	0	2	0	0	2	0	2	0
serine biosynthesis	7	2	2	0	2	0	0	0	2	0
spermidine biosynthesis	9	4	1	3	0	1	2	1	2	2
spermine biosynthesis	7	3	1	2	0	1	2	0	2	1
sphingolipid metabolism	7	2	1	1	1	0	0	1	1	1
stachyose biosynthesis	1	1	0	1	0	0	0	1	0	1
starch biosynthesis	30	10	2	8	1	1	4	4	5	5
starch degradation	54	18	5	13	2	3	7	6	9	9
stearoyl-ACP desaturation pathway	8	2	2	0	2	0	0	0	2	0
sterol biosynthesis	18	3	0	3	0	0	2	1	2	1
suberin biosynthesis	16	4	3	1	2	1	1	0	3	1
sucrose biosynthesis	25	6	0	6	0	0	5	1	5	1
sucrose degradation I	12	5	1	4	0	1	1	3	1	4
sucrose degradation III	47	10	2	8	0	2	5	3	5	5
sucrose degradation to ethanol and lactate (anaerobic)	197	50	16	34	12	4	23	11	35	15
sulfate reduction I (assimilatory)	4	1	0	1	0	0	0	1	0	1
sulfite oxidation III	3	1	0	1	0	0	0	1	0	1
TCA cycle	31	11	2	9	1	1	3	6	4	7
TCA cycle variation I	39	13	3	10	1	2	3	7	4	9
tetrahydrofolate biosynthesis I	11	1	0	1	0	0	1	0	1	0
tetrahydrofolate biosynthesis II	14	3	0	3	0	0	3	0	3	0
tetrapyrrole biosynthesis I	33	8	2	6	1	1	4	2	5	3
thiamine biosynthesis	4	1	1	0	0	1	0	0	0	1
thiosulfate disproportionation III (rhodanese)	2	1	1	0	1	0	0	0	1	0
threonine biosynthesis from homoserine	16	4	0	4	0	0	4	0	4	0
threonine degradation II	12	4	2	2	1	1	1	1	2	2
threonine degradation III (to methylglyoxal)	12	4	2	2	1	1	1	1	2	2
trans,trans-farnesyl diphosphate biosynthesis	16	3	0	3	0	0	2	1	2	1
trehalose biosynthesis I	19	7	2	5	0	2	0	5	0	7
trehalose biosynthesis V	3	2	1	1	0	1	1	0	1	1
trehalose degradation II (high osmolarity)	1	1	0	1	0	0	0	1	0	1
triacylglycerol biosynthesis	9	1	0	1	0	0	0	1	0	1
triacylglycerol degradation	99	22	5	17	3	2	9	8	12	10
tRNA charging pathway	72	8	1	7	1	0	7	0	8	0
tryptophan biosynthesis	24	12	4	8	1	3	2	6	3	9
tryptophan degradation III (eukaryotic)	2	1	0	1	0	0	1	0	1	0
tryptophan degradation V (side chain pathway)	5	3	0	3	0	0	2	1	2	1
tyrosine degradation I	13	6	3	3	0	3	1	2	1	5
UDP-D-glucuronate biosynthesis (from myo-inositol)	1	1	0	1	0	0	1	0	1	0
UDP-D-xylose biosynthesis	9	5	1	4	1	0	4	0	5	0
UDP-galactose biosynthesis (salvage pathway from galactose using UDP-glucose)	47	17	2	15	1	1	6	9	7	10
UDP-glucose conversion	73	24	3	21	1	2	13	8	14	10
UDP-N-acetylgalactosamine biosynthesis	37	13	3	10	2	1	4	6	6	7
ureide biosynthesis	9	5	2	3	2	0	1	2	3	2
valine biosynthesis	24	7	3	4	2	1	1	3	3	4
valine degradation I	28	6	1	5	0	1	4	1	4	2
valine degradation II	66	13	5	8	3	2	5	3	8	5
very long chain fatty acid biosynthesis	2	1	0	1	0	0	0	1	0	1
vitamin E biosynthesis	5	2	1	1	0	1	1	0	1	1
xylulose-monophosphate cycle	17	8	3	5	3	0	2	3	5	3
